# Supplementary material for: Compensatory sequence variation between trans-species small RNAs and their target sites
Source: PubMed Central journal article supplement (PMC6917502; doi:10.7554/elife.49750), 2019-12-17

Depth of Coverage

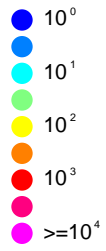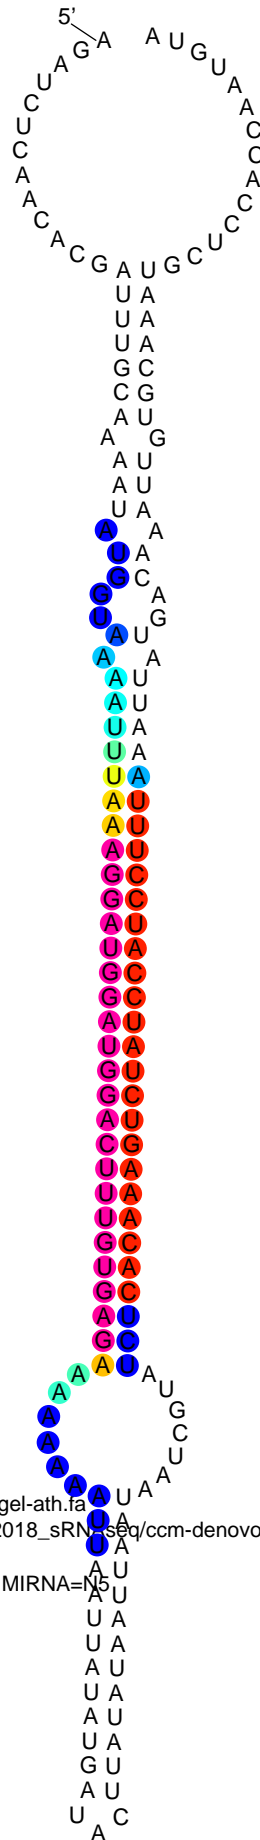

Genome: /Volumes/Keep/+genomes/hybrid\_genomes/hybrid.vogel-ath.fa  
 Alignments: /Volumes/Keep/+Cuscuta\_evolution/NextSeq\_Sep2018\_sRNA-seq/ccm-denovo\_sRNA\_annotation/02out-cca.hybrid.ShortStack/merged\_alignments  
 Location: Ccam0.32\_scaffold130:710943-711105 plus  
 Name: SFs=SupFam\_270,SupFam\_64, SSCI=Cluster\_108739, MIRNA=N5

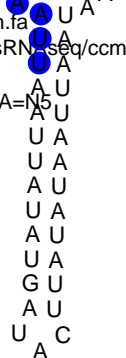



Depth of Coverage

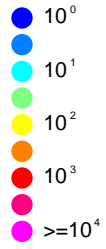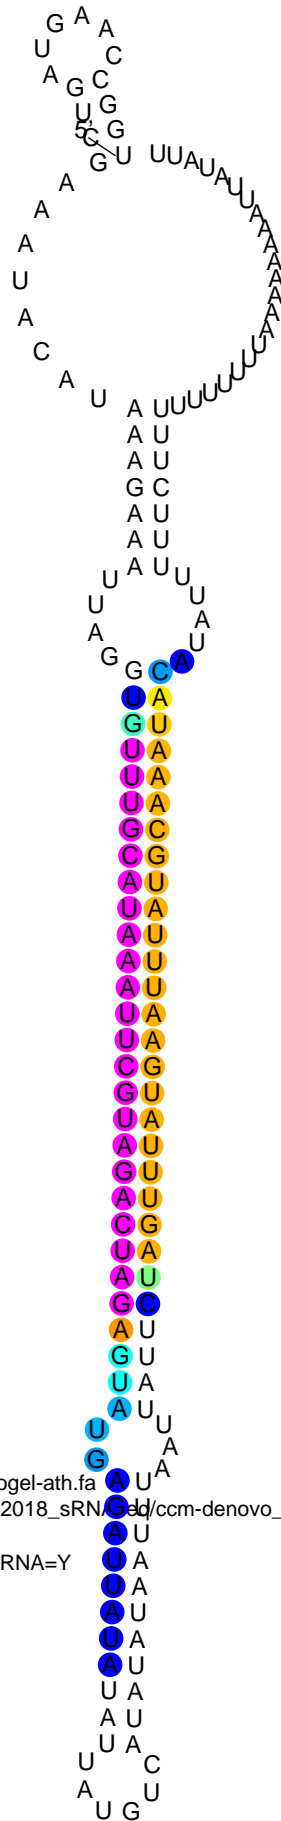

Genome: /Volumes/Keep/+genomes/hybrid\_genomes/hybrid.vogel-ath.fa  
Alignments: /Volumes/Keep/+Cuscuta\_evolution/NextSeq\_Sep2018\_sRNA/Ed/cem-denovo\_sRNA\_annotation/02out-cca.hybrid.ShortStack/merged\_alignments  
Location: Ccam0.32\_scaffold7:1040571-1040728 minus  
Name: SFs=SupFam\_1,SupFam\_28, SSCI=Cluster\_11079, MIRNA=Y

Depth of Coverage

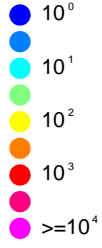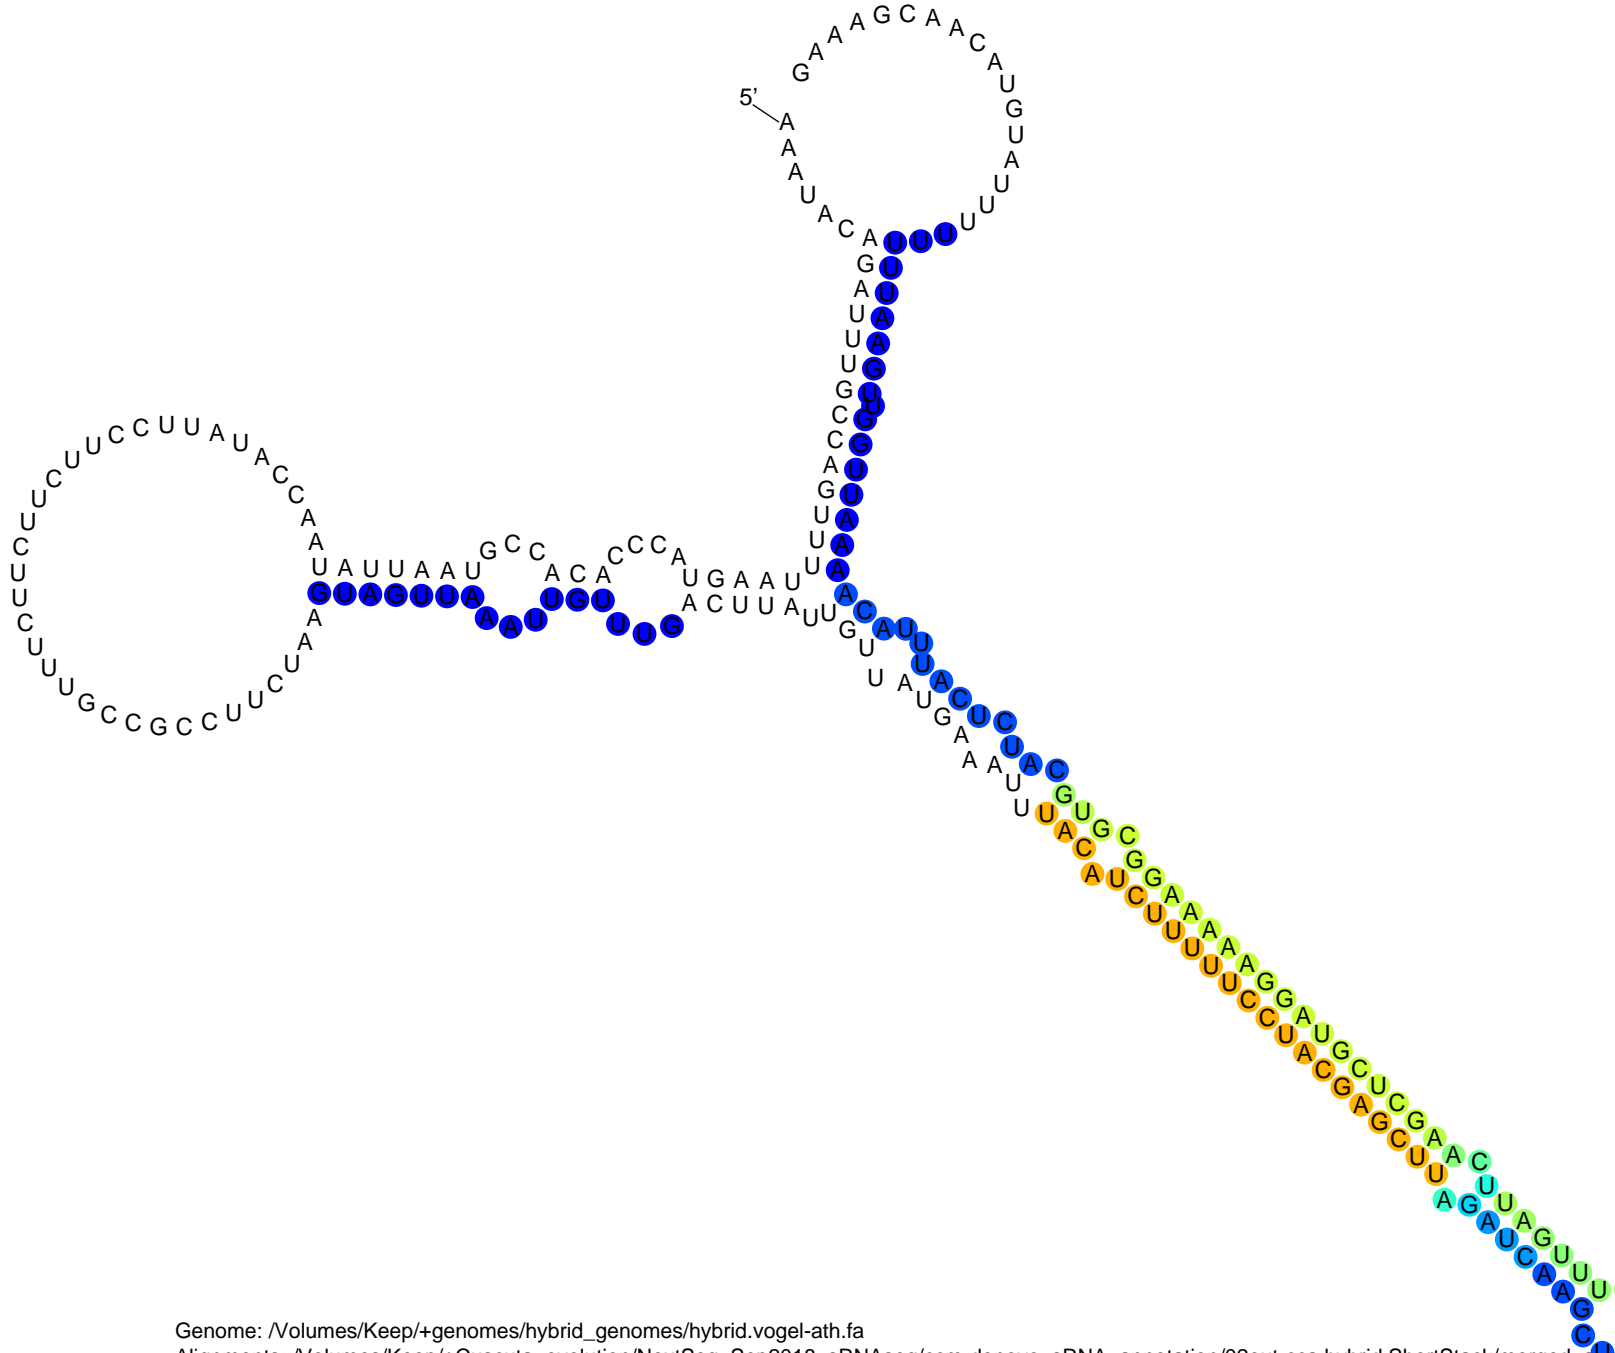

Genome: /Volumes/Keep/+genomes/hybrid\_genomes/hybrid.vogel-ath.fa

Alignments: /Volumes/Keep/+Cuscuta\_evolution/NextSeq\_Sep2018\_sRNAseq/cem-denovo\_sRNA\_annotation/02out-cca.hybrid.ShortStack/merged\_a

Location: Ccam0.32\_scaffold7:1043792-1044034 minus

Name: SFs=SupFam\_305, SSCI=Cluster\_11081, MIRNA=Y

Depth of Coverage

- $10^0$
- $10^1$
- $10^2$
- $10^3$
- $\geq 10^4$

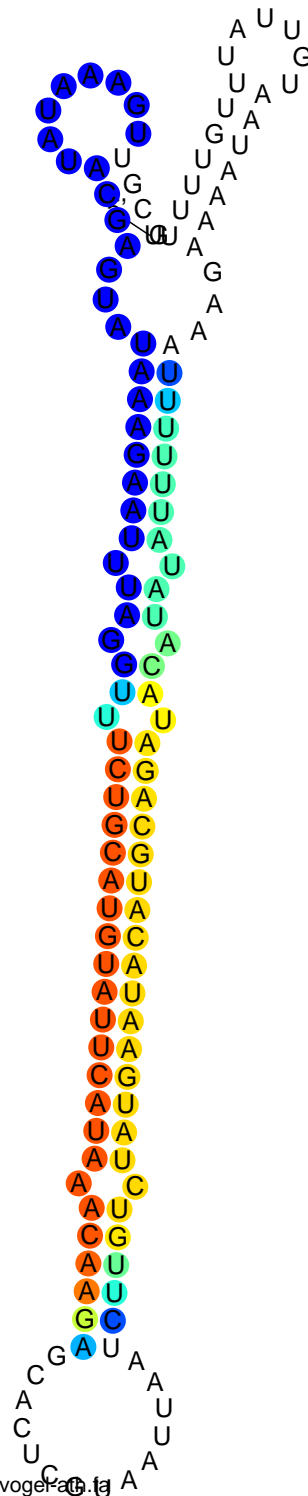

Genome: /Volumes/Keep/+genomes/hybrid\_genomes/hybrid.vogel2018.gb

Alignments: /Volumes/Keep/+Cuscuta\_evolution/NextSeq\_Sep2018\_sRNAseq/cem-denovo\_sRNA\_annotation/02out-cca.hybrid.ShortStack/merged\_alignments

Location: Ccam0.32\_scaffold7:1050580-1050736 plus

Name: SFs=SupFam\_28,SupFam\_1, SSCI=Cluster\_11083, MIRNA+NA

A U  
U A  
A U  
U A  
A U  
C A  
G C  
A U  
U G

Depth of Coverage

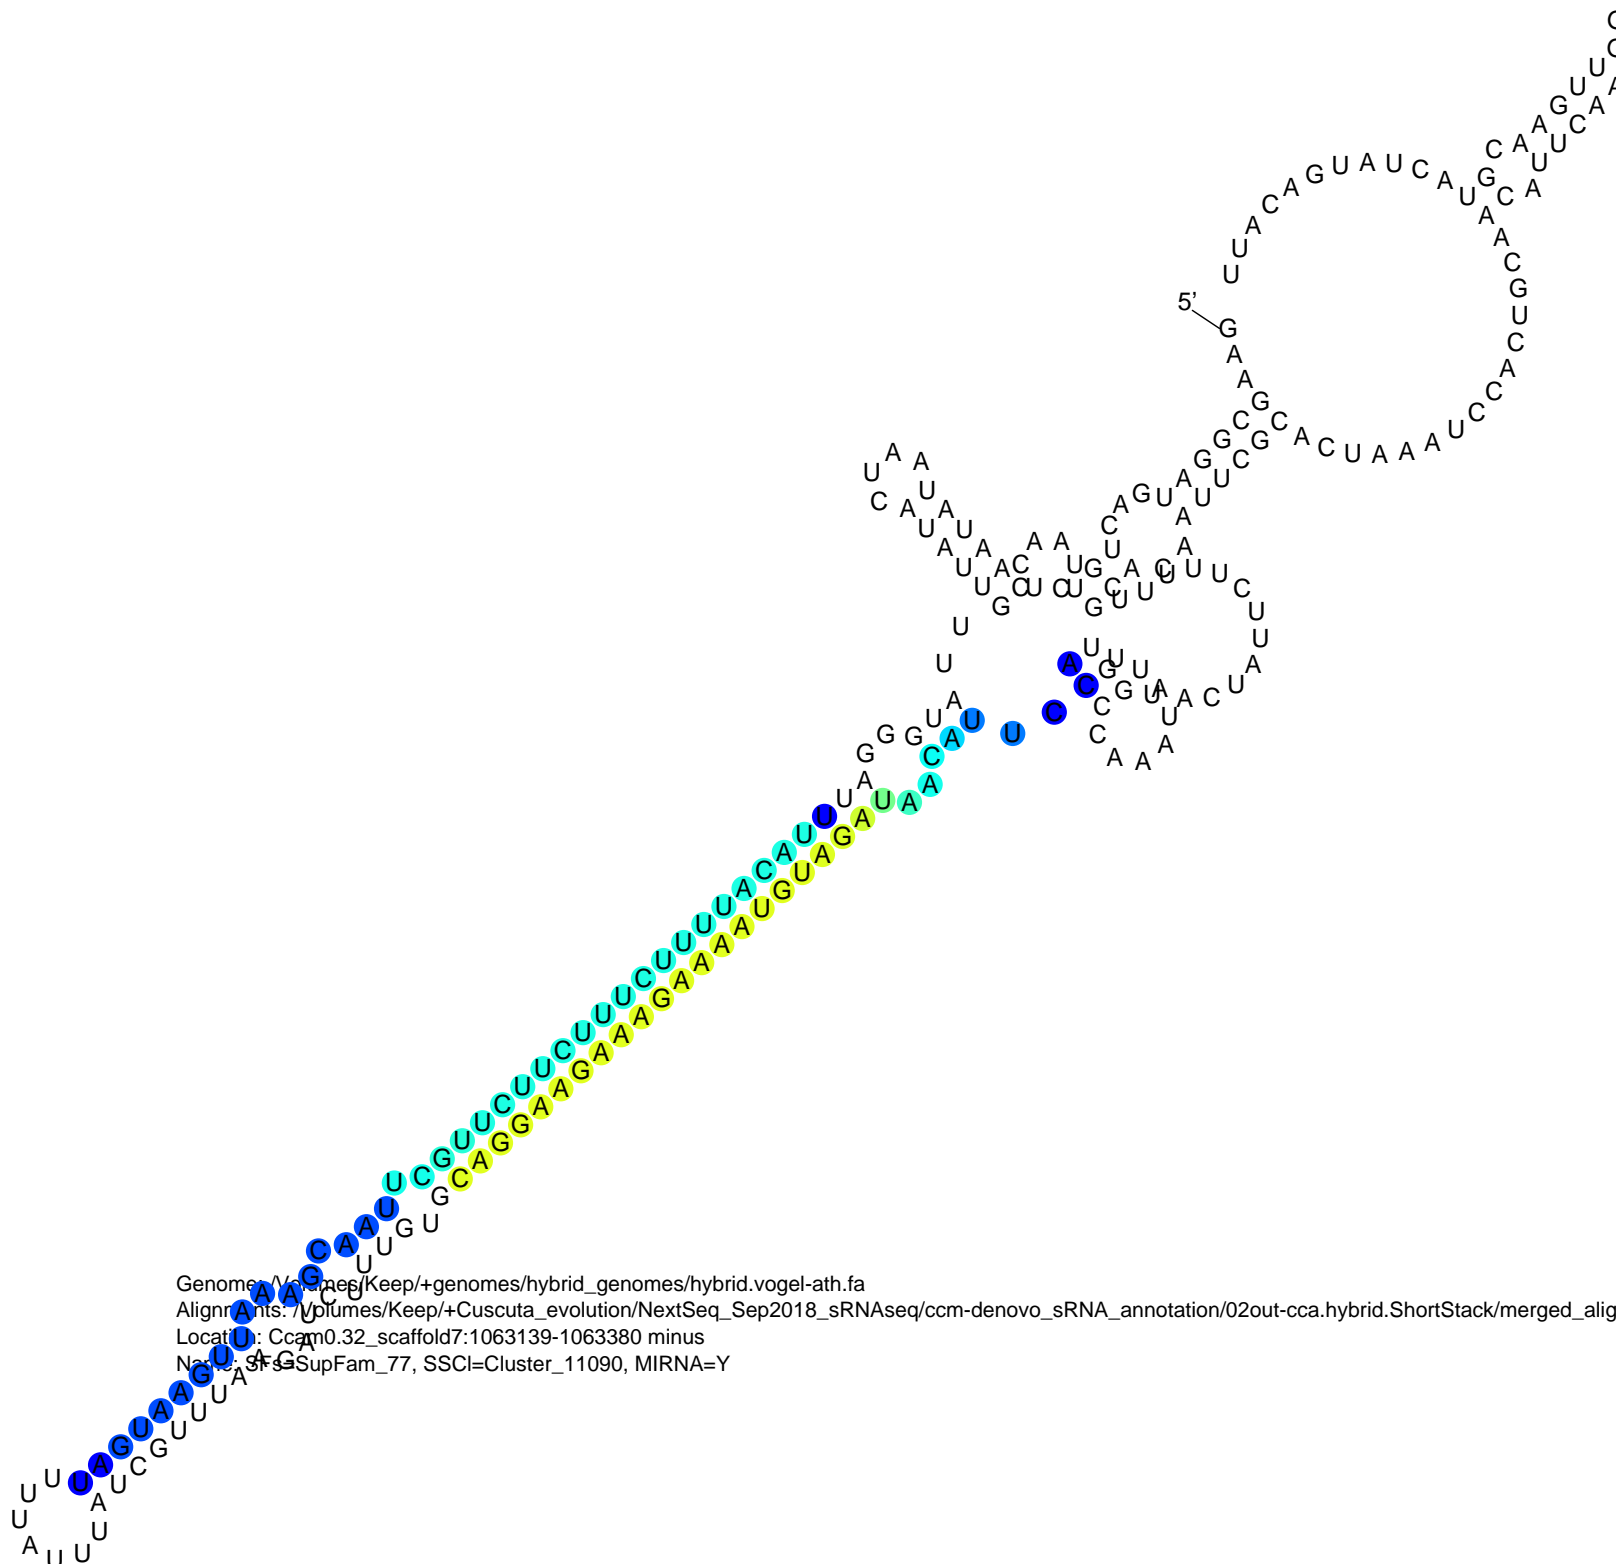

Genome: *M. luteus*/Keep/+genomes/hybrid\_genomes/hybrid.vogel-ath.fa

Alignm: *nts*: /Volumes/Keep/+Cuscuta\_evolution/NextSeq\_Sep2018\_sRNAseq/ccm-denovo\_sRNA\_annotation/02out-cca.hybrid.ShortStack/merged\_alignm

Locat: Ccam0.32\_scaffold7:1063139-1063380 minus

Name: sRNA-SupFam\_77, SSCI=Cluster\_11090, MIRNA=Y

Depth of Coverage

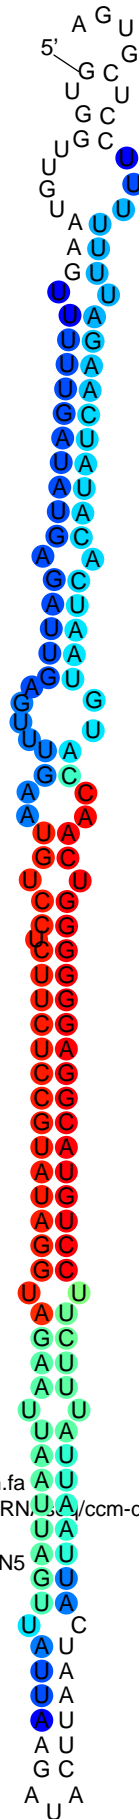

Genome: /Volumes/Keep/+genomes/hybrid\_genomes/hybrid.vogel-ath.fa  
 Alignments: /Volumes/Keep/+Cuscuta\_evolution/NextSeq\_Sep2018\_sRNA/+/ccm-denovo\_sRNA\_annotation/02out-cca.hybrid.ShortStack/merged\_alignments  
 Location: Ccam0.32\_scaffold136:450372-450528 minus  
 Name: SFs=SupFam\_5,SupFam\_40, SSCI=Cluster\_111275, MIRNA=N5









Depth of Coverage

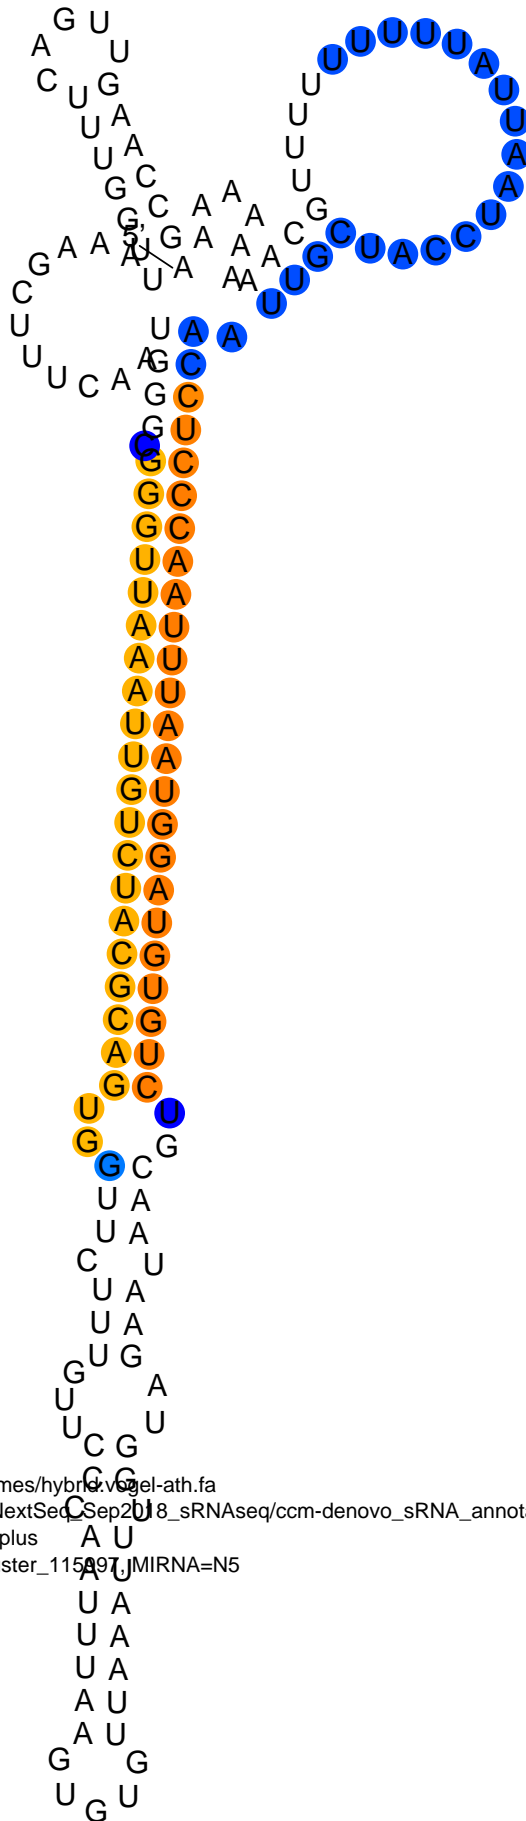

Genome: /Volumes/Keep/+genomes/hybrid\_genomes/hybrid\_vogel-ath.fa

Alignments: /Volumes/Keep/+Cuscuta\_evolution/NextSeq\_Sep2018\_sRNAseq/ccm-denovo\_sRNA\_annotation/02out-cca.hybrid.ShortStack/merged\_align

Location: Ccam0.32\_scaffold148:459123-459283 plus

Name: SFs=SupFam\_49,SupFam\_130, SSCI=Cluster\_115897, MIRNA=N5

A U  
U A  
U A  
U A  
A U  
A U  
G G  
U G

Depth of Coverage

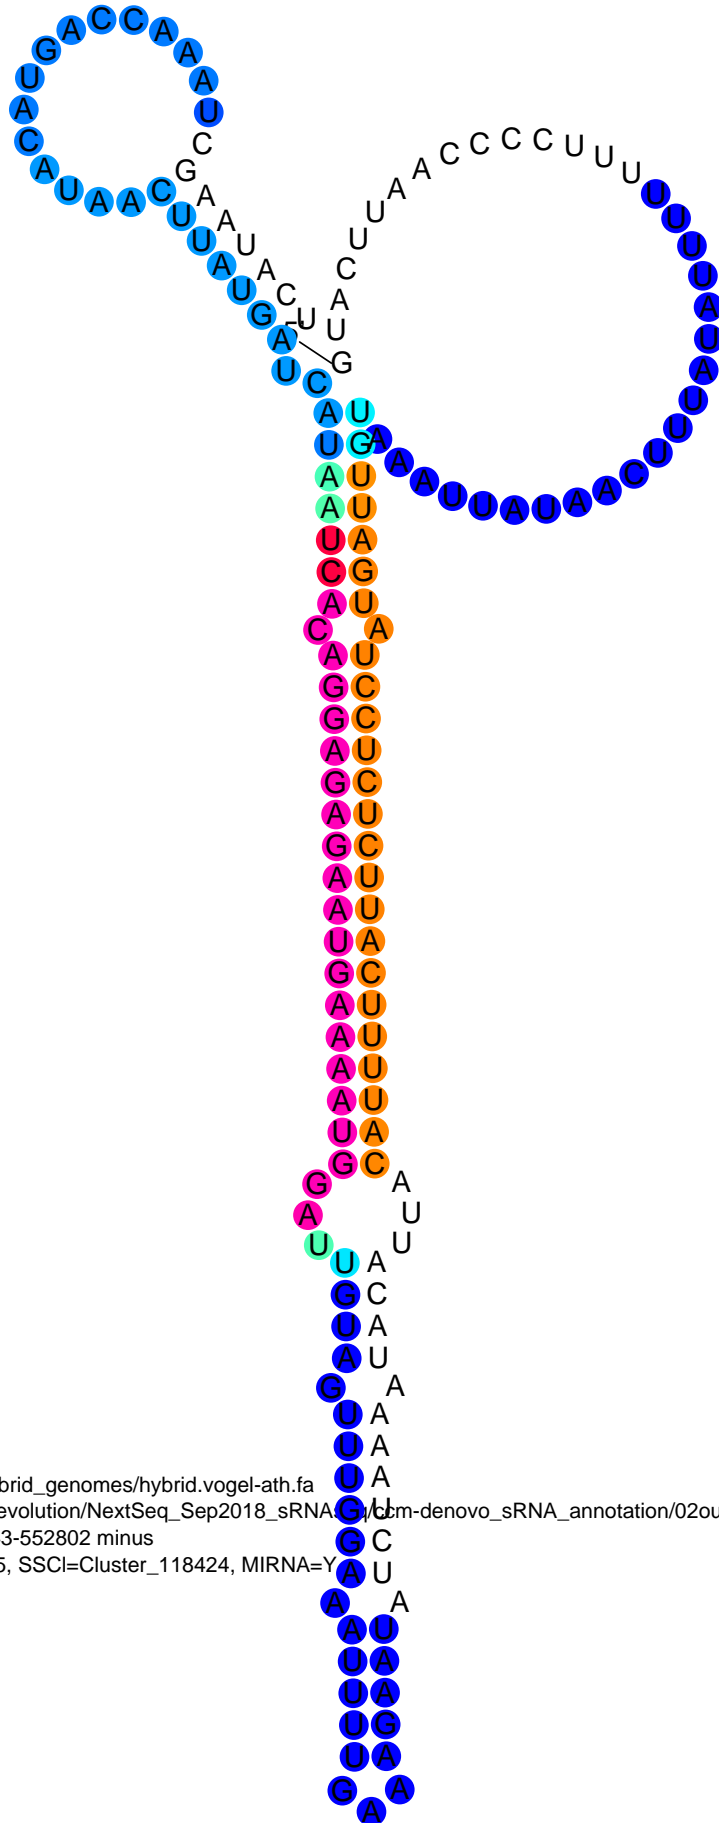

Genome: /Volumes/Keep/+genomes/hybrid\_genomes/hybrid.vogel-ath.fa

Alignments: /Volumes/Keep/+Cuscuta\_evolution/NextSeq\_Sep2018\_sRNA/abm-denovo\_sRNA\_annotation/02out-cca.hybrid.ShortStack/merged\_alignments

Location: Ccam0.32\_scaffold155:552643-552802 minus

Name: SFs=SupFam\_197,SupFam\_765, SSCI=Cluster\_118424, MIRNA=Y

Depth of Coverage

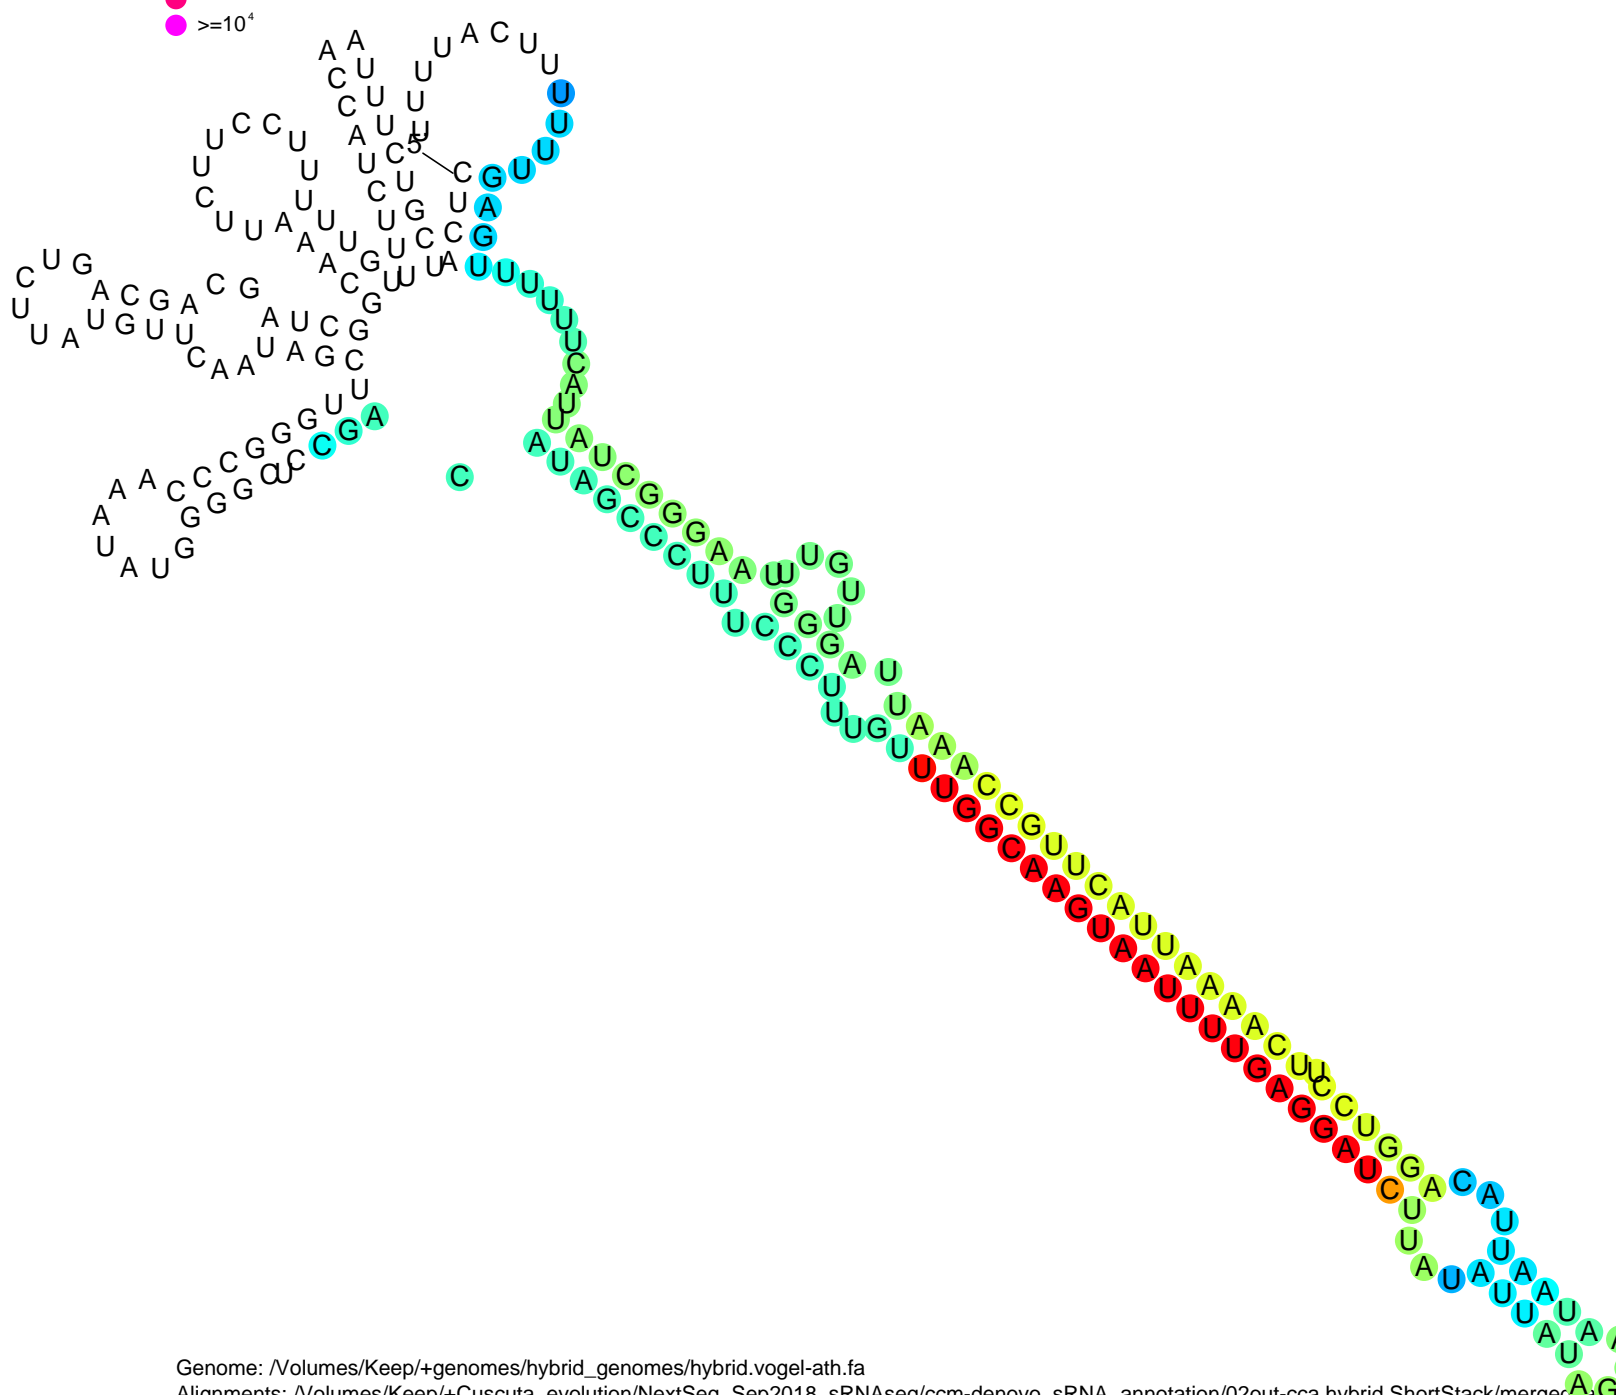

Genome: /Volumes/Keep/+genomes/hybrid\_genomes/hybrid.vogel-ath.fa

Alignments: /Volumes/Keep/+Cuscuta\_evolution/NextSeq\_Sep2018\_sRNAseq/cem-denovo\_sRNA\_annotation/02out-cca.hybrid.ShortStack/merged\_a

Location: Ccam0.32\_scaffold157:653384-653625 minus

Name: SFs=SupFam\_759, SSCI=Cluster\_119071, MIRNA=N5







Depth of Coverage

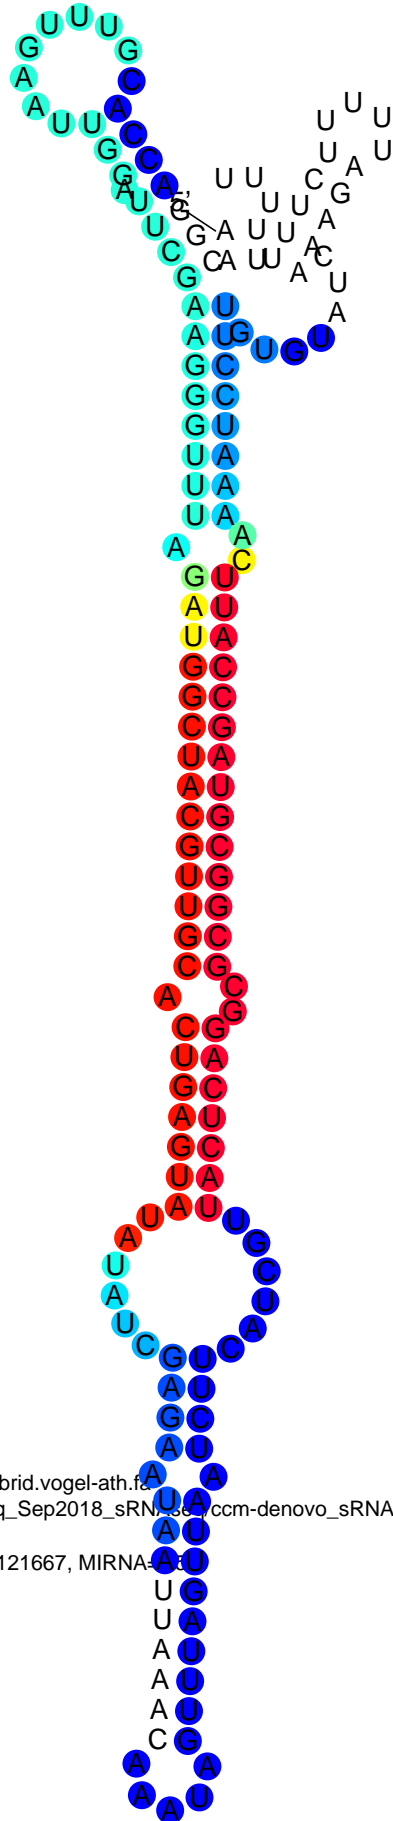

Genome: /Volumes/Keep/+genomes/hybrid\_genomes/hybrid.vogel-ath.f  
Alignments: /Volumes/Keep/+Cuscuta\_evolution/NextSeq\_Sep2018\_sRNA\_scaf...cmm-denovo\_sRNA\_annotation/02out-cca.hybrid.ShortStack/merged\_alig  
Location: Ccam0.32\_scaffold165:425824-425984 plus  
Name: SFs=SupFam\_122,SupFam\_190, SSCI=Cluster\_121667, MIRNA=...





Depth of Coverage

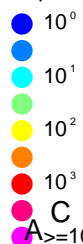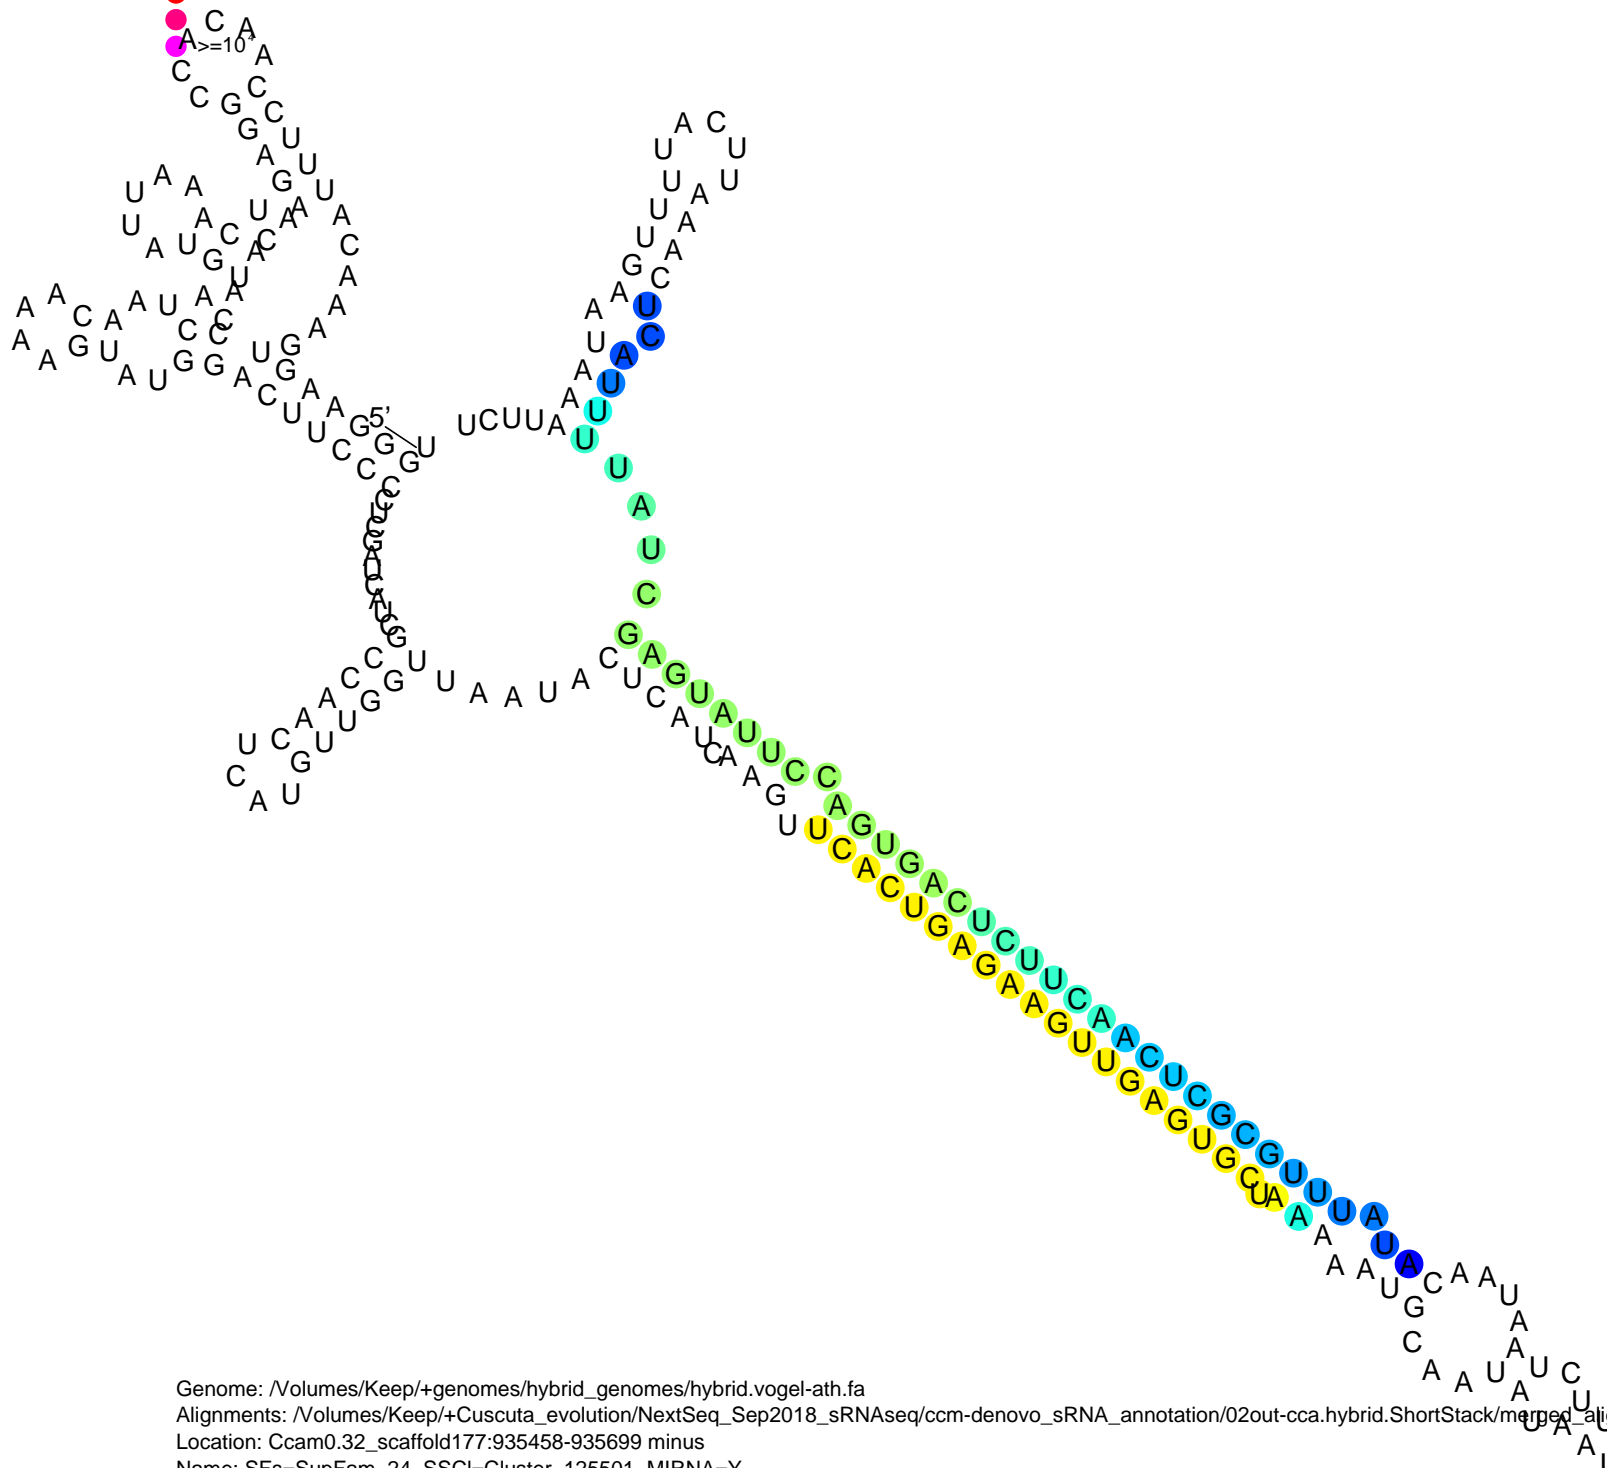

Genome: /Volumes/Keep/+genomes/hybrid\_genomes/hybrid.vogel-ath.fa

Alignments: /Volumes/Keep/+Cuscuta\_evolution/NextSeq\_Sep2018\_sRNAseq/ccm-denovo\_sRNA\_annotation/02out-cca.hybrid.ShortStack/merged\_alignments

Location: Ccam0.32\_scaffold177:935458-935699 minus

Name: SFs=SupFam\_24, SSCI=Cluster\_125501, MIRNA=Y



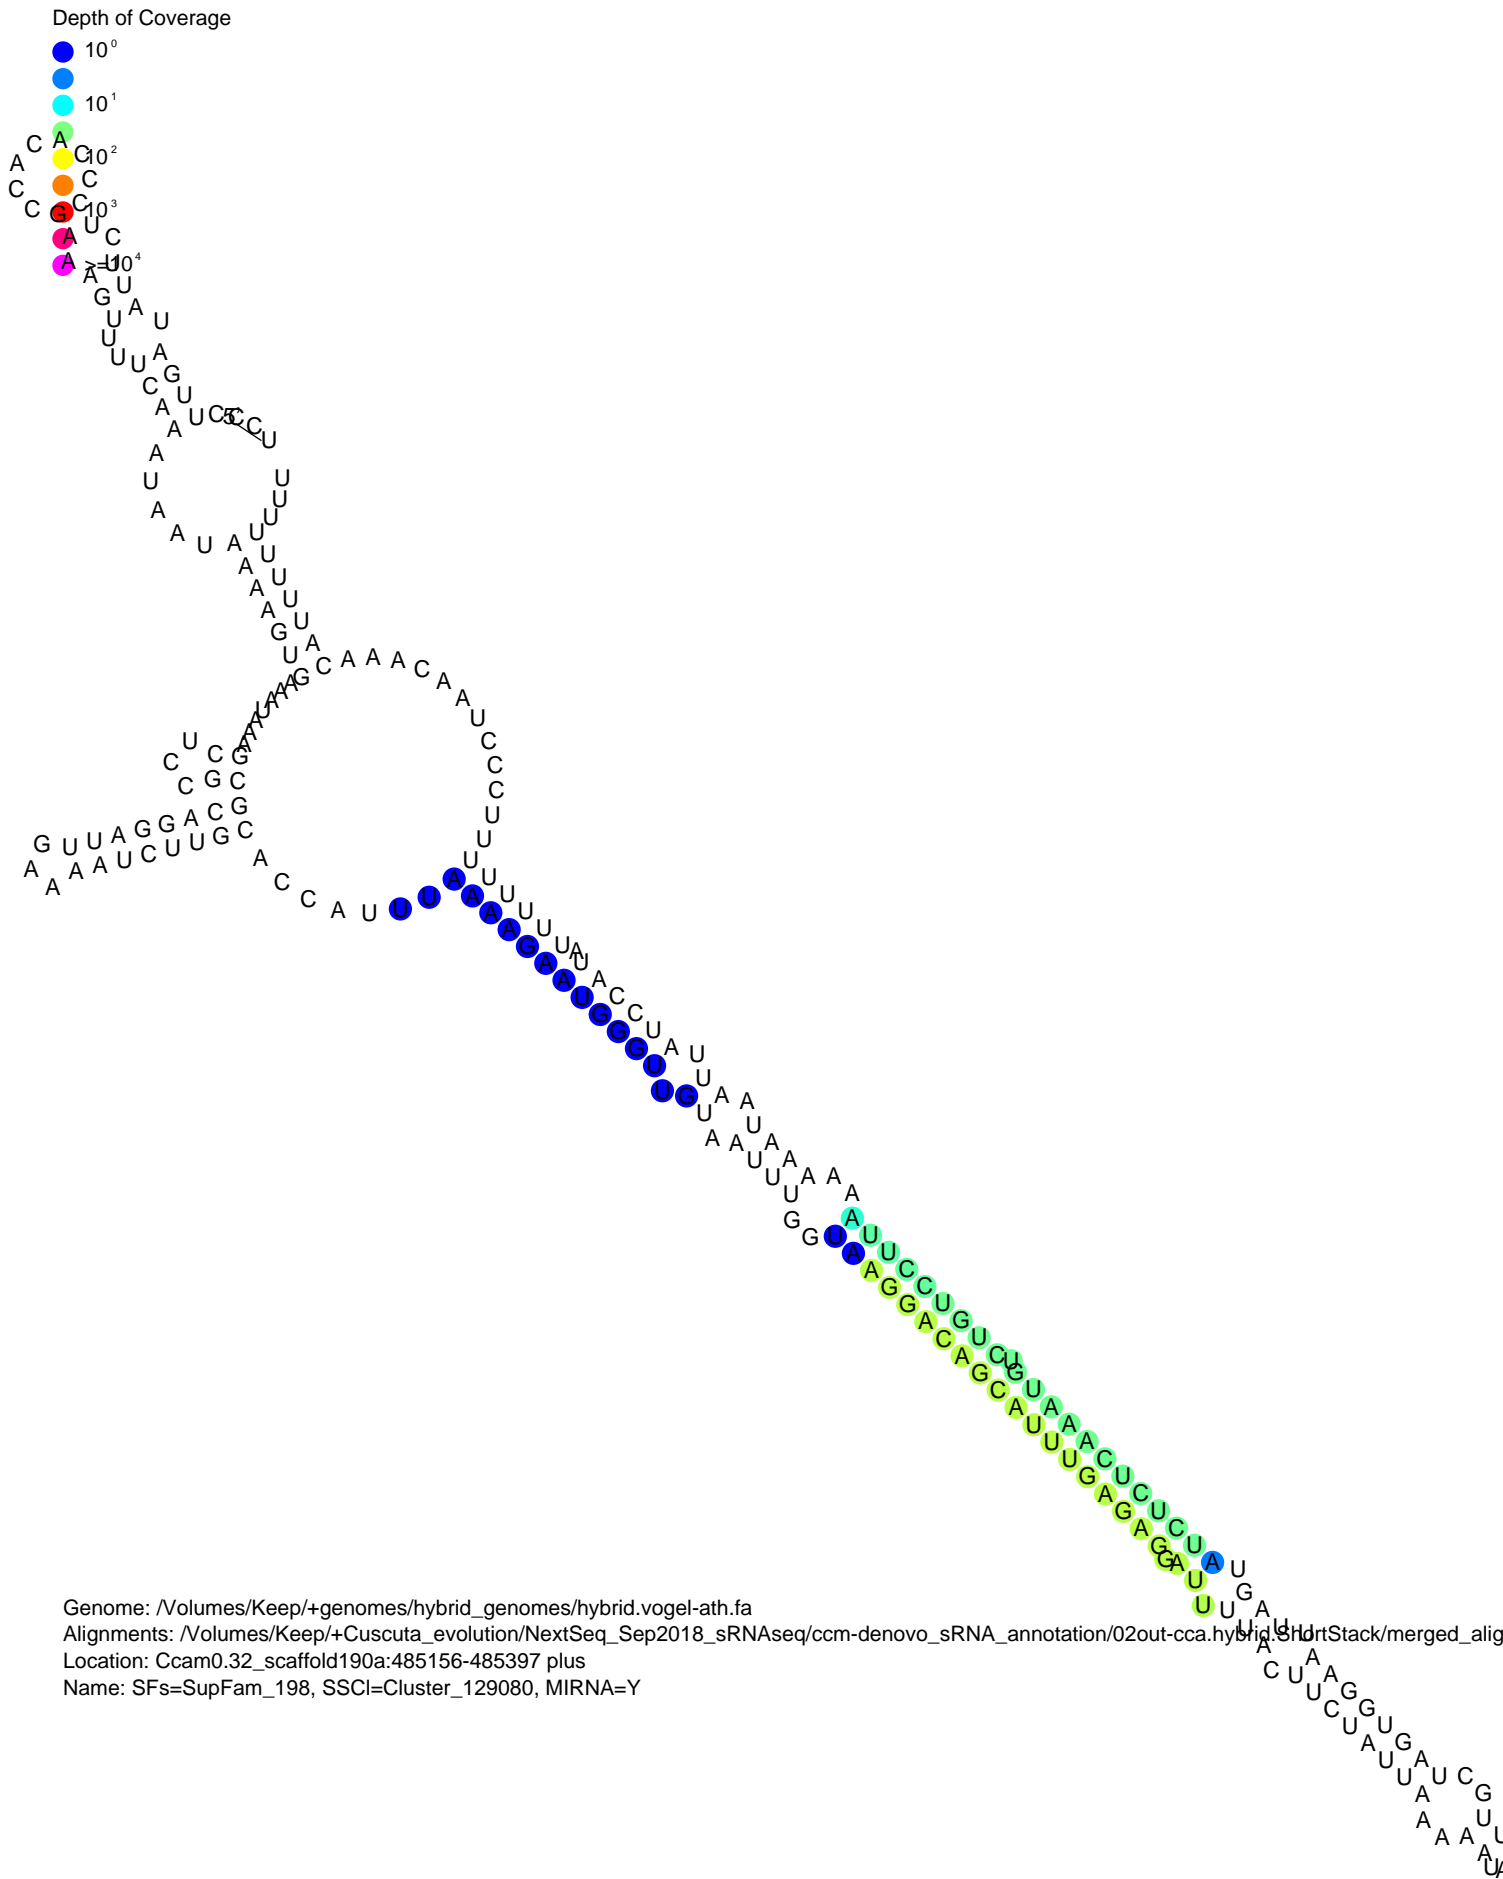

Depth of Coverage

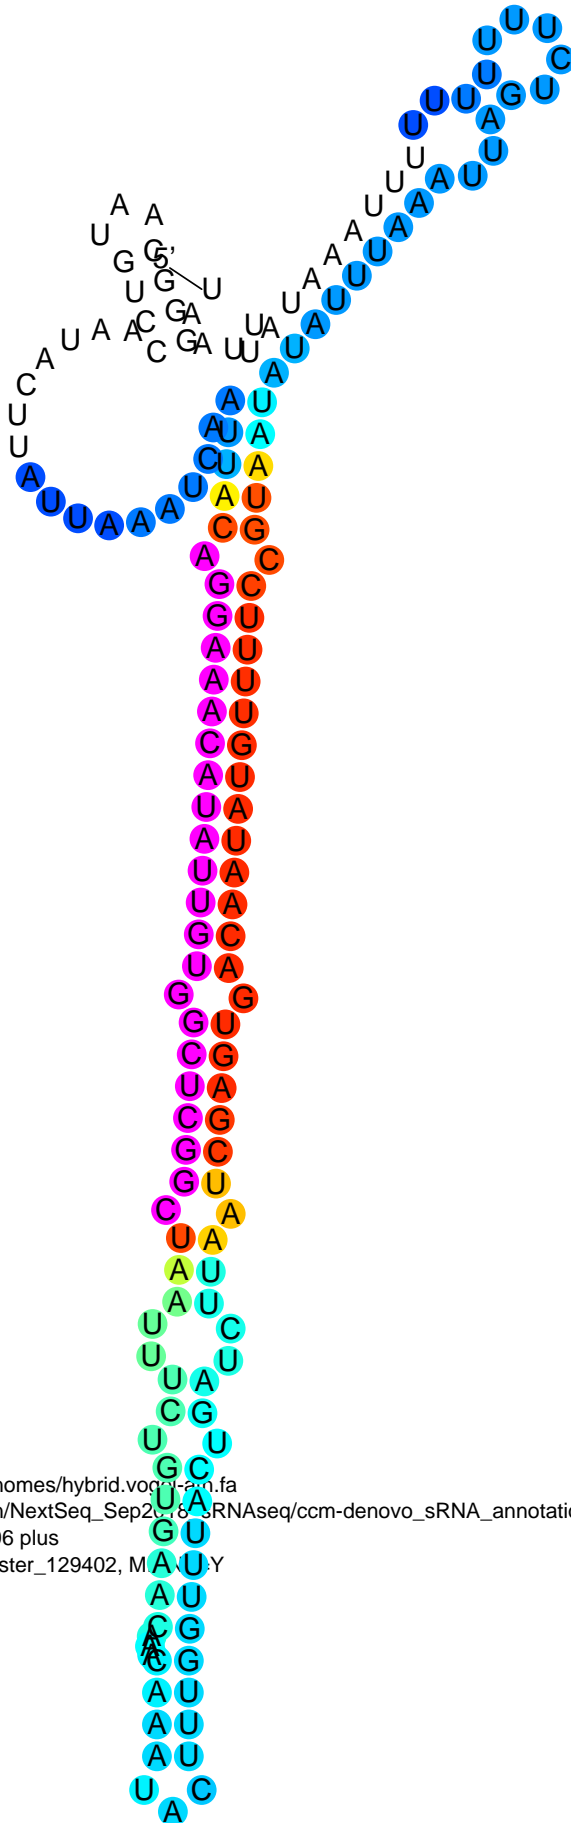

Genome: /Volumes/Keep/+genomes/hybrid\_genomes/hybrid.vcm-2.m.fa

Alignments: /Volumes/Keep/+Cuscuta\_evolution/NextSeq\_Sep2018/RRNAseq/cem-denovo\_sRNA\_annotation/02out-cca.hybrid.ShortStack/merged\_alignments

Location: Ccam0.32\_scaffold191:250338-250496 plus

Name: SFs=SupFam\_15,SupFam\_9, SSCI=Cluster\_129402, MFE=-10.85

Depth of Coverage

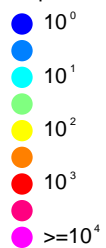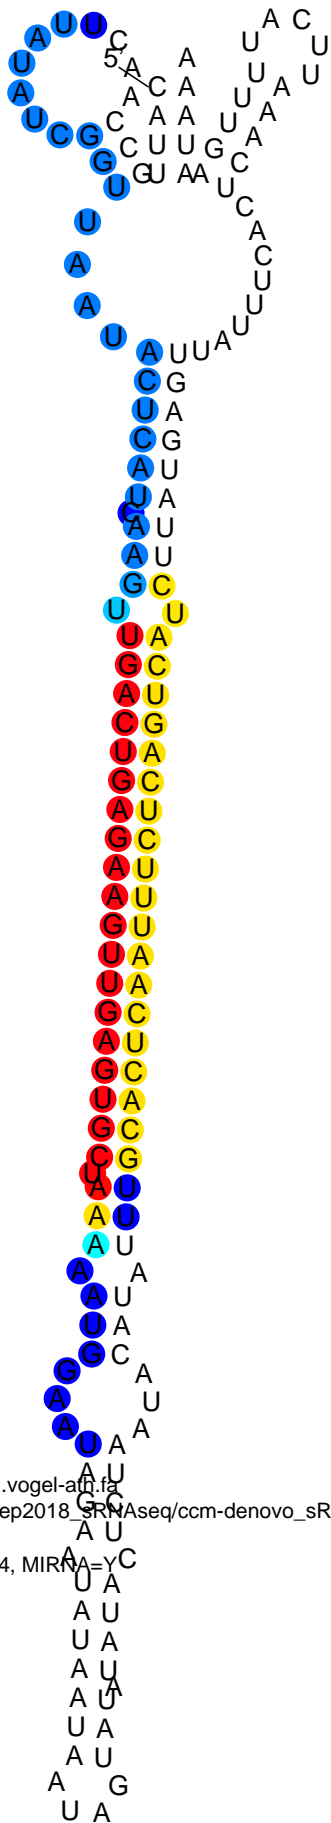

Genome: /Volumes/Keep/+genomes/hybrid\_genomes/hybrid.vogel-act.fa  
 Alignments: /Volumes/Keep/+Cuscuta\_evolution/NextSeq\_Sep2018\_SRNAseq/cdm-denovo\_sRNA\_annotation/02out-cca.hybrid.ShortStack/merged\_alignments

Location: Ccam0.32\_scaffold191:522948-523108 plus

Name: SFs=SupFam\_24,SupFam\_48, SSCI=Cluster\_129514, MIRNA=yc

U A U C  
 A U  
 U A  
 A U  
 A U  
 U A  
 A U  
 A G  
 U A



Depth of Coverage

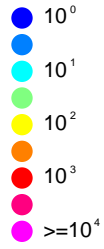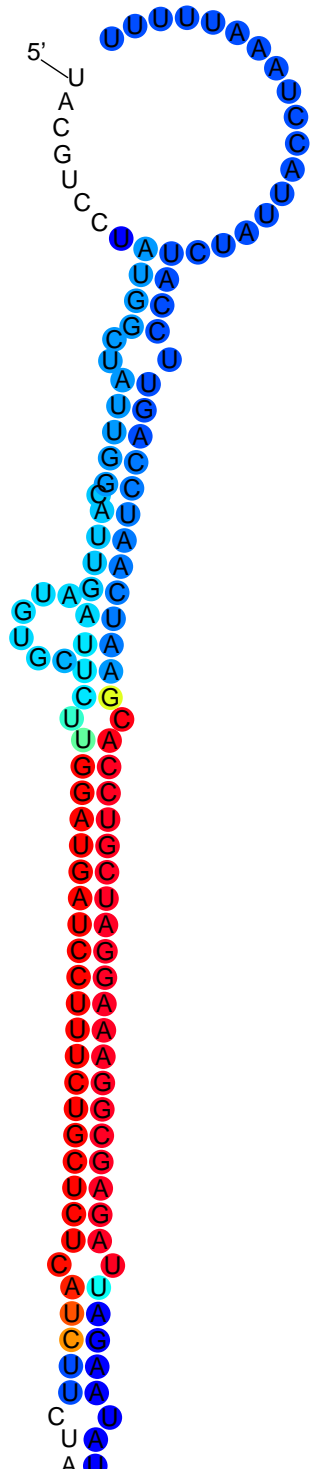

Genome: /Volumes/Keep/+genomes/hybrid\_genomes/hybrid\_vogel.math.fa

Alignments: /Volumes/Keep/+Cuscuta\_evolution/NextSeq\_Sep2018\_sRNASeq/ccm-denovo\_sRNA\_annotation/02out-cca.hybrid.ShortStack/merged\_alignments

Location: Ccam0.32\_scaffold196a:558326-558483 minus

Name: SFs=SupFam\_195,SupFam\_275, SSCI=Cluster\_130684, MIRNA=Y

```

A U A
A U A
U U
C G
U A
A U
A U
U C
A A A
    
```

Depth of Coverage

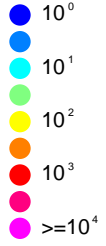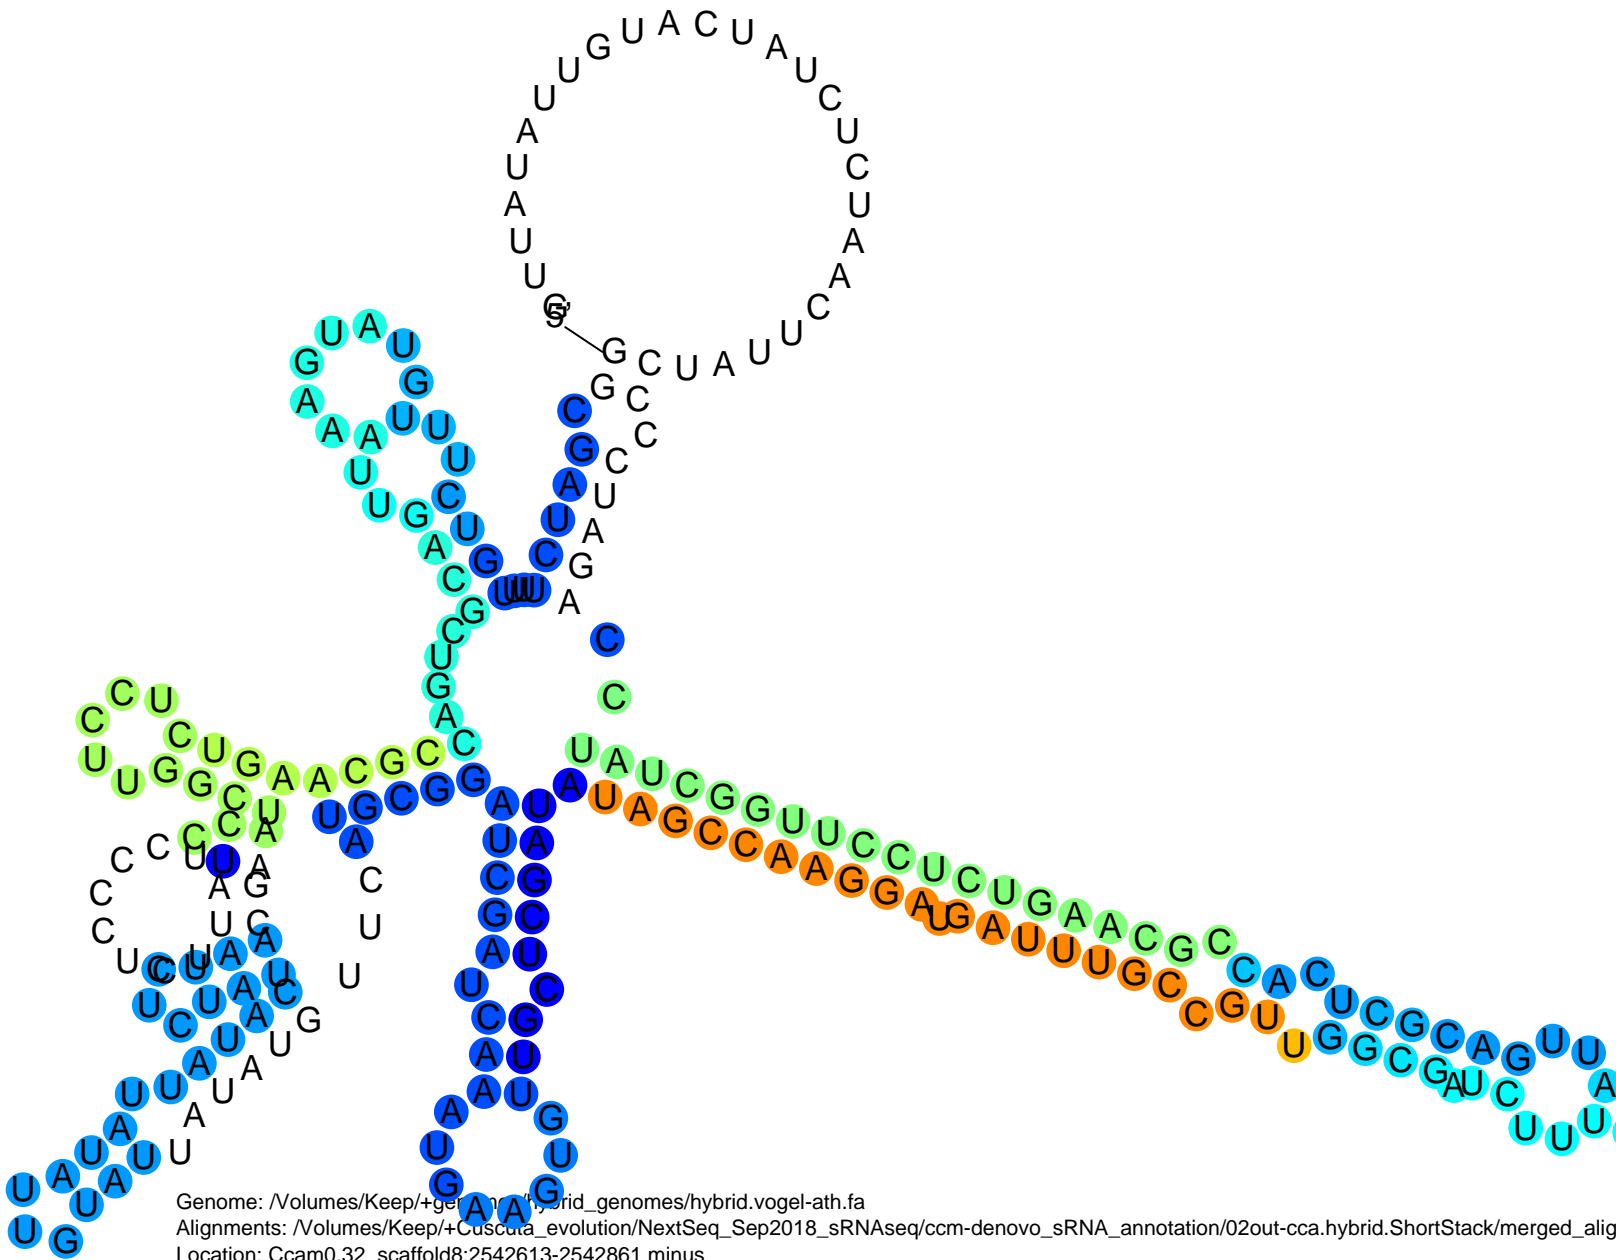

Genome: /Volumes/Keep/germany/1391/hybrid\_genomes/hybrid.vogel-ath.fa

Alignments: /Volumes/Keep/Cuscuta\_evolution/NextSeq\_Sep2018\_sRNAseq/ccm-denovo\_sRNA\_annotation/02out-cca.hybrid.ShortStack/merged\_alignments

Location: Ccam0.32\_scaffold8:2542613-2542861 minus

Name: SFs=SupFam\_333,SupFam\_72, SSCI=Cluster\_13071, MIRNA=N5

Depth of Coverage

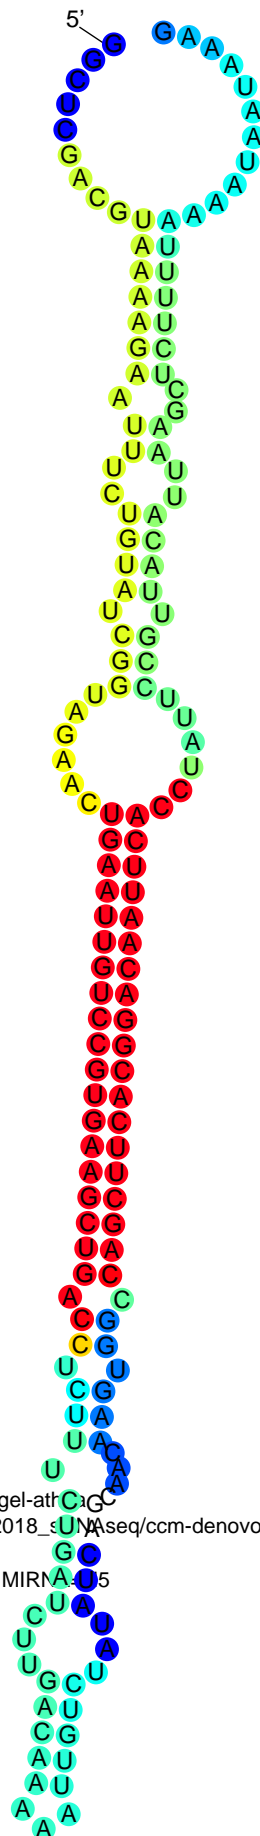

Genome: /Volumes/Keep/+genomes/hybrid\_genomes/hybrid.vogel-atl  
Alignments: /Volumes/Keep/+Cuscuta\_evolution/NextSeq\_Sep2018\_  
Location: Ccam0.32\_scaffold203:239440-239598 plus  
Name: SFs=SupFam\_65,SupFam\_271, SSCI=Cluster\_132530, MIRNA-15

Depth of Coverage

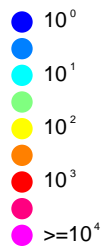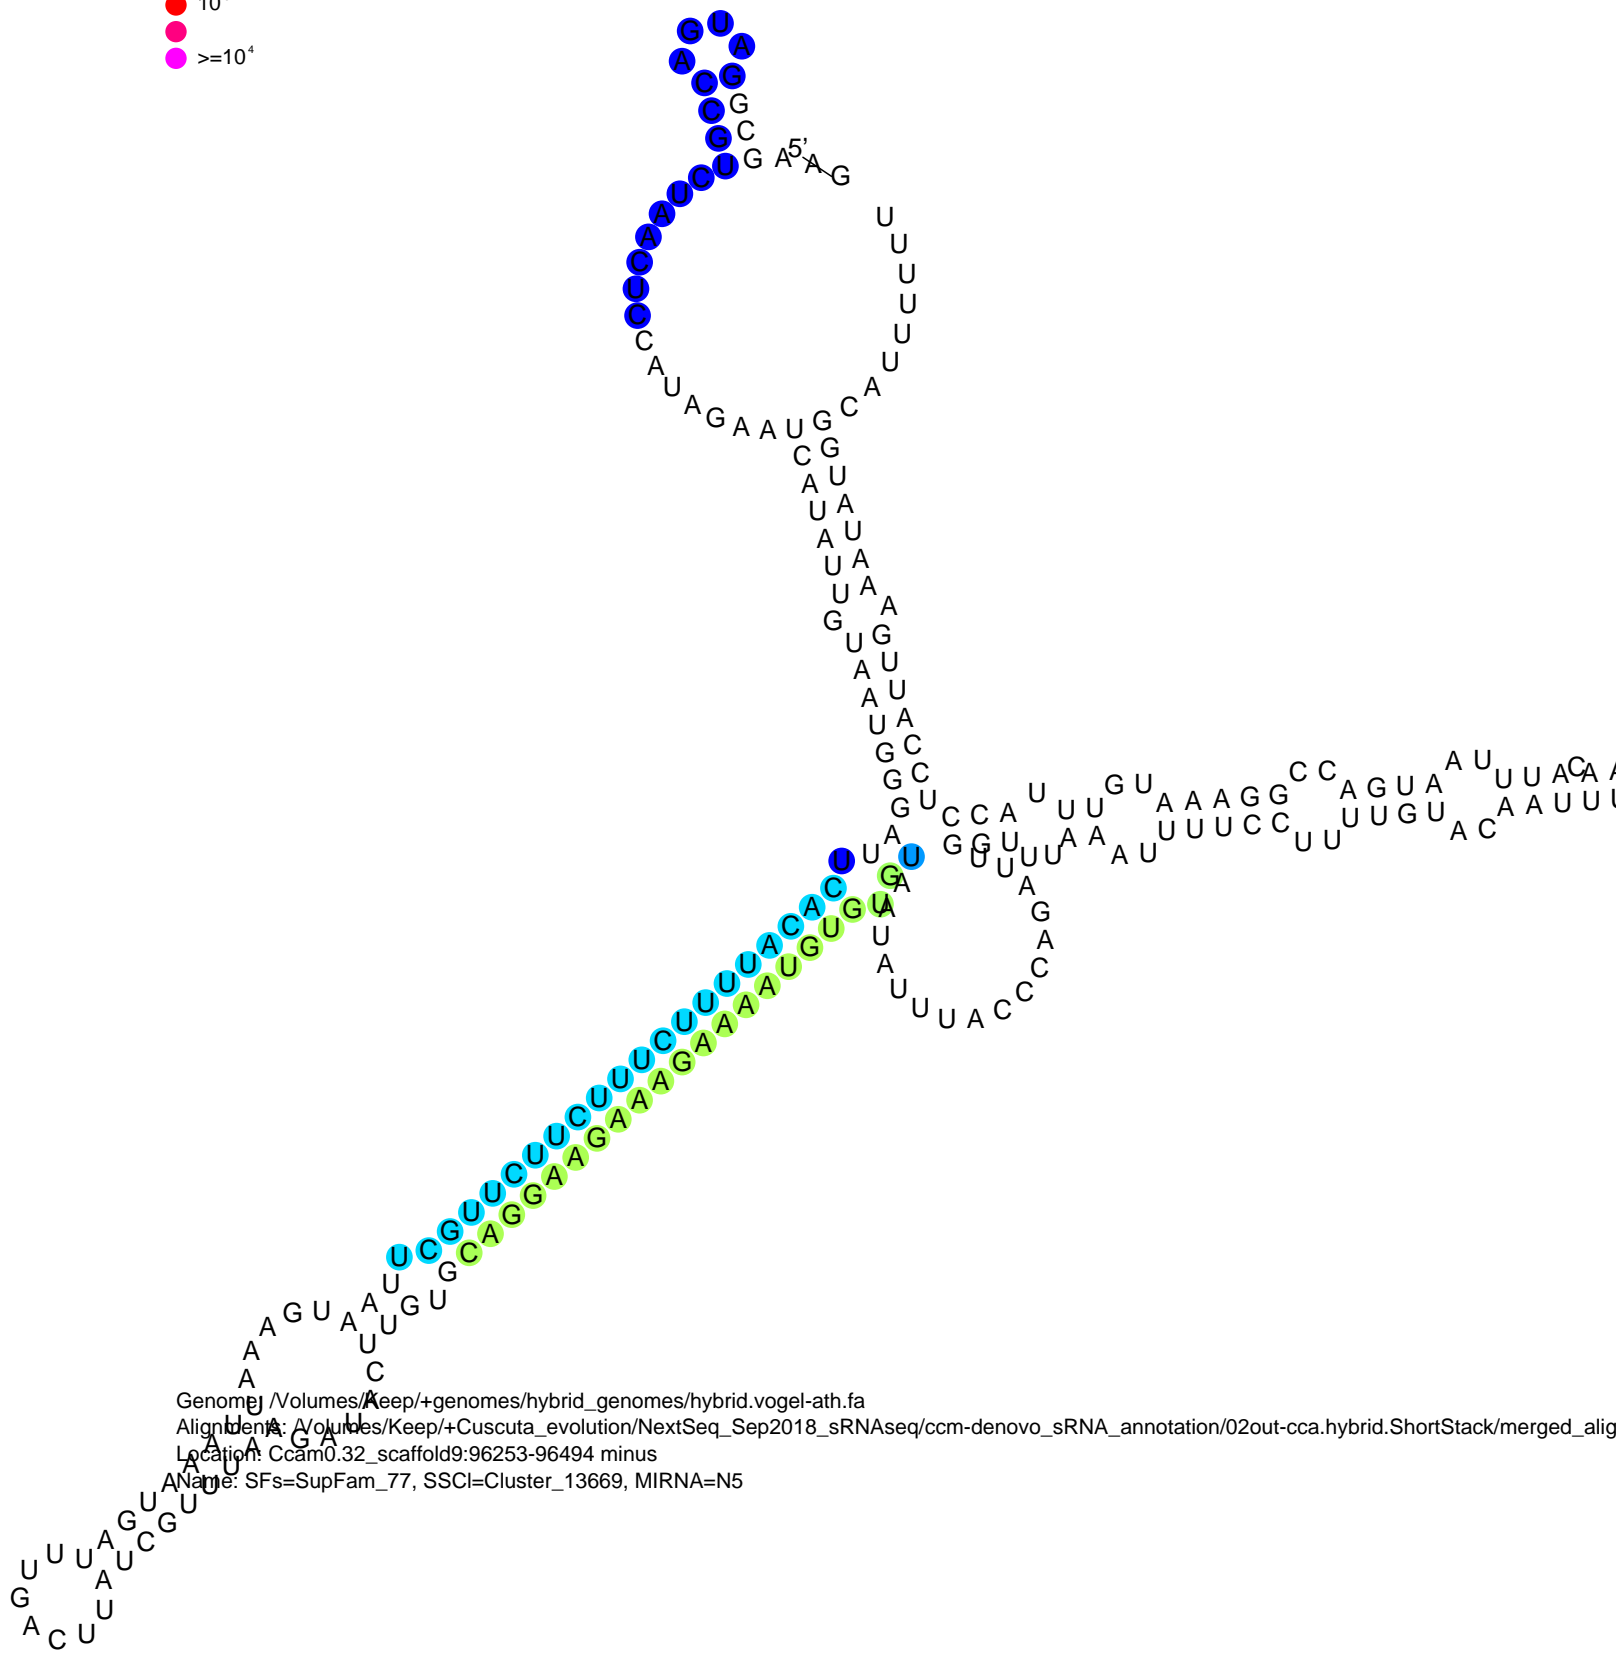



Depth of Coverage

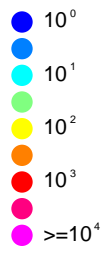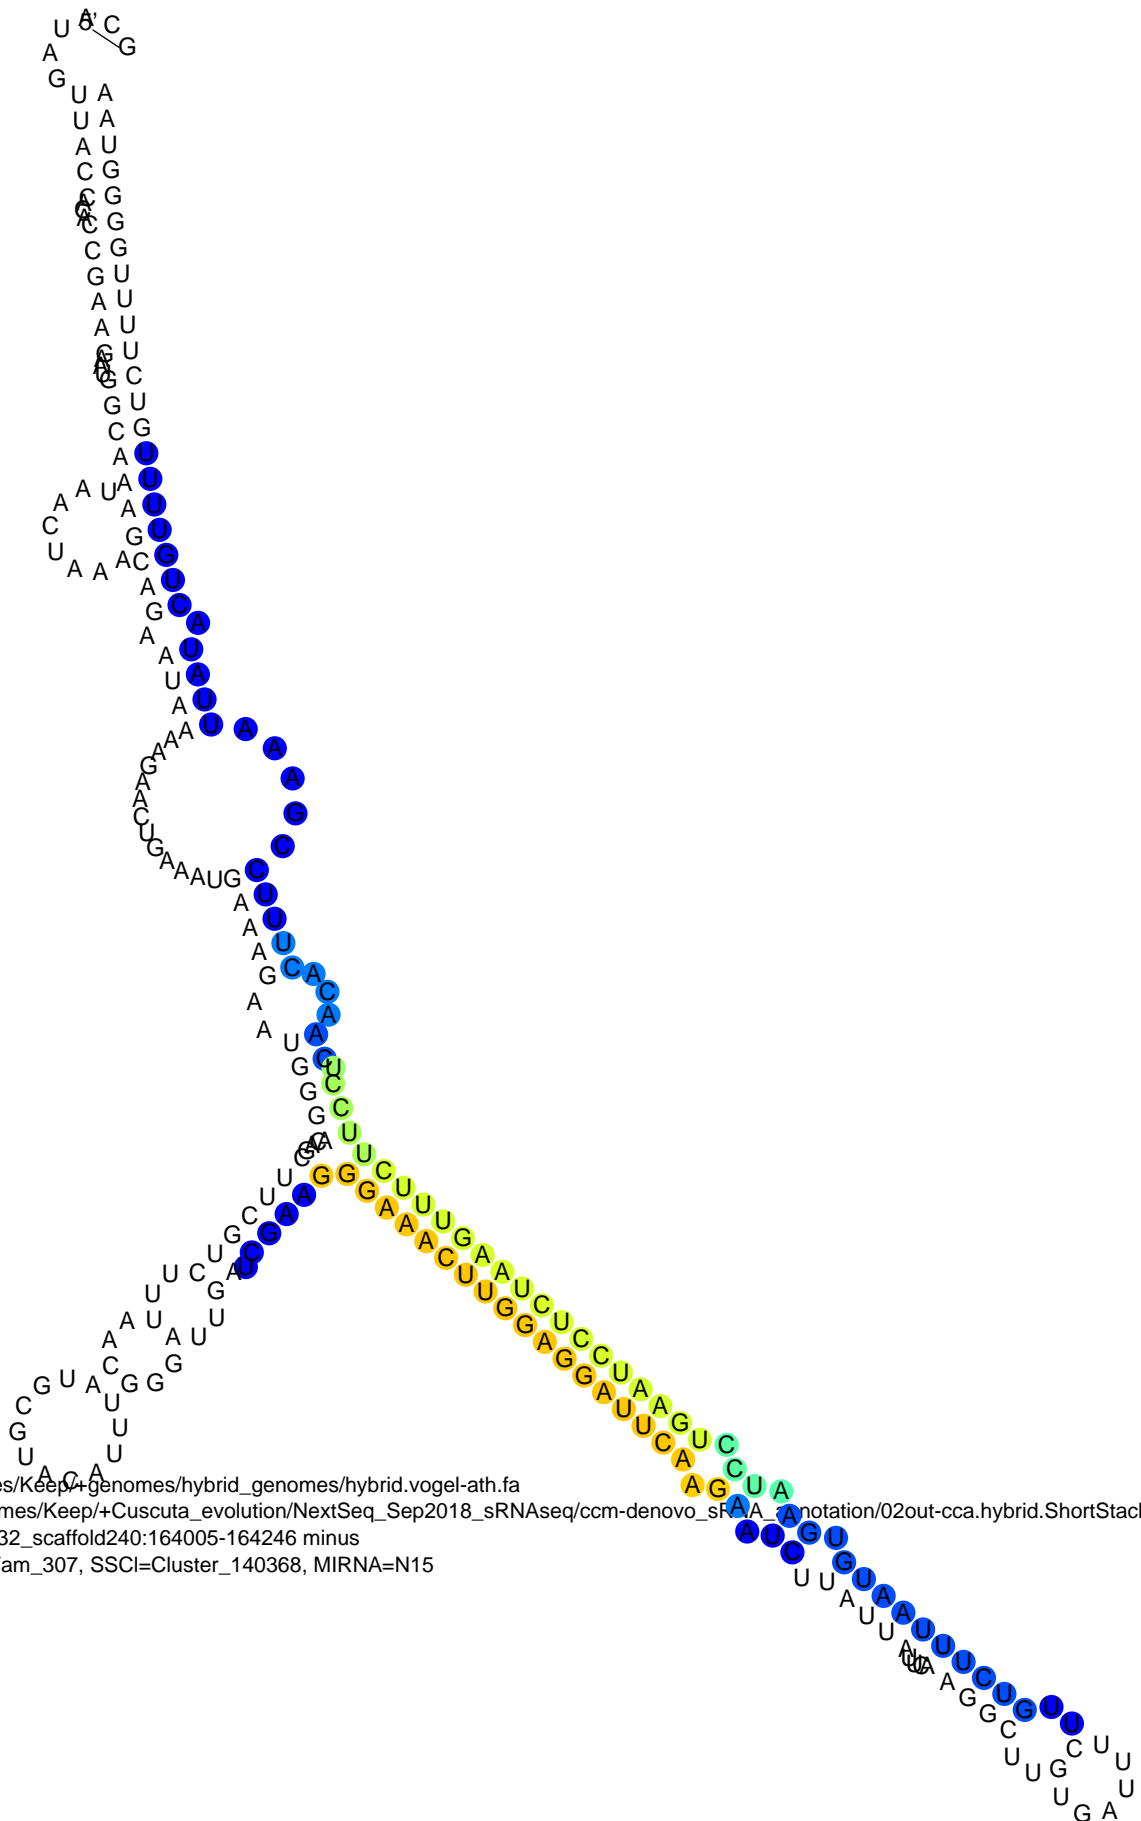

Genome: /Volumes/Keep+/genomes/hybrid\_genomes/hybrid.vogel-ath.fa

Alignments: /Volumes/Keep+/Cuscuta\_evolution/NextSeq\_Sep2018\_sRNAseq/cem-denovo\_sFA\_7notation/02out-cca.hybrid.ShortStack/merged\_alig

Location: Ccam0.32\_scaffold240:164005-164246 minus

Name: SFs=SupFam\_307, SSCI=Cluster\_140368, MIRNA=N15













Depth of Coverage

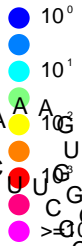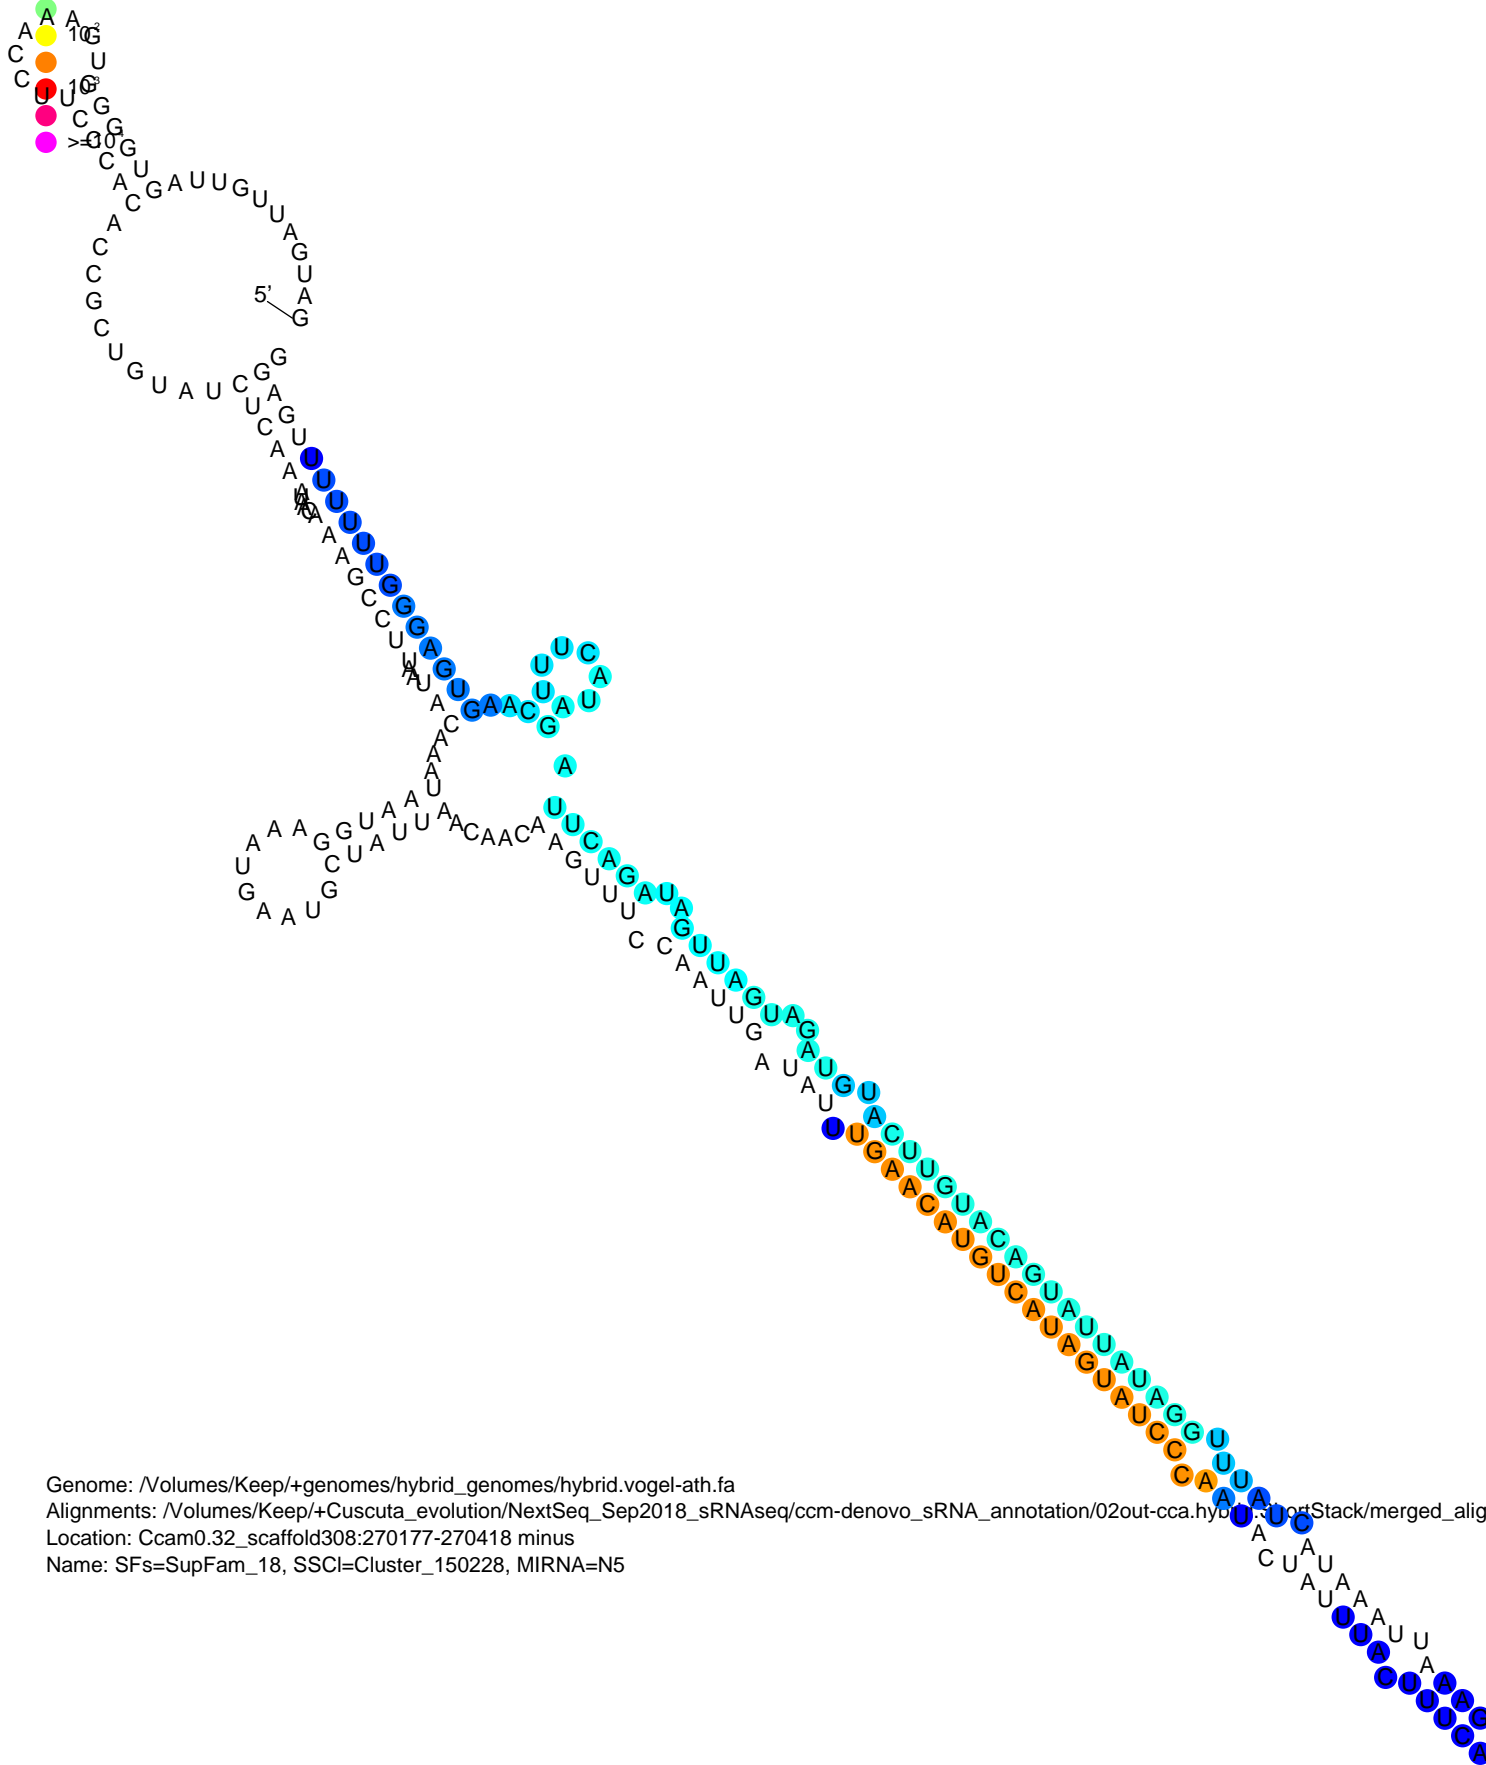

Genome: /Volumes/Keep/+genomes/hybrid\_genomes/hybrid.vogel-ath.fa

Alignments: /Volumes/Keep/+Cuscuta\_evolution/NextSeq\_Sep2018\_sRNAseq/cem-denovo\_sRNA\_annotation/02out-cca.hyb.../merged\_align

Location: Ccam0.32\_scaffold308:270177-270418 minus

Name: SFs=SupFam\_18, SSCI=Cluster\_150228, MIRNA=N5







Depth of Coverage

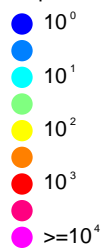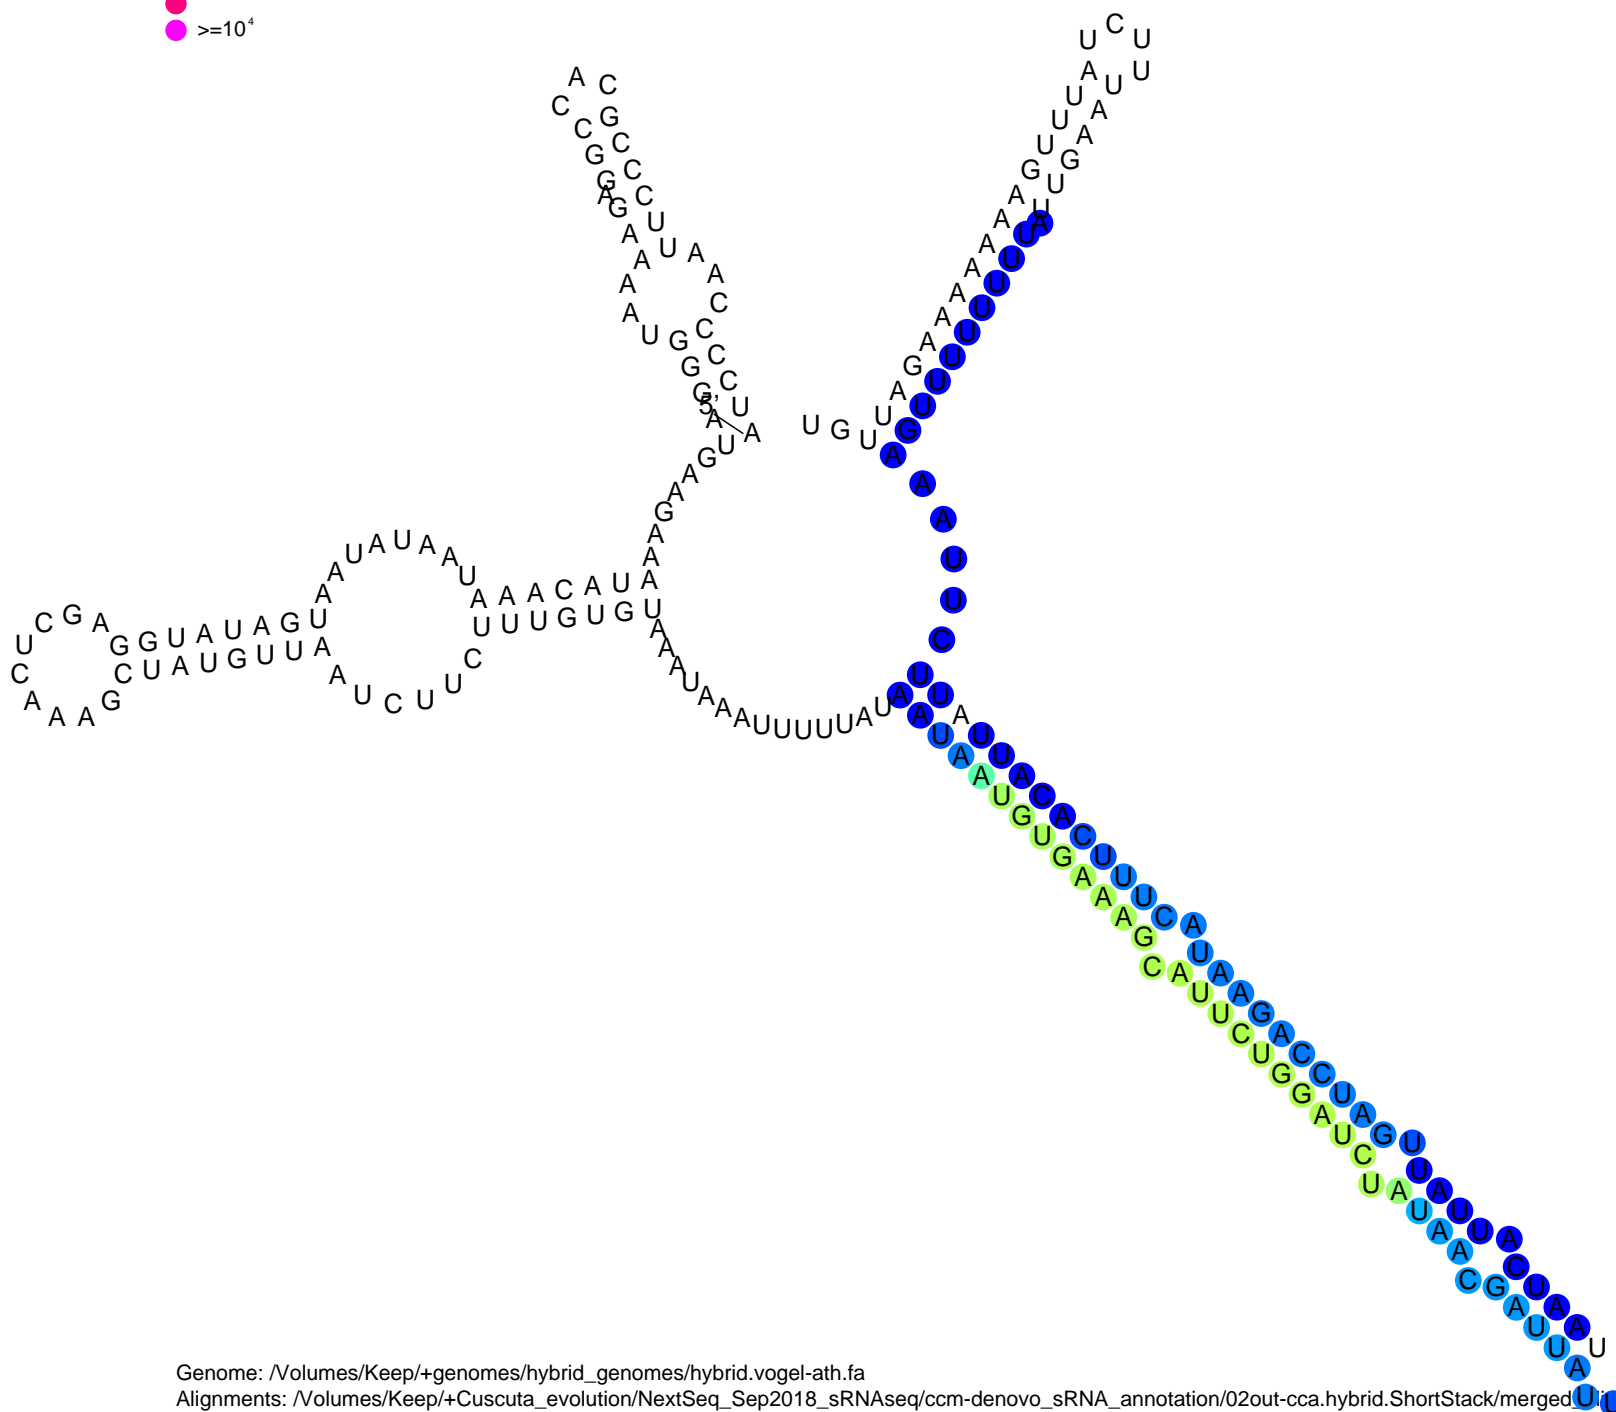

Genome: /Volumes/Keep/+genomes/hybrid\_genomes/hybrid.vogel-ath.fa

Alignments: /Volumes/Keep/+Cuscuta\_evolution/NextSeq\_Sep2018\_sRNAseq/cem-denovo\_sRNA\_annotation/02out-cca.hybrid.ShortStack/merged

Location: Ccam0.32\_scaffold318:83484-83725 plus

Name: SFs=SupFam\_196, SSCI=Cluster\_151171, MIRNA=N5





Depth of Coverage

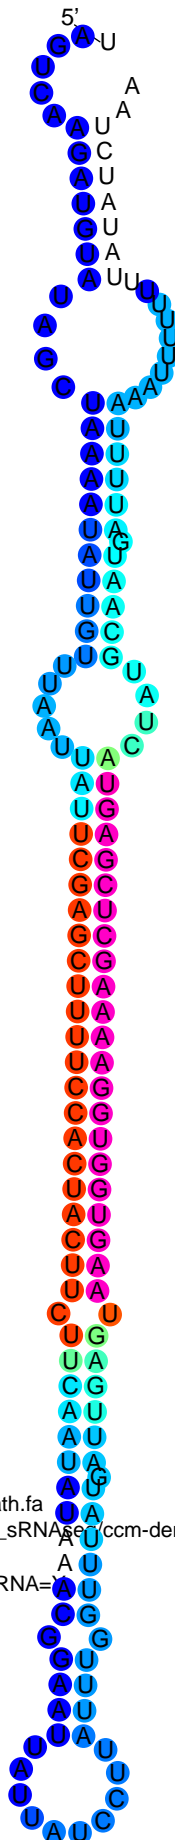

Genome: /Volumes/Keep/+genomes/hybrid\_genomes/hybrid.vogel-ath.fa

Alignments: /Volumes/Keep/+Cuscuta\_evolution/NextSeq\_Sep2018\_sRNAseq\_ccm-denovo\_sRNA\_annotation/02out-cca.hybrid.ShortStack/merged\_alignments

Location: Ccam0.32\_scaffold425:242866-243023 minus

Name: SFs=SupFam\_263,SupFam\_194, SSCI=Cluster\_158194, MIRNA=mir158194



Depth of Coverage

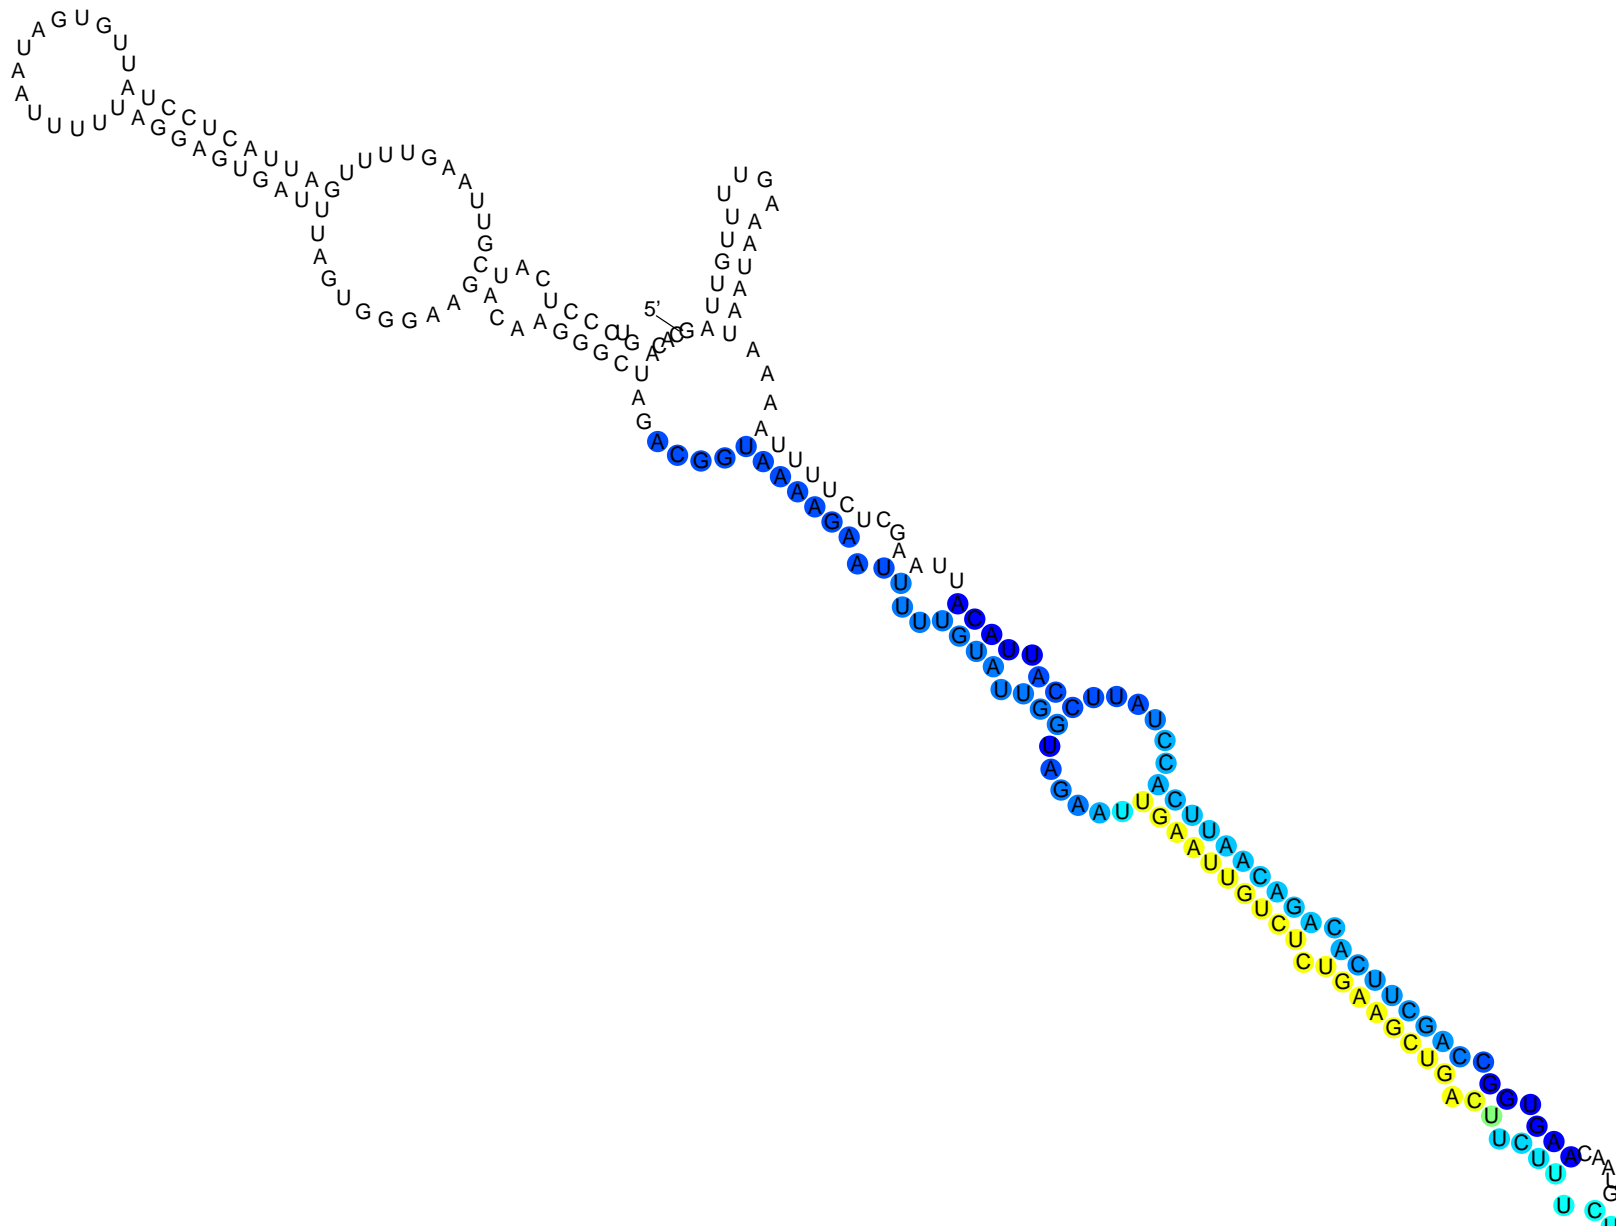

Genome: /Volumes/Keep/+genomes/hybrid\_genomes/hybrid.vogel-ath.fa

Alignments: /Volumes/Keep/+Cuscuta\_evolution/NextSeq\_Sep2018\_sRNAseq/cem-denovo\_sRNA\_annotation/02out-cca.hybrid.ShortStack/merged\_alignments

Location: Ccam0.32\_scaffold502:67624-67866 minus

Name: SFs=SupFam\_65, SSCI=Cluster\_160810, MIRNA=Y

Depth of Coverage

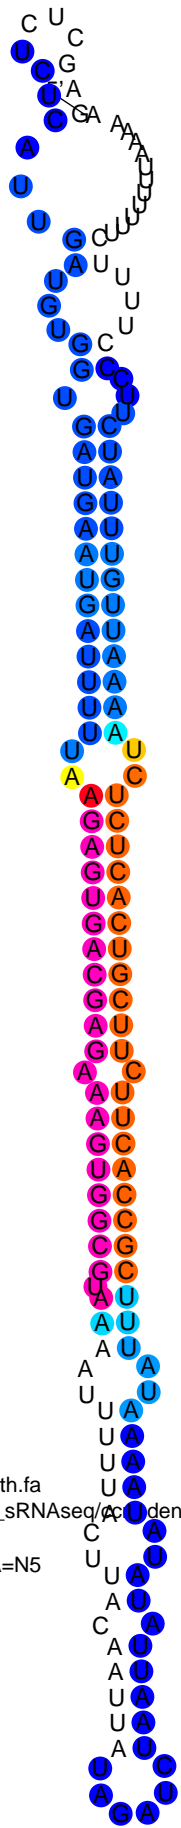

Genome: /Volumes/Keep/+genomes/hybrid\_genomes/hybrid.vogel-ath.fa

Alignments: /Volumes/Keep/+Cuscuta\_evolution/NextSeq\_Sep2018\_sRNAseq/ncu\_denovo\_sRNA\_annotation/02out-cca.hybrid.ShortStack/merged\_alignments

Location: Ccam0.32\_scaffold11:906201-906360 minus

Name: SFs=SupFam\_73,SupFam\_12, SSCI=Cluster\_16821, MIRNA=N5











Depth of Coverage

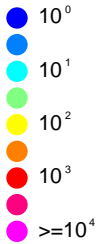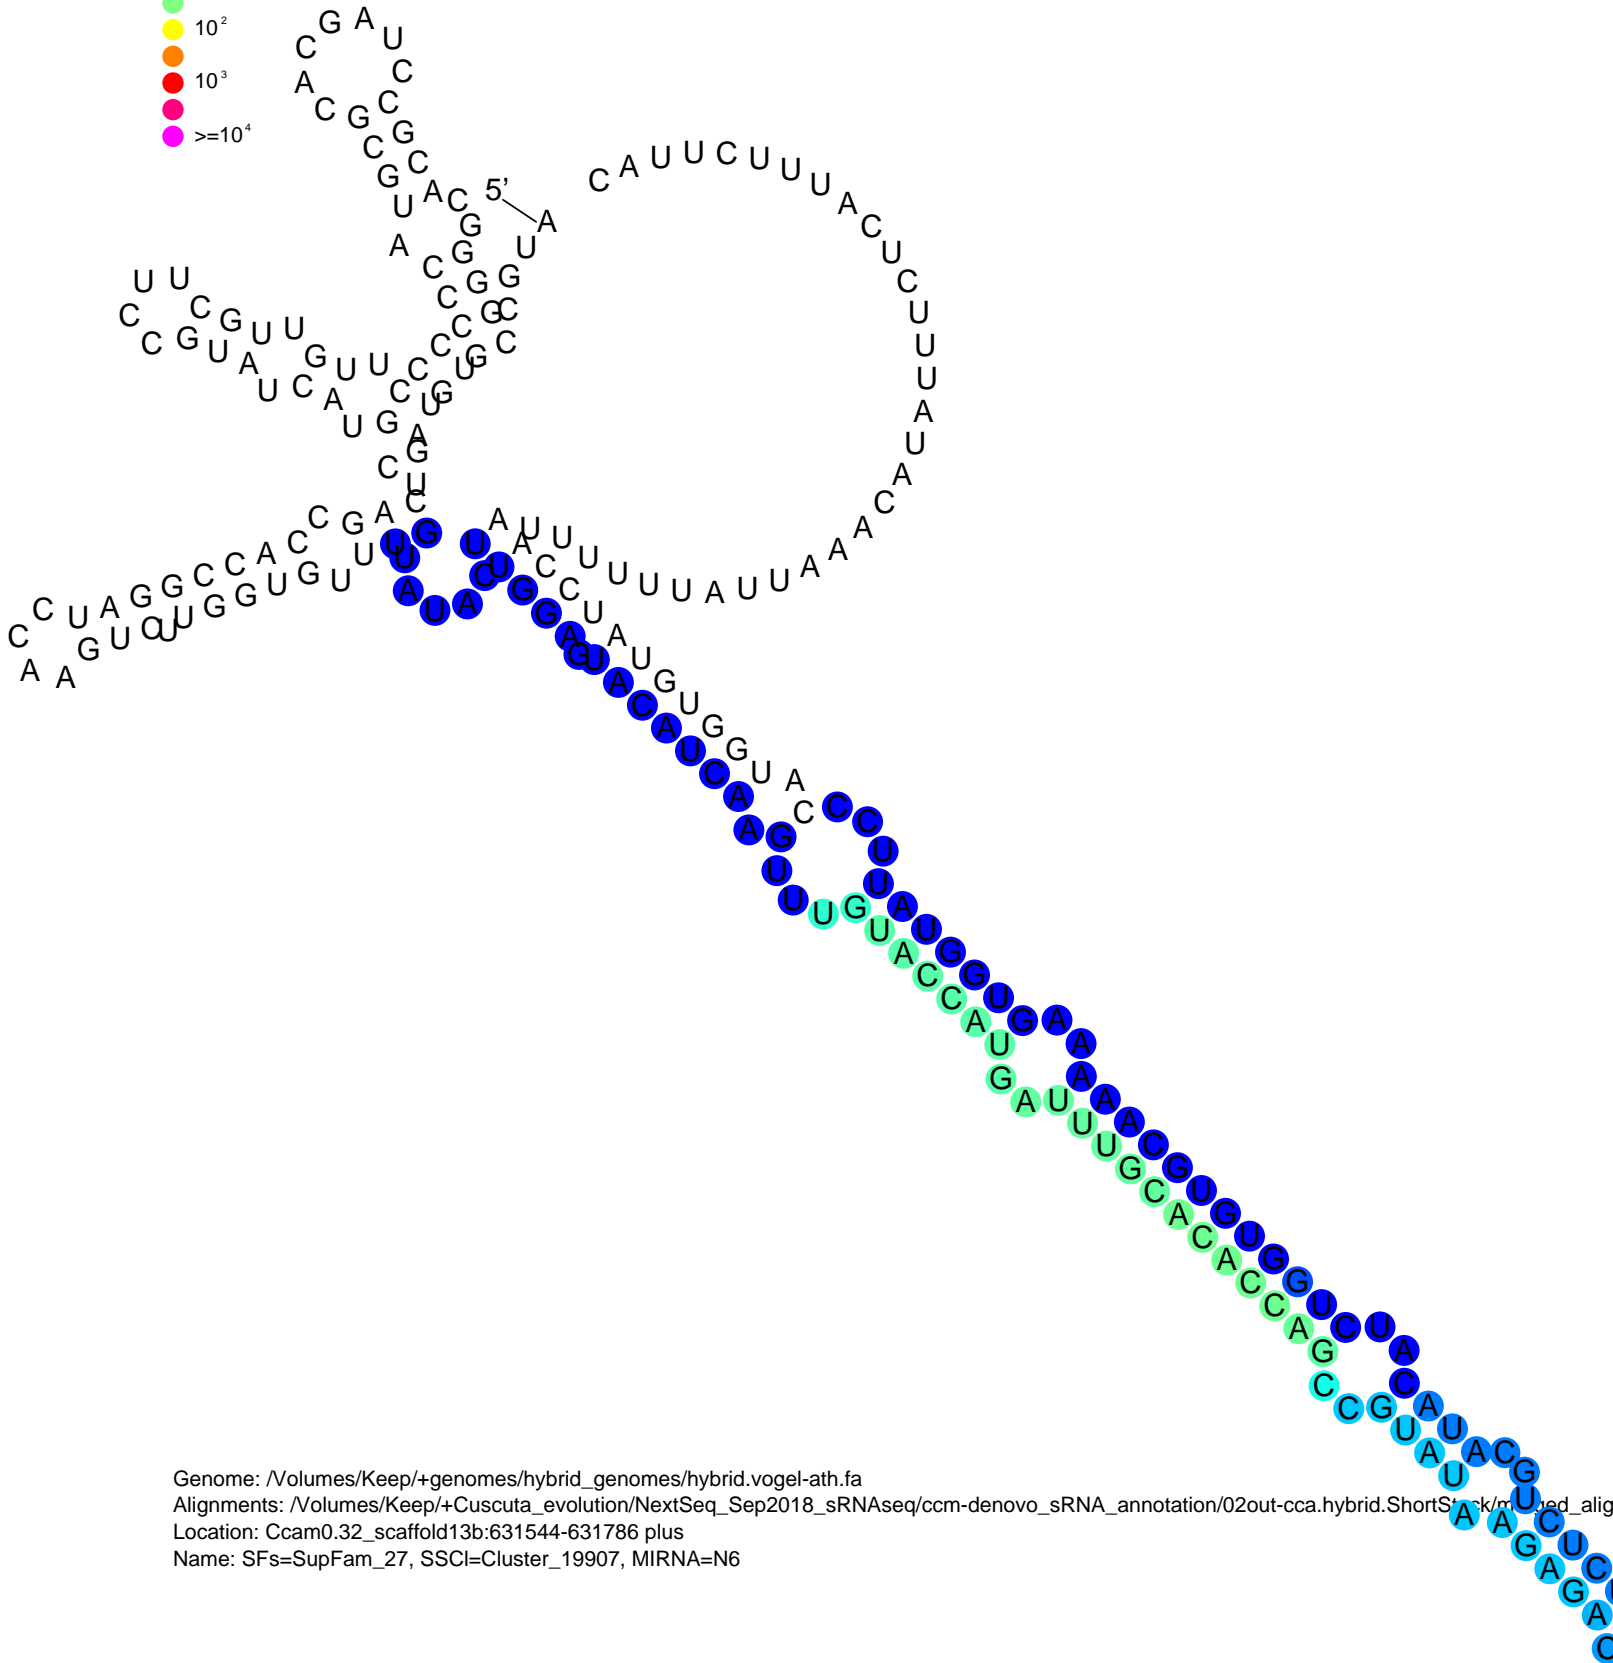

Genome: /Volumes/Keep/+genomes/hybrid\_genomes/hybrid.vogel-ath.fa  
Alignments: /Volumes/Keep/+Cuscuta\_evolution/NextSeq\_Sep2018\_sRNAseq/ccm-denovo\_sRNA\_annotation/02out-cca.hybrid.ShortStack/mapped\_alignments  
Location: Ccam0.32\_scaffold13b:631544-631786 plus  
Name: SFs=SupFam\_27, SSCI=Cluster\_19907, MIRNA=N6

Depth of Coverage

- 10<sup>0</sup>
- 10<sup>1</sup>
- 10<sup>2</sup>
- 10<sup>3</sup>
- >=10<sup>4</sup>

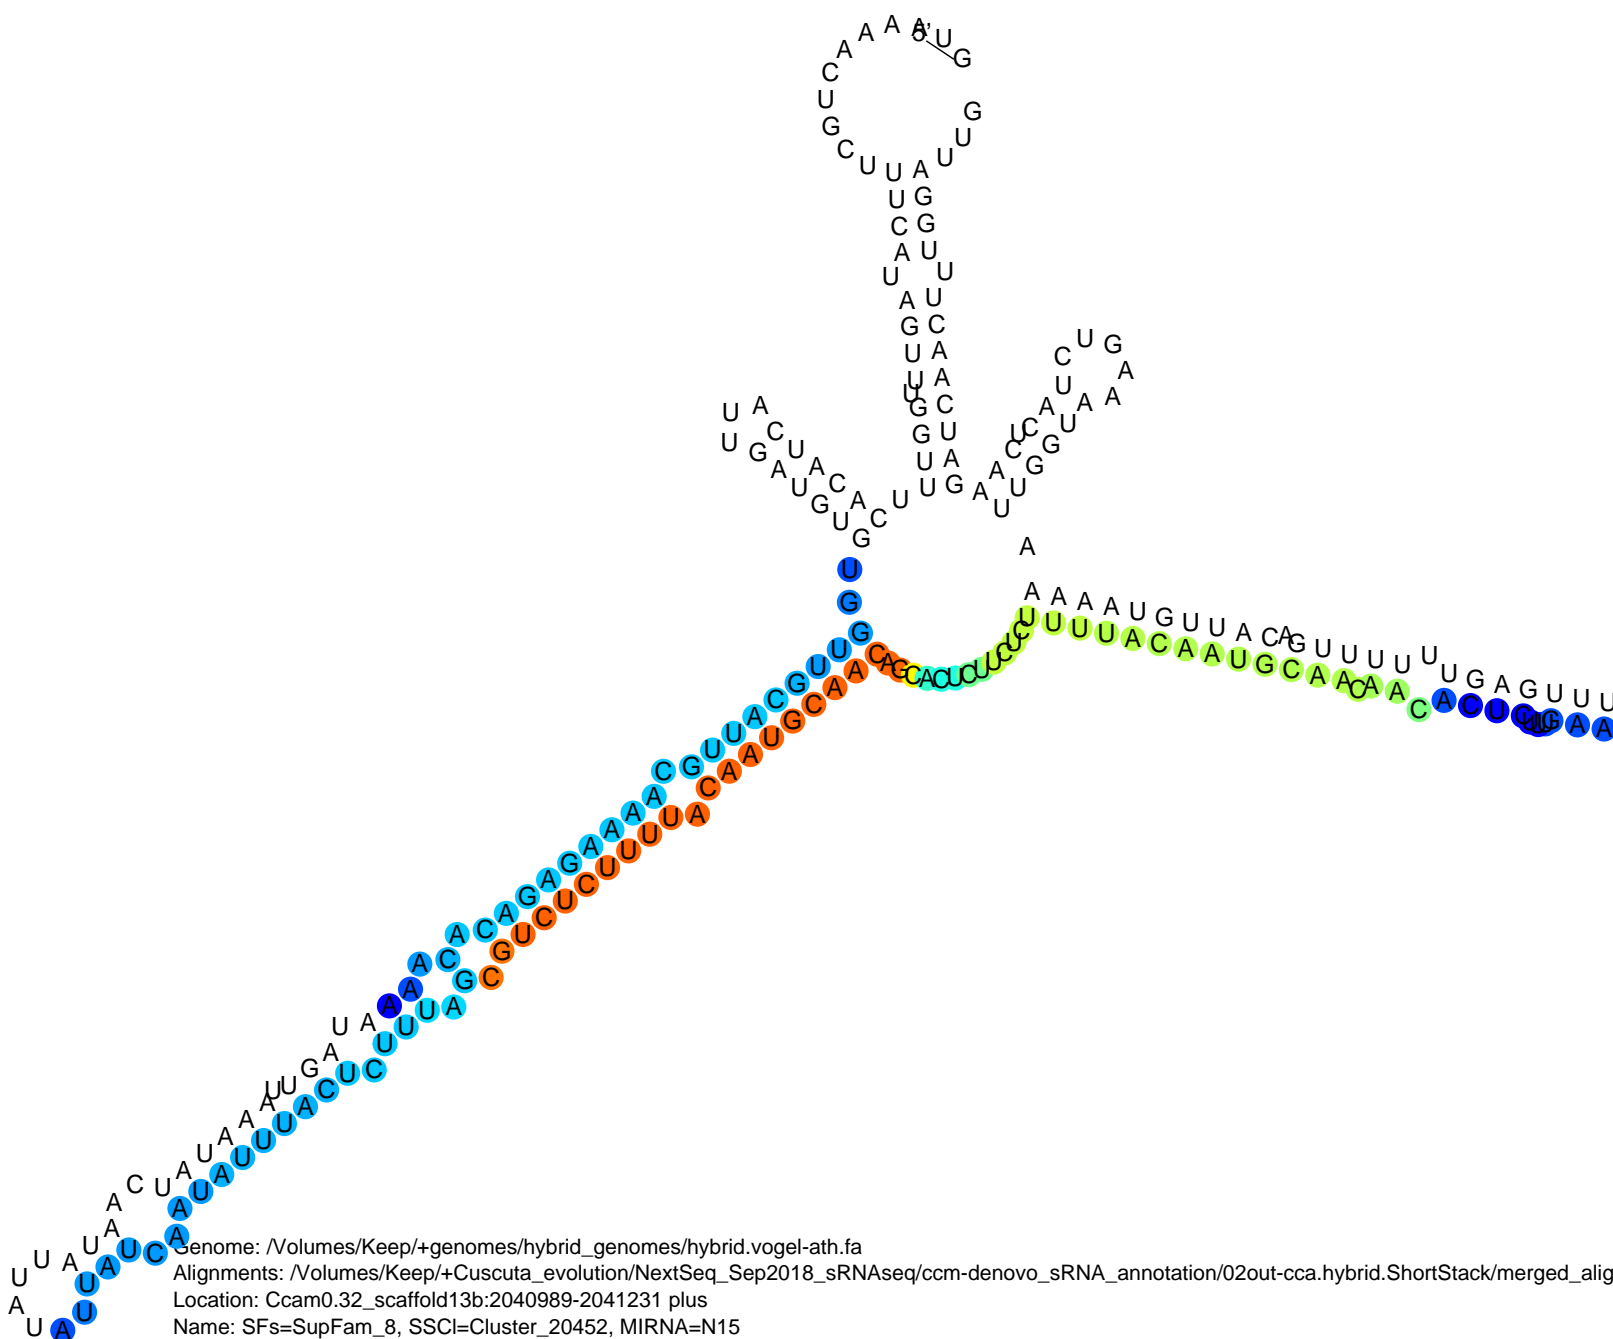



Depth of Coverage

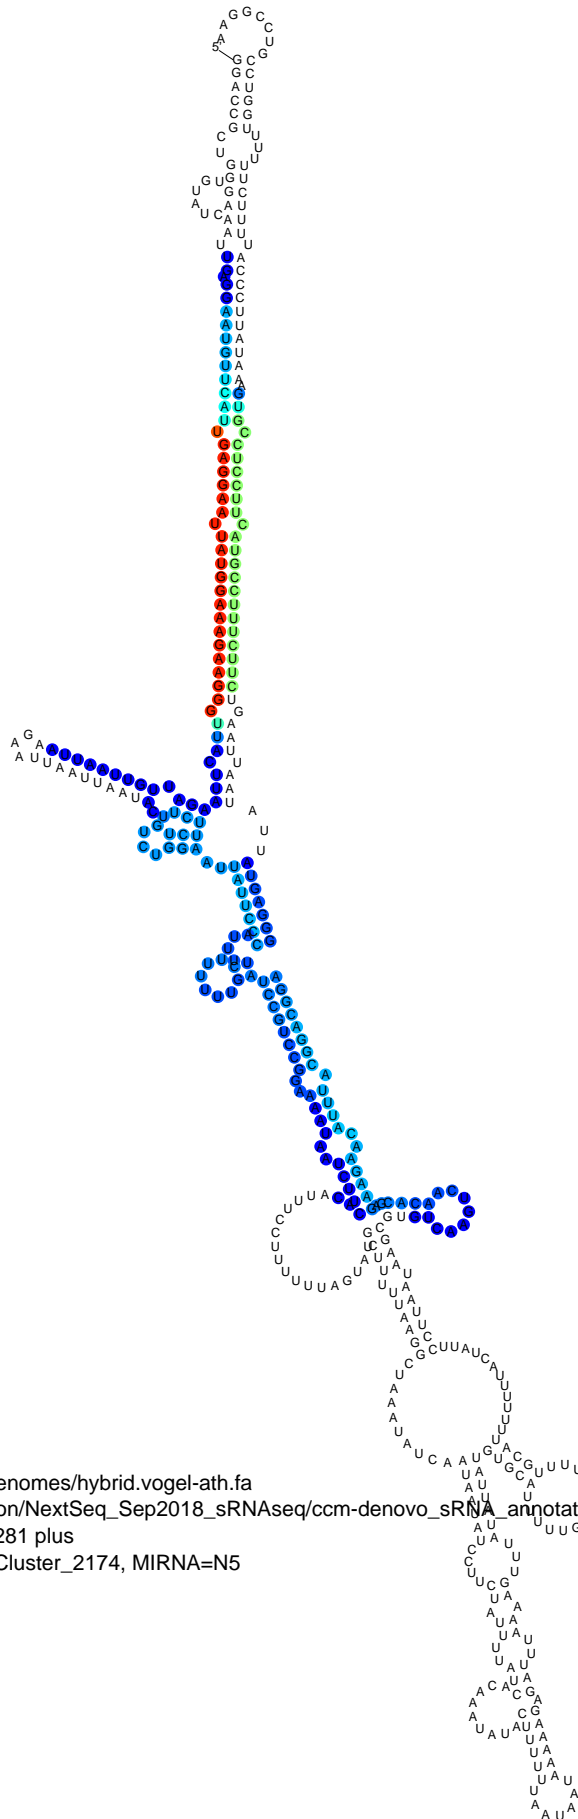

Genome: /Volumes/Keep/+genomes/hybrid\_genomes/hybrid.vogel-ath.fa

Alignments: /Volumes/Keep/+Cuscuta\_evolution/NextSeq\_Sep2018\_sRNAseq/cem-denovo\_sRNA\_annotation/02out-cca.hybrid.ShortStack/merged\_alignments

Location: Ccam0.32\_scaffold1:5098862-5099281 plus

Name: SFs=SupFam\_3,SupFam\_265, SSCI=Cluster\_2174, MIRNA=N5

Depth of Coverage

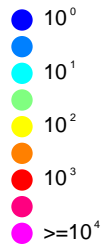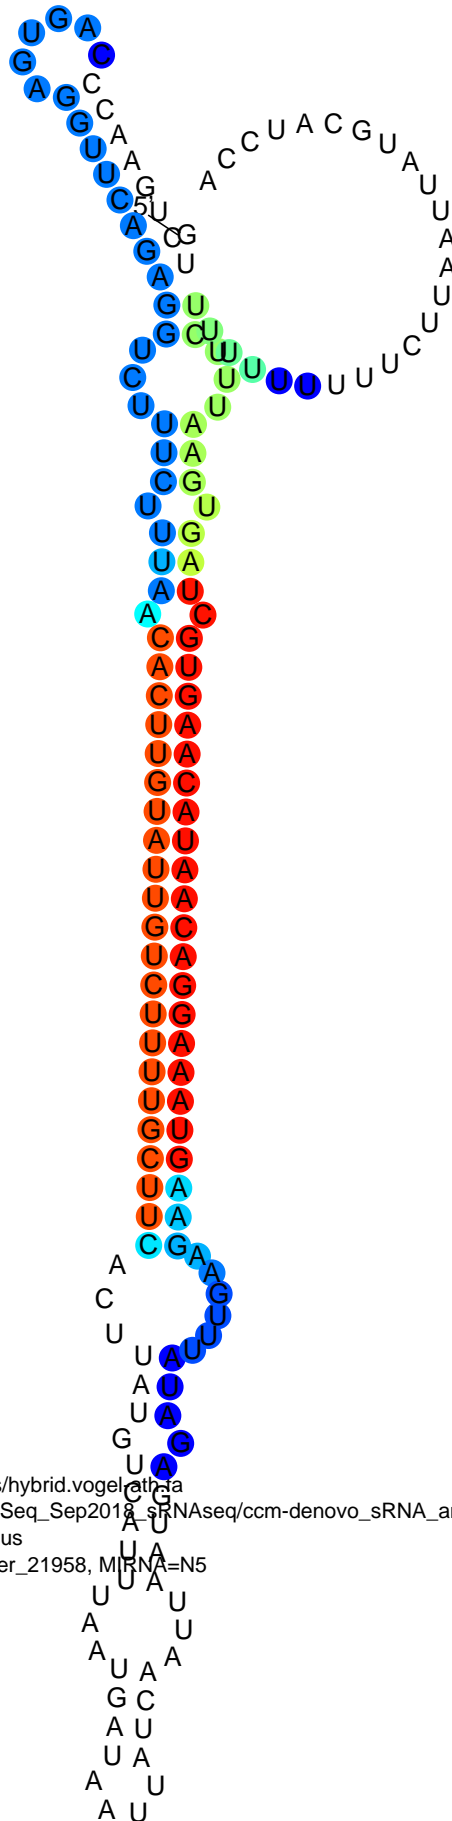

Genome: /Volumes/Keep/+genomes/hybrid\_genomes/hybrid.vogel.cth.gfa

Alignments: /Volumes/Keep/+Cuscuta\_evolution/NextSeq\_Sep2018\_sRNAseq/ccm-denovo\_sRNA\_annotation/02out-cca.hybrid.ShortStack/merged\_alignments

Location: Ccam0.32\_scaffold14b:884768-884929 minus

Name: SFs=SupFam\_279,SupFam\_288,SSCI=Cluster\_21958,MRNA=N5

Depth of Coverage

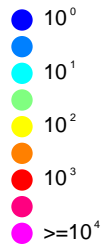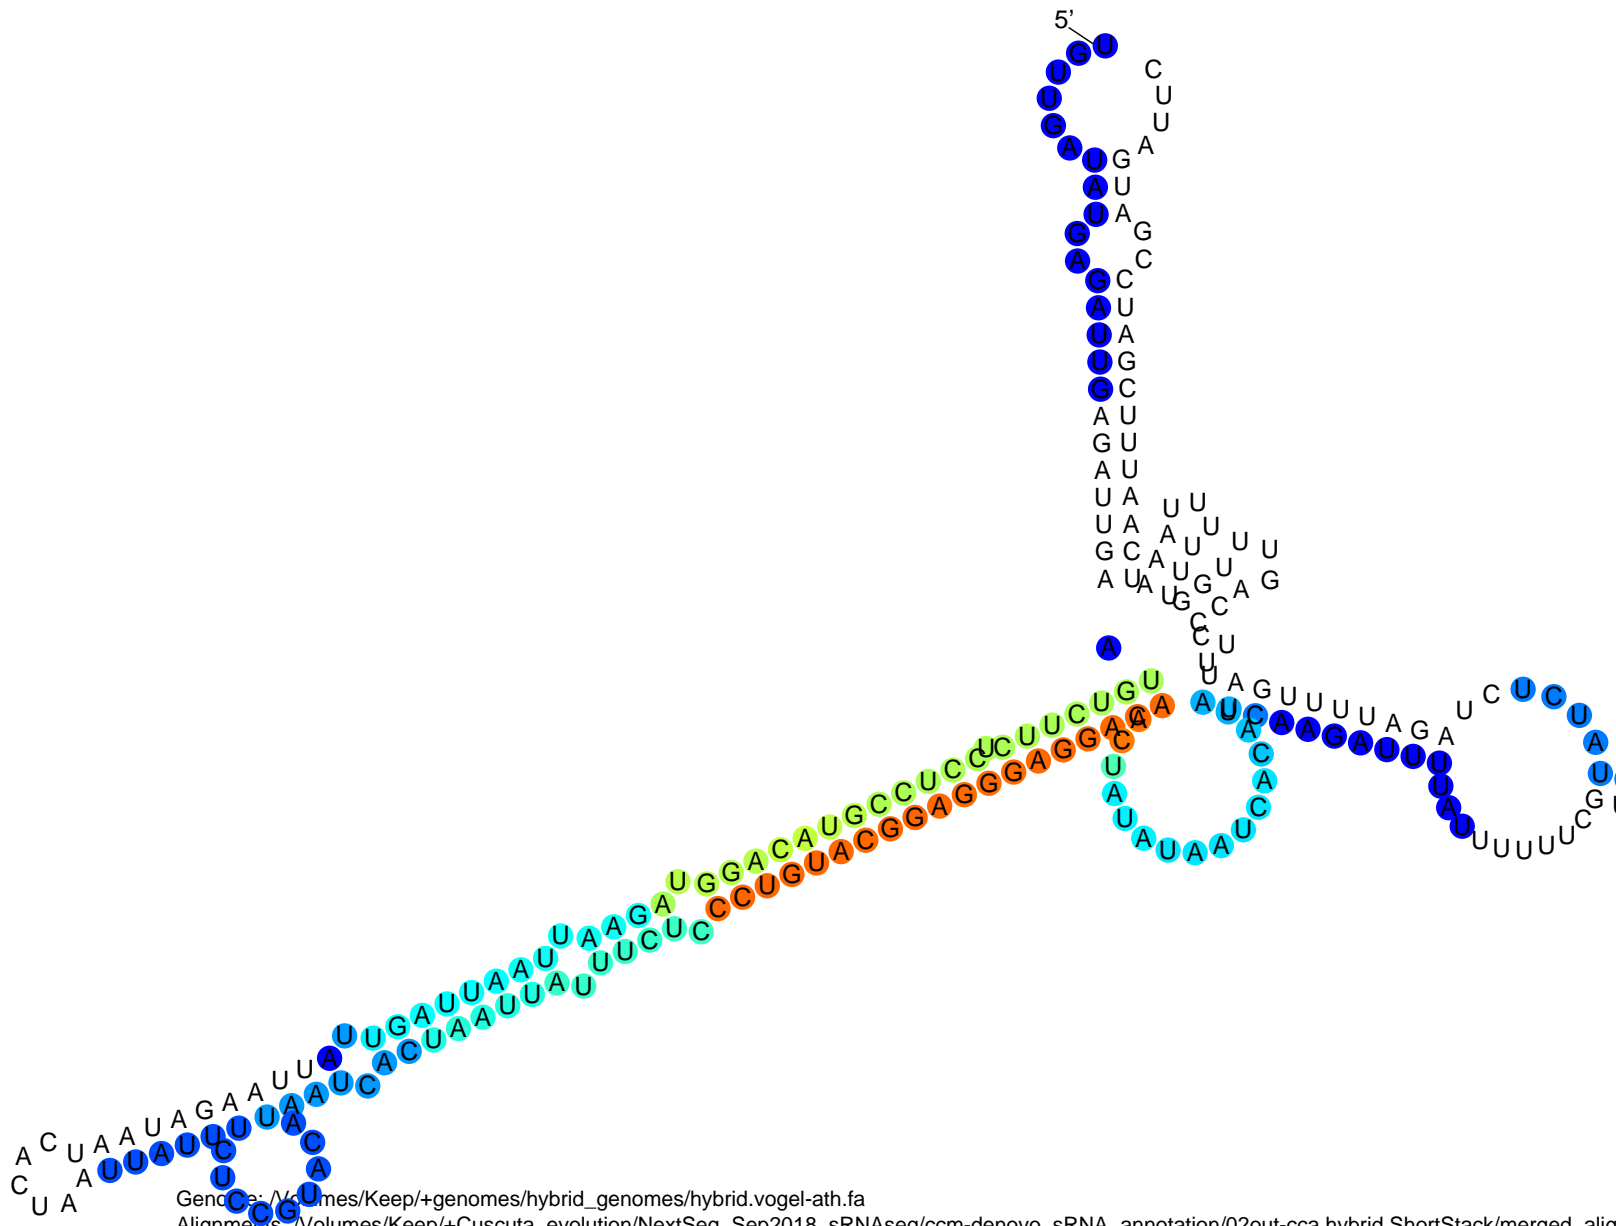

Genomes: /Volumes/Keep/+genomes/hybrid\_genomes/hybrid.vogel-ath.fa

Alignments: /Volumes/Keep/+Cuscuta\_evolution/NextSeq\_Sep2018\_sRNAseq/cem-denovo\_sRNA\_annotation/02out-cca.hybrid.ShortStack/merged\_align

Location: Ccam0.32\_scaffold14b:1771194-1771435 plus

Name: SFs=SupFam\_40, SSCI=Cluster\_22371, MIRNA=N5













Depth of Coverage

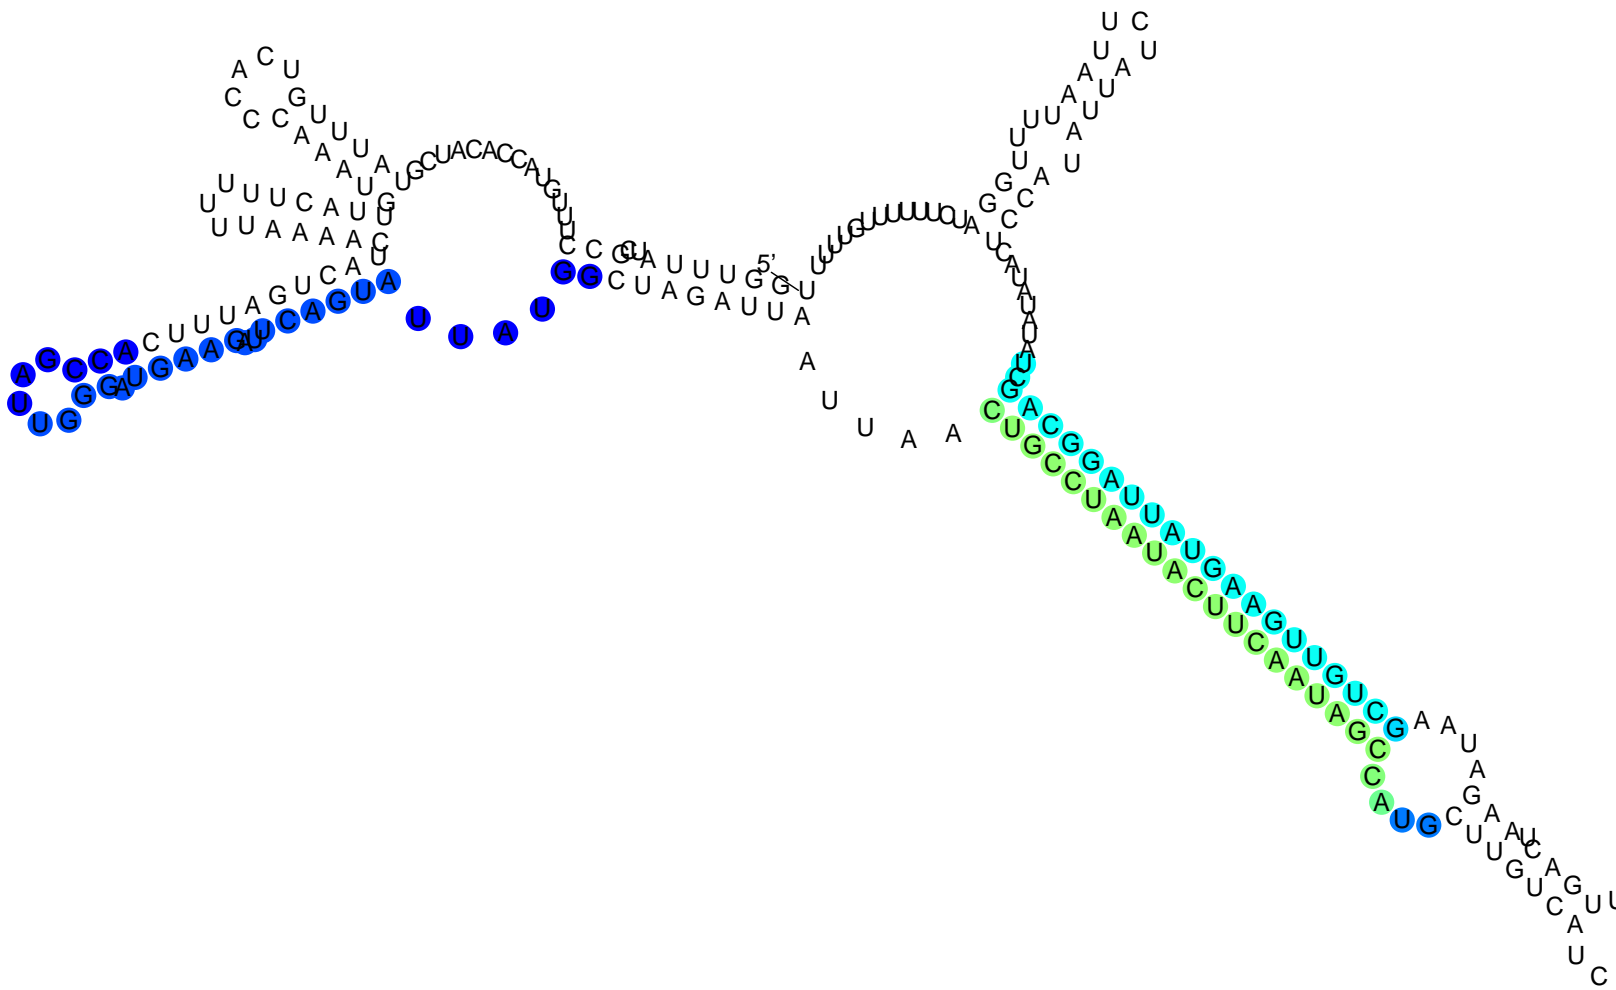

Genome: /Volumes/Keep/+genomes/hybrid\_genomes/hybrid.vogel-ath.fa

Alignments: /Volumes/Keep/+Cuscuta\_evolution/NextSeq\_Sep2018\_sRNAseq/ccm-denovo\_sRNA\_annotation/02out-cca.hybrid.ShortStack/merged\_align

Location: Ccam0.32\_scaffold23:330582-330824 minus

Name: SFs=SupFam\_342, SSCI=Cluster\_32905, MIRNA=Y









Depth of Coverage

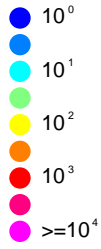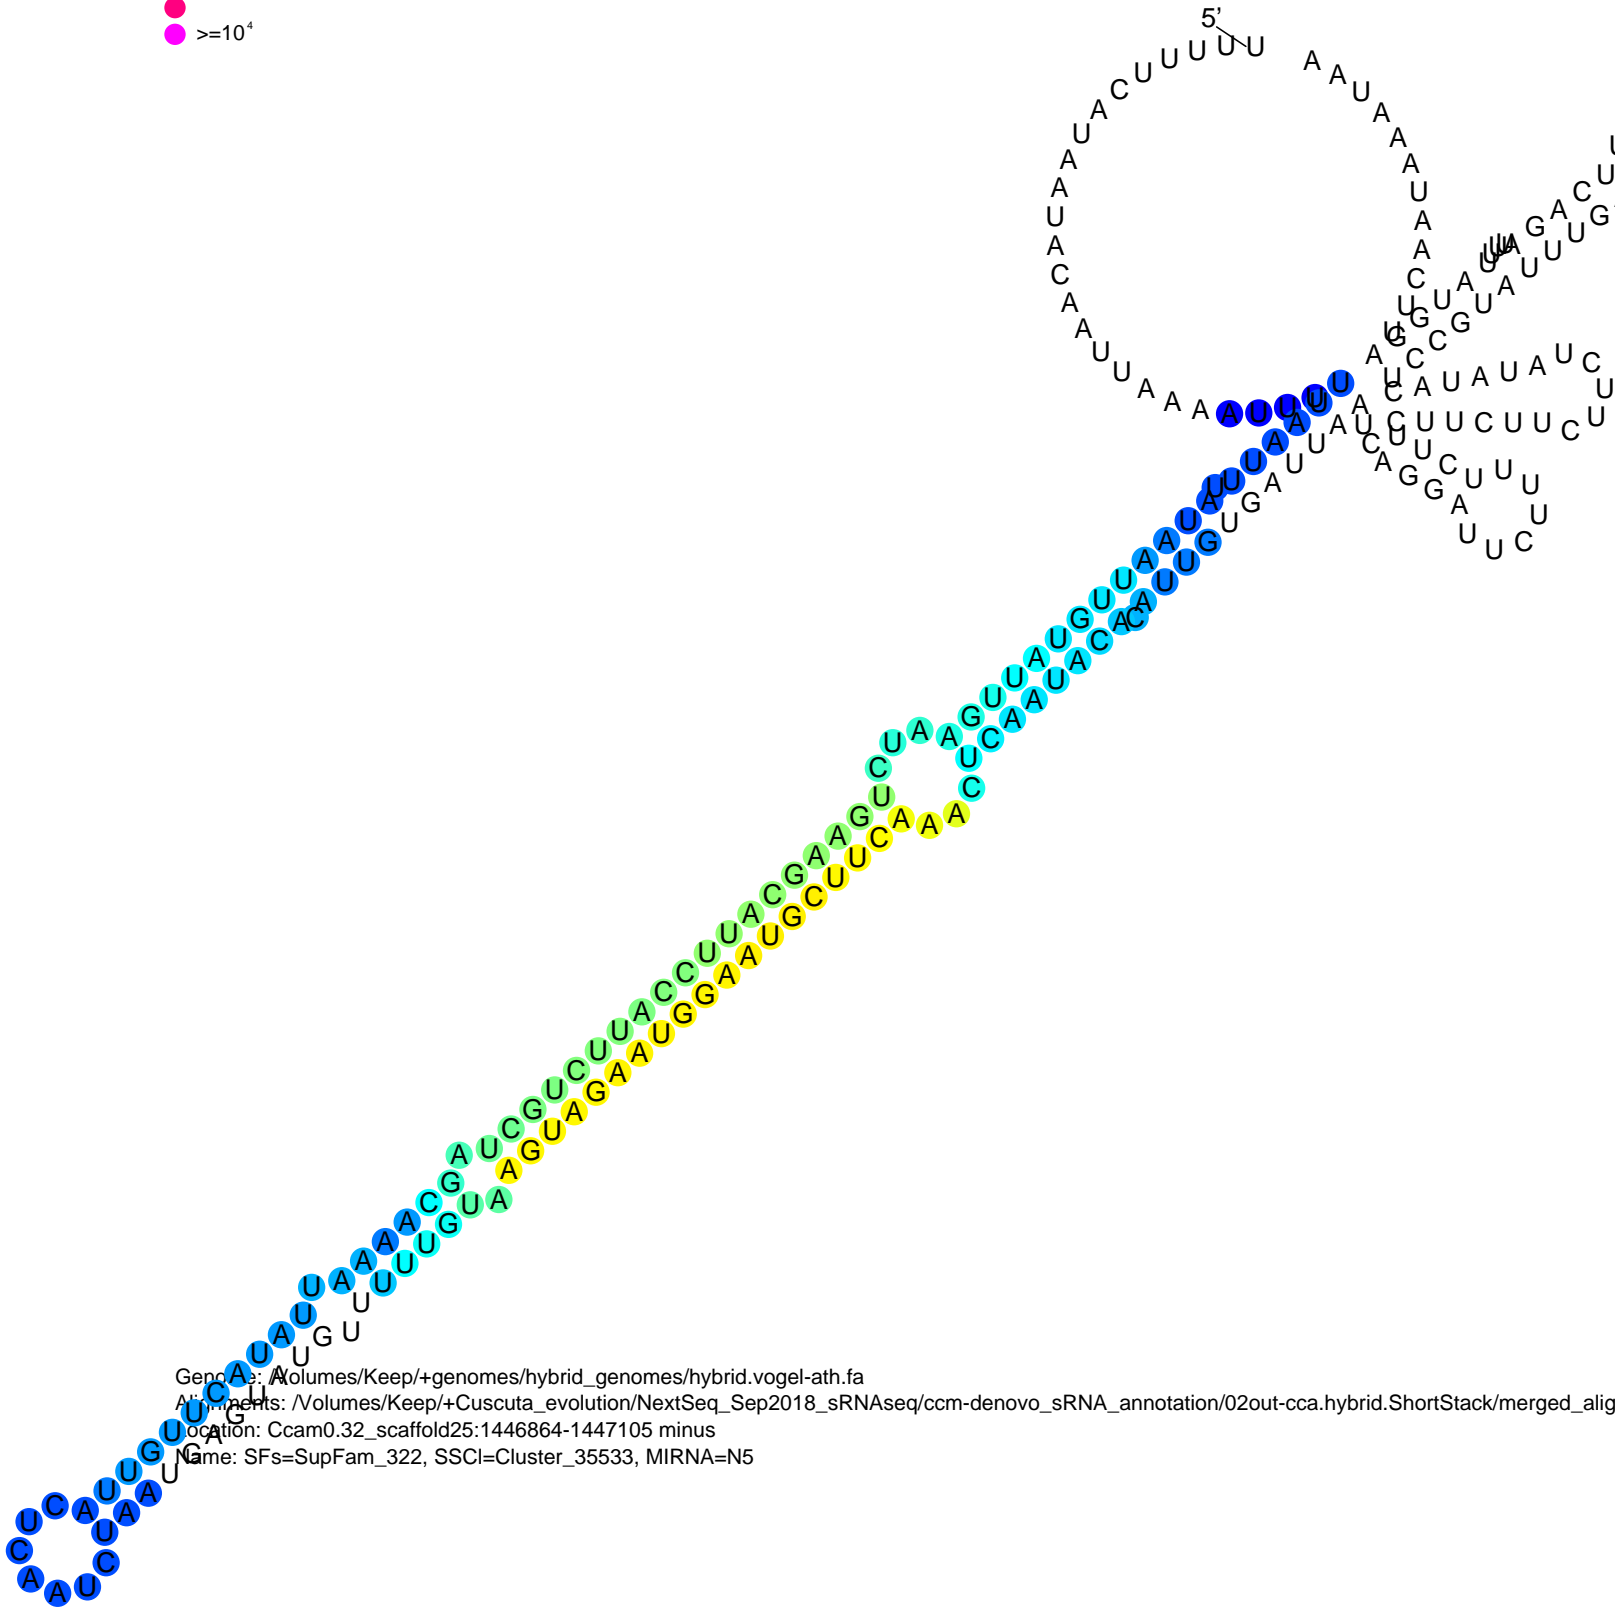

Gene: /Volumes/Keep/+genomes/hybrid\_genomes/hybrid.vogel-ath.fa

Alignments: /Volumes/Keep/+Cuscuta\_evolution/NextSeq\_Sep2018\_sRNAseq/ccm-denovo\_sRNA\_annotation/02out-cca.hybrid.ShortStack/merged\_alignments

Location: Ccam0.32\_scaffold25:1446864-1447105 minus

Name: SFs=SupFam\_322, SSCI=Cluster\_35533, MIRNA=N5

Depth of Coverage

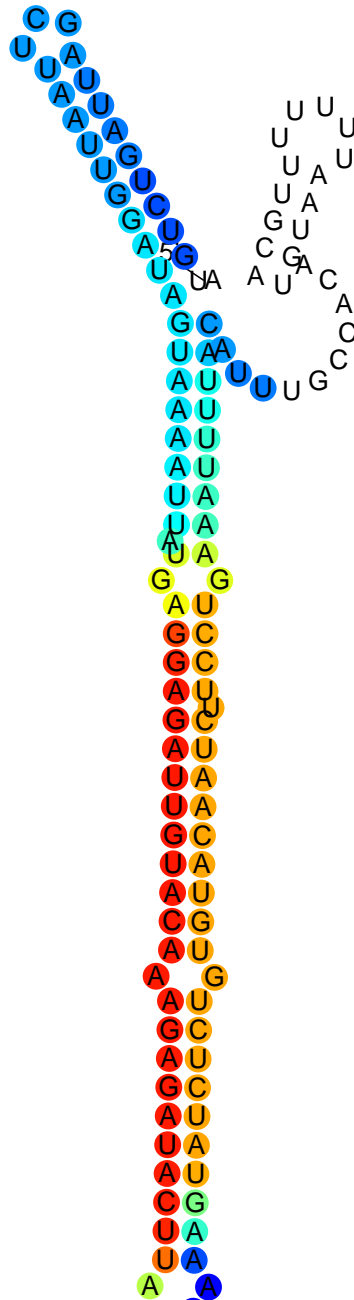

Genome: /Volumes/Keep/+genomes/hybrid\_genomes/hybrid.vogel-ath.fa  
Alignments: /Volumes/Keep/+Cuscuta\_evolution/NextSeq\_Sep2018\_sRNAseq/cm-denovo\_sRNA\_annotation/02out-cca.hybrid.ShortStack/merged\_alignments  
Location: Ccam0.32\_scaffold26:2523657-2523816 minus  
Name: SFs=SupFam\_134,SupFam\_71, SSCI=Cluster\_37083, MIRNA=Y





Depth of Coverage

- 10<sup>0</sup>
- 10<sup>1</sup>
- 10<sup>2</sup>
- 10<sup>3</sup>
- >=10<sup>4</sup>

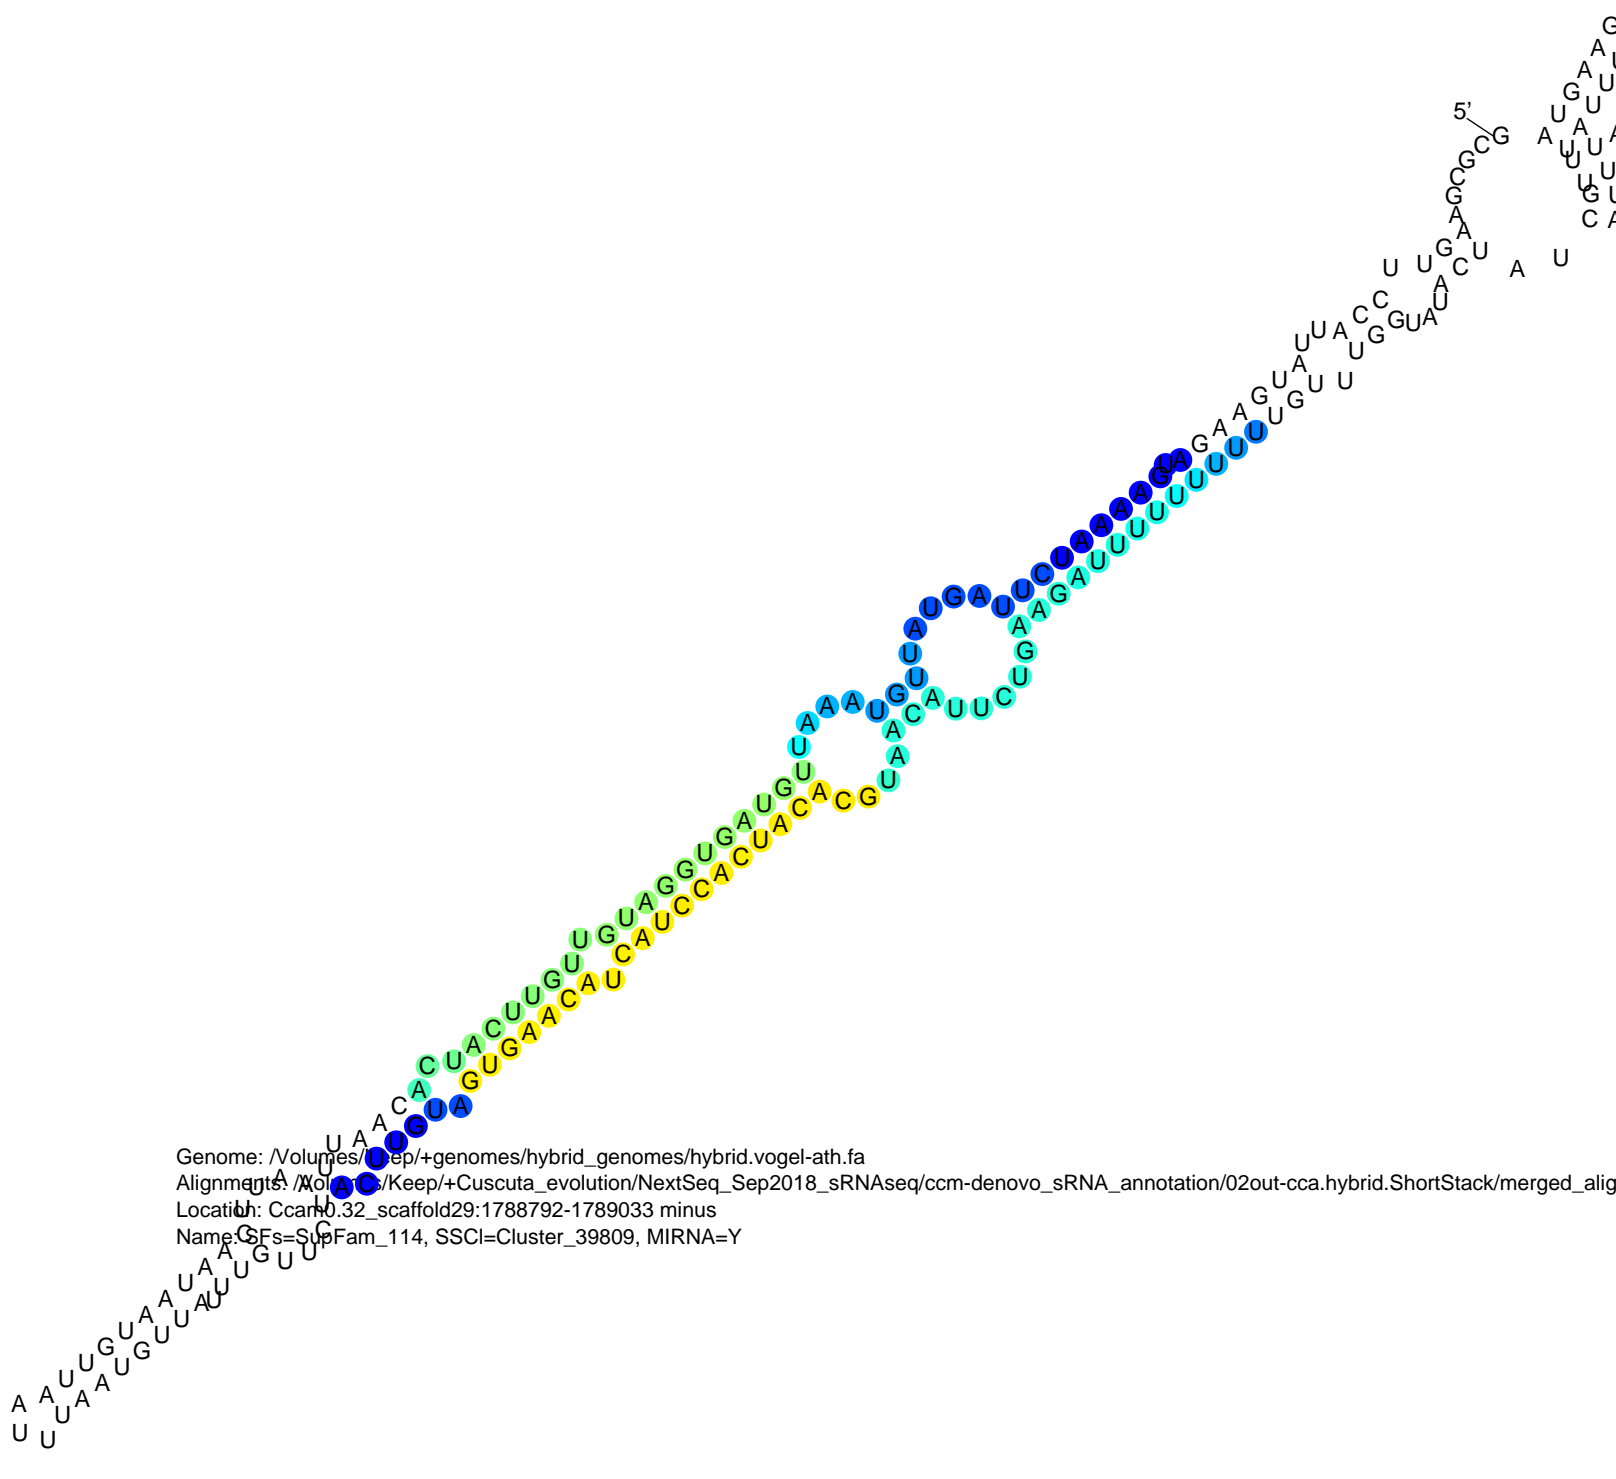

Genome: /Volumes/10000/ep/+genomes/hybrid\_genomes/hybrid.vogel-ath.fa

Alignments: /Volumes/10000/Keep/+Cuscuta\_evolution/NextSeq\_Sep2018\_sRNAseq/cem-denovo\_sRNA\_annotation/02out-cca.hybrid.ShortStack/merged\_alignments

Location: Ccan0.32\_scaffold29:1788792-1789033 minus

Name: SFS=SupFam\_114, SSCI=Cluster\_39809, MIRNA=Y

















Depth of Coverage

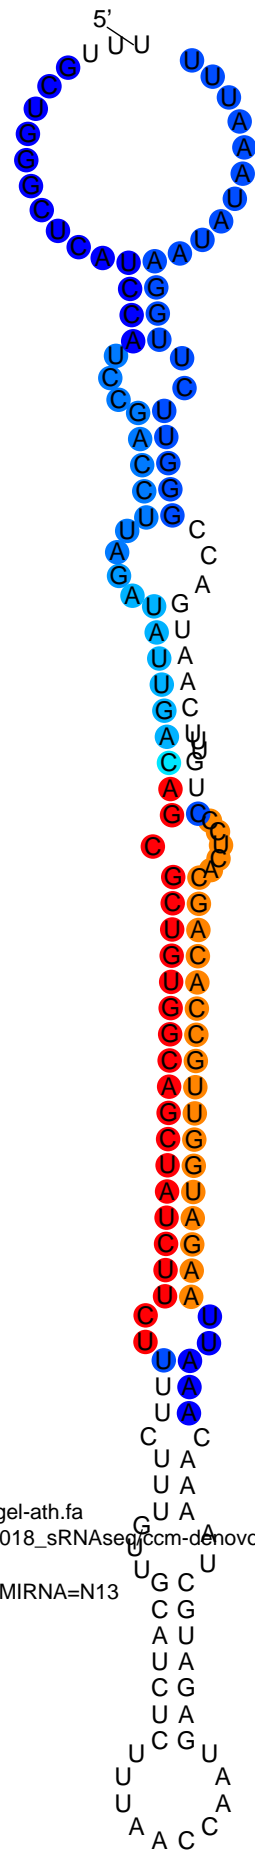

Genome: /Volumes/Keep/+genomes/hybrid\_genomes/hybrid.vogel-ath.fa

Alignments: /Volumes/Keep/+Cuscuta\_evolution/NextSeq\_Sep2018\_sRNAseq/cm-de-novo\_sRNA\_annotation/02out-cca.hybrid.ShortStack/merged\_align

Location: Ccam0.32\_scaffold35:1296572-1296731 minus

Name: SFs=SupFam\_276,SupFam\_300, SSCI=Cluster\_47276, MIRNA=N13





Depth of Coverage

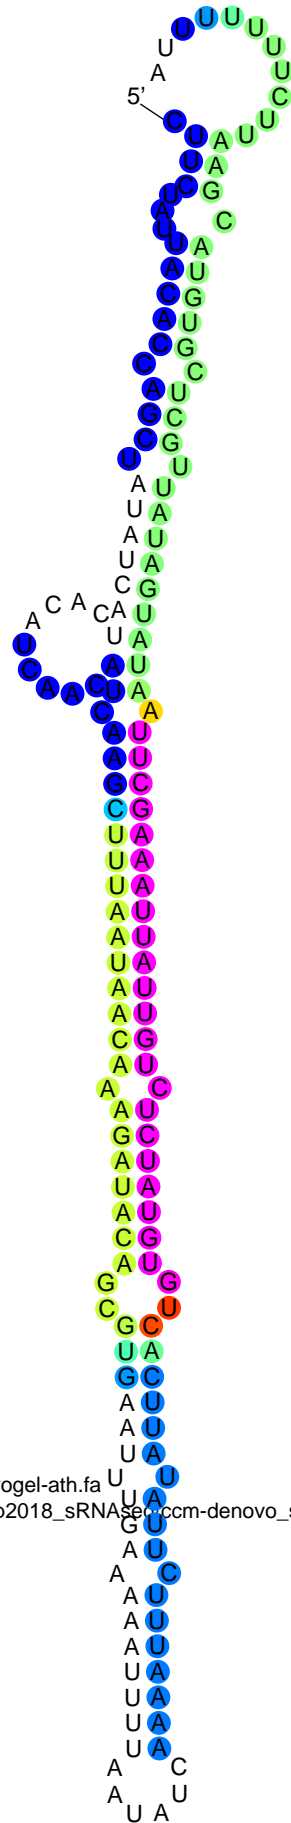

Genome: /Volumes/Keep/+genomes/hybrid\_genomes/hybrid.vogel-ath.fa

Alignments: /Volumes/Keep/+Cuscuta\_evolution/NextSeq\_Sep2018\_sRNASeq/ccm-denovo\_sRNA\_annotation/02out-cca.hybrid.ShortStack/merged\_alignments

Location: Ccam0.32\_scaffold35:2284637-2284797 minus

Name: SFs=SupFam\_63, SSCI=Cluster\_47637, MIRNA=N5







Depth of Coverage

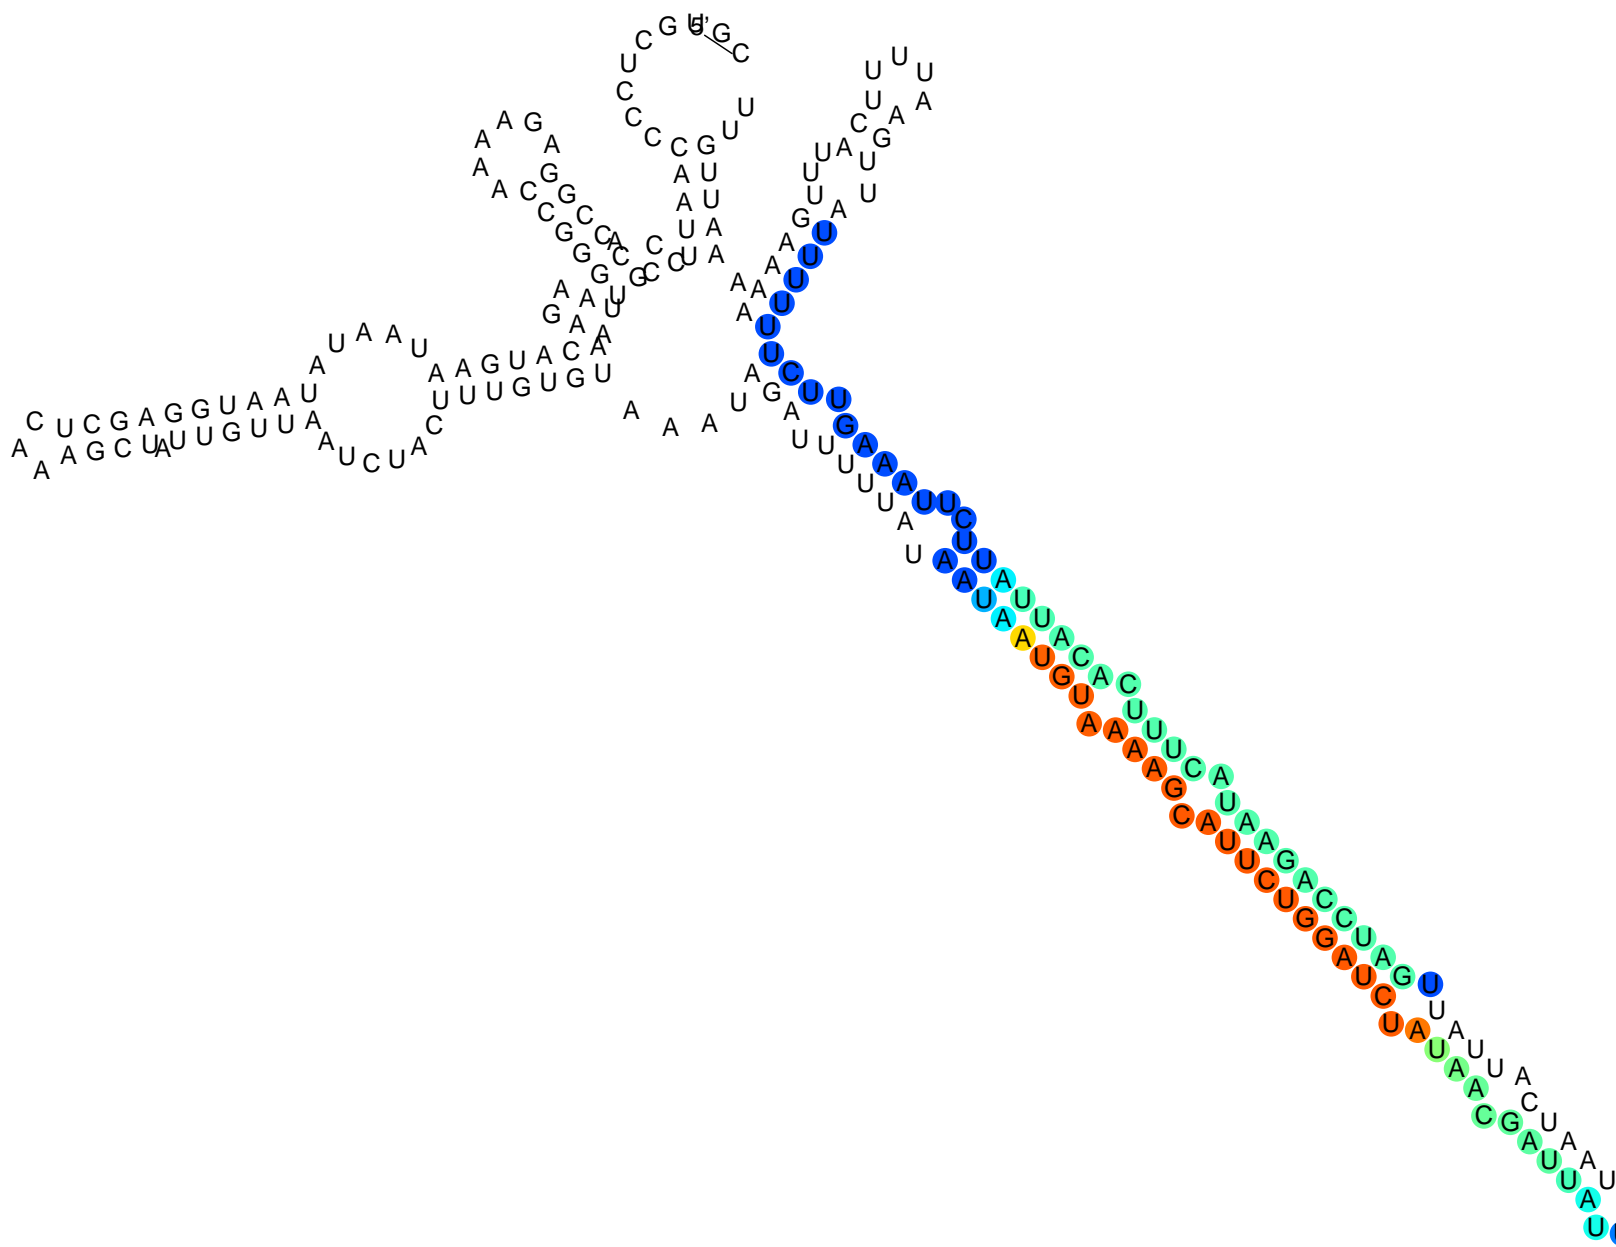

Genome: /Volumes/Keep/+genomes/hybrid\_genomes/hybrid.vogel-ath.fa

Alignments: /Volumes/Keep/+Cuscuta\_evolution/NextSeq\_Sep2018\_sRNAseq/ccm-denovo\_sRNA\_annotation/02out-cca.hybrid.ShortStack/merged\_alignments

Location: Ccam0.32\_scaffold40:502244-502485 plus

Name: SFs=SupFam\_196, SSCI=Cluster\_52374, MIRNA=Y







Depth of Coverage

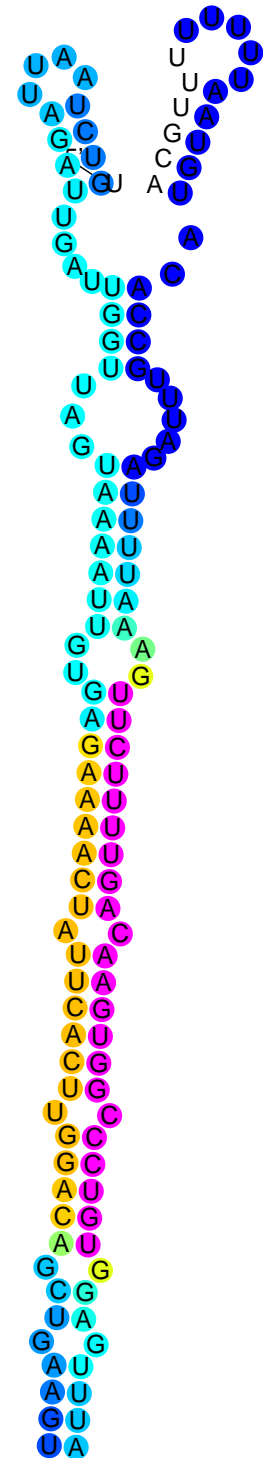

Genome: /Volumes/Keep/+genomes/hybrid\_genomes/hybrid.vogel-arc-fa  
Alignments: /Volumes/Keep/+Cuscuta\_evolution/NextSeq\_Sep2018/02RNAseq/cem-denovo\_sRNA\_annotation/02out-cca.hybrid.ShortStack/merged\_alignments  
Location: Ccam0.32\_scaffold43:501225-501383 plus  
Name: SFs=SupFam\_62,SupFam\_335, SSCI=Cluster\_55081, MRNA=Y

U  
A U  
U A  
A U  
U A  
A U  
C G  
A U  
A A

Depth of Coverage

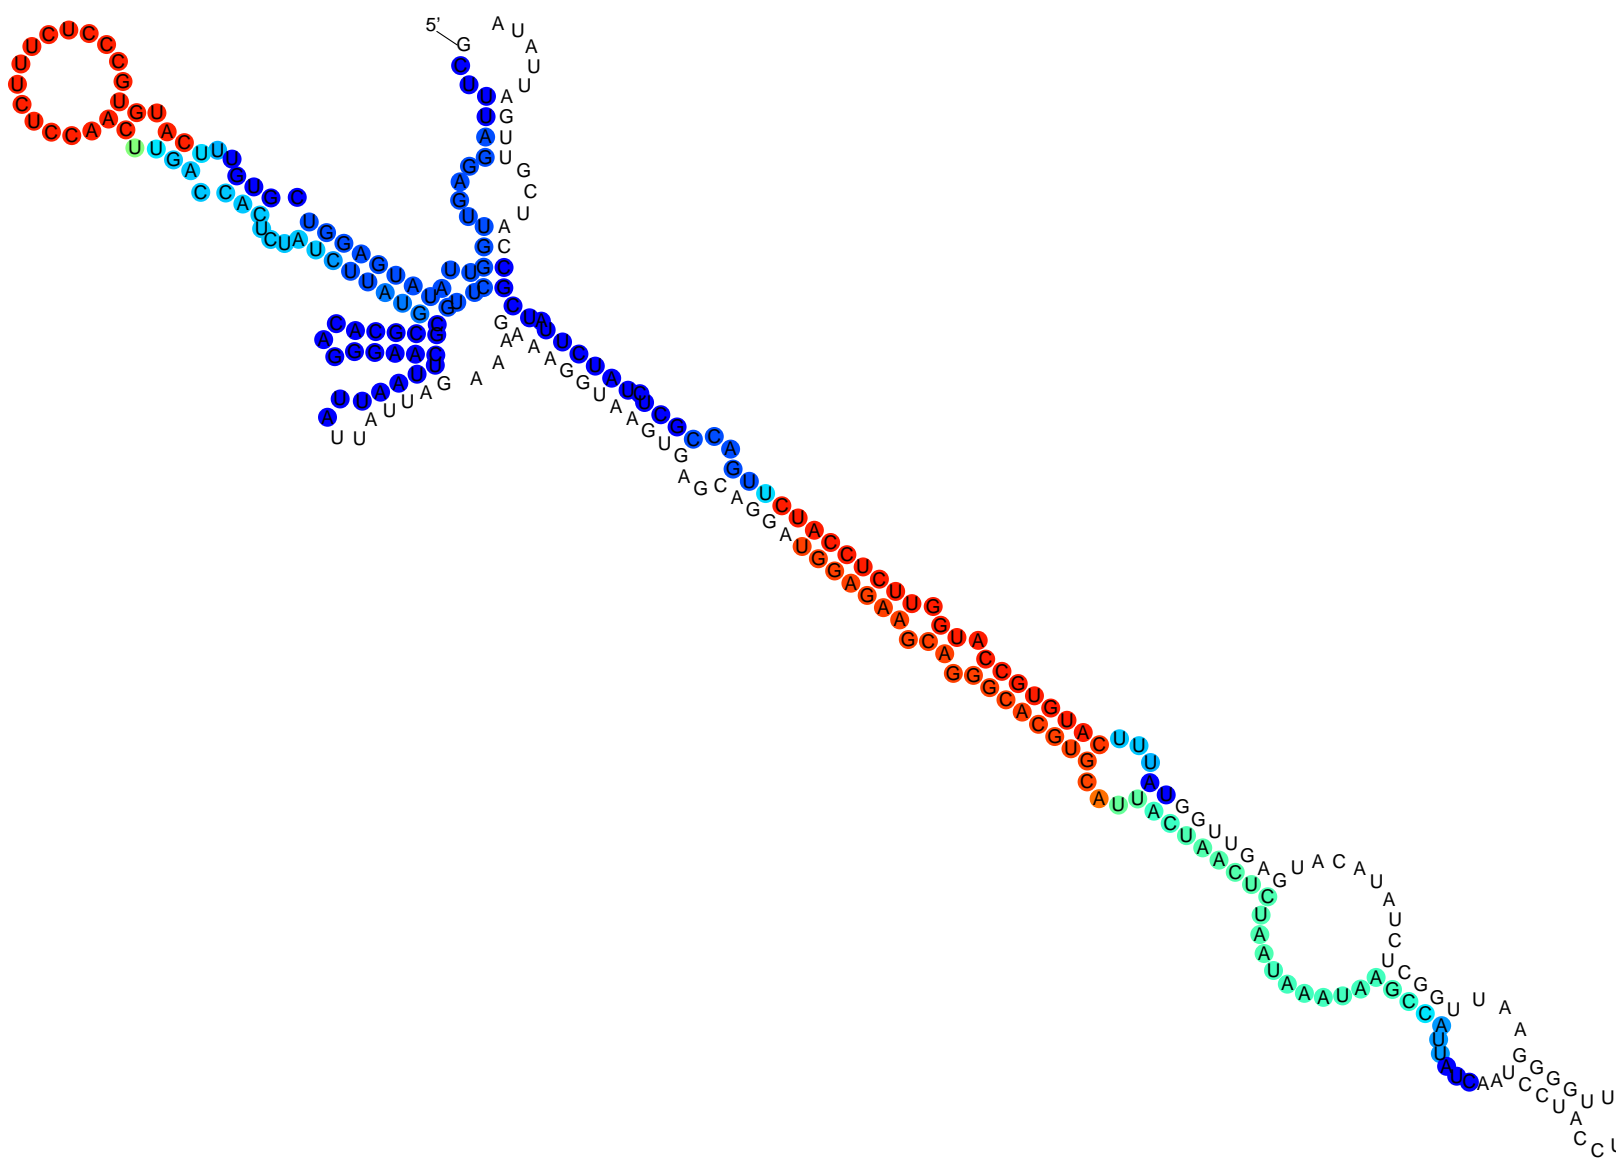

Genome: /Volumes/Keep/+genomes/hybrid\_genomes/hybrid.vogel-ath.fa

Alignments: /Volumes/Keep/+Cuscuta\_evolution/NextSeq\_Sep2018\_sRNAseq/ccm-denovo\_sRNA\_annotation/02out-cca.hybrid.ShortStack/merged\_align

Location: Ccam0.32\_scaffold44:569410-569710 minus

Name: SFs=SupFam\_2, SSCI=Cluster\_56048, MIRNA=N5



Depth of Coverage

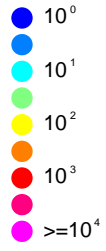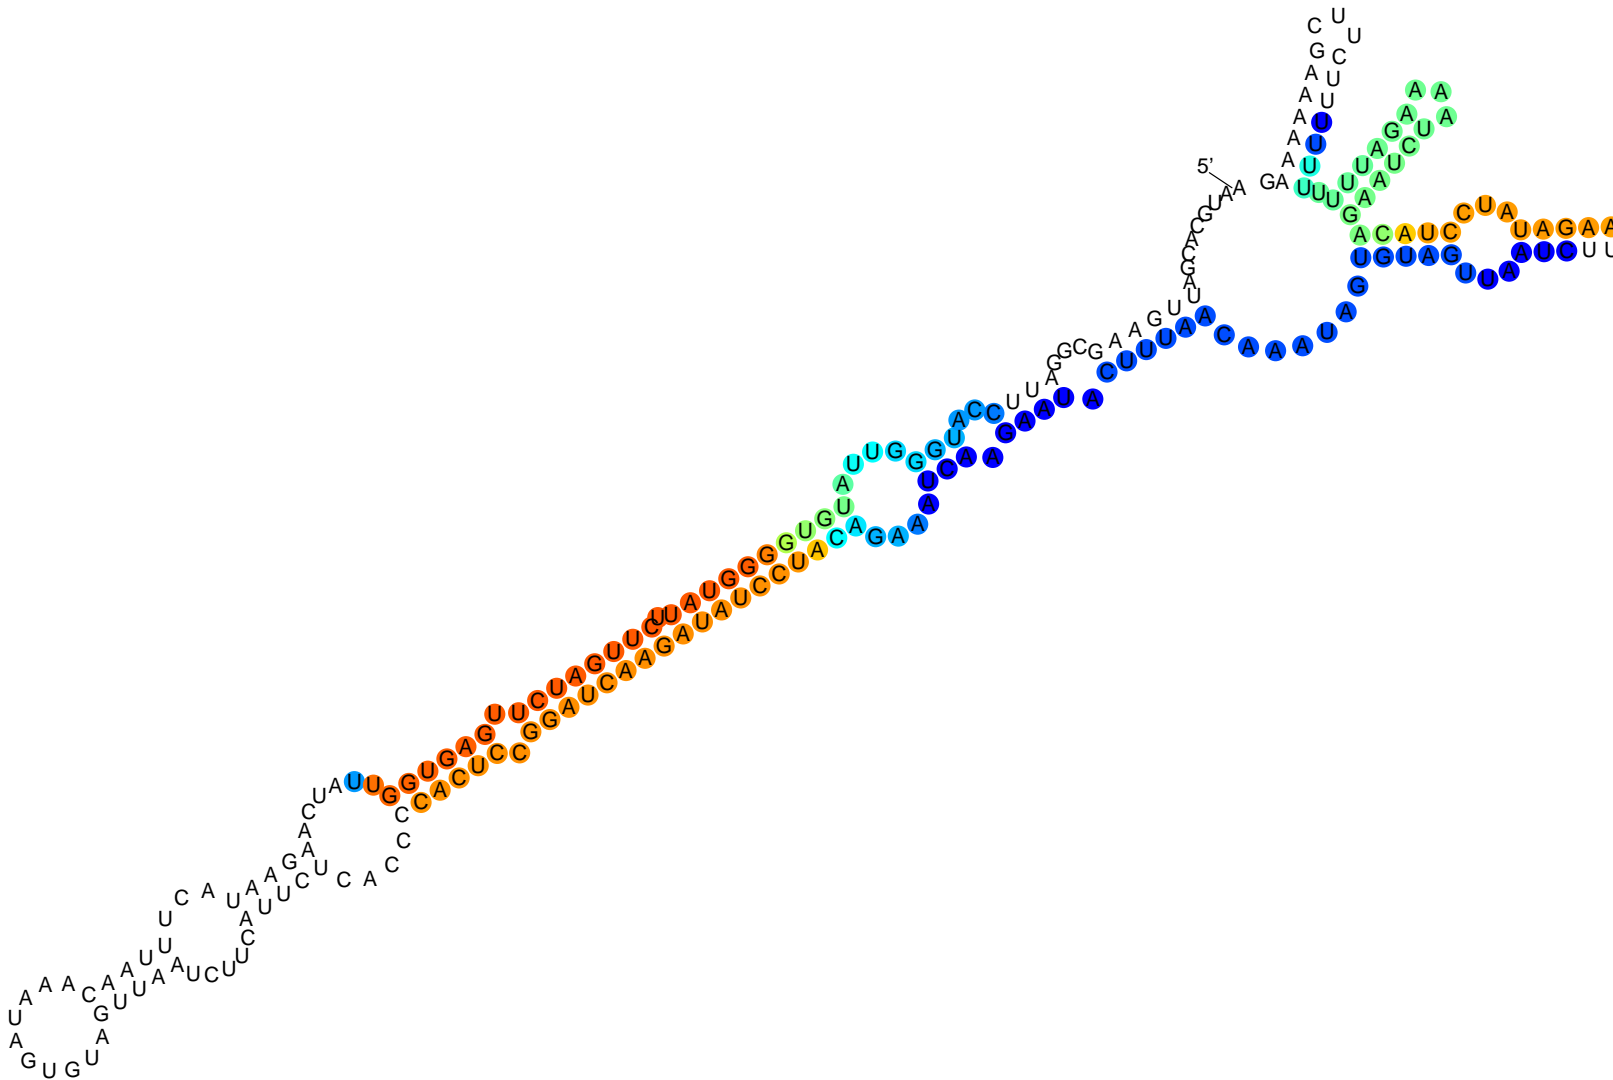

Genome: /Volumes/Keep/+genomes/hybrid\_genomes/hybrid.vogel-ath.fa

Alignments: /Volumes/Keep/+Cuscuta\_evolution/NextSeq\_Sep2018\_sRNAseq/cem-denovo\_sRNA\_annotation/02out-cca.hybrid.ShortStack/merged\_alignments

Location: Ccam0.32\_scaffold45:405815-406052 plus

Name: SFs=SupFam\_771,SupFam\_295, SSCI=Cluster\_57731, MIRNA=N5

Depth of Coverage

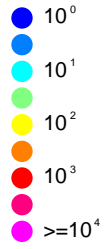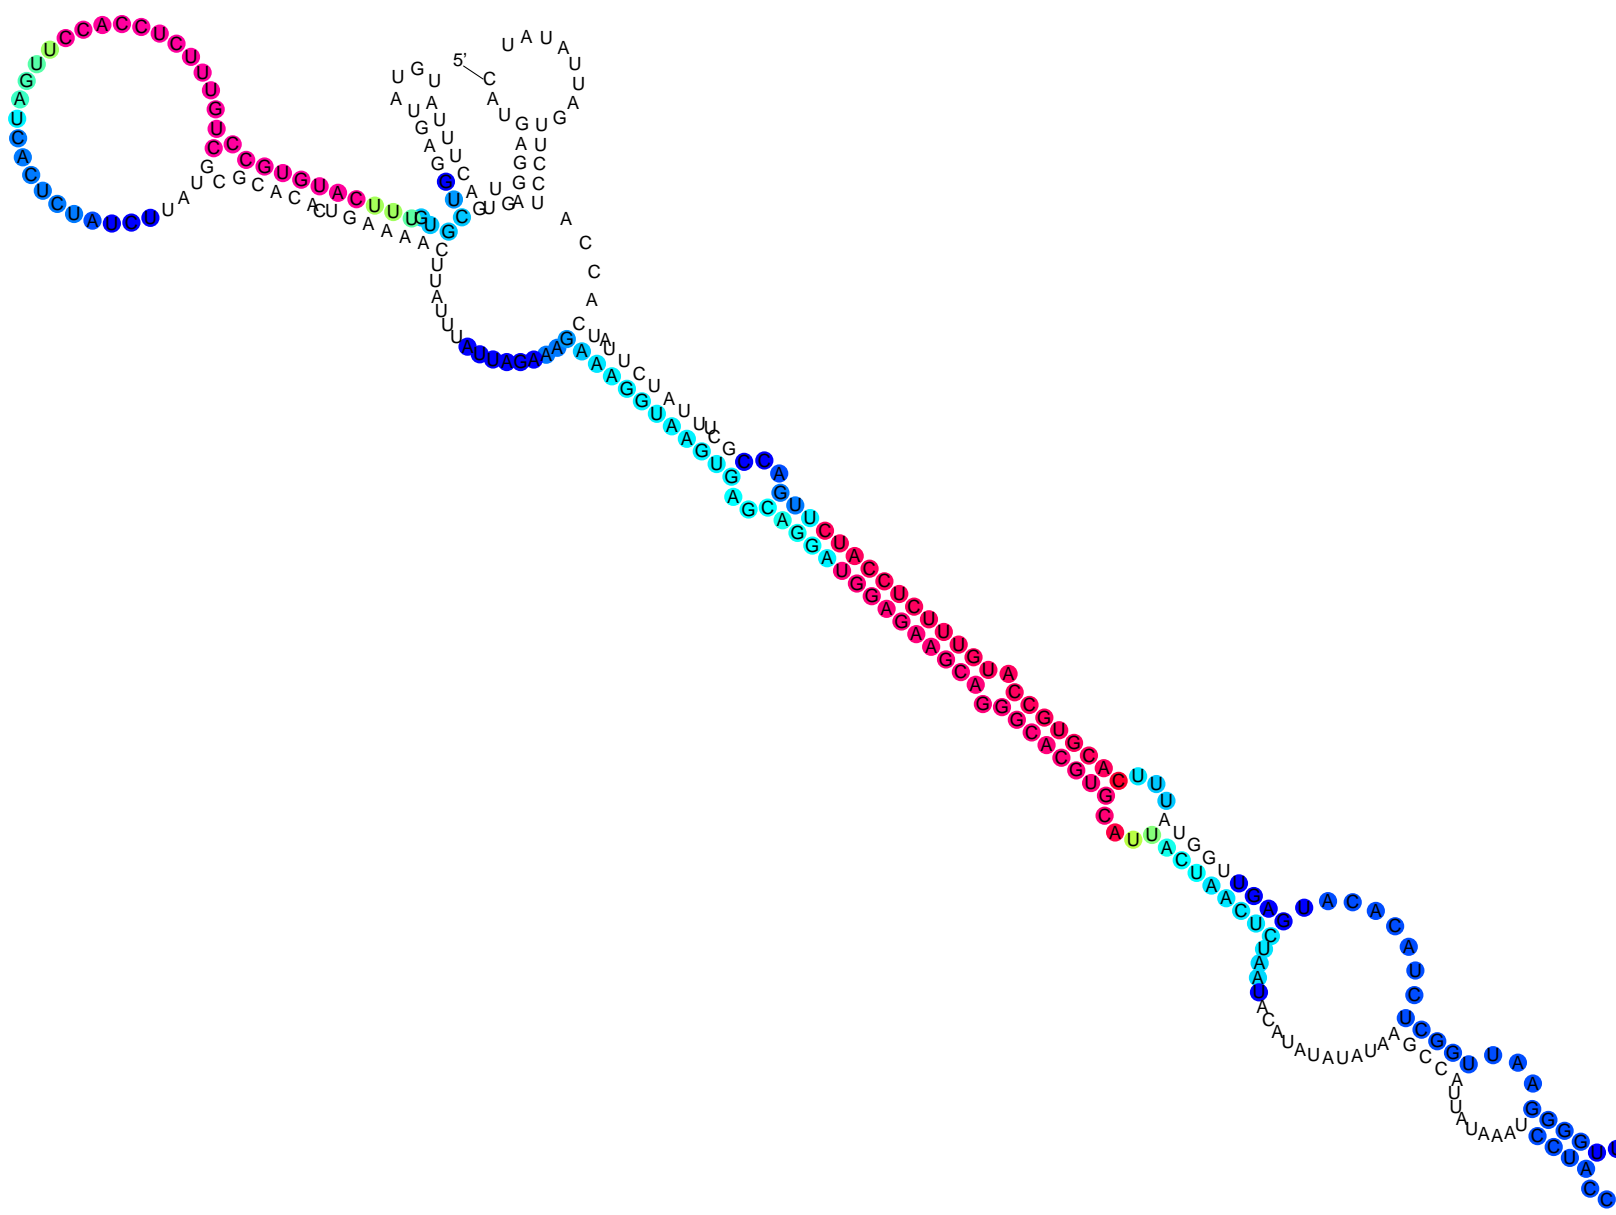

Genome: /Volumes/Keep/+genomes/hybrid\_genomes/hybrid.vogel-ath.fa

Alignments: /Volumes/Keep/+Cuscuta\_evolution/NextSeq\_Sep2018\_sRNAseq/cem-denovo\_sRNA\_annotation/02out-cca.hybrid.ShortStack/merged\_align

Location: Ccam0.32\_scaffold48:1350608-1350911 plus

Name: SFs=SupFam\_2, SSCI=Cluster\_60345, MIRNA=N5

Depth of Coverage

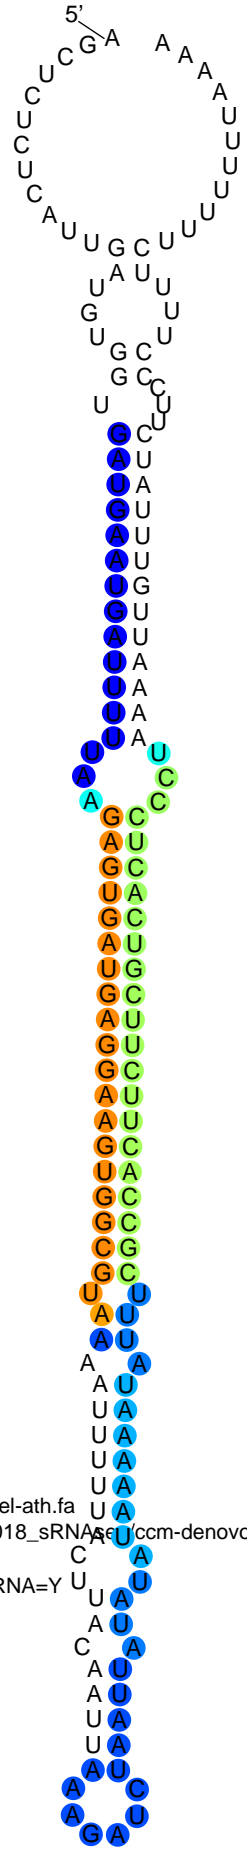

Genome: /Volumes/Keep/+genomes/hybrid\_genomes/hybrid.vogel-ath.fa  
 Alignments: /Volumes/Keep/+Cuscuta\_evolution/NextSeq\_Sep2018\_sRNASeq/ccm-denovo\_sRNA\_annotation/02out-cca.hybrid.ShortStack/merged\_alignments  
 Location: Ccam0.32\_scaffold57:48095-48253 minus  
 Name: SFs=SupFam\_73,SupFam\_12, SSCI=Cluster\_67362, MIRNA=Y



Depth of Coverage

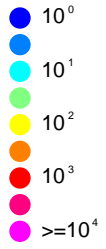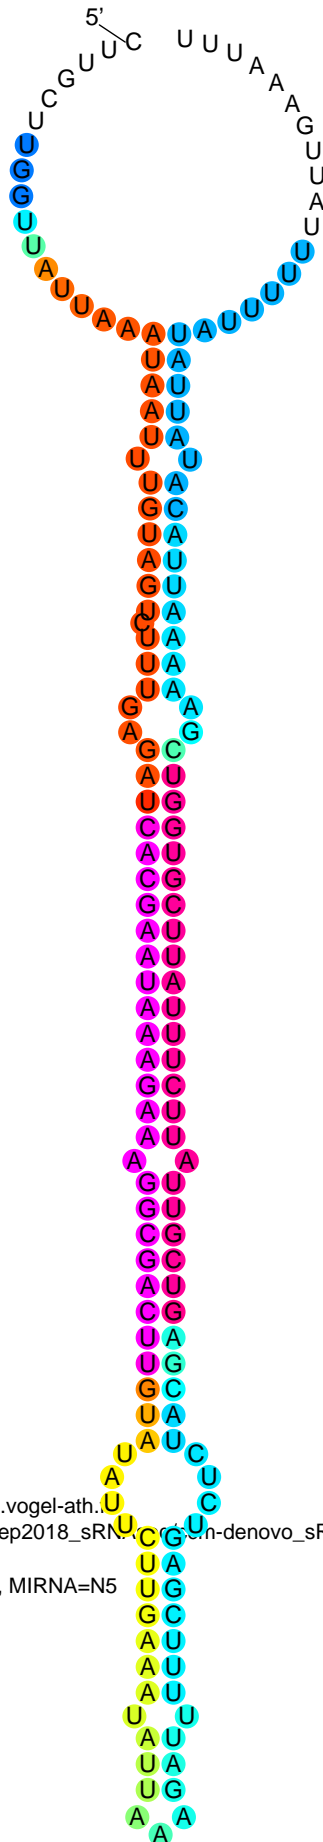

Genome: /Volumes/Keep/+genomes/hybrid\_genomes/hybrid.vogel-ath.  
 Alignments: /Volumes/Keep/+Cuscuta\_evolution/NextSeq\_Sep2018\_sRNA-  
 Location: Ccam0.32\_scaffold59:1855105-1855261 minus  
 Name: SFs=SupFam\_51,SupFam\_16, SSCI=Cluster\_69346, MIRNA=N5





Depth of Coverage

- $10^0$
- $10^1$
- $10^2$
- $10^3$
- $10^4$
- $\geq 10^5$
- $\geq 10^6$

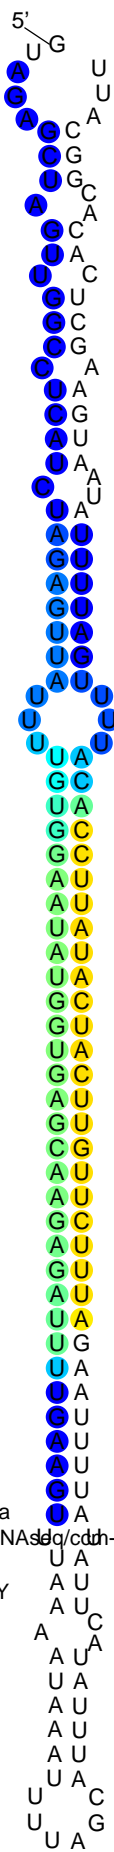

Genome: /Volumes/Keep/+genomes/hybrid\_genomes/hybrid.vogel-ath.fa

Alignments: /Volumes/Keep/+Cuscuta\_evolution/NextSeq\_Sep2018\_sRNAs/cdh-denovo\_sRNA\_annotation/02out-cca.hybrid.ShortStack/merged\_align

Location: Ccam0.32\_scaffold5:103937-104093 minus

Name: SFs=SupFam\_137,SupFam\_341, SSCI=Cluster\_7679, MIRNA=Y













Depth of Coverage

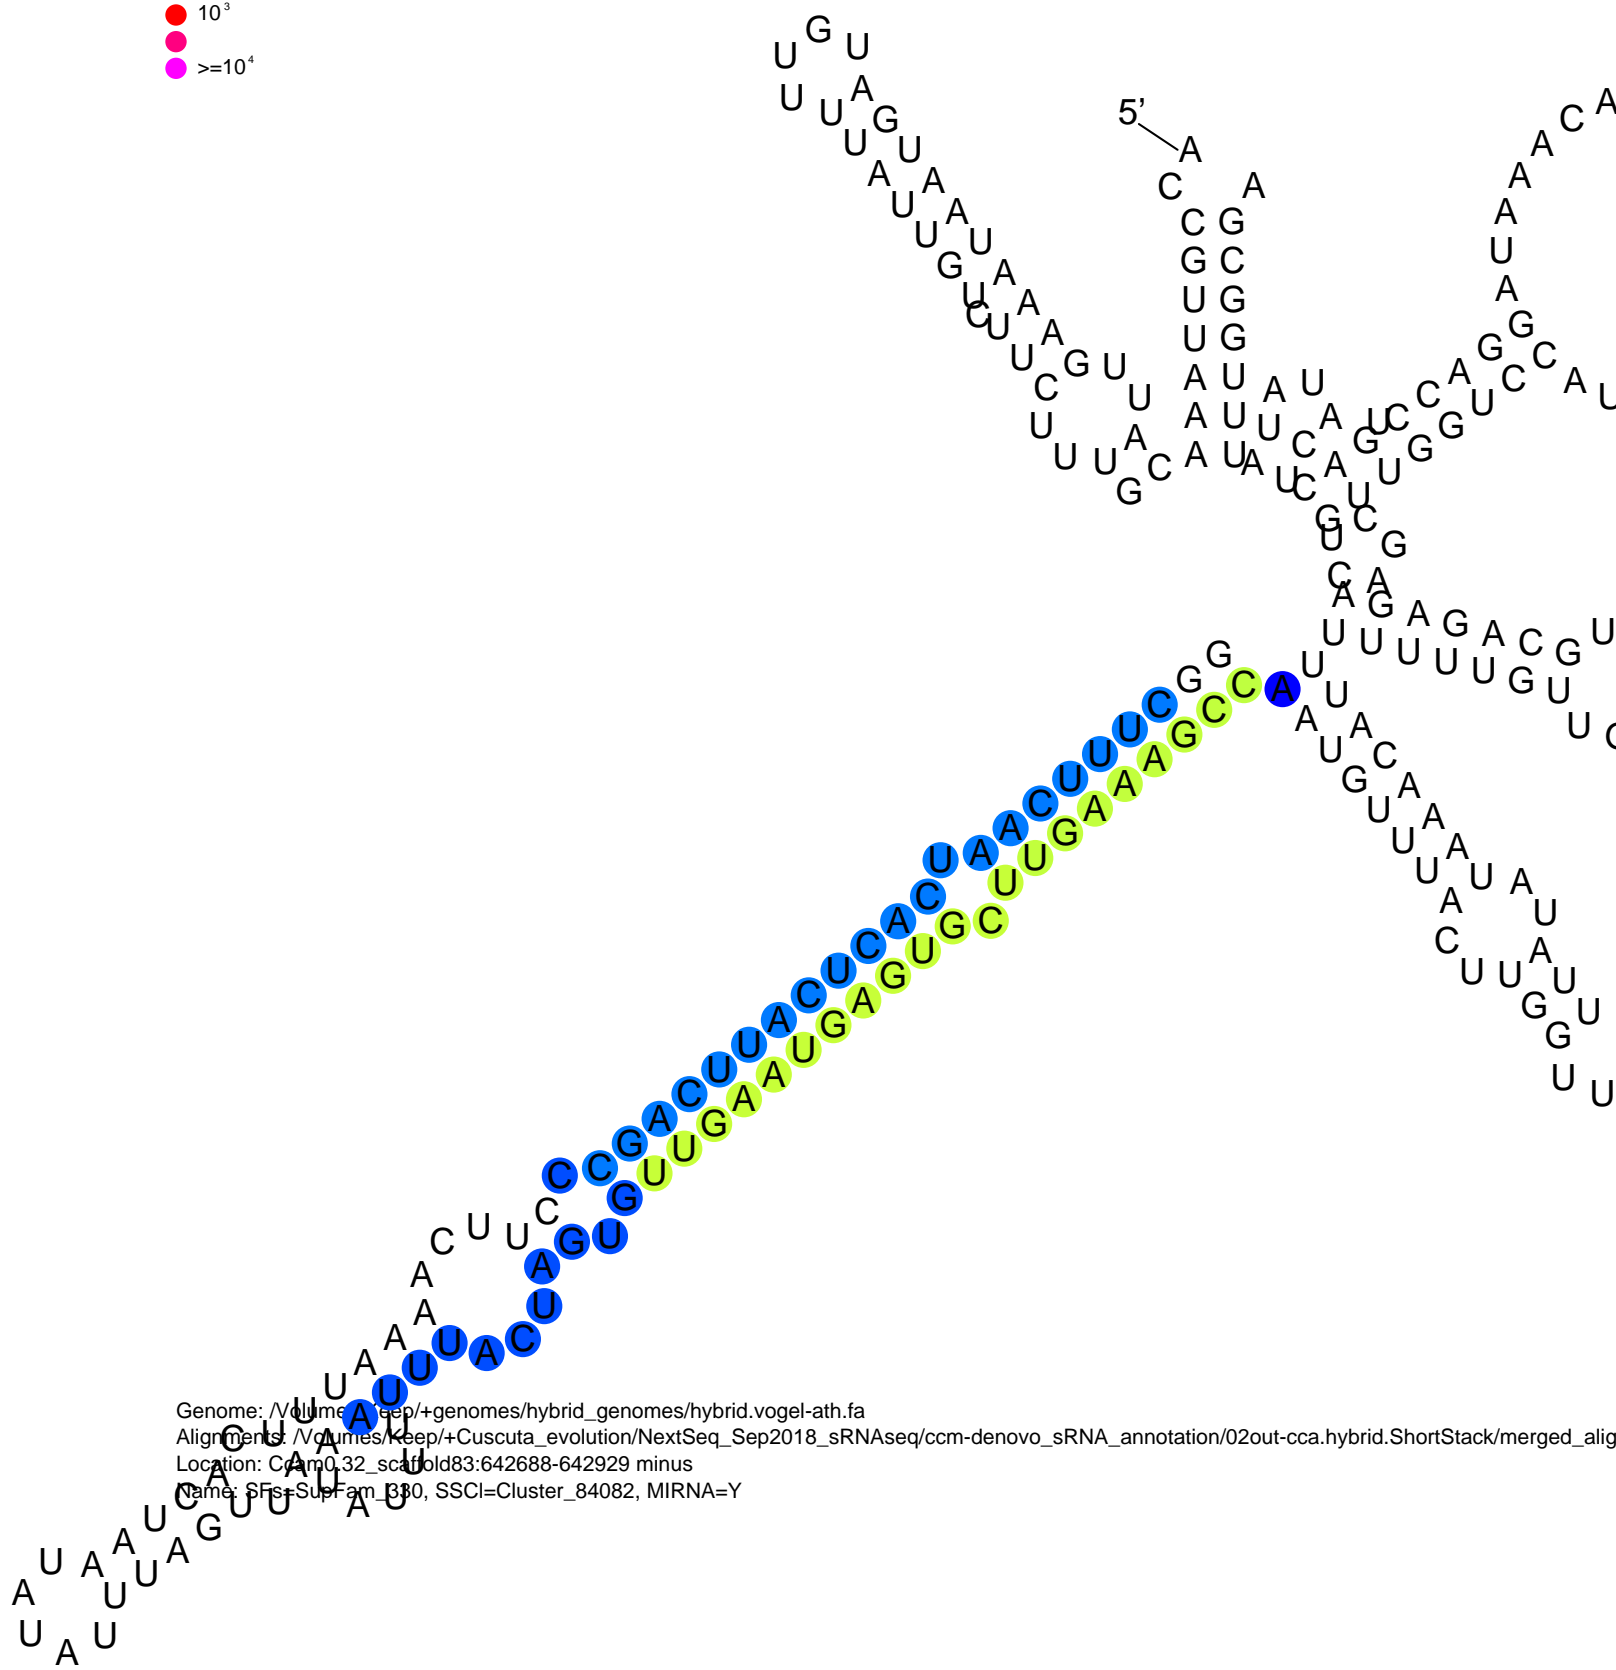

Genome: /Volumes/Deep/+genomes/hybrid\_genomes/hybrid.vogel-ath.fa

Alignments: /Volumes/Deep/+Cuscuta\_evolution/NextSeq\_Sep2018\_sRNAseq/ccm-denovo\_sRNA\_annotation/02out-cca.hybrid.ShortStack/merged\_alignments

Location: Cpm0\_32\_scaffold83:642688-642929 minus

Name: SFs+SupFam\_330, SSCI=Cluster\_84082, MIRNA=Y

Depth of Coverage

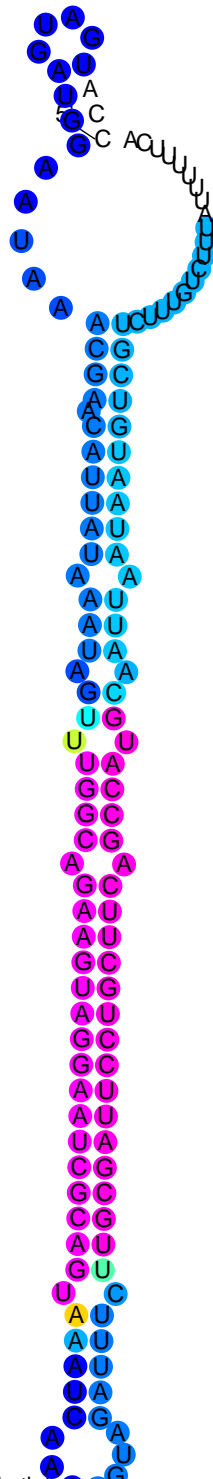

Genome: /Volumes/Keep/+genomes/hybrid\_genomes/hybrid.vogel-ath.fasta  
 Alignments: /Volumes/Keep/+Cuscuta\_evolution/NextSeq\_Sep2018\_sRNA/CCM/ccm-denovo\_sRNA\_annotation/02out-cca.hybrid.ShortStack/merged\_alignments  
 Location: Ccam0.32\_scaffold87b:766643-766801 minus  
 Name: SFs=SupFam\_50,SupFam\_6, SSCI=Cluster\_86832, MIRNA=N5





Depth of Coverage

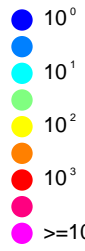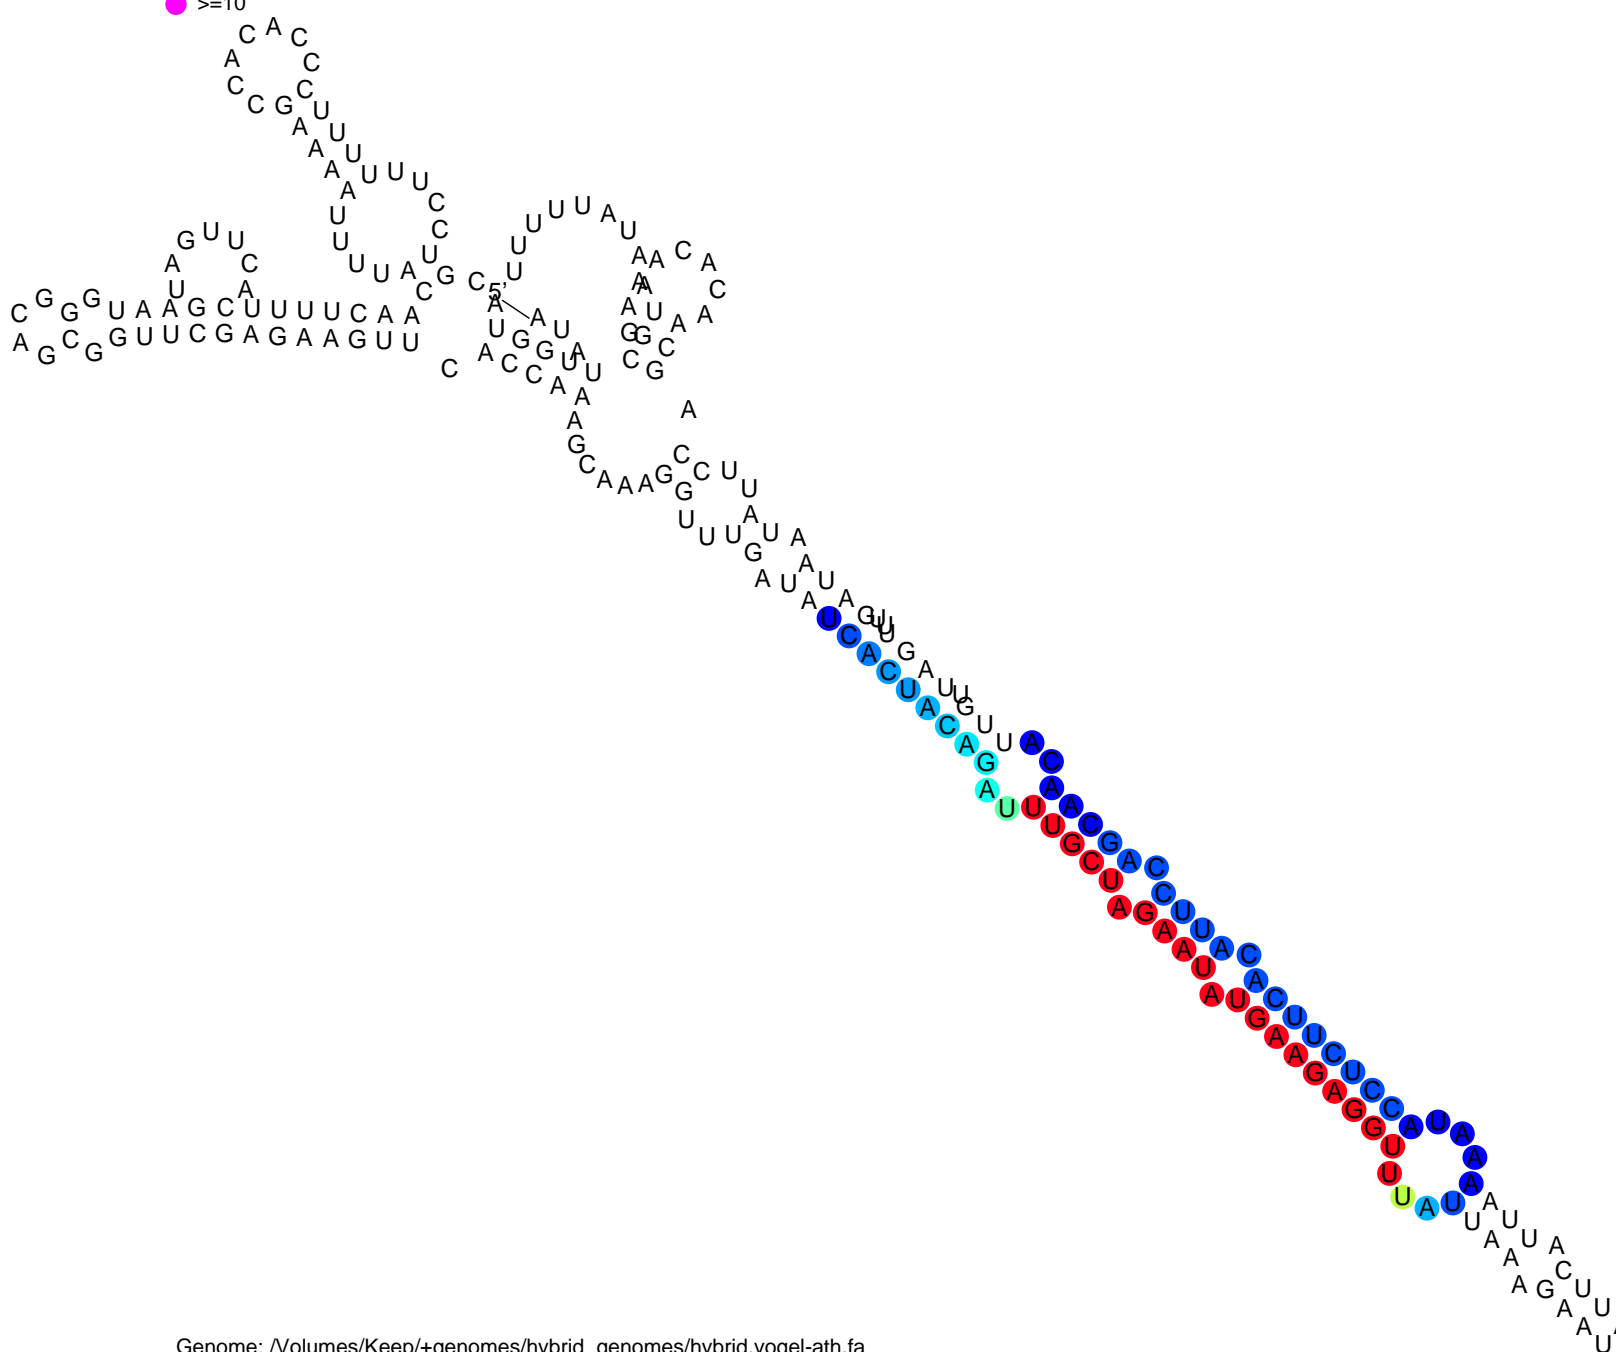

Genome: /Volumes/Keep/+genomes/hybrid\_genomes/hybrid.vogel-ath.fa

Alignments: /Volumes/Keep/+Cuscuta\_evolution/NextSeq\_Sep2018\_sRNAseq/cem-denovo\_sRNA\_annotation/02out-cca.hybrid.ShortStack/merged\_alignments

Location: Ccam0.32\_scaffold90:995497-995738 plus

Name: SFs=SupFam\_273, SSCI=Cluster\_88686, MIRNA=N5

Depth of Coverage

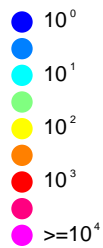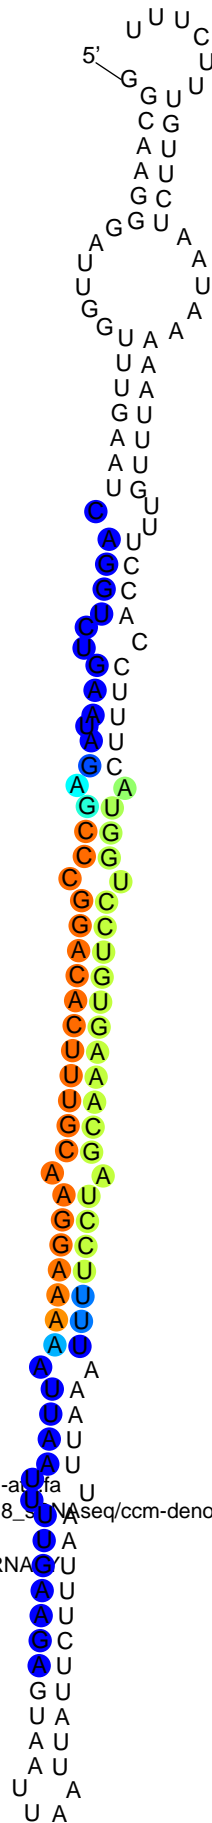

Genome: /Volumes/Keep/+genomes/hybrid\_genomes/hybrid.vogel-as.fa  
Alignments: /Volumes/Keep/+Cuscuta\_evolution/NextSeq\_Sep2018\_SRNAseq/ccm-denovo\_sRNA\_annotation/02out-cca.hybrid.ShortStack/merged\_alignments  
Location: Ccam0.32\_scaffold92b:991807-991962 plus  
Name: SFs=SupFam\_331,SupFam\_70, SSCI=Cluster\_89793, MIRNA\_C1127



Depth of Coverage

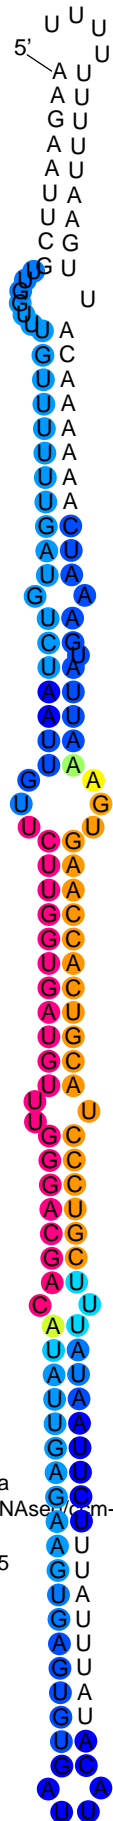

Genome: /Volumes/Keep/+genomes/hybrid\_genomes/hybrid.vogel-ath.fa

Alignments: /Volumes/Keep/+Cuscuta\_evolution/NextSeq\_Sep2018\_sRNAseq/asm-denovo\_sRNA\_annotation/02out-cca.hybrid.ShortStack/merged\_align

Location: Ccam0.32\_scaffold99:713740-713896 minus

Name: SFs=SupFam\_74,SupFam\_21, SSCI=Cluster\_94036, MIRNA=N5

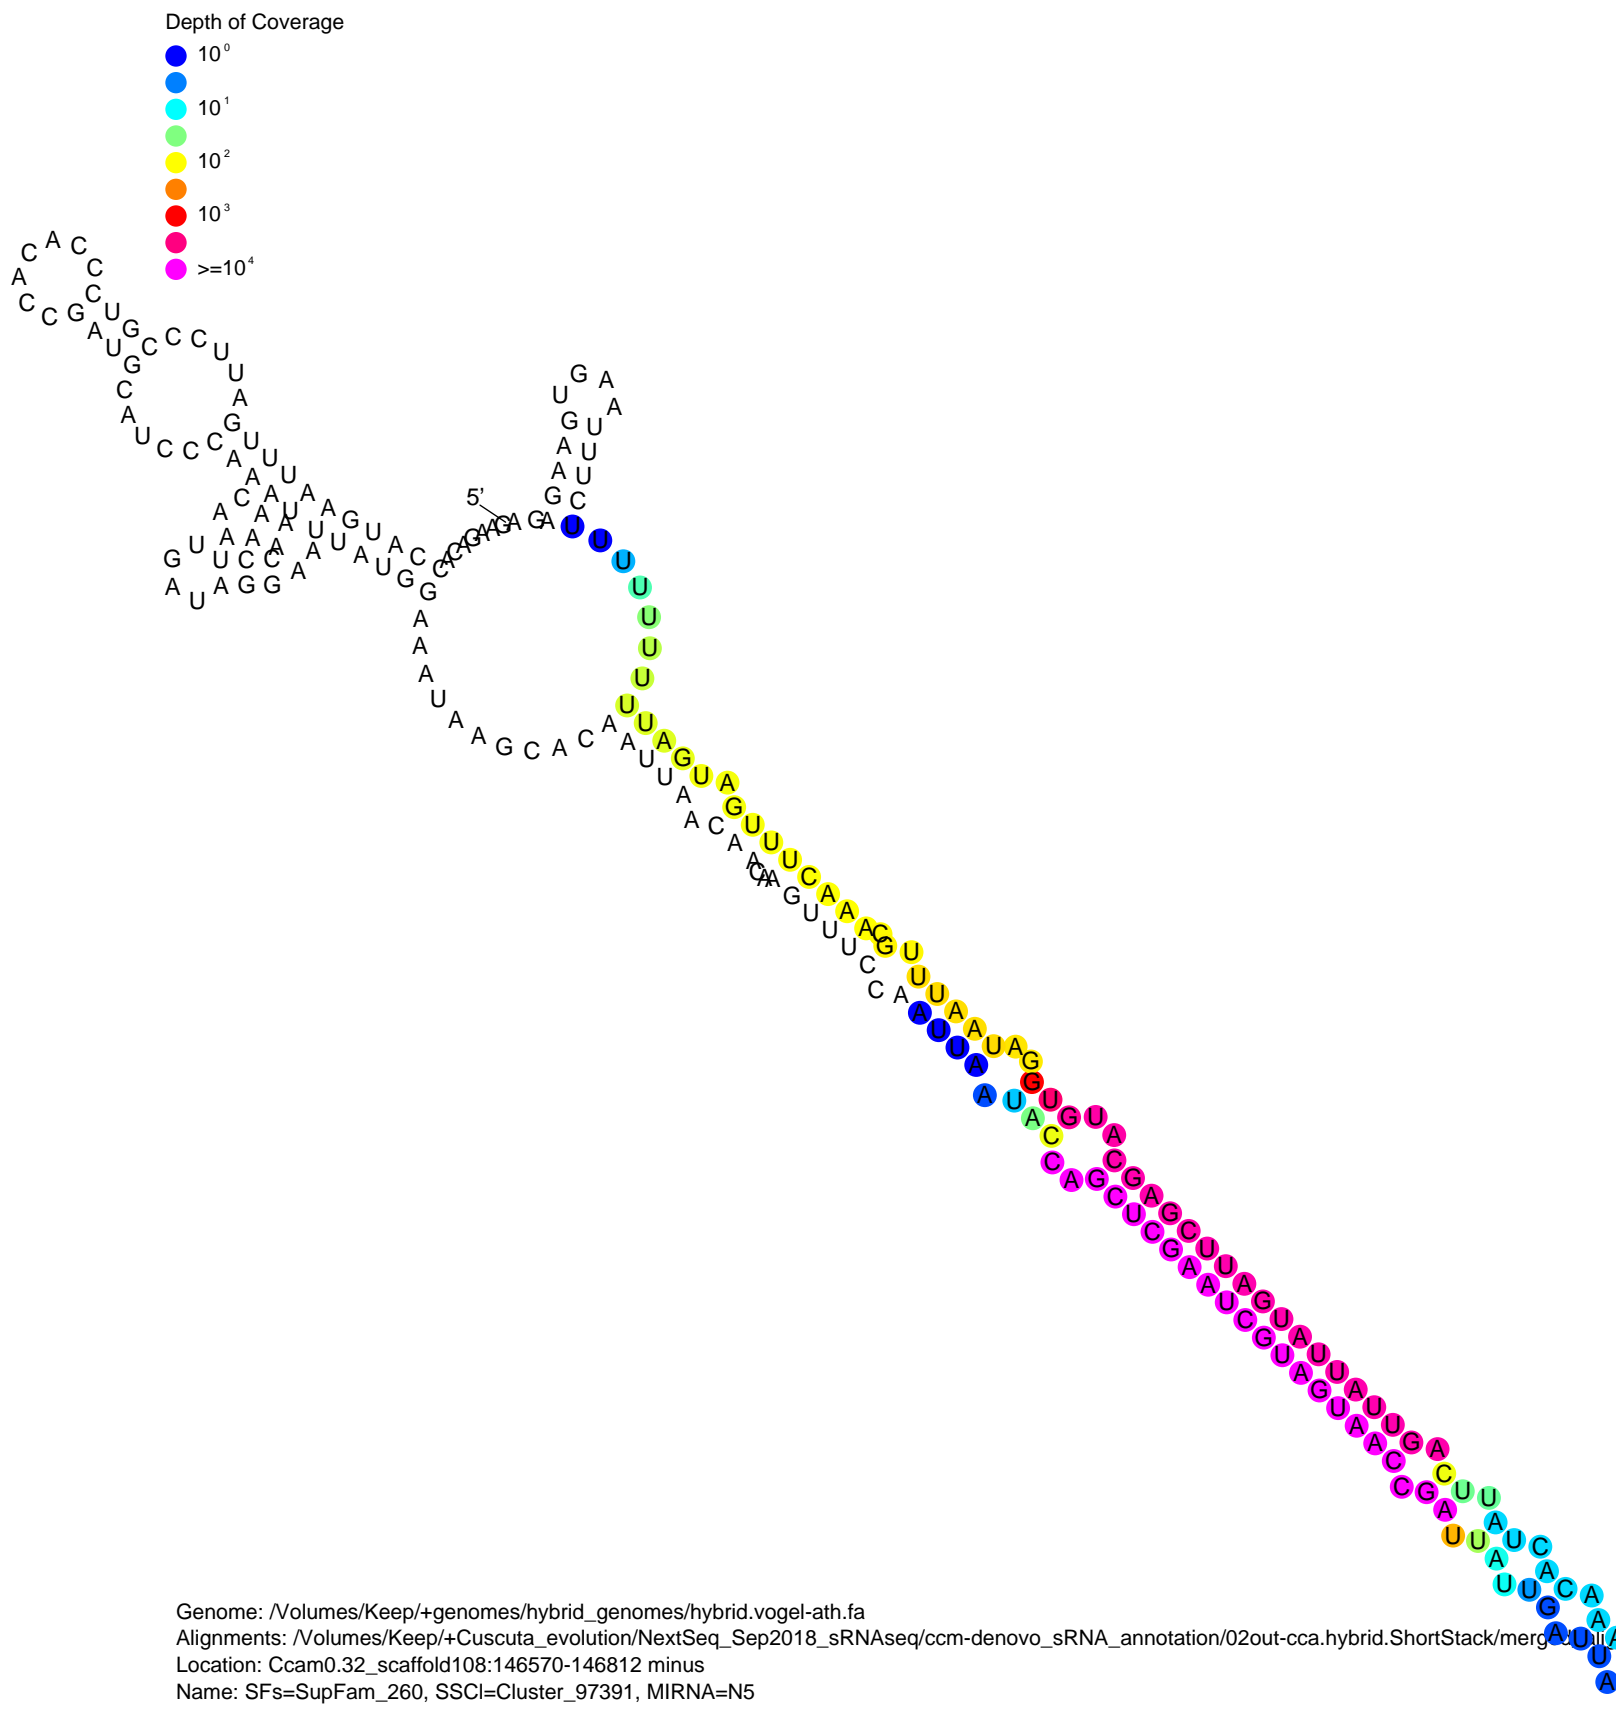

Genome: /Volumes/Keep/+genomes/hybrid\_genomes/hybrid.vogel-ath.fa

Alignments: /Volumes/Keep/+Cuscuta\_evolution/NextSeq\_Sep2018\_sRNAseq/cem-denovo\_sRNA\_annotation/02out-cca.hybrid.ShortStack/merged

Location: Ccam0.32\_scaffold108:146570-146812 minus

Name: SFs=SupFam\_260, SSCI=Cluster\_97391, MIRNA=N5

Depth of Coverage

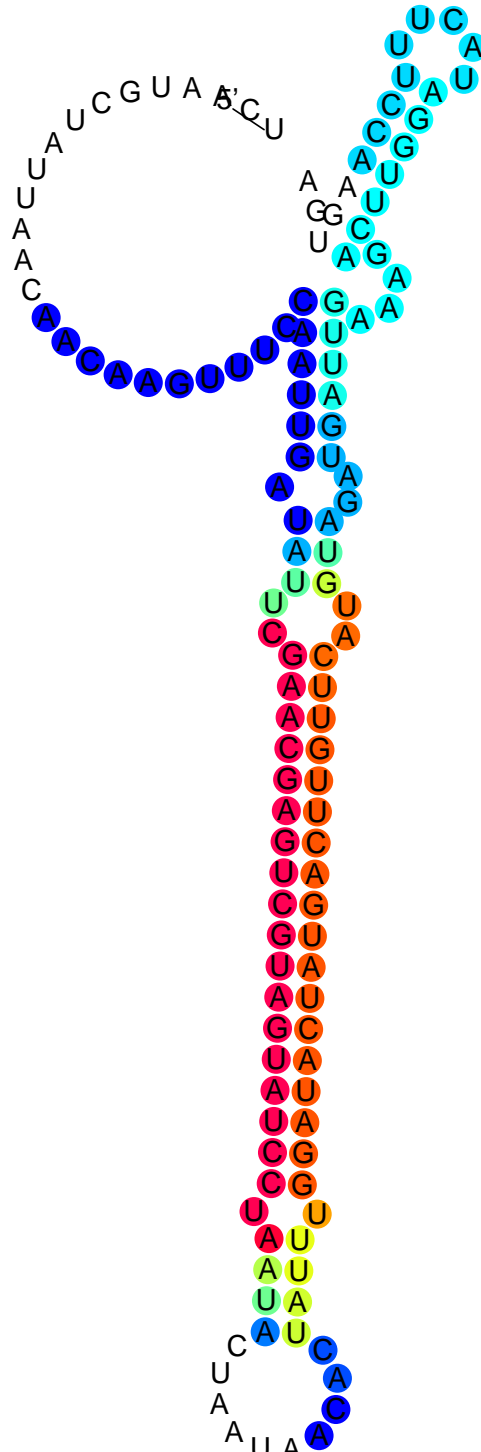

Genome: /Volumes/Keep/+genomes/hybrid\_genomes/hybrid.vogel-ath.fa

Alignments: /Volumes/Keep/+Cuscuta\_evolution/NextSeq\_Sep2018\_sRNAseq/Act1\_denovo\_sRNA\_annotation/02out-cca.hybrid.ShortStack/merged\_alignments

Location: Ccam0.32\_scaffold108:215737-215890 plus

Name: SFs=SupFam\_60,SupFam\_18, SSCI=Cluster\_97421, MIRNA=N5

U U  
U A  
U A  
U A  
C G  
G U  
U A  
U A  
A A  
A A

Depth of Coverage

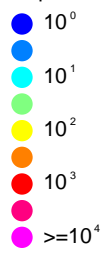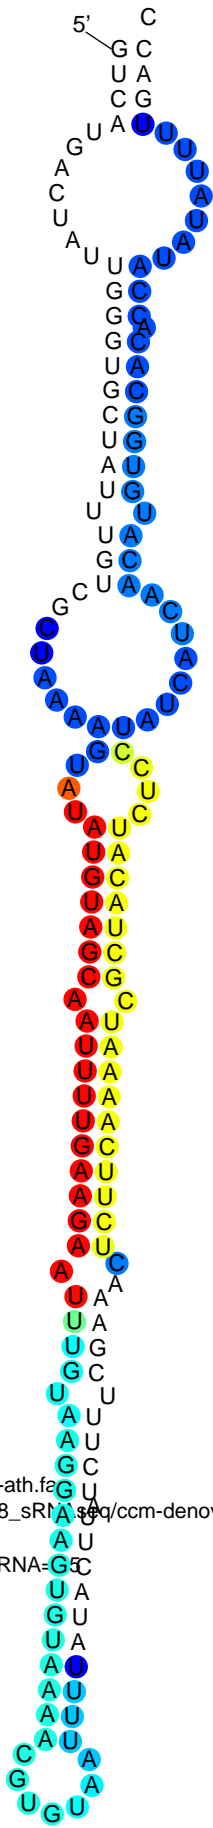

Genome: /Volumes/Keep/+genomes/hybrid\_genomes/hybrid.vogel-ath.fa  
 Alignments: /Volumes/Keep/+Cuscuta\_evolution/NextSeq\_Sep2018\_sRNA\_seq/ccm-denovo\_sRNA\_annotation/02out-cca.hybrid.ShortStack/merged\_alignments  
 Location: Ccam0.32\_scaffold110:33478-33638 minus  
 Name: SFs=SupFam\_285,SupFam\_328, SSCI=Cluster\_98199, MIRNA=5-UTR

Depth of Coverage

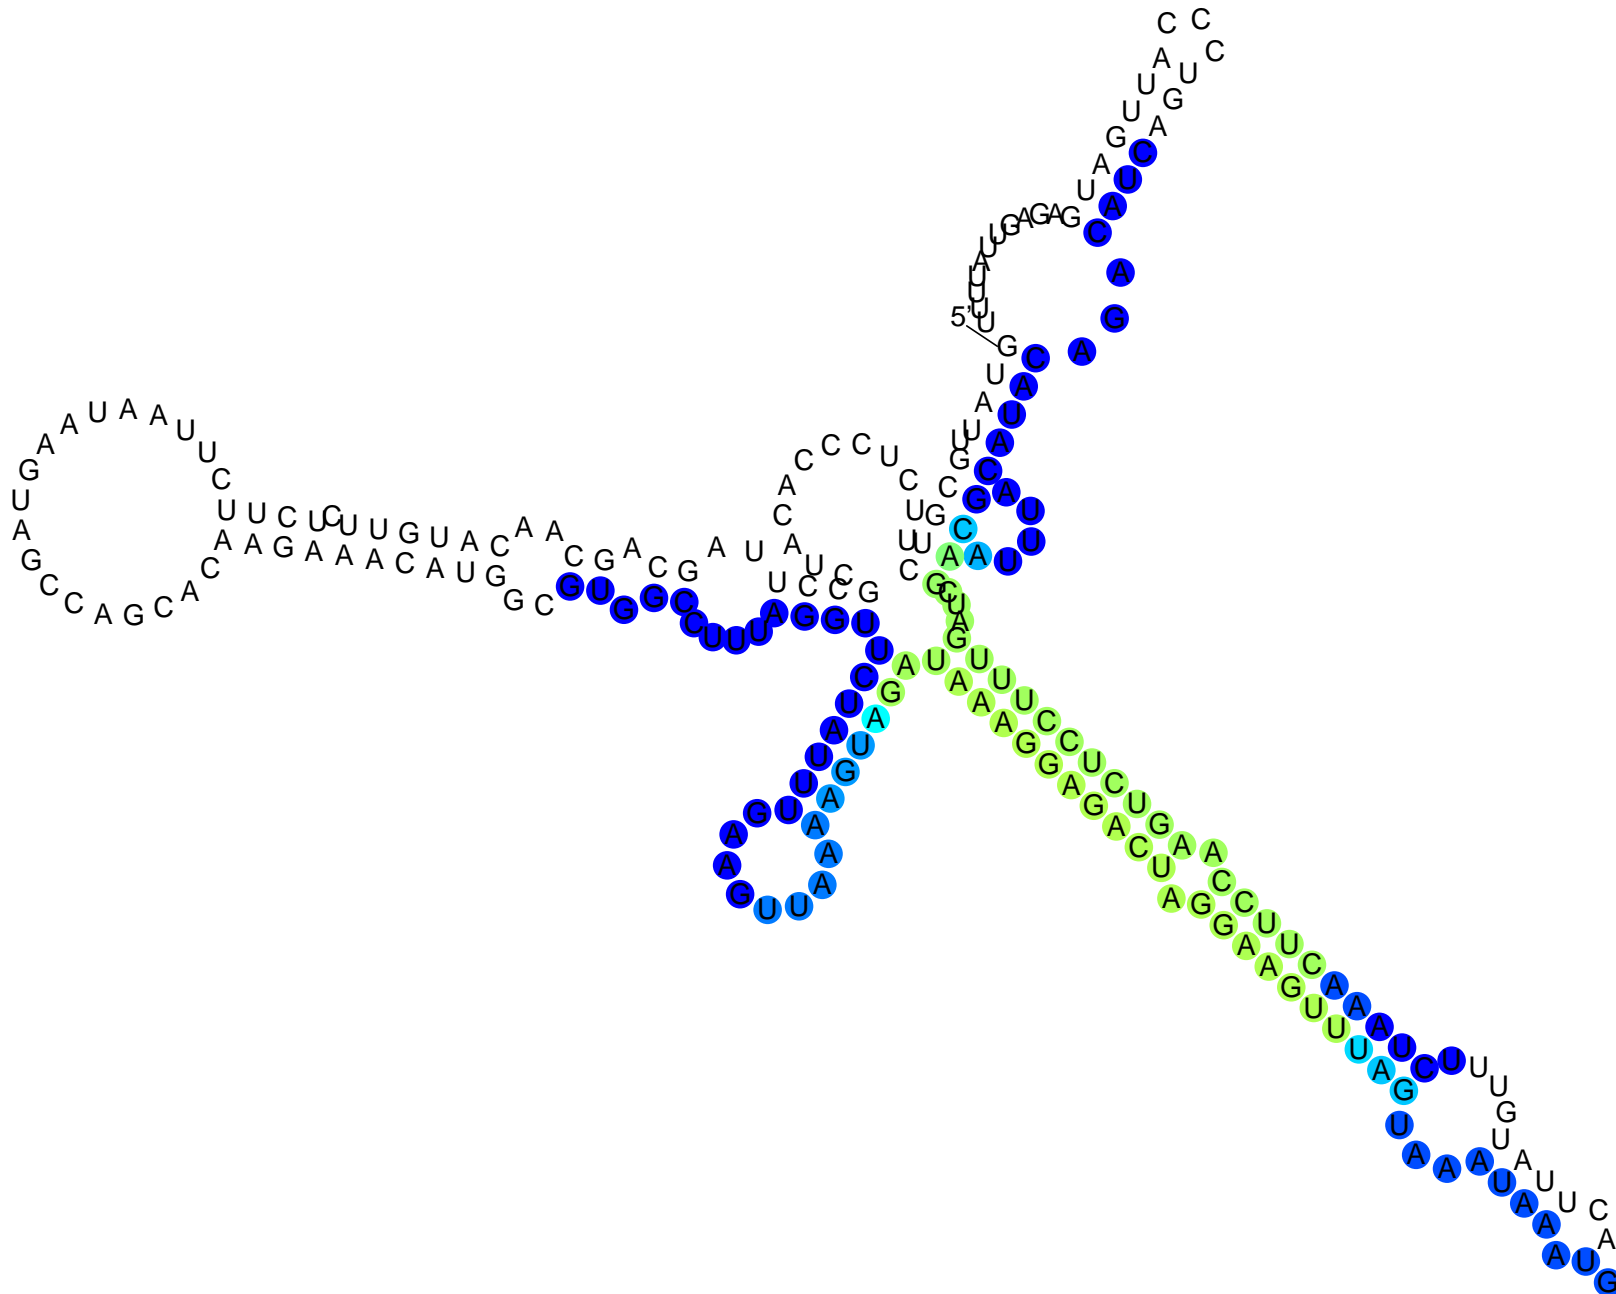

Genome: /Volumes/Keep/+genomes/hybrid\_genomes/hybrid.vogel-ath.fa

Alignments: /Volumes/Keep/+Cuscuta\_evolution/NextSeq\_Sep2018\_sRNAseq/ccm-denovo\_sRNA\_annotation/02out-cca.hybrid.ShortStack/merged\_alignments

Location: Ccam0.32\_scaffold110:66589-66830 plus

Name: SFs=SupFam\_339, SSCI=Cluster\_98206, MIRNA=N14





Depth of Coverage

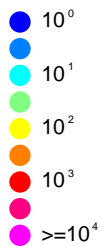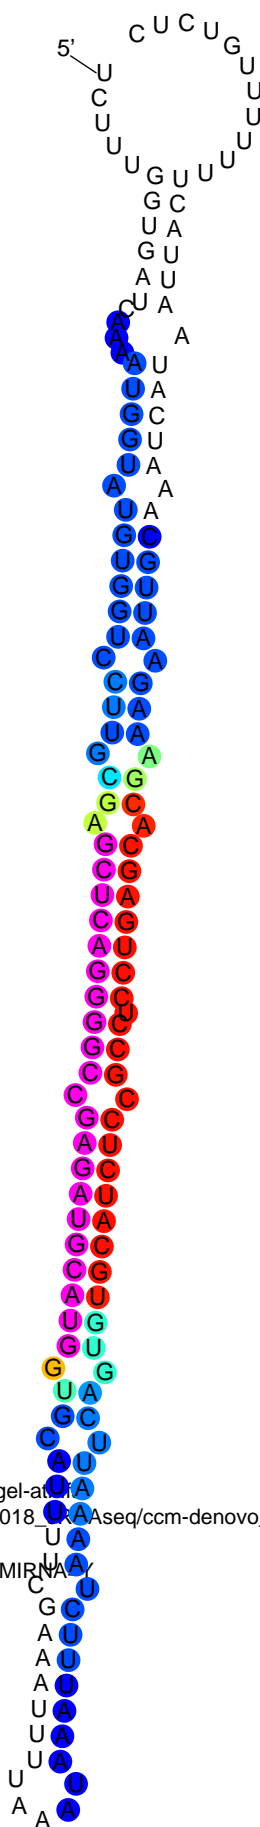

Genome: /Volumes/Keep/+genomes/hybrid\_genomes/hybrid.vogel-at-  
Alignments: /Volumes/Keep/+Cuscuta\_evolution/NextSeq\_Sep2018\_  
Location: Ccam0.32\_scaffold110:879129-879283 plus  
Name: SFs=SupFam\_261,SupFam\_282,SSCI=Cluster\_98537, MIRNA/

Depth of Coverage

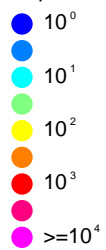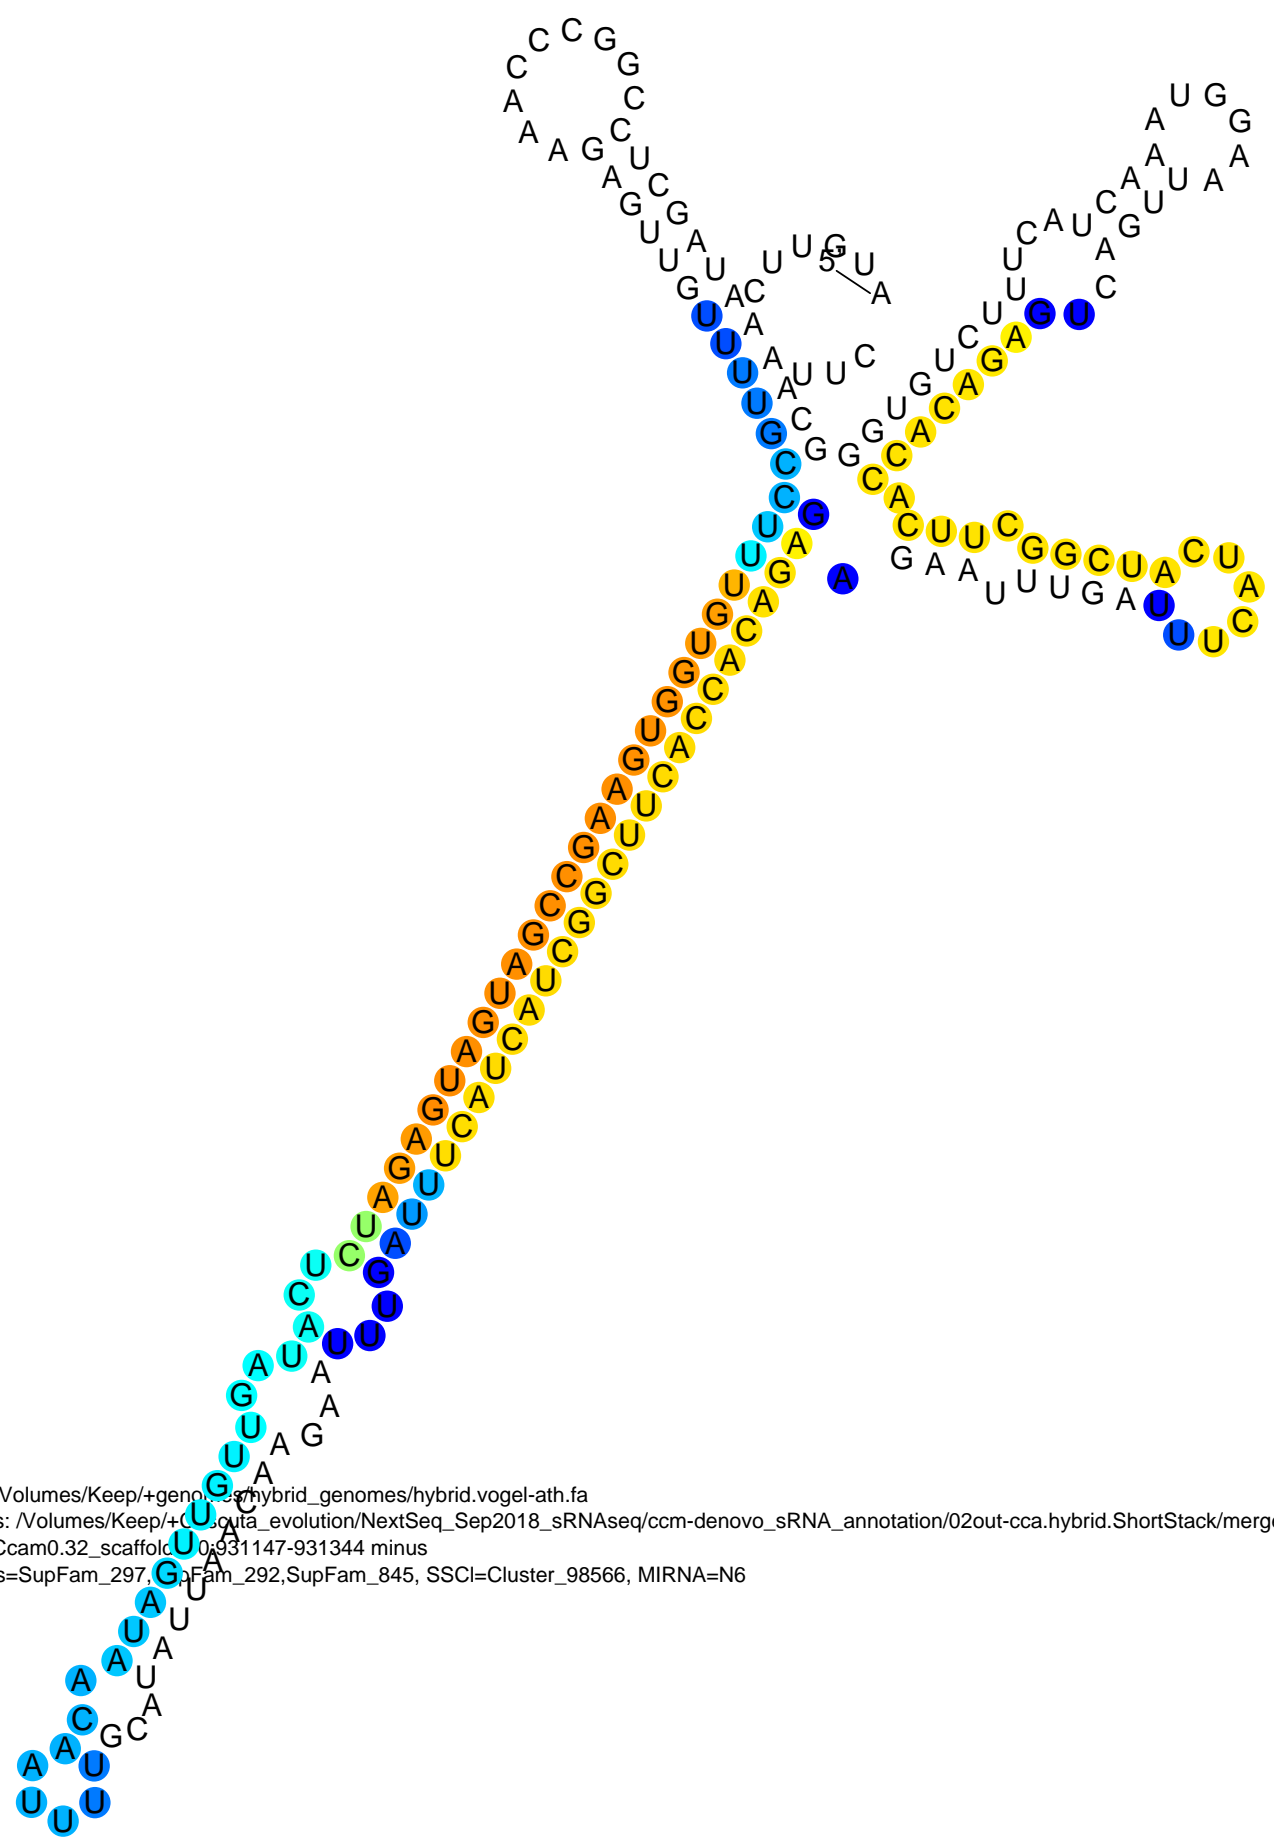

Genome: /Volumes/Keep/+genome/hybrid\_genomes/hybrid.vogel-ath.fa

Alignments: /Volumes/Keep/+genome/evolution/NextSeq\_Sep2018\_sRNAseq/cem-denovo\_sRNA\_annotation/02out-cca.hybrid.ShortStack/merged\_alignments

Location: Ccam0.32\_scaffold0931147-931344 minus

Name: SFs=SupFam\_297, SupFam\_292, SupFam\_845, SSCI=Cluster\_98566, MIRNA=N6

Depth of Coverage

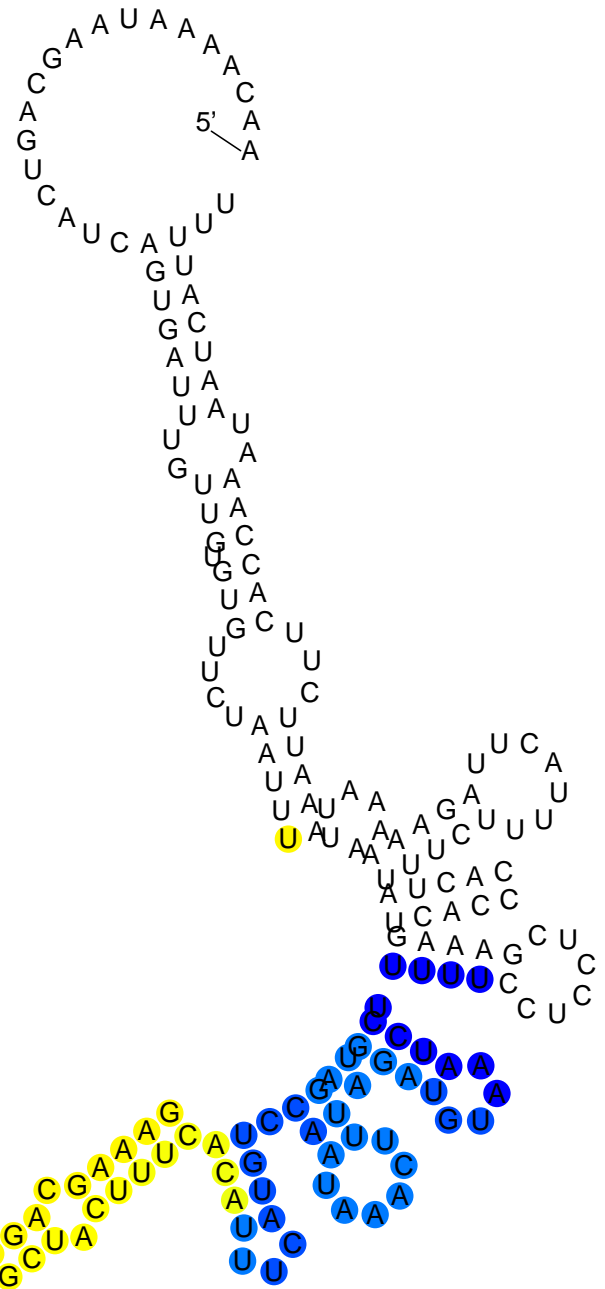

Genome: /Volumes/Keep/+genomes/hybrid\_genomes/m...vogel-ath.fa  
Alignments: /Volumes/Keep/+Cuscuta\_evolution/Nov15\_Sep2018\_sRNAseq/cem-denovo\_sRNA\_annotation/02out-cca.hybrid.ShortStack/merged\_alignments  
Location: Ccam0.32\_scaffold110:1320117-1320341  
Name: SFs=SupFam\_293, SSCI=Cluster\_987, MIRNA=N13

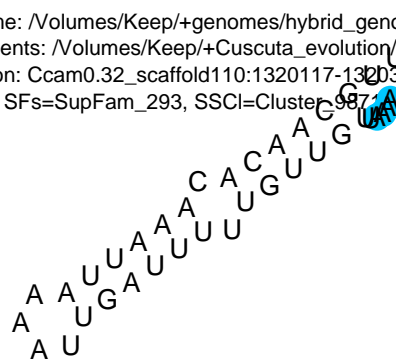

Depth of Coverage



5'—A U  
A U  
G U  
U A  
A G  
U G

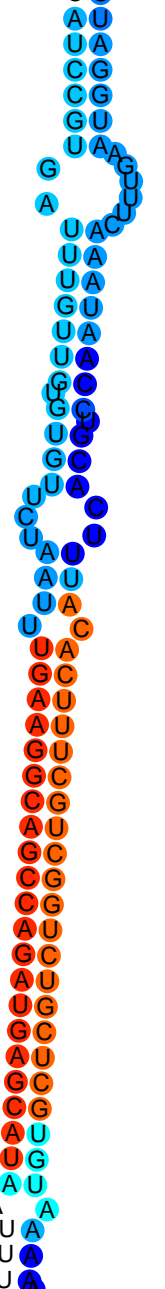

Genome: /Volumes/Keep/+genomes/hybrid\_genomes/hybrid.vogel-ath.fc  
 Alignments: /Volumes/Keep/+Cuscuta\_evolution/NextSeq\_Sep2018\_sRNA/seq/ccm-denovo\_sRNA\_annotation/02out-cca.hybrid.ShortStack/merged\_alignments  
 Location: Ccam0.32\_scaffold110:1327521-1327678 plus  
 Name: SFs=SupFam\_280,SupFam\_293, SSCI=Cluster\_98714, MIRNA

A U  
U A  
U A  
G U  
G U  
A U  
A U  
C A  
A U  
A U  
A U  
U A  
U G  
A U  
A U  
A A











Depth of Coverage

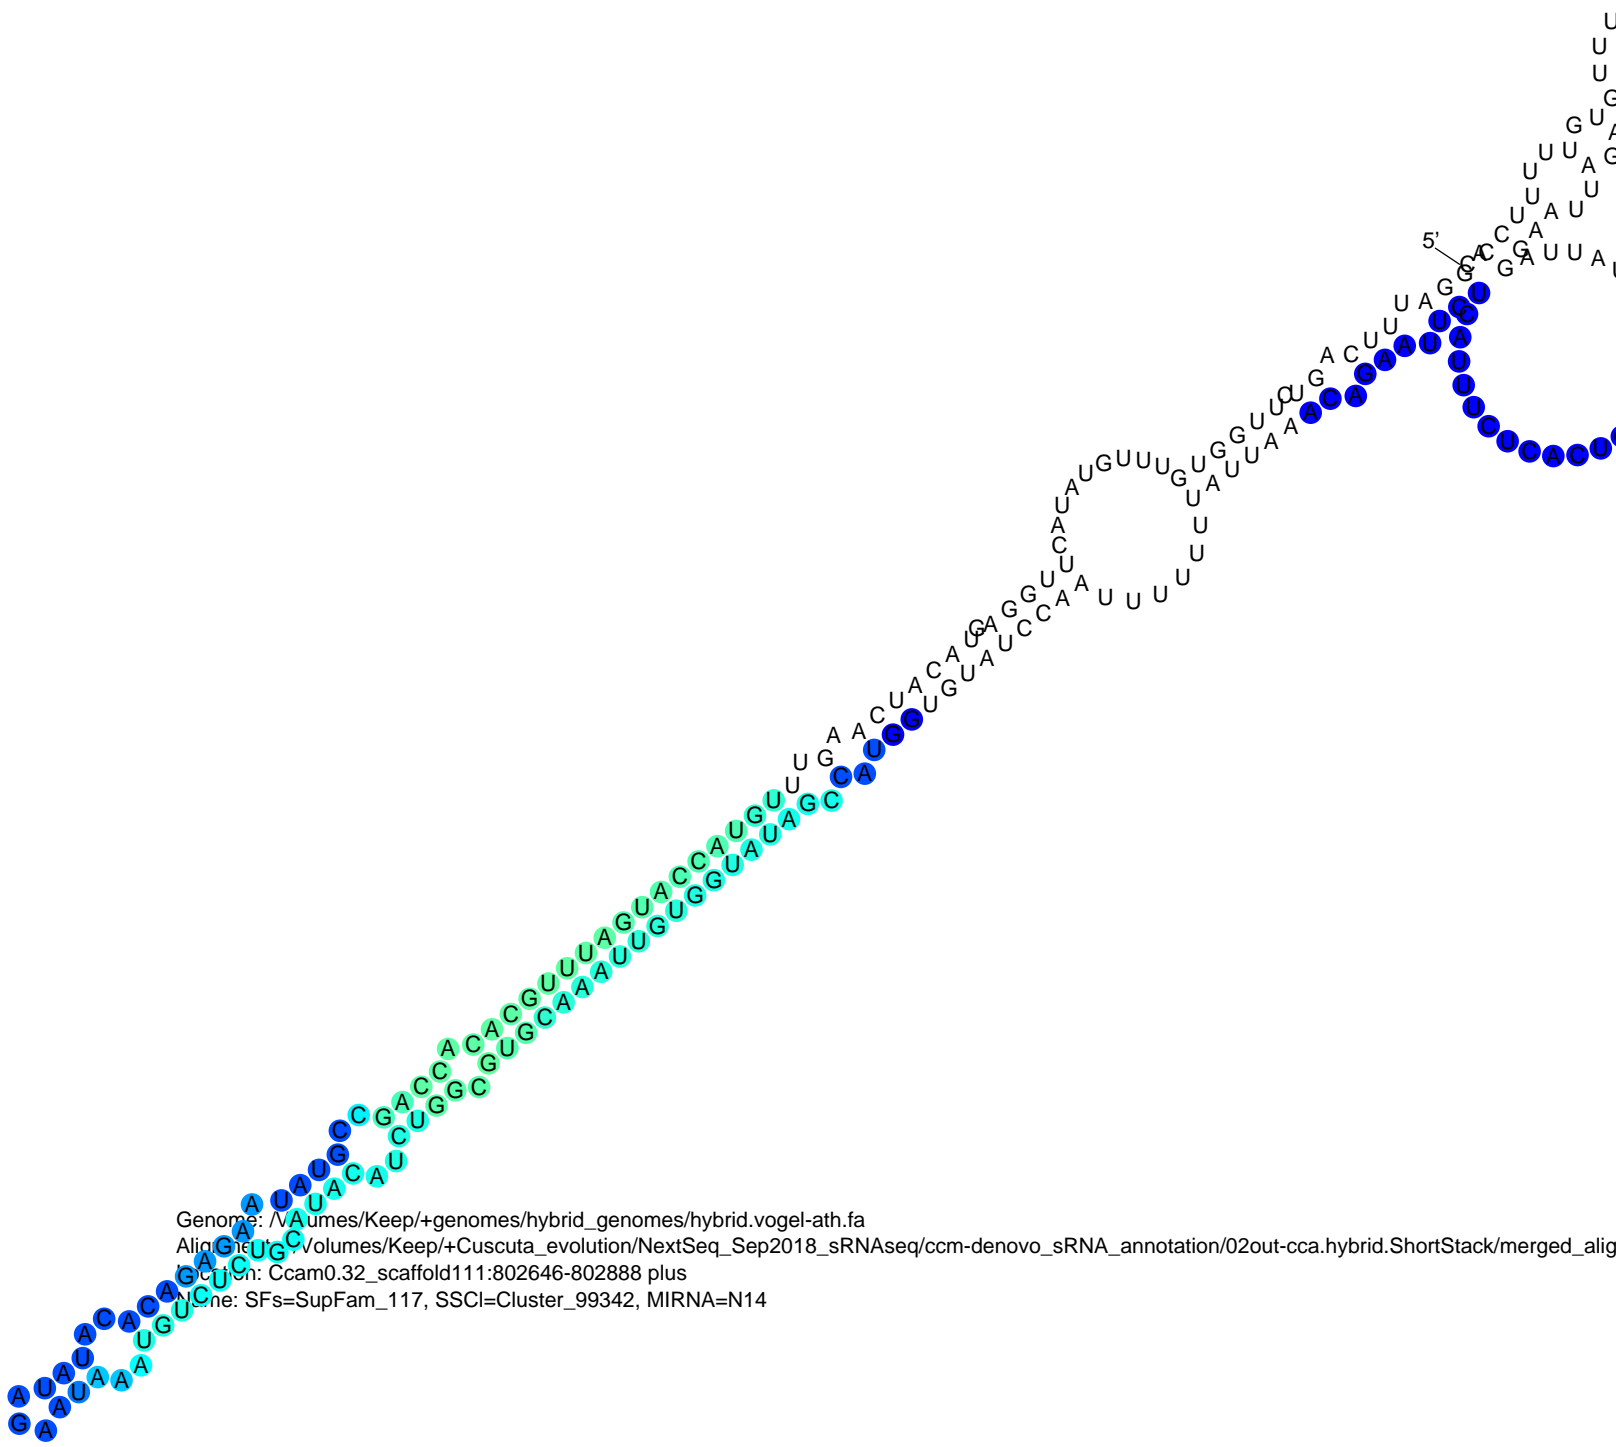

Supplement: elife-49750-supp5.pdf [file elife-49750-supp5.pdf]
