# Supplementary material for: Compensatory sequence variation between trans-species small RNAs and their target sites
Source: PubMed Central journal article supplement (PMC6917502; doi:10.7554/elife.49750), 2019-12-17

**Allenscore:** 2

**Target Interaction:**

5'- GGAUUGAAGCUAAUUGAUCCU AT3G52870.1  
||| ||||||||||||||||||||  
3'- CCGAACUUCGAUAACUAGGU CI\_cpe-2017\_3761

**Target Site:** 559

**Superfamily:** SupFam\_188

**miRNAin ccm:** N/A

**Published name:** N/A

**Confirmed Targeting**

2nd-siRNA NanoPARE

|                 |                 |
|-----------------|-----------------|
| <i>ccm</i>      | <i>ccm</i>      |
| <i>cpe-2015</i> | <i>cpe-2015</i> |
| <i>cpe-2017</i> |                 |
| <i>cgr-dp</i>   | <i>cgr-dp</i>   |
| <i>cgr-pm</i>   |                 |
| <i>cgr-mass</i> |                 |
| <i>cin</i>      | <i>cin</i>      |

**IQ\_calmodulin-binding\_motif\_family\_prote**

AT3G52870 - CI\_cpe-2017\_3761

**Secondary siRNAs**

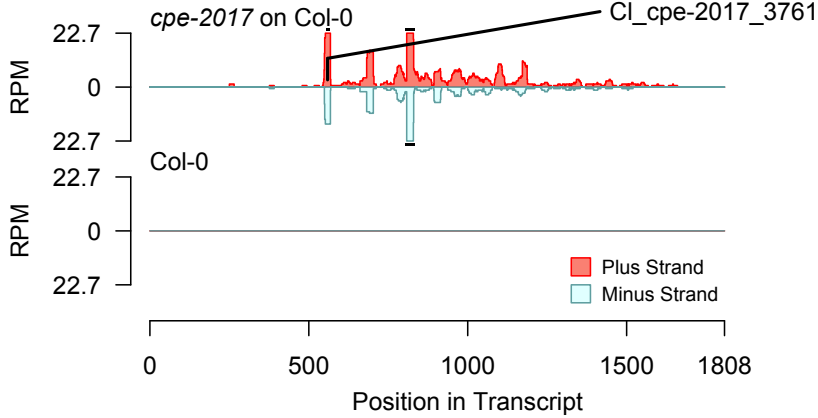

Degradome hits not found for sRNA

**2nd siRNAs: Phase diagram**

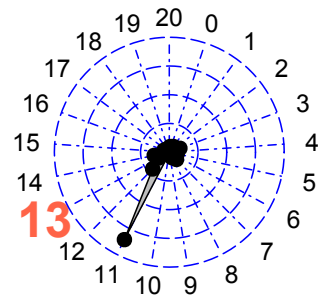

**2nd siRNAs: Size distribution**

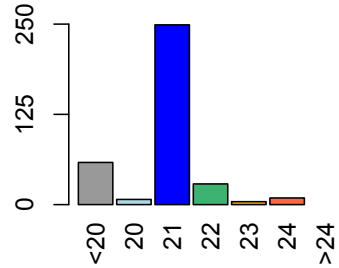

**Allenscore:** 2

**Target Interaction:**

5'- CUCCUGAGCAUUCUGCUGCUG AT4G00830.1  
          |||||          |||||          |||||  
3'- AAGGACUAGUAAGACGACGAC CI\_cgr-dp\_538

**Target Site:** 1081

**Superfamily:** SupFam\_490

**miRNAin ccm:** N/A

**Published name:** N/A

**Confirmed Targeting**

2nd-siRNA    NanoPARE

|                 |                 |
|-----------------|-----------------|
| <i>ccm</i>      | <i>ccm</i>      |
| <i>cpe-2015</i> | <i>cpe-2015</i> |
| <i>cpe-2017</i> |                 |
| <i>cgr-dp</i>   | <i>cgr-dp</i>   |
| <i>cgr-pm</i>   |                 |
| <i>cgr-mass</i> |                 |
| <i>cin</i>      | <i>cin</i>      |

## LIF2

AT4G00830 - CI\_cgr-dp\_538

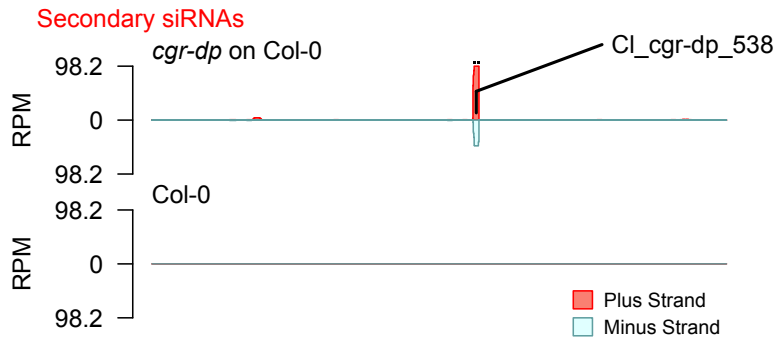

Diff. Exp. secondary siRNA  
locus not found

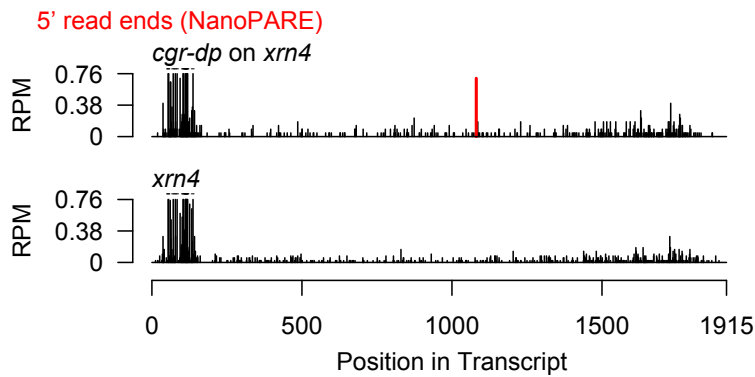



**Allenscore:** 4

**Target Interaction:**

5'- GUGUGCGAUGAAAGAAGUUGAG AT5G66850.1  
| | | | | : | | : | | | | | | | | | :  
3'- CACACGUUUAUUUCUUC - ACUU CI\_cgr-dp\_5622

**Target Site:** 1391

**Superfamily:** SupFam\_157

**miRNAin ccm:** N/A

**Published name:** N/A

**Confirmed Targeting**

2nd-siRNA NanoPARE

|                 |                 |
|-----------------|-----------------|
| <i>ccm</i>      | <i>ccm</i>      |
| <i>cpe-2015</i> | <i>cpe-2015</i> |
| <i>cpe-2017</i> |                 |
| <i>cgr-dp</i>   | <i>cgr-dp</i>   |
| <i>cgr-pm</i>   |                 |
| <i>cgr-mass</i> |                 |
| <i>cin</i>      | <i>cin</i>      |

## MAPKKK5

AT5G66850 - CI\_cgr-dp\_5622

**Secondary siRNAs**

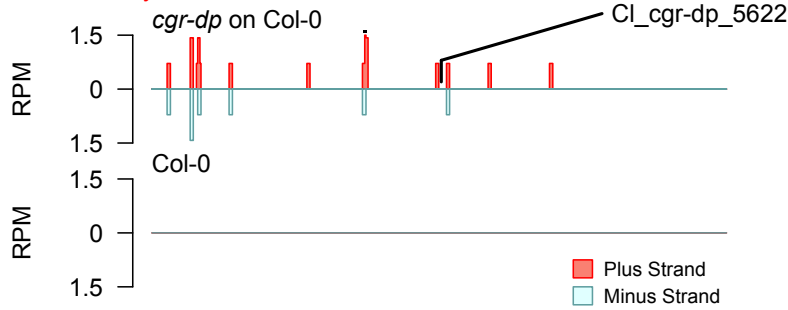

Diff. Exp. secondary siRNA locus not found

**5' read ends (NanoPARE)**

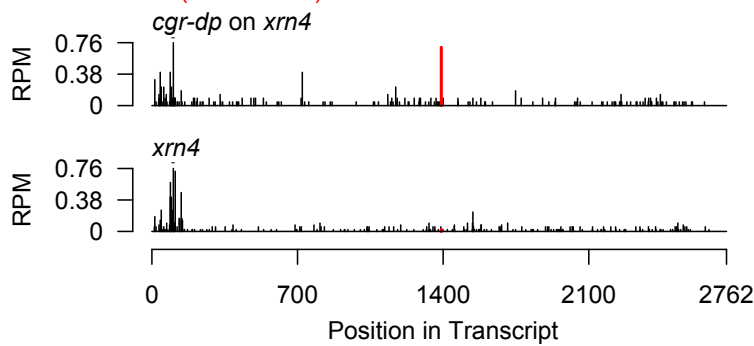





Allenscore: 5.5

**Target Interaction:**

5'- GAGAUGUUGUCCACCACCA AT3G45640.1  
: ||| ||| : ||| ||| ||| |||  
3'- UUCUACAAUAAGGAGGCGGU CI\_cgr-dp\_22

Target Site: 659

Superfamily: SupFam\_203

miRNAin ccm: N/A

Published name: N/A

**Confirmed Targeting**

2nd-siRNA NanoPARE

|                 |                 |
|-----------------|-----------------|
| <i>ccm</i>      | <i>ccm</i>      |
| <i>cpe-2015</i> | <i>cpe-2015</i> |
| <i>cpe-2017</i> |                 |
| <i>cgr-dp</i>   | <i>cgr-dp</i>   |
| <i>cgr-pm</i>   |                 |
| <i>cgr-mass</i> |                 |
| <i>cin</i>      | <i>cin</i>      |

**MPK3**

AT3G45640 - CI\_cgr-dp\_22

**Secondary siRNAs**

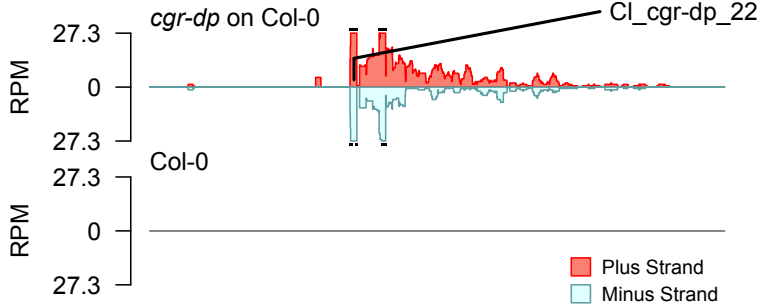

**5' read ends (NanoPARE)**

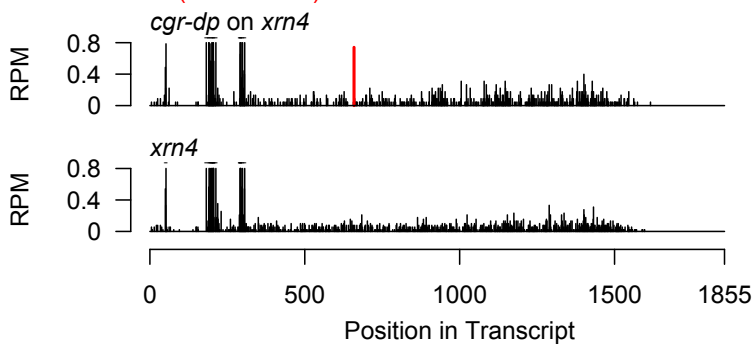

**2nd siRNAs: Phase diagram**

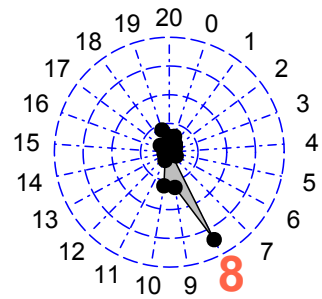

**2nd siRNAs: Size distribution**

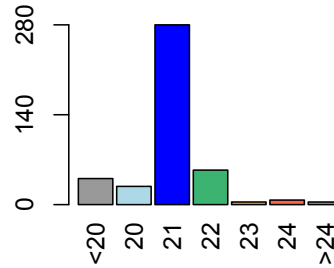

**Allenscore:** 5.5

**Target Interaction:**

5'- GAUGCUAAGCGUACGCUUCGUGA AT3G45640.1  
 |||:|||||:|||||:|||||:|||||  
 3'- CUACGGUUCGCCUGUGAAGC - CU CI\_cin\_3787

**Target Site:** 591

**Superfamily:** SupFam\_1385

**miRNAin ccm:** N/A

**Published name:** N/A

**Confirmed Targeting**

2nd-siRNA NanoPARE

|                 |                 |
|-----------------|-----------------|
| <i>ccm</i>      | <i>ccm</i>      |
| <i>cpe-2015</i> | <i>cpe-2015</i> |
| <i>cpe-2017</i> |                 |
| <i>cgr-dp</i>   | <i>cgr-dp</i>   |
| <i>cgr-pm</i>   |                 |
| <i>cgr-mass</i> |                 |
| <i>cin</i>      | <i>cin</i>      |

**MPK3**

AT3G45640 - CI\_cin\_3787

**Secondary siRNAs**

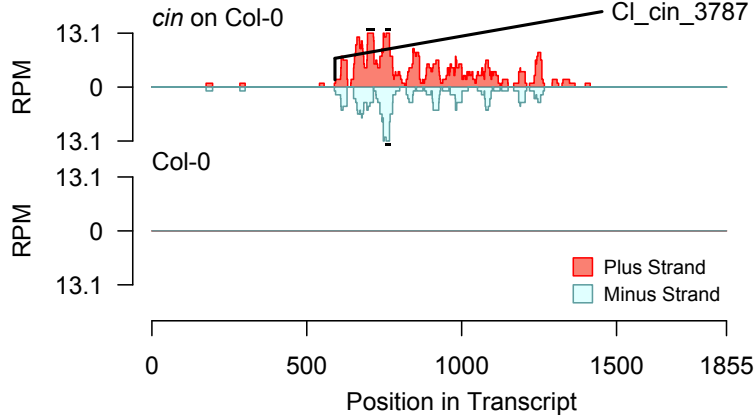

Degradome hits not found for sRNA

**2nd siRNAs: Phase diagram**

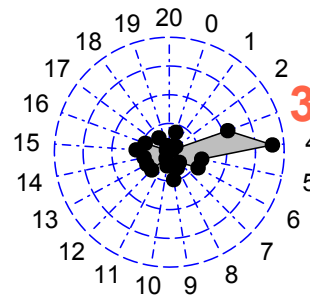

**2nd siRNAs: Size distribution**

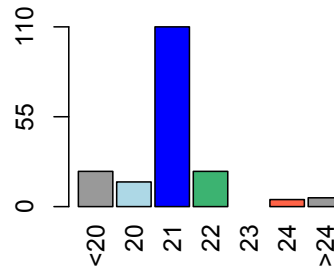

Allescore: 6

**Target Interaction:**

```

5'- GCUCUUGGAAGAAGAUGAAAGGCUCC AT4G02400.1
   ||| | | | | | | | | | | | | | | | | | | | | | | | | | | |
3'- UGGG - - - CUUCUUCUACUUUUCGAGU CI_cgr-dp_279
    
```

Target Site: 1850

Superfamily: SupFam\_37

miRNAin ccm: N/A

Published name: N/A

**Confirmed Targeting**

| 2nd-siRNA       | NanoPARE        |
|-----------------|-----------------|
| <i>ccm</i>      | <i>ccm</i>      |
| <i>cpe-2015</i> | <i>cpe-2015</i> |
| <i>cpe-2017</i> |                 |
| <i>cgr-dp</i>   | <i>cgr-dp</i>   |
| <i>cgr-pm</i>   |                 |
| <i>cgr-mass</i> |                 |
| <i>cin</i>      | <i>cin</i>      |

**U3\_ribonucleoprotein\_family\_protein**

AT4G02400 - CI\_cgr-dp\_279

Secondary siRNAs

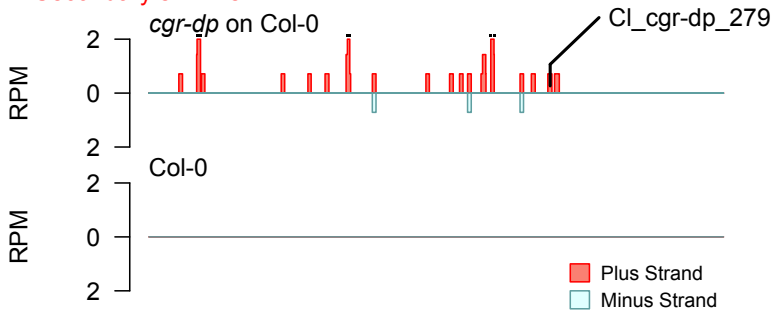

Diff. Exp. secondary siRNA locus not found

5' read ends (NanoPARE)

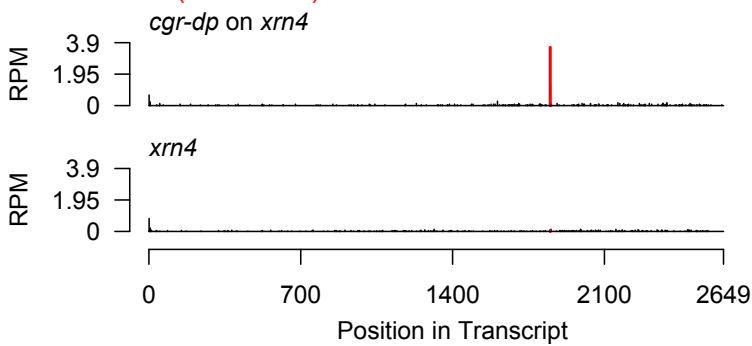

**Allenscore:** 3

**Target Interaction:**

5'- GGAAGAAGAUGAAAGGCUCC AT4G02400.1  
          |||                          :|  
3'- GCUUCUUCUACUUUCGAGU CI\_cgr-dp\_37384

**Target Site:** 1850

**Superfamily:** SupFam\_37

**miRNAin ccm:** N/A

**Published name:** N/A

**Confirmed Targeting**

| 2nd-siRNA       | NanoPARE        |
|-----------------|-----------------|
| <i>ccm</i>      | <i>ccm</i>      |
| <i>cpe-2015</i> | <i>cpe-2015</i> |
| <i>cpe-2017</i> |                 |
| <i>cgr-dp</i>   | <i>cgr-dp</i>   |
| <i>cgr-pm</i>   |                 |
| <i>cgr-mass</i> |                 |
| <i>cin</i>      | <i>cin</i>      |

## U3\_ribonucleoprotein\_family\_protein

AT4G02400 - CI\_cgr-dp\_37384

**Secondary siRNAs**

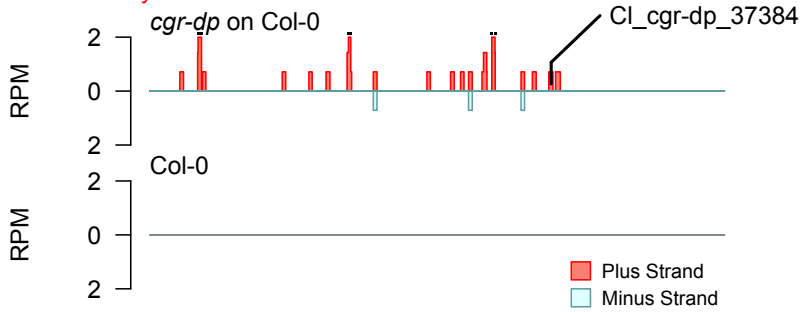

Diff. Exp. secondary siRNA locus not found

**5' read ends (NanoPARE)**

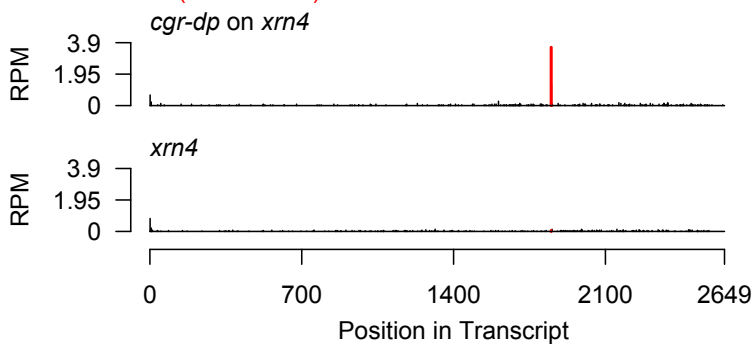

**Allenscore:** 3.5

**Target Interaction:**

5'- AGAGGAGGAGGAGGAAGACUA AT3G09070.1  
| | | | | : | | | | | | | | | | | | | | | |  
3'- UGUCCUCUUCAUCCUUCUGAU CI\_cin\_11140

**Target Site:** 1028

**Superfamily:** SupFam\_1431

**miRNAin ccm:** N/A

**Published name:** N/A

**Confirmed Targeting**

*2nd-siRNA* *NanoPARE*

|                 |                 |
|-----------------|-----------------|
| <i>ccm</i>      | <i>ccm</i>      |
| <i>cpe-2015</i> | <i>cpe-2015</i> |
| <i>cpe-2017</i> |                 |
| <i>cgr-dp</i>   | <i>cgr-dp</i>   |
| <i>cgr-pm</i>   |                 |
| <i>cgr-mass</i> |                 |
| <i>cin</i>      | <i>cin</i>      |

**OPS**

AT3G09070 - CI\_cin\_11140

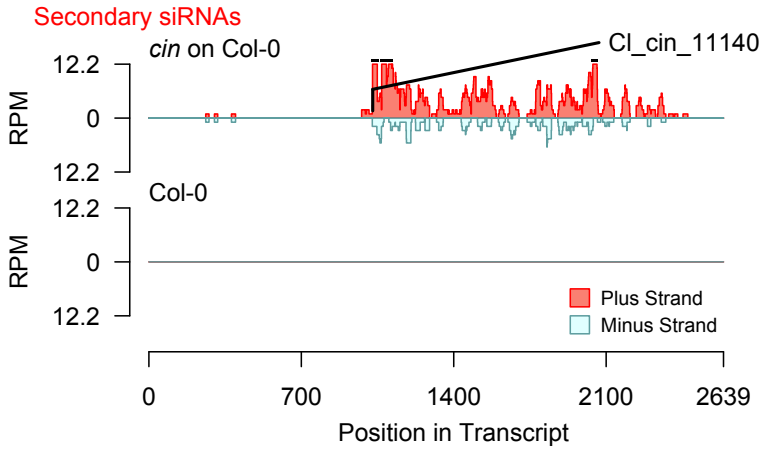

Degradome hits not found for sRNA

**2nd siRNAs: Phase diagram**

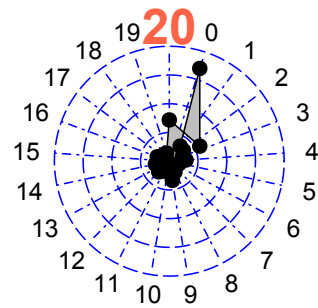

**2nd siRNAs: Size distribution**

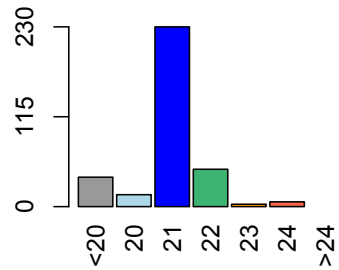

**Allenscore:** 4

**Target Interaction:**

```
5'- UUGGCUACUUAGCUCCAGAGUA   AT1G21590.1  
   ||| | | | | | | | | | | | | | | |  
3'- AACCAUGAAUCUAGGUCUCAC   CI_cpe-2015_439
```

**Target Site:** 2056

**Superfamily:** SupFam\_257

**miRNAin ccm:** N/A

**Published name:** N/A

**Confirmed Targeting**

*2nd-siRNA*    *NanoPARE*

|                 |                 |
|-----------------|-----------------|
| <i>ccm</i>      | <i>ccm</i>      |
| <i>cpe-2015</i> | <i>cpe-2015</i> |
| <i>cpe-2017</i> |                 |
| <i>cgr-dp</i>   | <i>cgr-dp</i>   |
| <i>cgr-pm</i>   |                 |
| <i>cgr-mass</i> |                 |
| <i>cin</i>      | <i>cin</i>      |

**Protein\_kinase\_superfamily\_protein**

AT1G21590 - CI\_cpe-2015\_439

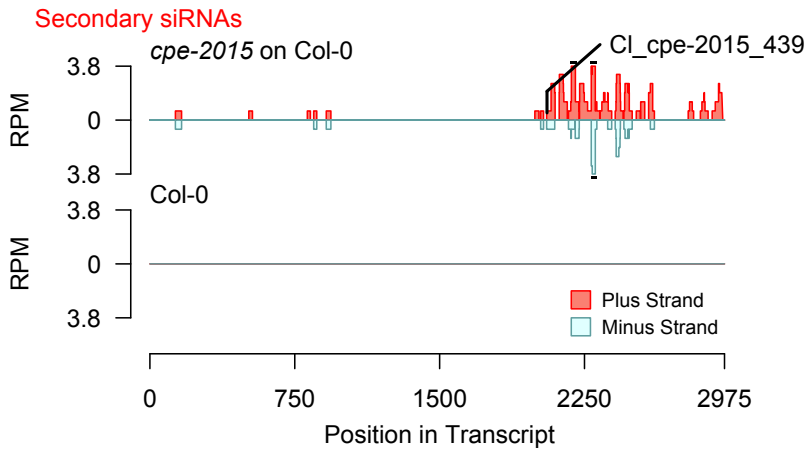

2nd siRNAs: Phase diagram

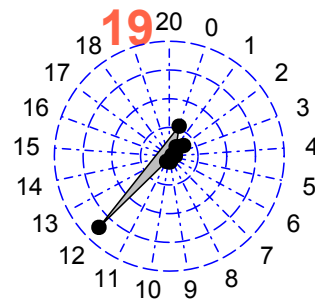

2nd siRNAs: Size distribution

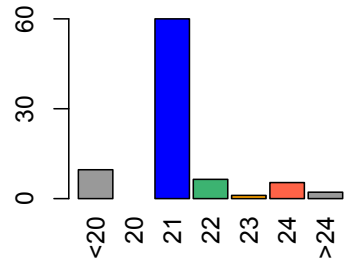

Degradome hits not found for sRNA

Allenscore: 4.5

**Target Interaction:**

```

5'- GGCUACUUAGCUCCAGAGUA  AT1G21590.1
   | | | | | | | | | | | | |
3'- UCAAUGAAUCUAGGUCUCAC  CI_cpe-2015_45087
  
```

Target Site: 2056

Superfamily: SupFam\_257

miRNAin ccm: N/A

Published name: N/A

**Confirmed Targeting**

2nd-siRNA NanoPARE

|                 |                 |
|-----------------|-----------------|
| <i>ccm</i>      | <i>ccm</i>      |
| <i>cpe-2015</i> | <i>cpe-2015</i> |
| <i>cpe-2017</i> |                 |
| <i>cgr-dp</i>   | <i>cgr-dp</i>   |
| <i>cgr-pm</i>   |                 |
| <i>cgr-mass</i> |                 |
| <i>cin</i>      | <i>cin</i>      |

**Protein\_kinase\_superfamily\_protein**

AT1G21590 - CI\_cpe-2015\_45087

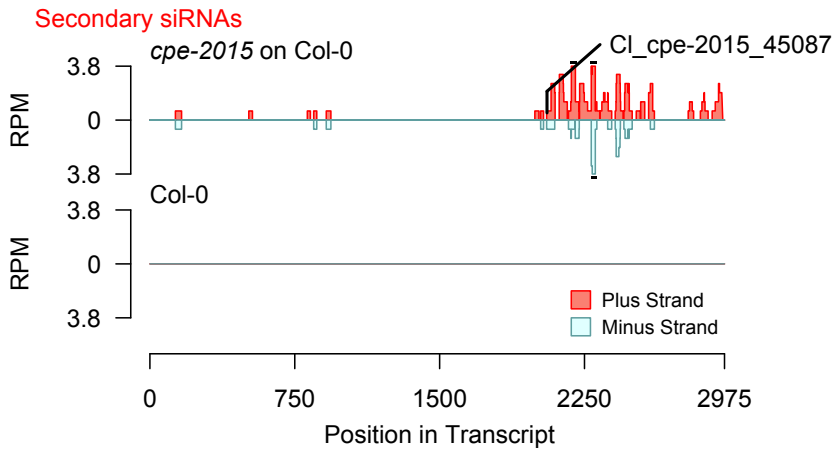

Degradome hits not found for sRNA

**2nd siRNAs: Phase diagram**

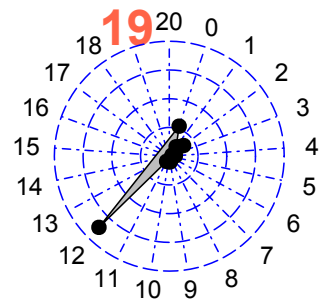

**2nd siRNAs: Size distribution**

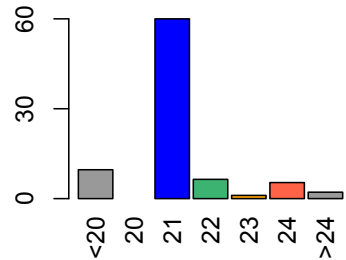

**Allenscore:** 4

**Target Interaction:**

5'- UUGGCUACUUAGCUCCAGAGUA AT1G21590.1  
 ||||| ||||| ||||| ||||| |||||  
 3'- AACCAAUGAAUCUAGGUCUCAC CI\_cpe-2017\_503

**Target Site:** 2056

**Superfamily:** SupFam\_257

**miRNAin ccm:** N/A

**Published name:** N/A

**Confirmed Targeting**

| 2nd-siRNA       | NanoPARE        |
|-----------------|-----------------|
| <i>ccm</i>      | <i>ccm</i>      |
| <i>cpe-2015</i> | <i>cpe-2015</i> |
| <i>cpe-2017</i> |                 |
| <i>cgr-dp</i>   | <i>cgr-dp</i>   |
| <i>cgr-pm</i>   |                 |
| <i>cgr-mass</i> |                 |
| <i>cin</i>      | <i>cin</i>      |

### Protein\_kinase\_superfamily\_protein

AT1G21590 - CI\_cpe-2017\_503

**Secondary siRNAs**

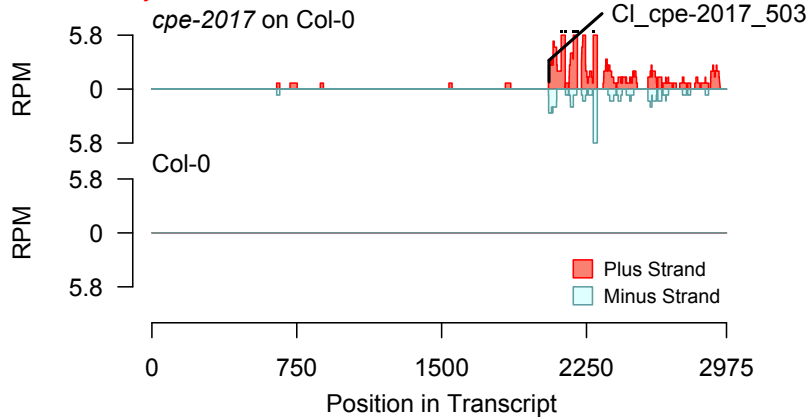

Degradome hits not found for sRNA

**2nd siRNAs: Phase diagram**

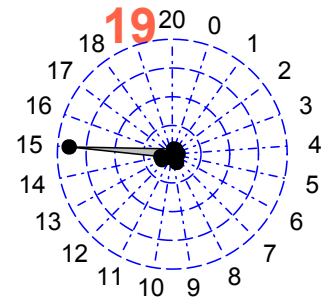

**2nd siRNAs: Size distribution**

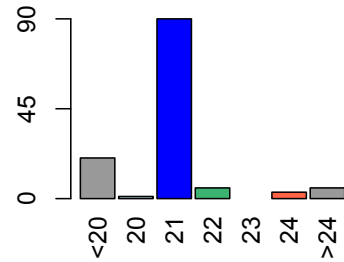



**Allenscore:** 2.5

**Target Interaction:**

5'- UAGGUUACAUGGCUCCAGAGUA AT1G53440.1  
|||:||||| |||||  
3'- AUCCGAUGUACGGAGGUCUCAU CI\_cgr-mass\_20246

**Target Site:** 2600

**Superfamily:** SupFam\_59

**miRNAin ccm:** N/A

**Published name:** N/A

**Confirmed Targeting**

2nd-siRNA NanoPARE

|                 |                 |
|-----------------|-----------------|
| <i>ccm</i>      | <i>ccm</i>      |
| <i>cpe-2015</i> | <i>cpe-2015</i> |
| <i>cpe-2017</i> |                 |
| <i>cgr-dp</i>   | <i>cgr-dp</i>   |
| <i>cgr-pm</i>   |                 |
| <i>cgr-mass</i> |                 |
| <i>cin</i>      | <i>cin</i>      |

**Leucine-rich\_repeat\_transmembrane\_protei**

AT1G53440 - CI\_cgr-mass\_20246

**Secondary siRNAs**

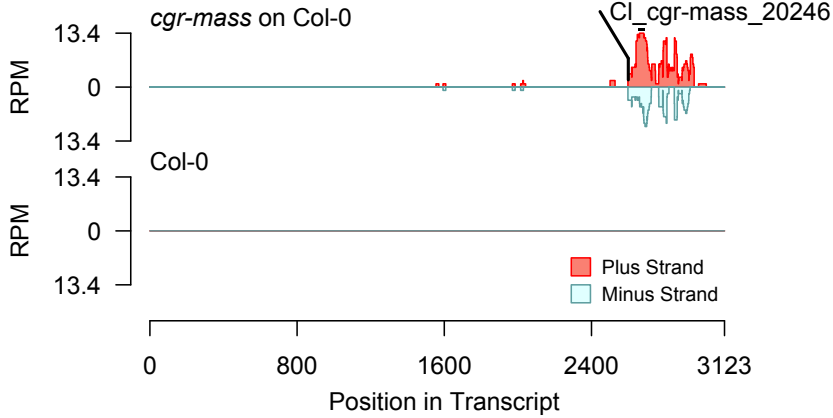

**2nd siRNAs: Phase diagram**

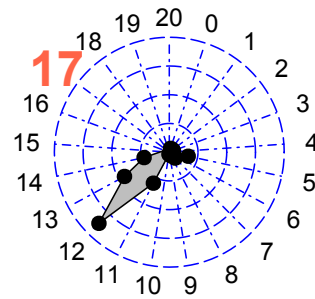

**2nd siRNAs: Size distribution**

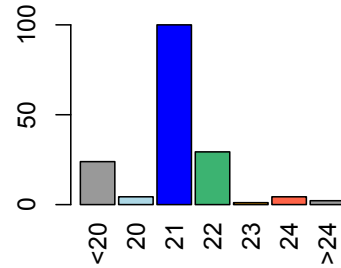

Degradome hits not found for sRNA

**Allenscore:** 4

**Target Interaction:**

5'- GAGAAUGGCUGGCAGAGGUGA AT5G56460.1  
      | | | | | | | | | | | | | | | | | : | | | |  
3'- GUCUUACCGUCCGUCUUCACU CI\_cgr-dp\_8691

**Target Site:** 820

**Superfamily:** SupFam\_4

**miRNAin ccm:** N/A

**Published name:** N/A

**Confirmed Targeting**

2nd-siRNA    NanoPARE

|          |          |
|----------|----------|
| ccm      | ccm      |
| cpe-2015 | cpe-2015 |
| cpe-2017 |          |
| cgr-dp   | cgr-dp   |
| cgr-pm   |          |
| cgr-mass |          |
| cin      | cin      |

**Protein\_kinase\_superfamily\_protein**

AT5G56460 - CI\_cgr-dp\_8691

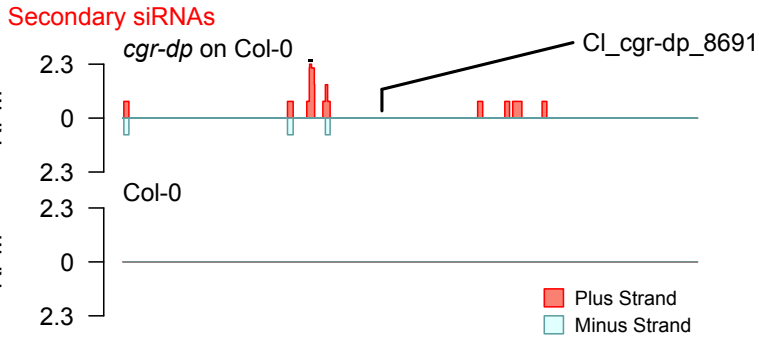

Diff. Exp. secondary siRNA locus not found

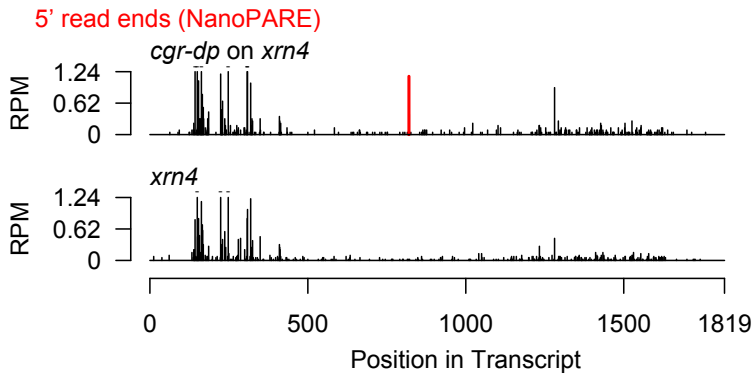

Allenscore: 5.5

Target Interaction:

5'- GAGAAUGGCUGGCAGAGGUGA AT5G56460.1  
          |||:| | | | | | | | | | | |  
3'- GUCUUACUGUCCAUCUCCACU CI\_cgr-dp\_67

Target Site: 820

Superfamily: SupFam\_4

miRNAin ccm: N/A

Published name: N/A

Confirmed Targeting

2nd-siRNA NanoPARE

|          |          |
|----------|----------|
| ccm      | ccm      |
| cpe-2015 | cpe-2015 |
| cpe-2017 |          |
| cgr-dp   | cgr-dp   |
| cgr-pm   |          |
| cgr-mass |          |
| cin      | cin      |

### Protein\_kinase\_superfamily\_protein

AT5G56460 - CI\_cgr-dp\_67

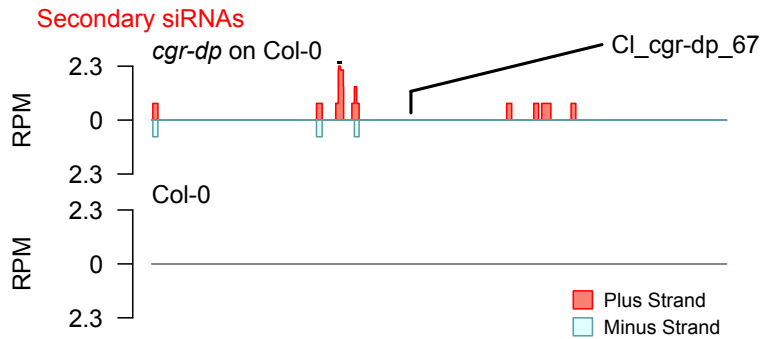

Diff. Exp. secondary siRNA locus not found

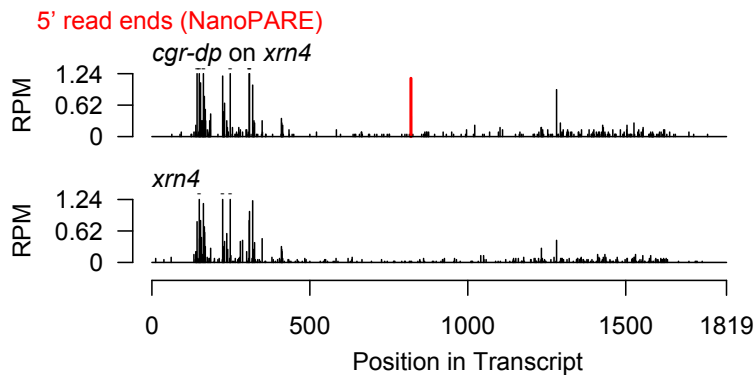

**Allenscore:** 5

**Target Interaction:**

5'- GAGAAUGGCUGGCAGAGGUGA AT5G56460.1  
 ||||| | | | | | | | | | | | | | | |  
 3'- AUCUUACCGUCCGGCUCCACU CI\_cgr-dp\_1335

**Target Site:** 820

**Superfamily:** SupFam\_4

**miRNA in ccm:** N/A

**Published name:** N/A

**Confirmed Targeting**

2nd-siRNA NanoPARE

|                 |                      |
|-----------------|----------------------|
| <i>ccm</i>      | <i>ccm</i>           |
| <i>cpe-2015</i> | <i>cpe-2015</i>      |
| <i>cpe-2017</i> |                      |
| <i>cgr-dp</i>   | <b><i>cgr-dp</i></b> |
| <i>cgr-pm</i>   |                      |
| <i>cgr-mass</i> |                      |
| <i>cin</i>      | <i>cin</i>           |

# Protein\_kinase\_superfamily\_protein

AT5G56460 - CI\_cgr-dp\_1335

## Secondary siRNAs

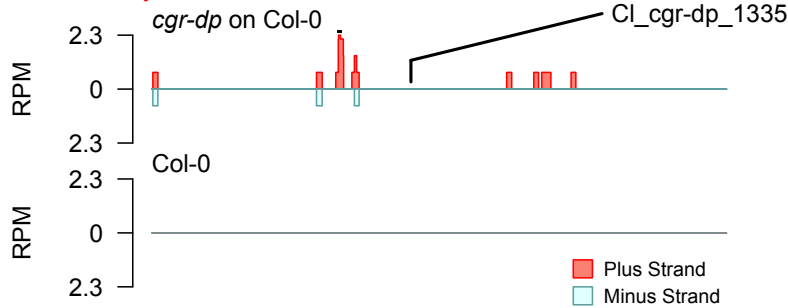

Diff. Exp. secondary siRNA locus not found

## 5' read ends (NanoPARE)

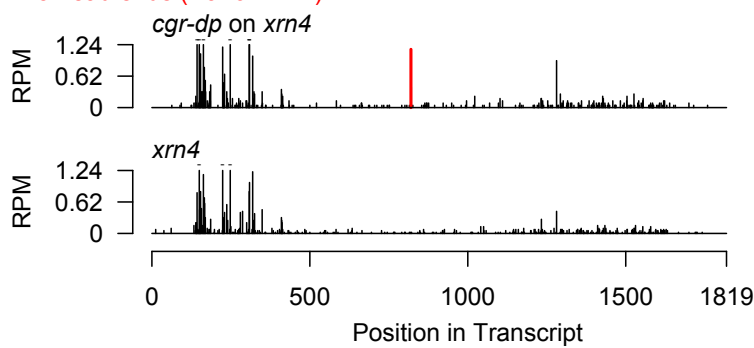

**Allenscore:** 3.5

**Target Interaction:**

```

5'- GGAGACUAGUACUAGGAGACAUAAUCA AT3G27925.1
  ||   |||||||:|||||||||||||
3'- CC - - GAUCAUGGUCCUCUGUAAUAGU CI_cgr-dp_83
  
```

**Target Site:** 1305

**Superfamily:** SupFam\_33

**miRNAin ccm:** N/A

**Published name:** N/A

**Confirmed Targeting**

2nd-siRNA NanoPARE

|                 |                 |
|-----------------|-----------------|
| <i>ccm</i>      | <i>ccm</i>      |
| <i>cpe-2015</i> | <i>cpe-2015</i> |
| <i>cpe-2017</i> |                 |
| <i>cgr-dp</i>   | <i>cgr-dp</i>   |
| <i>cgr-pm</i>   |                 |
| <i>cgr-mass</i> |                 |
| <i>cin</i>      | <i>cin</i>      |

**DEG1**

AT3G27925 - CI\_cgr-dp\_83

**Secondary siRNAs**

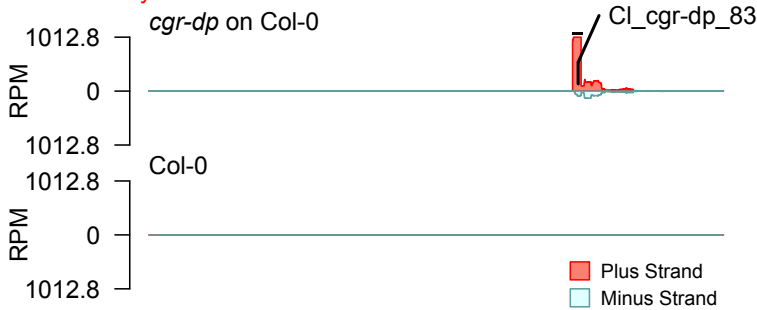

**5' read ends (NanoPARE)**

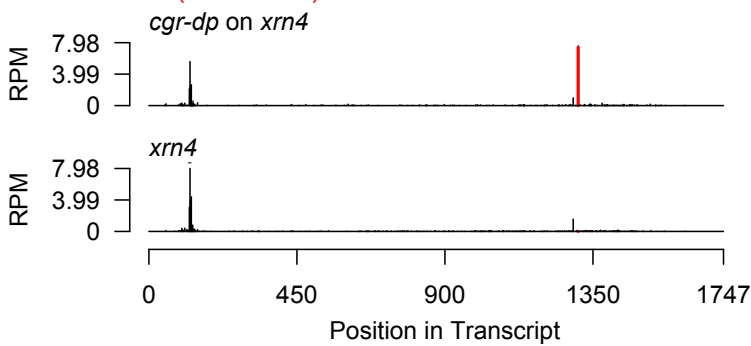

**2nd siRNAs: Phase diagram**

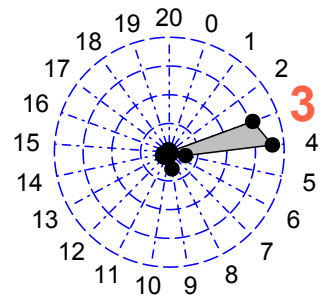

**2nd siRNAs: Size distribution**

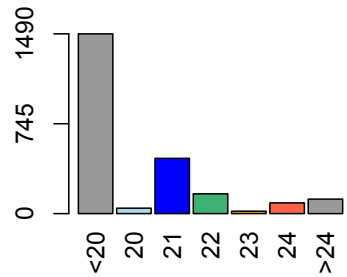

Allenscore: 0.5

**Target Interaction:**

5'- AGUACUAGGAGACAUAAUCA AT3G27925.1  
|||||:|||||  
3'- UCAUGGUCCUCUGUAUUAGU CI\_cgr-dp\_775

Target Site: 1305

Superfamily: SupFam\_33

miRNA in ccm: N/A

Published name: N/A

**Confirmed Targeting**

2nd-siRNA NanoPARE

|                 |                 |
|-----------------|-----------------|
| <i>ccm</i>      | <i>ccm</i>      |
| <i>cpe-2015</i> | <i>cpe-2015</i> |
| <i>cpe-2017</i> |                 |
| <i>cgr-dp</i>   | <i>cgr-dp</i>   |
| <i>cgr-pm</i>   |                 |
| <i>cgr-mass</i> |                 |
| <i>cin</i>      | <i>cin</i>      |

**DEG1**

AT3G27925 - CI\_cgr-dp\_775

**Secondary siRNAs**

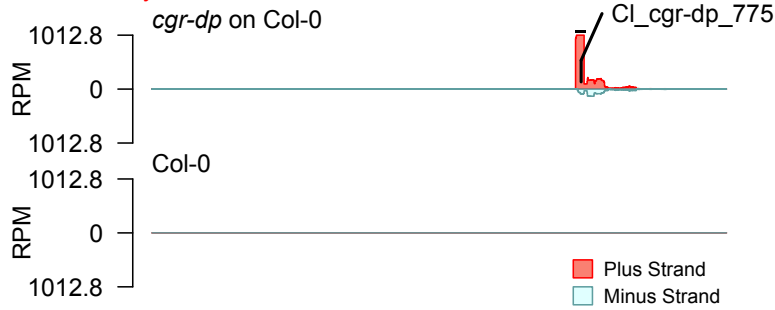

**5' read ends (NanoPARE)**

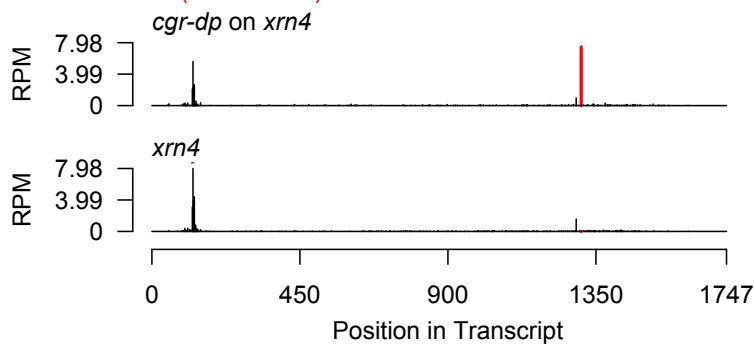

**2nd siRNAs: Phase diagram**

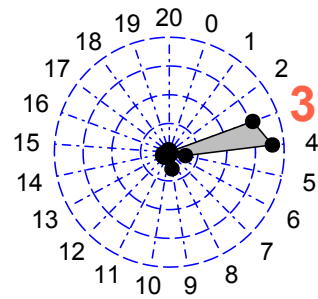

**2nd siRNAs: Size distribution**

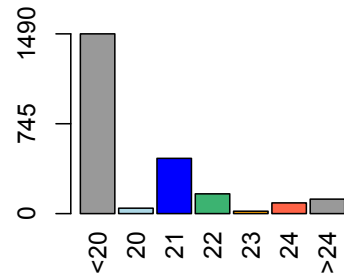

**Allenscore:** 3.5

**Target Interaction:**

```

5'- GGAGACUAGUACUAGGAGACAUAUAUCA  AT3G27925.1
   ||  ||| ||||| ||||| :||| ||||| ||||| |||
3'- CC- - - GAUCAUGGUCCUCUGUAUUAGU  CI_cgr-pm_154
  
```

**Target Site:** 1305

**Superfamily:** SupFam\_33

**miRNA in ccm:** N/A

**Published name:** N/A

**Confirmed Targeting**

2nd-siRNA NanoPARE

|          |          |
|----------|----------|
| ccm      | ccm      |
| cpe-2015 | cpe-2015 |
| cpe-2017 |          |
| cgr-dp   | cgr-dp   |
| cgr-pm   |          |
| cgr-mass |          |
| cin      | cin      |

**DEG1**

AT3G27925 - CI\_cgr-pm\_154

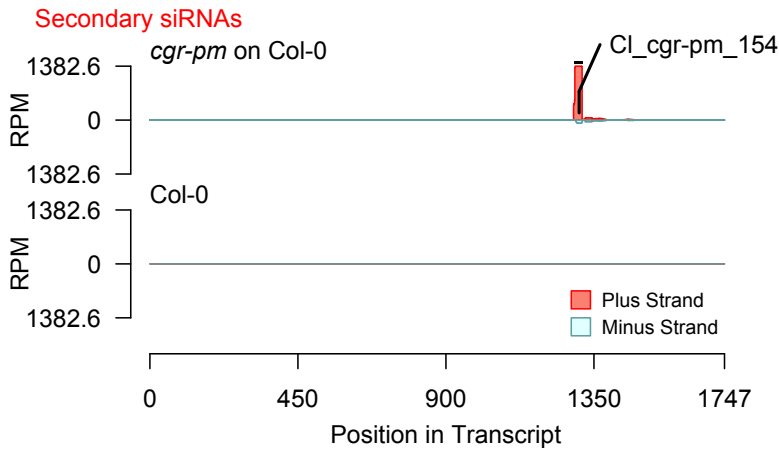

Degradome hits not found for sRNA

**2nd siRNAs: Phase diagram**

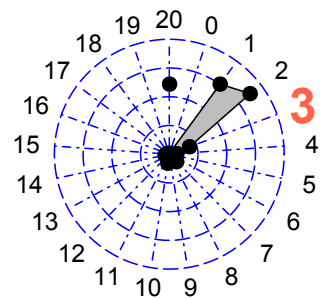

**2nd siRNAs: Size distribution**

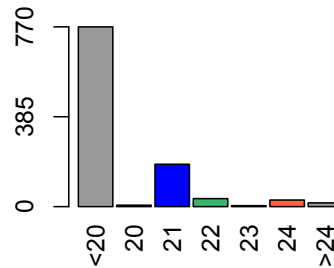

**Allenscore:** 1.5

**Target Interaction:**

5'- CUAGUACUAGGAGACAUAUAUCA AT3G27925.1  
|||||:|||||  
3'- AAUCAUGGUCCUCUGUAUUAGU CI\_cgr-pm\_456

**Target Site:** 1305

**Superfamily:** SupFam\_33

**miRNAin ccm:** N/A

**Published name:** N/A

**Confirmed Targeting**

*2nd-siRNA* *NanoPARE*

|                 |                 |
|-----------------|-----------------|
| <i>ccm</i>      | <i>ccm</i>      |
| <i>cpe-2015</i> | <i>cpe-2015</i> |
| <i>cpe-2017</i> |                 |
| <i>cgr-dp</i>   | <i>cgr-dp</i>   |
| <i>cgr-pm</i>   |                 |
| <i>cgr-mass</i> |                 |
| <i>cin</i>      | <i>cin</i>      |

## DEG1

AT3G27925 - CI\_cgr-pm\_456

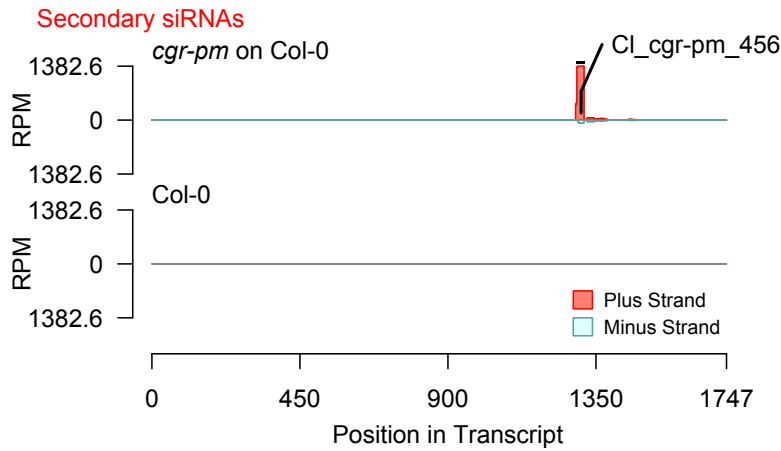

Degradome hits not found for sRNA

**2nd siRNAs: Phase diagram**

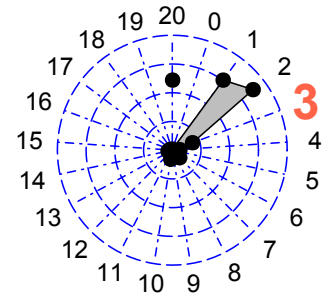

**2nd siRNAs: Size distribution**

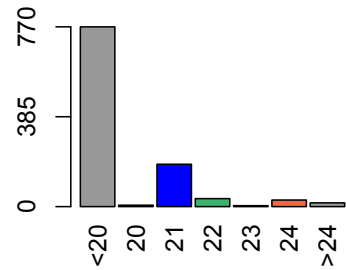









**Allenscore:** 4.5

**Target Interaction:**

5'- UGUGGUUACAUUGCACCAGAAUA AT4G28490.1  
  : : ||||| : ||||| |||||  
3'- GUCCCAAUGCGACGUGGUCUUAU CI\_ccm\_818

**Target Site:** 2815

**Superfamily:** SupFam\_124

**miRNAin ccm:** No

**Published name:** Not published

**Confirmed Targeting**

2nd-siRNA NanoPARE

|                 |                 |
|-----------------|-----------------|
| <i>ccm</i>      | <i>ccm</i>      |
| <i>cpe-2015</i> | <i>cpe-2015</i> |
| <i>cpe-2017</i> |                 |
| <i>cgr-dp</i>   | <i>cgr-dp</i>   |
| <i>cgr-pm</i>   |                 |
| <i>cgr-mass</i> |                 |
| <i>cin</i>      | <i>cin</i>      |

## HAE

AT4G28490 - CI\_ccm\_818

### Secondary siRNAs

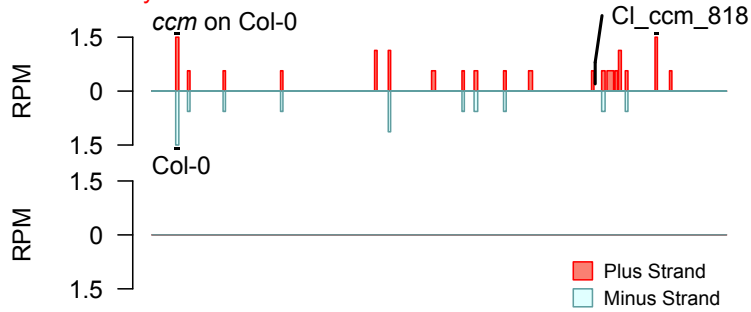

Diff. Exp. secondary siRNA locus not found

### 5' read ends (NanoPARE)

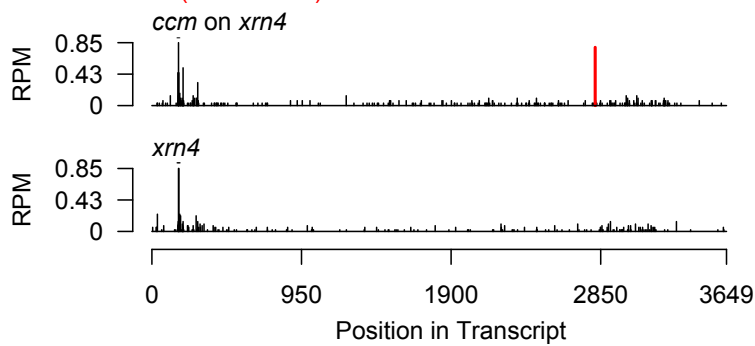

**Allenscore:** 5

**Target Interaction:**

5'- UAAACGCCAAGAGGAACUCC AT5G46580.1  
          |||||          |||:|||||  
3'- UUUUGCGGUGCUCUUUGAAGU CI\_cgr-dp\_29

**Target Site:** 1929

**Superfamily:** SupFam\_26

**miRNAin ccm:** Yes

**Published name:** N/A

**Confirmed Targeting**

2nd-siRNA    NanoPARE

|                 |                 |
|-----------------|-----------------|
| <i>ccm</i>      | <i>ccm</i>      |
| <i>cpe-2015</i> | <i>cpe-2015</i> |
| <i>cpe-2017</i> |                 |
| <i>cgr-dp</i>   | <i>cgr-dp</i>   |
| <i>cgr-pm</i>   |                 |
| <i>cgr-mass</i> |                 |
| <i>cin</i>      | <i>cin</i>      |

**PPR\_repeat-containing\_protein**

AT5G46580 - CI\_cgr-dp\_29

**Secondary siRNAs**

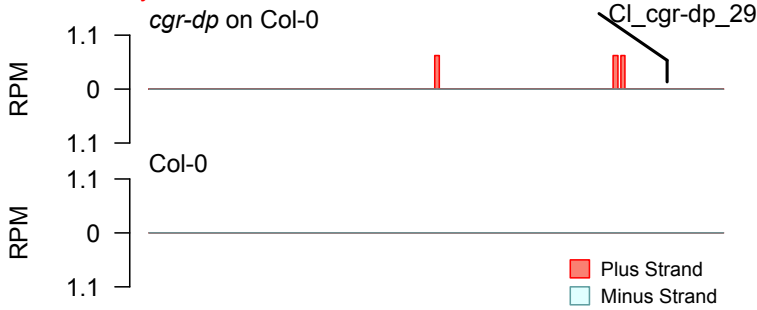

Diff. Exp. secondary siRNA locus not found

**5' read ends (NanoPARE)**

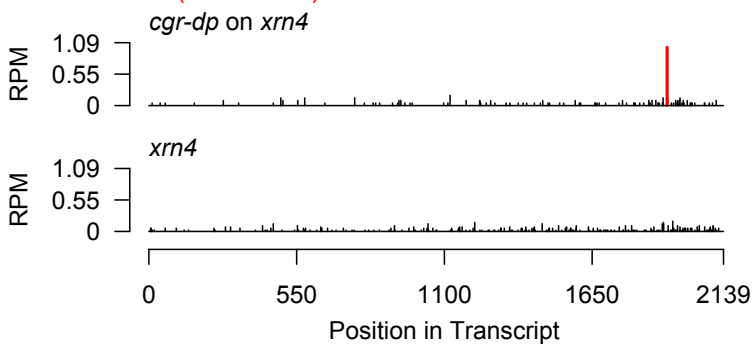









**Allenscore:** 0.5

**Target Interaction:**

5'- GAUUGCUGUUAAGAAACUGAA AT2G17220.1  
: |||||  
3'- UUAACGACAAUUCUUUGACUU CI\_ccm\_9385

**Target Site:** 799

**Superfamily:** SupFam\_320

**miRNAin ccm:** Yes

**Published name:** Not published

**Confirmed Targeting**

2nd-siRNA NanoPARE

|                 |                 |
|-----------------|-----------------|
| <i>ccm</i>      | <i>ccm</i>      |
| <i>cpe-2015</i> | <i>cpe-2015</i> |
| <i>cpe-2017</i> |                 |
| <i>cgr-dp</i>   | <i>cgr-dp</i>   |
| <i>cgr-pm</i>   |                 |
| <i>cgr-mass</i> |                 |
| <i>cin</i>      | <i>cin</i>      |

### Kin3

AT2G17220 - CI\_ccm\_9385

**Secondary siRNAs**

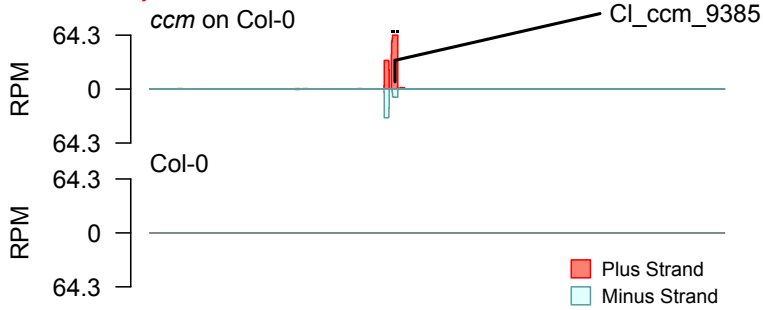

Diff. Exp. secondary siRNA locus not found

**5' read ends (NanoPARE)**

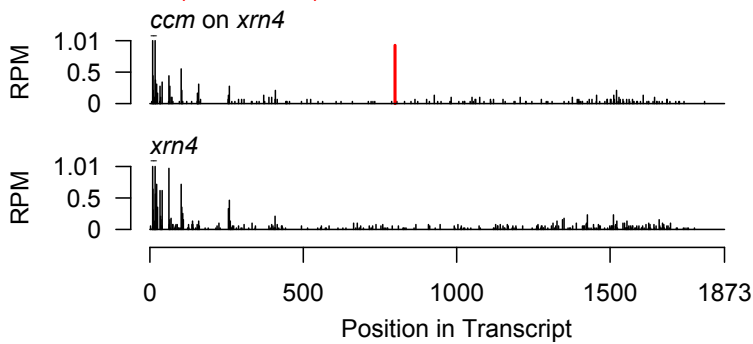

**Allenscore:** 2

**Target Interaction:**

```

5'- UCGGGAUGCUGAAGAUGCUA AT1G02840.1
   |||
3'- CUCCCUACGACUUCUACGAU CI_cin_3533
  
```

**Target Site:** 370

**Superfamily:** SupFam\_742

**miRNAin ccm:** N/A

**Published name:** N/A

**Confirmed Targeting**

| 2nd-siRNA       | NanoPARE        |
|-----------------|-----------------|
| <i>ccm</i>      | <i>ccm</i>      |
| <i>cpe-2015</i> | <i>cpe-2015</i> |
| <i>cpe-2017</i> |                 |
| <i>cgr-dp</i>   | <i>cgr-dp</i>   |
| <i>cgr-pm</i>   |                 |
| <i>cgr-mass</i> |                 |
| <i>cin</i>      | <i>cin</i>      |

**SR34**

AT1G02840 - CI\_cin\_3533

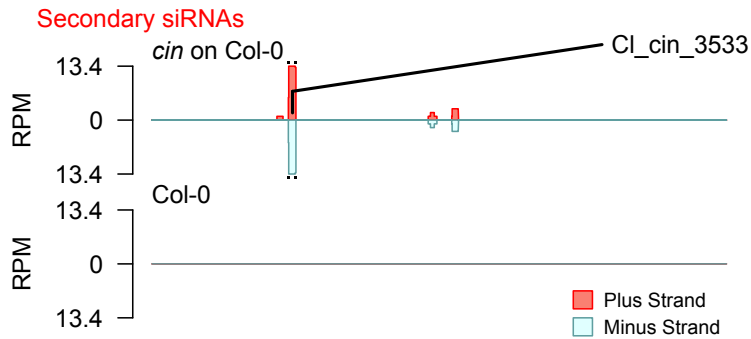

Diff. Exp. secondary siRNA locus not found

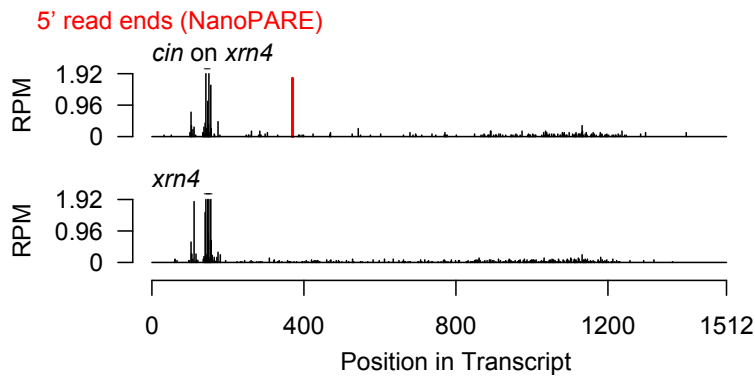

**Allenscore:** 3

**Target Interaction:**

5'- AGGAAGAUUGUGCAAAGAGAU A T4G01650.1  
|||||:| |  
3'- UCCUUCUAACAUGUGUCUCUAU CI\_ccm\_6791

**Target Site:** 1000

**Superfamily:** SupFam\_134

**miRNAin ccm:** Yes

**Published name:** Not published

**Confirmed Targeting**

2nd-siRNA NanoPARE

|                 |                 |
|-----------------|-----------------|
| <i>ccm</i>      | <i>ccm</i>      |
| <i>cpe-2015</i> | <i>cpe-2015</i> |
| <i>cpe-2017</i> |                 |
| <i>cgr-dp</i>   | <i>cgr-dp</i>   |
| <i>cgr-pm</i>   |                 |
| <i>cgr-mass</i> |                 |
| <i>cin</i>      | <i>cin</i>      |

**Polyketide\_cyclase\_dehydrase\_and\_lipid\_t**

AT4G01650 - CI\_ccm\_6791

**Secondary siRNAs**

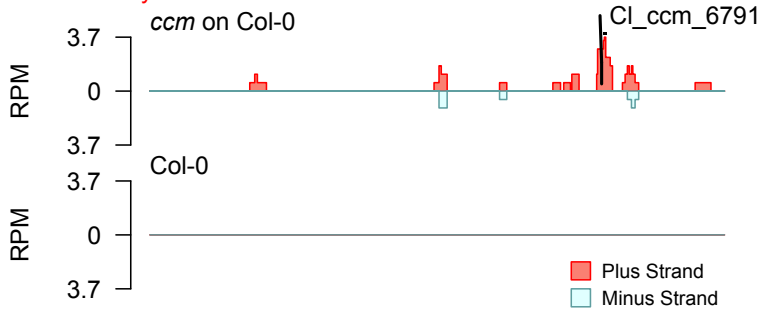

Diff. Exp. secondary siRNA locus not found

**5' read ends (NanoPARE)**

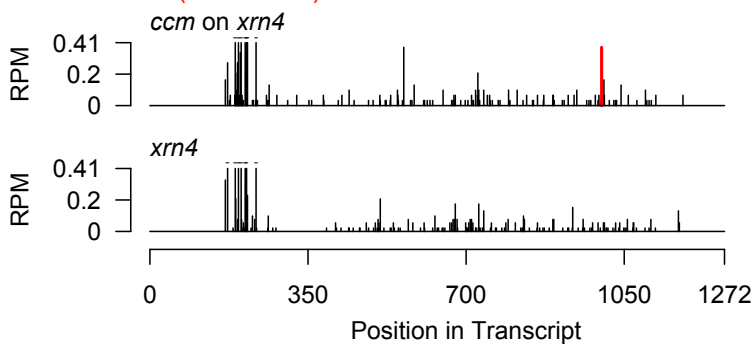

**Allenscore:** 3

**Target Interaction:**

5'- UGGACUUGUGAUGGAGGAGAUAA AT3G46740.1  
 | : | | | | | | : | | | | | : | | | | | |  
 3'- AUC-GAACAUUACCUUCUCUAAU CI\_cin\_10092

**Target Site:** 1871

**Superfamily:** SupFam\_1423

**miRNAin ccm:** N/A

**Published name:** N/A

**Confirmed Targeting**

*2nd-siRNA*     *NanoPARE*

|                 |                 |
|-----------------|-----------------|
| <i>ccm</i>      | <i>ccm</i>      |
| <i>cpe-2015</i> | <i>cpe-2015</i> |
| <i>cpe-2017</i> |                 |
| <i>cgr-dp</i>   | <i>cgr-dp</i>   |
| <i>cgr-pm</i>   |                 |
| <i>cgr-mass</i> |                 |
| <i>cin</i>      | <i>cin</i>      |

### TOC75-III

AT3G46740 - CI\_cin\_10092

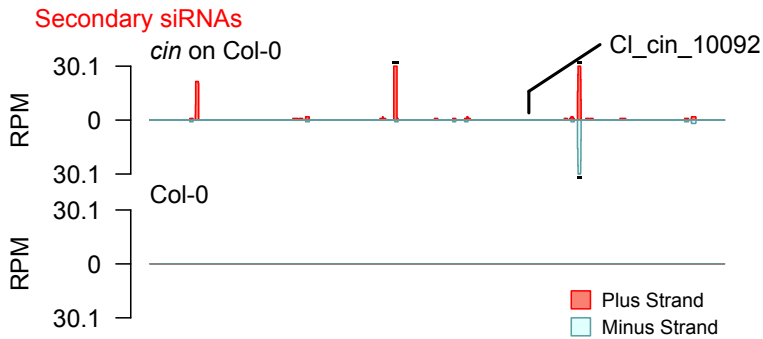

Diff. Exp. secondary siRNA  
locus not found

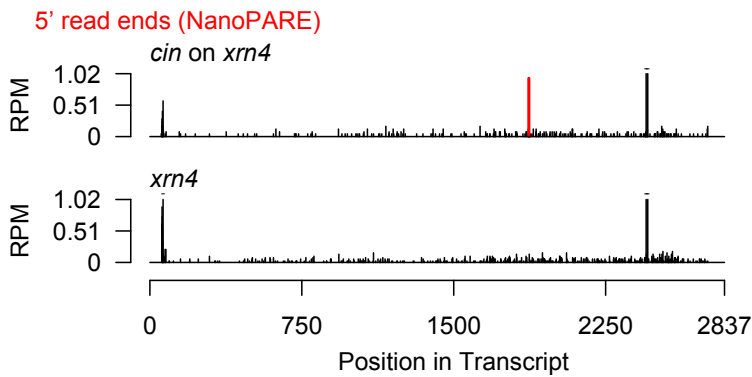

Allescore: 5

**Target Interaction:**

5'- AAGAAUGACAGGAGGAGGUGC AT5G24760.1  
| | | | | | | | | | | | | | : | | | | |  
3'- GUCUUACUGUCCAUCUCCACU CI\_cgr-dp\_67

Target Site: 1124

Superfamily: SupFam\_4

miRNAin ccm: N/A

Published name: N/A

**Confirmed Targeting**

2nd-siRNA NanoPARE

|                 |                 |
|-----------------|-----------------|
| <i>ccm</i>      | <i>ccm</i>      |
| <i>cpe-2015</i> | <i>cpe-2015</i> |
| <i>cpe-2017</i> |                 |
| <i>cgr-dp</i>   | <i>cgr-dp</i>   |
| <i>cgr-pm</i>   |                 |
| <i>cgr-mass</i> |                 |
| <i>cin</i>      | <i>cin</i>      |

**GroES-like\_zinc-binding\_dehydrogenase\_fa**

AT5G24760 - CI\_cgr-dp\_67

Secondary siRNAs

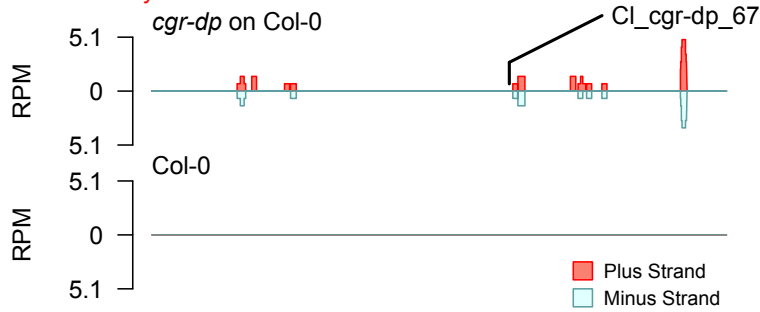

Diff. Exp. secondary siRNA locus not found

5' read ends (NanoPARE)

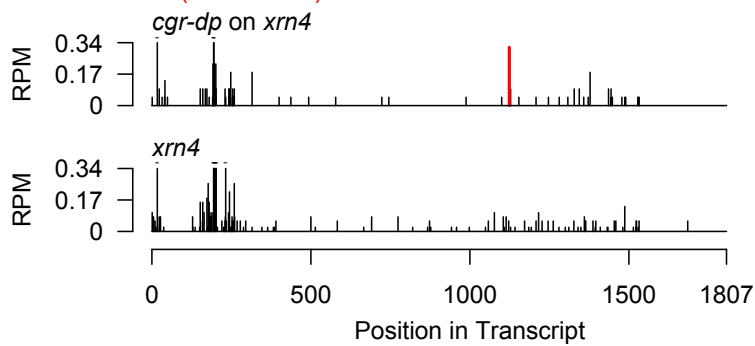

**Allenscore:** 3.5

**Target Interaction:**

```
5'- CUGGUCUGCAAUAUCAUGGCACA AT1G12820.1
      ||| |::| |::| |::| |::| |::| |::| |
3'- GAGCAGAUGUUUAGUACCAUGU CI_ccm_2
```

**Target Site:** 472

**Superfamily:** SupFam\_27

**miRNAin ccm:** Yes

**Published name:** ccm-MIR12497a\*

**Confirmed Targeting**

2nd-siRNA NanoPARE

|                 |                 |
|-----------------|-----------------|
| <i>ccm</i>      | <i>ccm</i>      |
| <i>cpe-2015</i> | <i>cpe-2015</i> |
| <i>cpe-2017</i> |                 |
| <i>cgr-dp</i>   | <i>cgr-dp</i>   |
| <i>cgr-pm</i>   |                 |
| <i>cgr-mass</i> |                 |
| <i>cin</i>      | <i>cin</i>      |

### AFB3

AT1G12820 - CI\_ccm\_2

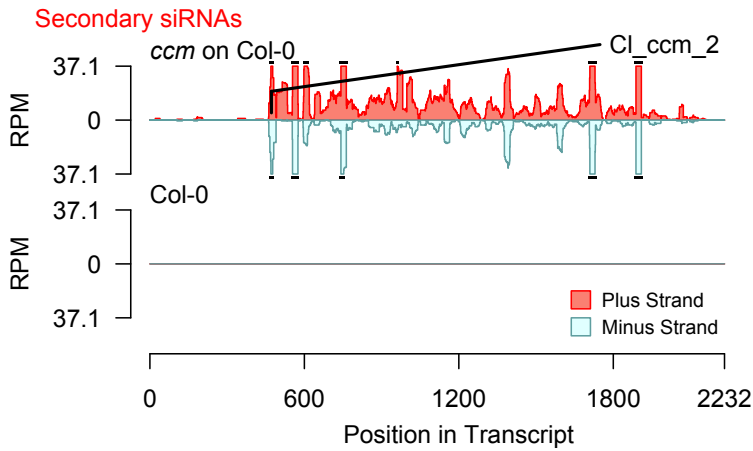

Degradome hits not found for sRNA

**2nd siRNAs: Phase diagram**

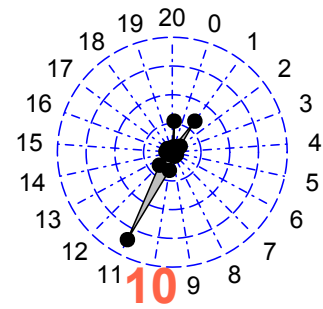

**2nd siRNAs: Size distribution**

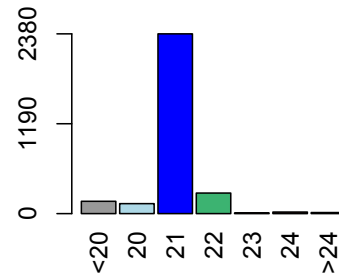

**Allenscore:** 4

**Target Interaction:**

5'- UCUGGUCUGCAAUUAUGGC AT1G12820.1  
 |||:|||||  
 3'- UGAGCAGAUGUUUAGUACCA CI\_ccm\_98

**Target Site:** 469

**Superfamily:** SupFam\_27

**miRNA in ccm:** Yes

**Published name:** Not published

**Confirmed Targeting**

2nd-siRNA NanoPARE

|                 |          |
|-----------------|----------|
| <b>ccm</b>      | ccm      |
| <b>cpe-2015</b> | cpe-2015 |
| <b>cpe-2017</b> |          |
| cgr-dp          | cgr-dp   |
| cgr-pm          |          |
| cgr-mass        |          |
| cin             | cin      |

**AFB3**

AT1G12820 - CI\_ccm\_98

**Secondary siRNAs**

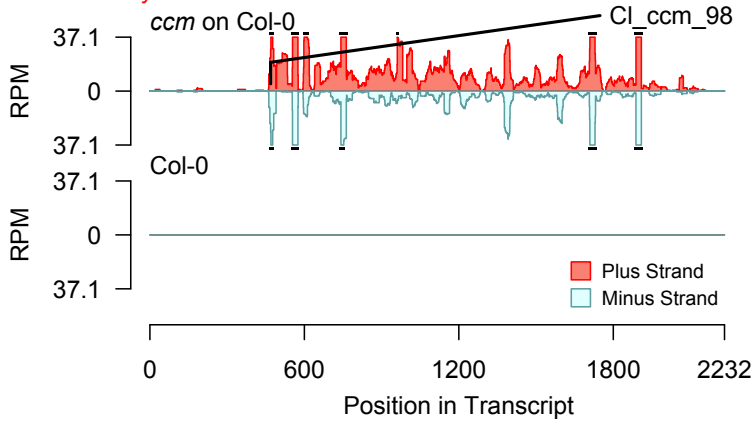

Degradome hits not found for sRNA

**2nd siRNAs: Phase diagram**

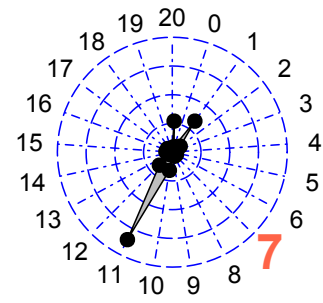

**2nd siRNAs: Size distribution**

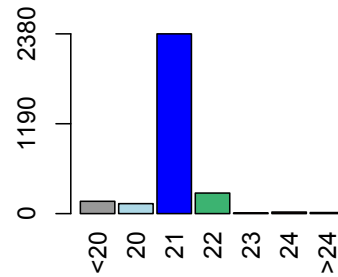

**Allenscore:** 4

**Target Interaction:**

5'- CUGGUCUGCAAUCAUGGCACA AT1G12820.1  
 ||||| ||||| ||||| ||||| ||||| ||||| |||||  
 3'- AACCAUACGUUUAGUACCAUGU CI\_ccm\_614

**Target Site:** 472

**Superfamily:** SupFam\_27

**miRNAin ccm:** Yes

**Published name:** ccm-MIR12497b

**Confirmed Targeting**

2nd-siRNA NanoPARE

|                 |          |
|-----------------|----------|
| <b>ccm</b>      | ccm      |
| <b>cpe-2015</b> | cpe-2015 |
| <b>cpe-2017</b> |          |
| cgr-dp          | cgr-dp   |
| cgr-pm          |          |
| cgr-mass        |          |
| cin             | cin      |

**AFB3**

AT1G12820 - CI\_ccm\_614

**Secondary siRNAs**

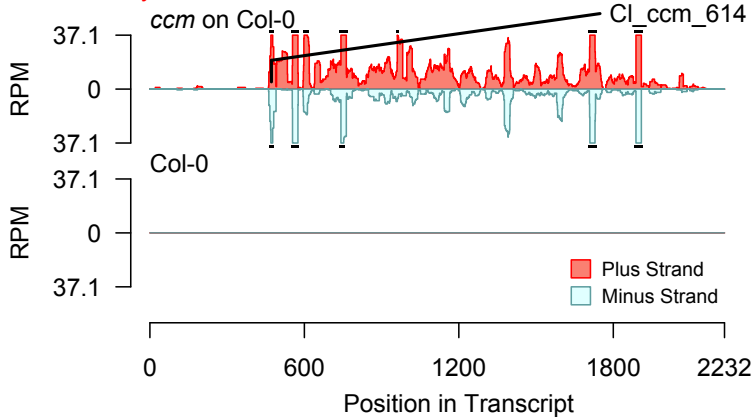

Degradome hits not found for sRNA

**2nd siRNAs: Phase diagram**

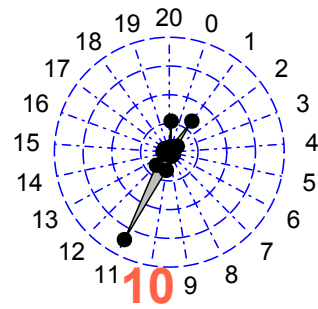

**2nd siRNAs: Size distribution**

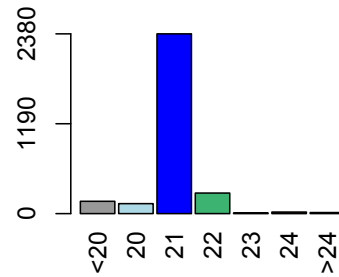



**Allenscore:** 5

**Target Interaction:**

5'- CAGAUCCUGAAU - CUUUUGCA AT1G12820.1  
          | | | | | | | | | | | | | | | | : | |  
3'- AUCUAGGUCUUACGAAAUGU CI\_ccm\_2562

**Target Site:** 1123

**Superfamily:** SupFam\_196

**miRNAin ccm:** Yes

**Published name:** Not published

**Confirmed Targeting**

2nd-siRNA NanoPARE

|                 |                 |
|-----------------|-----------------|
| <i>ccm</i>      | <i>ccm</i>      |
| <i>cpe-2015</i> | <i>cpe-2015</i> |
| <i>cpe-2017</i> |                 |
| <i>cgr-dp</i>   | <i>cgr-dp</i>   |
| <i>cgr-pm</i>   |                 |
| <i>cgr-mass</i> |                 |
| <i>cin</i>      | <i>cin</i>      |

**AFB3**

AT1G12820 - CI\_ccm\_2562

**Secondary siRNAs**

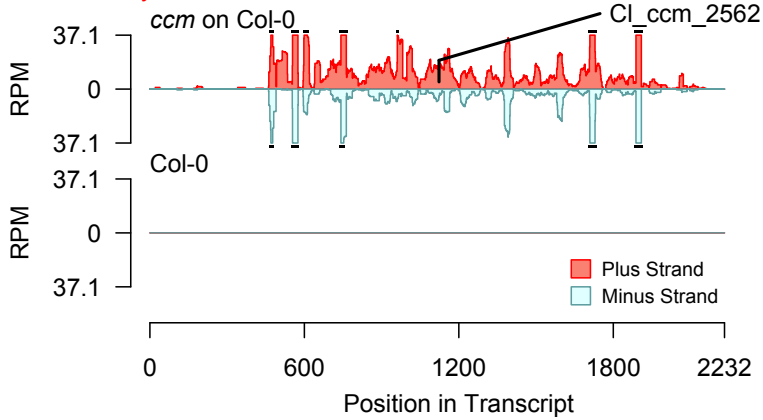

Degradome hits not found for sRNA

**2nd siRNAs: Phase diagram**

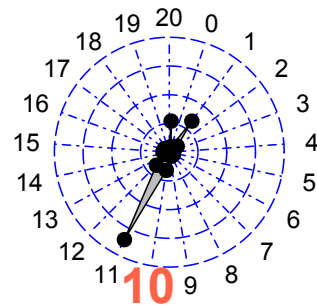

**2nd siRNAs: Size distribution**

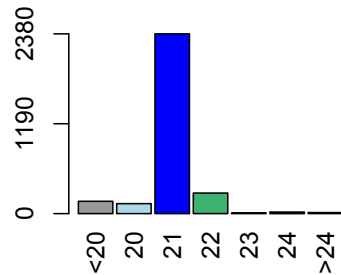

Allenscore: 3

**Target Interaction:**

5'- CUGGUCUGCAAUCAUGGCACA AT1G12820.1  
|| | | | | | | | | | | | | | | | | |  
3'- GAGCAGACGUUUAGUACCAUGU CI\_cpe-2015\_7

**Target Site:** 472

**Superfamily:** SupFam\_27

**miRNAin ccm:** Yes

**Published name:** N/A

**Confirmed Targeting**

2nd-siRNA NanoPARE

|                 |                 |
|-----------------|-----------------|
| <b>ccm</b>      | <b>ccm</b>      |
| <b>cpe-2015</b> | <b>cpe-2015</b> |
| <b>cpe-2017</b> |                 |
| <b>cgr-dp</b>   | <b>cgr-dp</b>   |
| <b>cgr-pm</b>   |                 |
| <b>cgr-mass</b> |                 |
| <b>cin</b>      | <b>cin</b>      |

**AFB3**

AT1G12820 - CI\_cpe-2015\_7

**Secondary siRNAs**

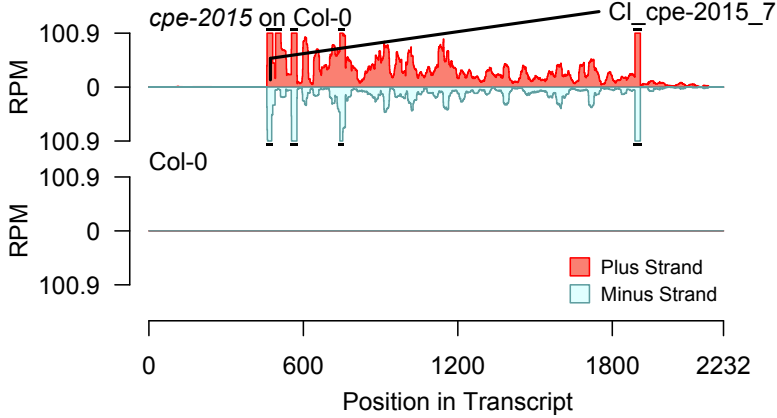

Degradome hits not found for sRNA

**2nd siRNAs: Phase diagram**

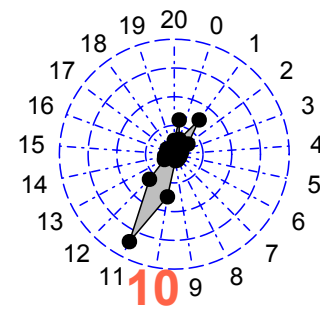

**2nd siRNAs: Size distribution**

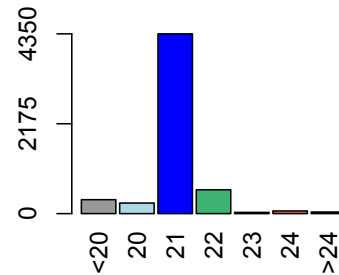

Alenscore: 3

Target Interaction:

```
5'- CUGGUCUGCAAUAUGGCACA AT1G12820.1
   ||| ||||| ||||| ||||| |||||
3'- GAGCAGACGUUUAGUACCAUGU CI_cpe-2017_11
```

Target Site: 472

Superfamily: SupFam\_27

miRNAin ccm: Yes

Published name: N/A

Confirmed Targeting

2nd-siRNA NanoPARE

|                 |                 |
|-----------------|-----------------|
| <i>ccm</i>      | <i>ccm</i>      |
| <i>cpe-2015</i> | <i>cpe-2015</i> |
| <i>cpe-2017</i> |                 |
| <i>cgr-dp</i>   | <i>cgr-dp</i>   |
| <i>cgr-pm</i>   |                 |
| <i>cgr-mass</i> |                 |
| <i>cin</i>      | <i>cin</i>      |

AFB3

AT1G12820 - CI\_cpe-2017\_11

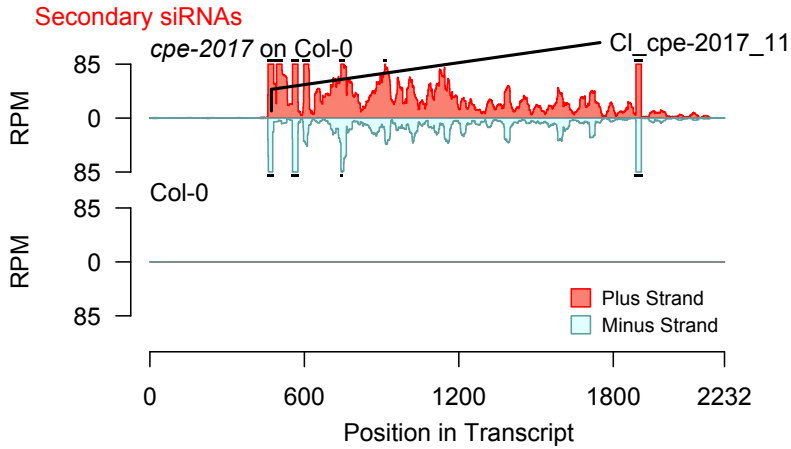

2nd siRNAs: Phase diagram

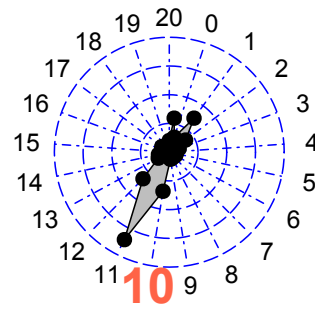

2nd siRNAs: Size distribution

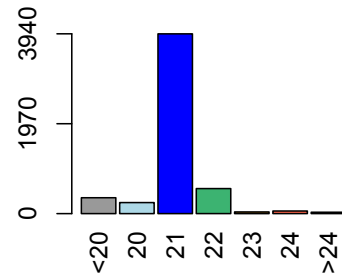

Degradome hits not found for sRNA

**Allenscore:** 5.5

**Target Interaction:**

5'- UUCCUGUACGGAGGAGAUGACU AT3G01680.1  
| | | | : | | | | | | | | | | | | | |  
3'- AUGGAUAUGCCUCCUCUCCUGU CI\_ccm\_535

**Target Site:** 1753

**Superfamily:** SupFam\_5

**miRNAin ccm:** Yes

**Published name:** ccm-MIR12480

**Confirmed Targeting**

2nd-siRNA NanoPARE

|                 |                 |
|-----------------|-----------------|
| <i>ccm</i>      | <i>ccm</i>      |
| <i>cpe-2015</i> | <i>cpe-2015</i> |
| <i>cpe-2017</i> |                 |
| <i>cgr-dp</i>   | <i>cgr-dp</i>   |
| <i>cgr-pm</i>   |                 |
| <i>cgr-mass</i> |                 |
| <i>cin</i>      | <i>cin</i>      |

**SEOR1**

AT3G01680 - CI\_ccm\_535

**Secondary siRNAs**

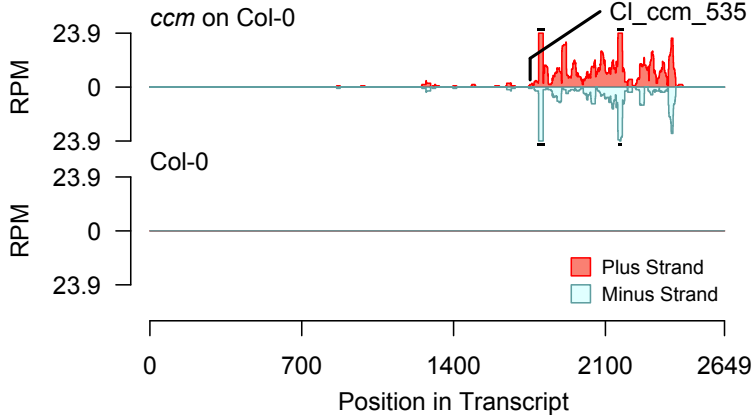

Degradome hits not found for sRNA

**2nd siRNAs: Phase diagram**

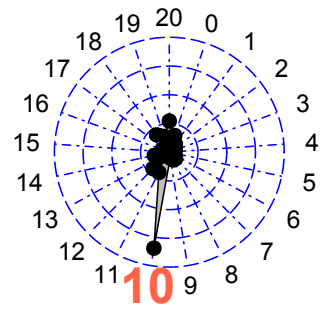

**2nd siRNAs: Size distribution**

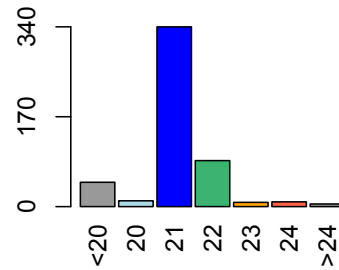

**Allenscore:** 5.5

**Target Interaction:**

5'- UUCCUGUACGGAGGAGAUGACU AT3G01680.1  
 | | : | | | | | | | | | | | | | |  
 3'- ACAGAU AUGCCUCCUCUCCUGA CI\_ccm\_6321

**Target Site:** 1753

**Superfamily:** SupFam\_5

**miRNAin ccm:** Yes

**Published name:** Not published

**Confirmed Targeting**

*2nd-siRNA* *NanoPARE*

|          |          |
|----------|----------|
| ccm      | ccm      |
| cpe-2015 | cpe-2015 |
| cpe-2017 |          |
| cgr-dp   | cgr-dp   |
| cgr-pm   |          |
| cgr-mass |          |
| cin      | cin      |

**SEOR1**

AT3G01680 - CI\_ccm\_6321

**Secondary siRNAs**

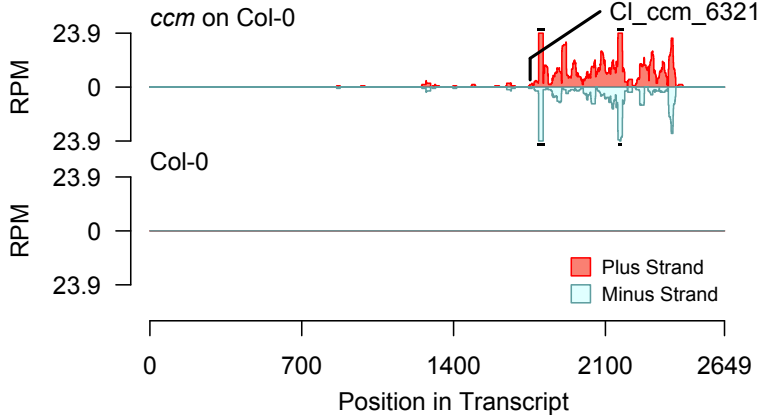

Degradome hits not found for sRNA

**2nd siRNAs: Phase diagram**

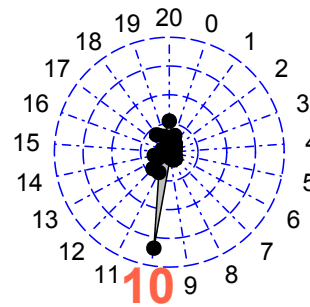

**2nd siRNAs: Size distribution**

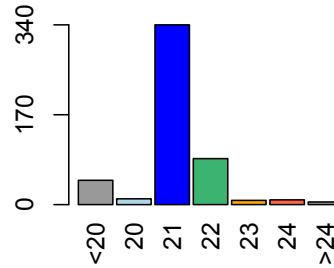

**Allenscore:** 6

**Target Interaction:**

5'- GGCCACUUUGAUUUCCACAUC AT3G01680.1  
: ||| ||| : : ||| : ||| |||  
3'- GUGGUGAAGUUAGAGUUGUAG CI\_ccm\_315

**Target Site:** 2250

**Superfamily:** SupFam\_19

**miRNAin ccm:** Yes

**Published name:** ccm-MIR12464

**Confirmed Targeting**

2nd-siRNA NanoPARE

|                 |                 |
|-----------------|-----------------|
| <i>ccm</i>      | <i>ccm</i>      |
| <i>cpe-2015</i> | <i>cpe-2015</i> |
| <i>cpe-2017</i> |                 |
| <i>cgr-dp</i>   | <i>cgr-dp</i>   |
| <i>cgr-pm</i>   |                 |
| <i>cgr-mass</i> |                 |
| <i>cin</i>      | <i>cin</i>      |

**SEOR1**

AT3G01680 - CI\_ccm\_315

**Secondary siRNAs**

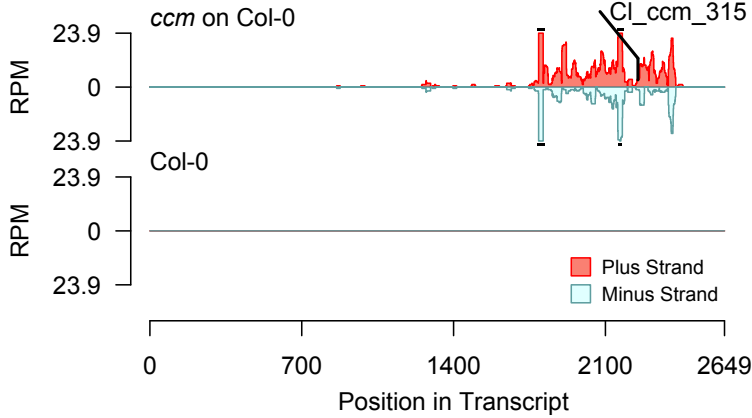

**2nd siRNAs: Phase diagram**

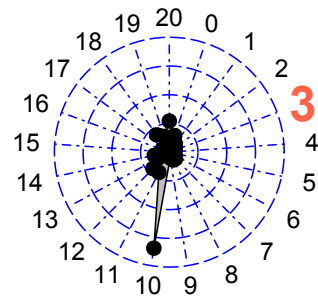

**2nd siRNAs: Size distribution**

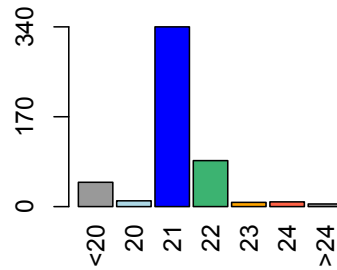

Degradome hits not found for sRNA



**Allenscore:** 5.5

**Target Interaction:**

5'- UUCCUGUACGGAGGAGAUGACU AT3G01680.1  
| : | | | : | | | | | | | | | | | | | | |  
3'- AUGGAUUAUACCUCCUCUUCUGA CI\_cgr-mass\_5049

**Target Site:** 1753

**Superfamily:** SupFam\_5

**miRNAin ccm:** Yes

**Published name:** N/A

**Confirmed Targeting**

2nd-siRNA NanoPARE

|                 |                 |
|-----------------|-----------------|
| <i>ccm</i>      | <i>ccm</i>      |
| <i>cpe-2015</i> | <i>cpe-2015</i> |
| <i>cpe-2017</i> |                 |
| <i>cgr-dp</i>   | <i>cgr-dp</i>   |
| <i>cgr-pm</i>   |                 |
| <i>cgr-mass</i> |                 |
| <i>cin</i>      | <i>cin</i>      |

**SEOR1**

AT3G01680 - CI\_cgr-mass\_5049

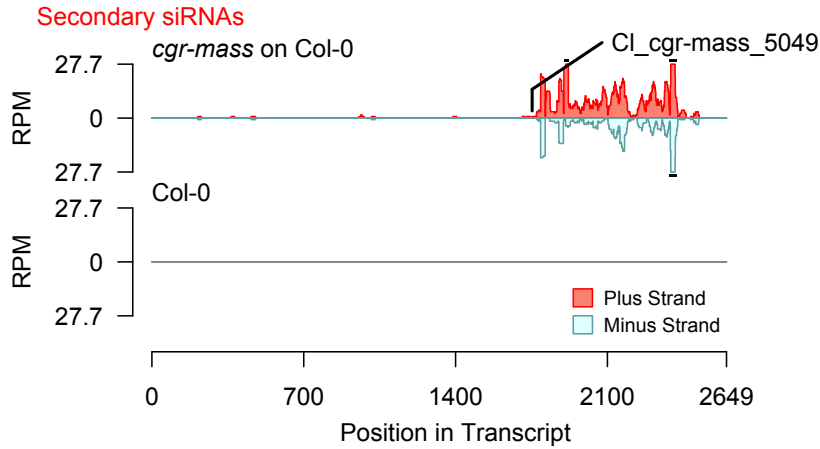

Degradome hits not found for sRNA

**2nd siRNAs: Phase diagram**

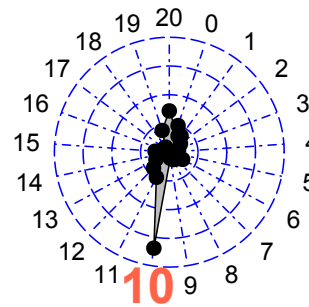

**2nd siRNAs: Size distribution**

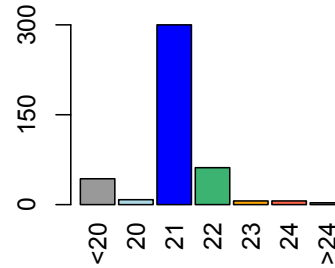



**Allenscore:** 3.5

**Target Interaction:**

5'- UUCCUGUACGGAGGAGAUGACU AT3G01680.1  
|:|||||  
3'- AGGACAUGCCUCCUCUUCUGU CI\_cpe-2015\_74

**Target Site:** 1753

**Superfamily:** SupFam\_5

**miRNAin ccm:** Yes

**Published name:** N/A

**Confirmed Targeting**

*2nd-siRNA*    *NanoPARE*

|                 |                 |
|-----------------|-----------------|
| <i>ccm</i>      | <i>ccm</i>      |
| <i>cpe-2015</i> | <i>cpe-2015</i> |
| <i>cpe-2017</i> |                 |
| <i>cgr-dp</i>   | <i>cgr-dp</i>   |
| <i>cgr-pm</i>   |                 |
| <i>cgr-mass</i> |                 |
| <i>cin</i>      | <i>cin</i>      |

### SEOR1

AT3G01680 - CI\_cpe-2015\_74

**2nd siRNAs: Phase diagram**

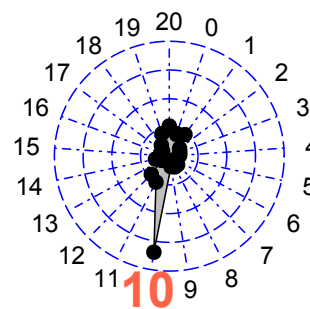

**2nd siRNAs: Size distribution**

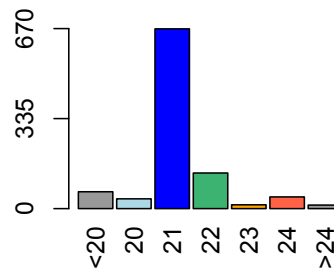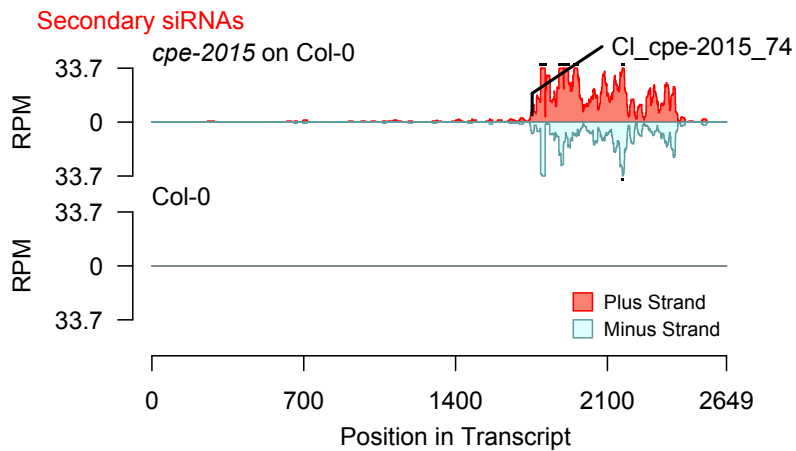

Degradome hits not found for sRNA

**Allenscore:** 5.5

**Target Interaction:**

5'- UUCCUGUACGGAGGAGAUGACU AT3G01680.1  
| |:||||:|||||||||||||||||  
3'- AUGGAUAUGCCUCCUCUCCUGU CI\_cpe-2015\_154

**Target Site:** 1753

**Superfamily:** SupFam\_5

**miRNAin ccm:** Yes

**Published name:** N/A

**Confirmed Targeting**

2nd-siRNA NanoPARE

|          |          |
|----------|----------|
| ccm      | ccm      |
| cpe-2015 | cpe-2015 |
| cpe-2017 |          |
| cgr-dp   | cgr-dp   |
| cgr-pm   |          |
| cgr-mass |          |
| cin      | cin      |

### SEOR1

AT3G01680 - CI\_cpe-2015\_154

**Secondary siRNAs**

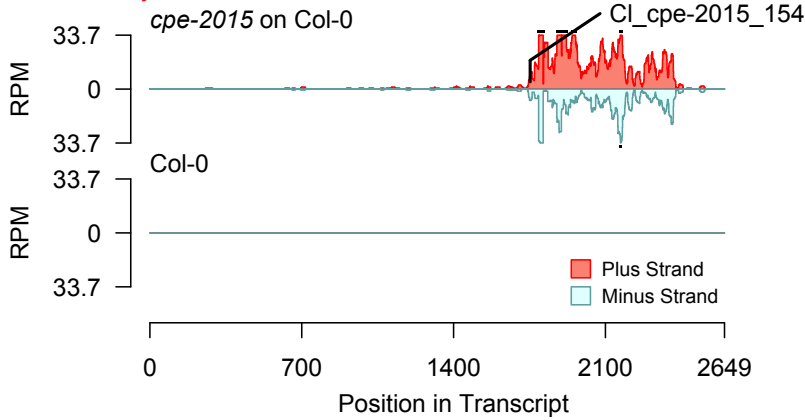

Degradome hits not found for sRNA

**2nd siRNAs: Phase diagram**

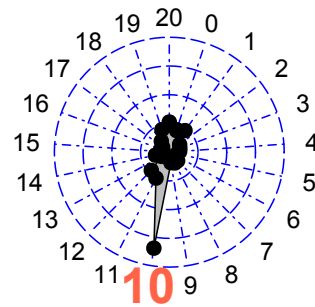

**2nd siRNAs: Size distribution**

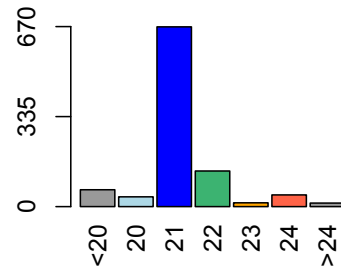

**Allenscore:** 5.5

**Target Interaction:**

5'- UUCCUGUACGGAGGAGAUGACU AT3G01680.1  
| : |||:|||||:|||||:|||||  
3'- ACAGAU AUGCCUCCUCUCCUGA CI\_cpe-2015\_1417

**Target Site:** 1753

**Superfamily:** SupFam\_5

**miRNAin ccm:** Yes

**Published name:** N/A

**Confirmed Targeting**

2nd-siRNA NanoPARE

|                 |                 |
|-----------------|-----------------|
| <i>ccm</i>      | <i>ccm</i>      |
| <i>cpe-2015</i> | <i>cpe-2015</i> |
| <i>cpe-2017</i> |                 |
| <i>cgr-dp</i>   | <i>cgr-dp</i>   |
| <i>cgr-pm</i>   |                 |
| <i>cgr-mass</i> |                 |
| <i>cin</i>      | <i>cin</i>      |

**SEOR1**

AT3G01680 - CI\_cpe-2015\_1417

**Secondary siRNAs**

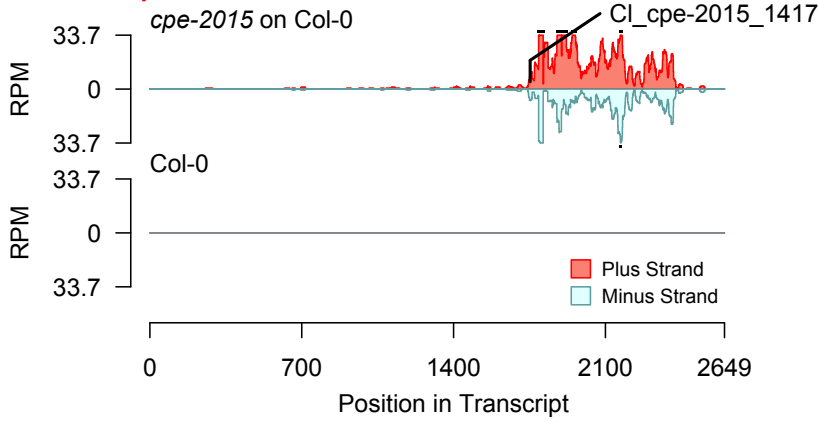

Degradome hits not found for sRNA

**2nd siRNAs: Phase diagram**

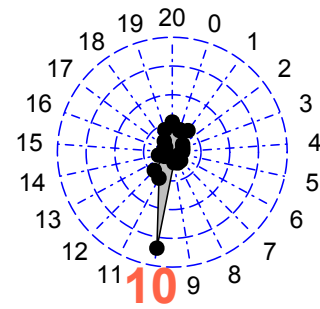

**2nd siRNAs: Size distribution**

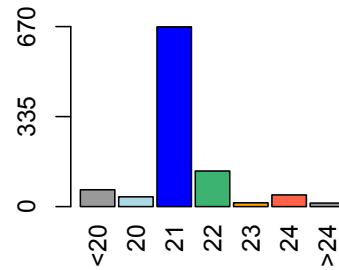

**Allenscore:** 6

**Target Interaction:**

5'- GGCCACUUUGAUUUCCACAUC AT3G01680.1  
 : ||| | | | : : : | | | | | | | |  
 3'- GUGGUGAAGUUAGAGUUGUAG CI\_cpe-2015\_191

**Target Site:** 2250

**Superfamily:** SupFam\_19

**miRNAin ccm:** Yes

**Published name:** N/A

**Confirmed Targeting**

| 2nd-siRNA       | NanoPARE        |
|-----------------|-----------------|
| <i>ccm</i>      | <i>ccm</i>      |
| <i>cpe-2015</i> | <i>cpe-2015</i> |
| <i>cpe-2017</i> |                 |
| <i>cgr-dp</i>   | <i>cgr-dp</i>   |
| <i>cgr-pm</i>   |                 |
| <i>cgr-mass</i> |                 |
| <i>cin</i>      | <i>cin</i>      |

|                 |                 |
|-----------------|-----------------|
| <i>ccm</i>      | <i>ccm</i>      |
| <i>cpe-2015</i> | <i>cpe-2015</i> |
| <i>cpe-2017</i> |                 |
| <i>cgr-dp</i>   | <i>cgr-dp</i>   |
| <i>cgr-pm</i>   |                 |
| <i>cgr-mass</i> |                 |
| <i>cin</i>      | <i>cin</i>      |

**SEOR1**

AT3G01680 - CI\_cpe-2015\_191

**Secondary siRNAs**

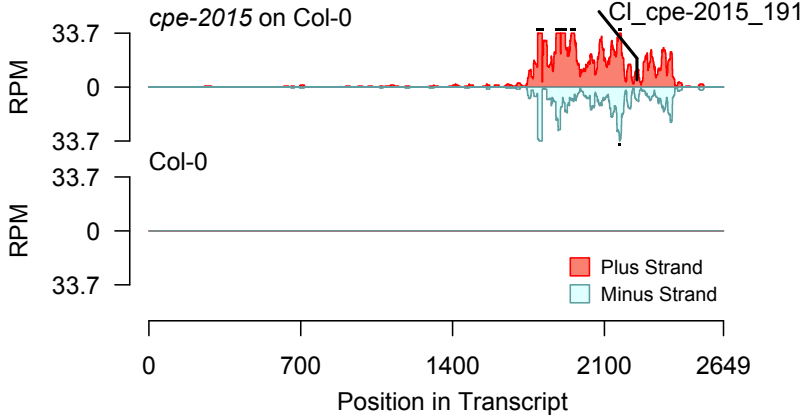

**2nd siRNAs: Phase diagram**

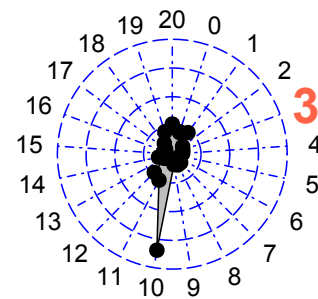

**2nd siRNAs: Size distribution**

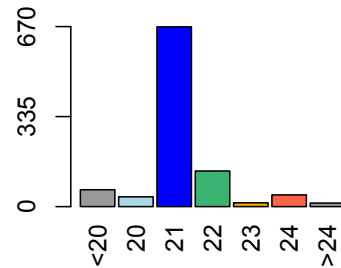

Degradome hits not found for sRNA

**Allenscore:** 5

**Target Interaction:**

5'- AUUGCUUCGAGUGUCAGCGUC AT3G01680.1  
| : : | | | | | | | | | | : : | : | |  
3'- UGAUGAAGCU - AGAGUUGUAG CI\_cpe-2015\_3720

**Target Site:** 2266

**Superfamily:** SupFam\_19

**miRNAin ccm:** Yes

**Published name:** N/A

**Confirmed Targeting**

2nd-siRNA NanoPARE

|                 |                 |
|-----------------|-----------------|
| <i>ccm</i>      | <i>ccm</i>      |
| <i>cpe-2015</i> | <i>cpe-2015</i> |
| <i>cpe-2017</i> |                 |
| <i>cgr-dp</i>   | <i>cgr-dp</i>   |
| <i>cgr-pm</i>   |                 |
| <i>cgr-mass</i> |                 |
| <i>cin</i>      | <i>cin</i>      |

**SEOR1**

AT3G01680 - CI\_cpe-2015\_3720

**Secondary siRNAs**

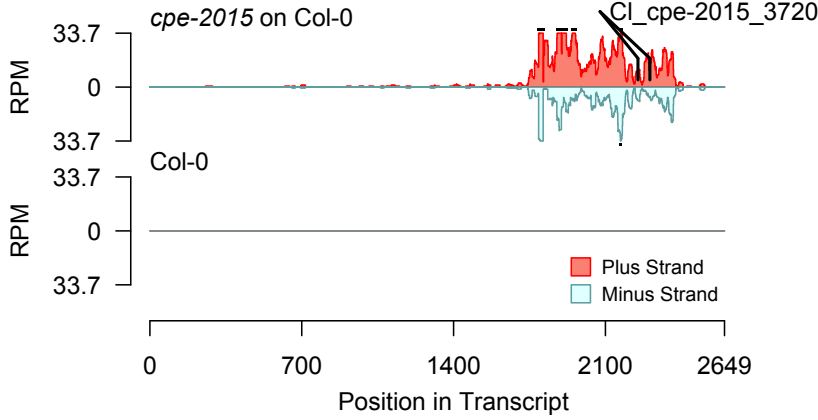

Degradome hits not found for sRNA

**2nd siRNAs: Phase diagram**

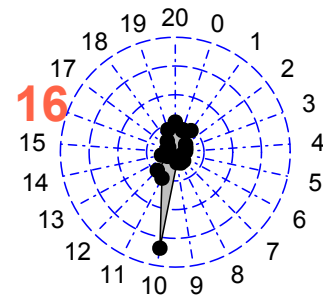

**2nd siRNAs: Size distribution**

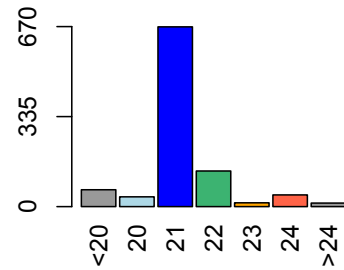

**Allenscore:** 3.5

**Target Interaction:**

5'- UUCCUGUACGGAGGAGAUGACU AT3G01680.1  
|:|||||  
3'- AGGACAUGCCUCCUCUUCUGU CI\_cpe-2017\_89

**Target Site:** 1753

**Superfamily:** SupFam\_5

**miRNAin ccm:** Yes

**Published name:** N/A

**Confirmed Targeting**

2nd-siRNA NanoPARE

|                 |                 |
|-----------------|-----------------|
| <i>ccm</i>      | <i>ccm</i>      |
| <i>cpe-2015</i> | <i>cpe-2015</i> |
| <i>cpe-2017</i> |                 |
| <i>cgr-dp</i>   | <i>cgr-dp</i>   |
| <i>cgr-pm</i>   |                 |
| <i>cgr-mass</i> |                 |
| <i>cin</i>      | <i>cin</i>      |

**SEOR1**

AT3G01680 - CI\_cpe-2017\_89

**Secondary siRNAs**

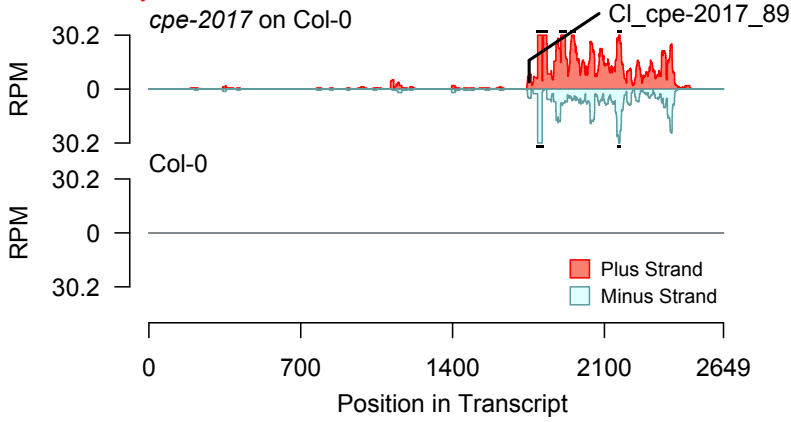

Degradome hits not found for sRNA

**2nd siRNAs: Phase diagram**

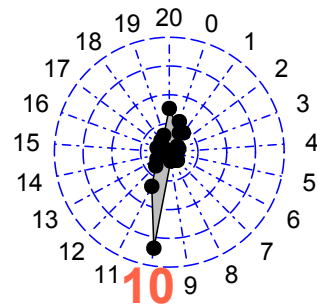

**2nd siRNAs: Size distribution**

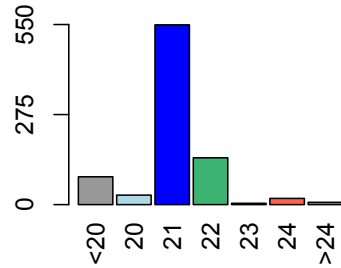

**Allenscore:** 5.5

**Target Interaction:**

```

5'- UUCCUGUACGGAGGAGAUGACU   AT3G01680.1
   | | | : | | | | | | | | | | | | |
3'- AUGGAUAUGCCUCCUCUCCUGU   CI_cpe-2017_181

```

**Target Site:** 1753

**Superfamily:** SupFam\_5

**miRNAin ccm:** Yes

**Published name:** N/A

**Confirmed Targeting**

*2nd-siRNA*     *NanoPARE*

|                 |          |
|-----------------|----------|
| <b>ccm</b>      | ccm      |
| <b>cpe-2015</b> | cpe-2015 |
| <b>cpe-2017</b> |          |
| cgr-dp          | cgr-dp   |
| cgr-pm          |          |
| <b>cgr-mass</b> |          |
| cin             | cin      |

**SEOR1**

AT3G01680 - CI\_cpe-2017\_181

**Secondary siRNAs**

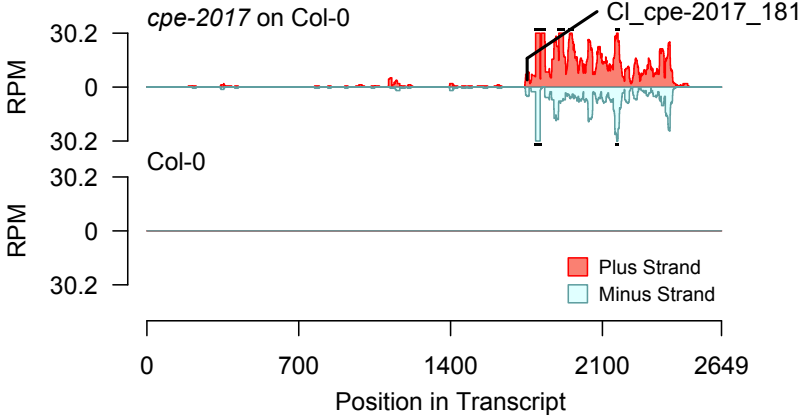

**2nd siRNAs: Phase diagram**

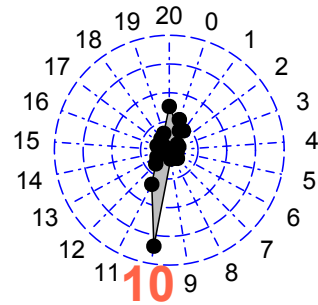

**2nd siRNAs: Size distribution**

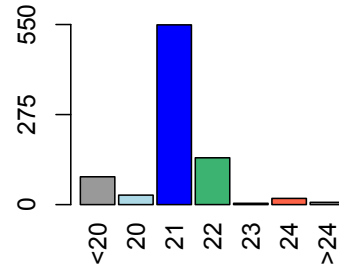

Degradome hits not found for sRNA

**Allenscore:** 5.5

**Target Interaction:**

5'- UUCCUGUACGGAGGAGAUGACU AT3G01680.1  
| : |||||  
3'- ACAGAU AUGCCUCCUCUCCUGA CI\_cpe-2017\_1111

**Target Site:** 1753

**Superfamily:** SupFam\_5

**miRNAin ccm:** Yes

**Published name:** N/A

**Confirmed Targeting**

2nd-siRNA NanoPARE

|                 |                 |
|-----------------|-----------------|
| <i>ccm</i>      | <i>ccm</i>      |
| <i>cpe-2015</i> | <i>cpe-2015</i> |
| <i>cpe-2017</i> |                 |
| <i>cgr-dp</i>   | <i>cgr-dp</i>   |
| <i>cgr-pm</i>   |                 |
| <i>cgr-mass</i> |                 |
| <i>cin</i>      | <i>cin</i>      |

**SEOR1**

AT3G01680 - CI\_cpe-2017\_1111

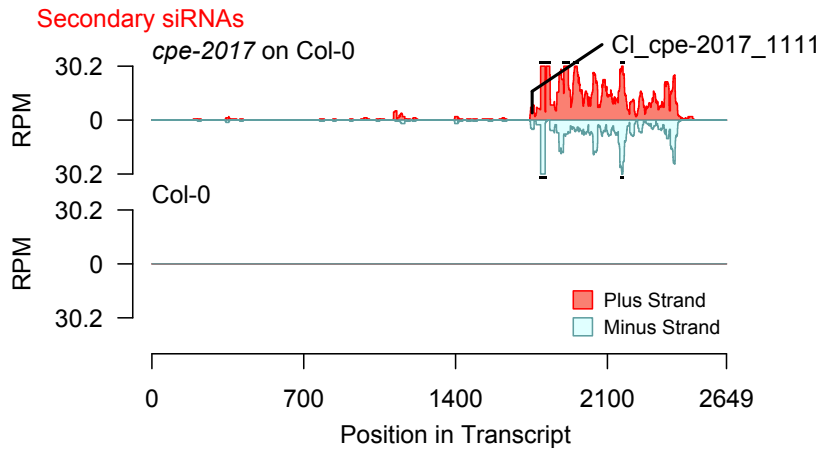

**2nd siRNAs: Phase diagram**



**2nd siRNAs: Size distribution**

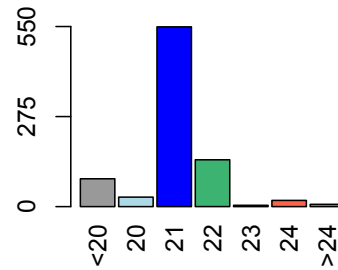

Degradome hits not found for sRNA



**Allenscore:** 6

**Target Interaction:**

5'- GGCCACUUUGAUUUCCACAUC AT3G01680.1  
 : || | | | | : : | | : | | | | | | | |  
 3'- GUGGUGAAGUUAGAGUUGUAG CI\_cpe-2017\_172

**Target Site:** 2250

**Superfamily:** SupFam\_19

**miRNAin ccm:** Yes

**Published name:** N/A

**Confirmed Targeting**

2nd-siRNA NanoPARE

|                 |                 |
|-----------------|-----------------|
| <i>ccm</i>      | <i>ccm</i>      |
| <i>cpe-2015</i> | <i>cpe-2015</i> |
| <i>cpe-2017</i> |                 |
| <i>cgr-dp</i>   | <i>cgr-dp</i>   |
| <i>cgr-pm</i>   |                 |
| <i>cgr-mass</i> |                 |
| <i>cin</i>      | <i>cin</i>      |

**SEOR1**

AT3G01680 - CI\_cpe-2017\_172

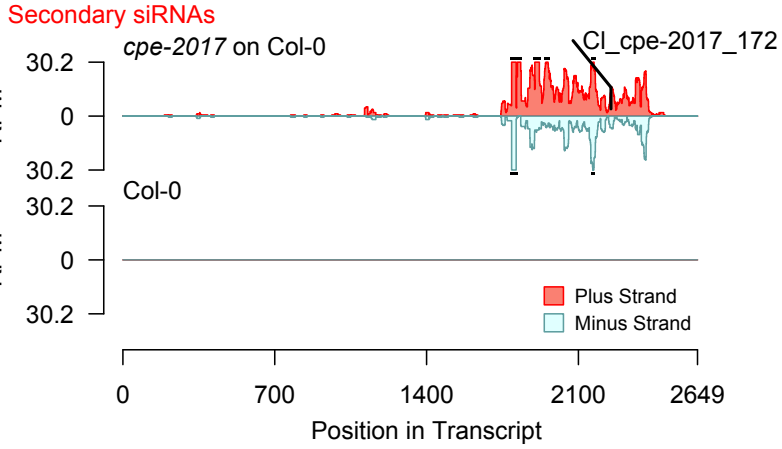

**2nd siRNAs: Phase diagram**

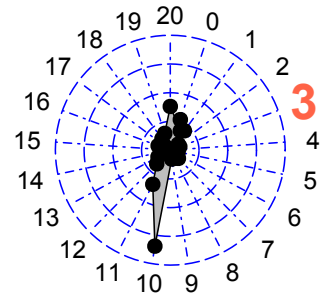

**2nd siRNAs: Size distribution**

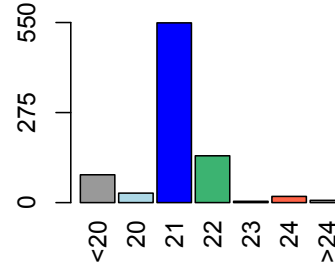

Degradome hits not found for sRNA

**Allenscore:** 5

**Target Interaction:**

5'- AUUGCUUCGAGUGUCAGCGUC AT3G01680.1  
| : : | | | | | | | | | | : : | | |  
3'- UGAUGAAGCU - AGAGUUGUAG CI\_cpe-2017\_2830

**Target Site:** 2266

**Superfamily:** SupFam\_19

**miRNAin ccm:** Yes

**Published name:** N/A

**Confirmed Targeting**

2nd-siRNA NanoPARE

|                 |          |
|-----------------|----------|
| <b>ccm</b>      | ccm      |
| <b>cpe-2015</b> | cpe-2015 |
| <b>cpe-2017</b> |          |
| cgr-dp          | cgr-dp   |
| cgr-pm          |          |
| <b>cgr-mass</b> |          |
| cin             | cin      |

**SEOR1**

AT3G01680 - CI\_cpe-2017\_2830

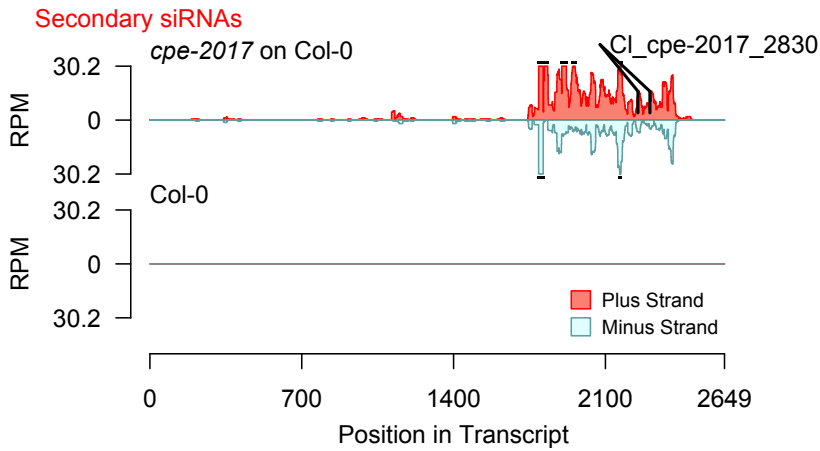

Degradome hits not found for sRNA

**2nd siRNAs: Phase diagram**

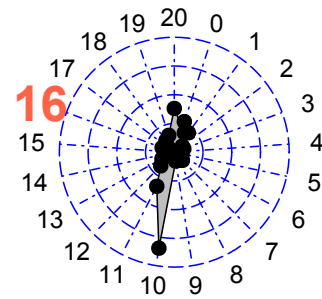

**2nd siRNAs: Size distribution**

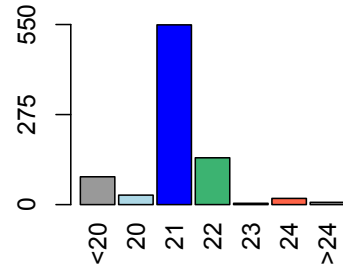

Allenscore: 5.5

**Target Interaction:**

5'- UUGUAUGGUGAGCCUGGAACU AT4G29040.1  
      | | | | | : | | | | | | | | | |  
3'- UACAUACUUCUCAGACCUUGU CI\_cin\_1915

**Target Site:** 776

**Superfamily:** SupFam\_1368

**miRNAin ccm:** N/A

**Published name:** N/A

**Confirmed Targeting**

2nd-siRNA NanoPARE

|                 |                 |
|-----------------|-----------------|
| <i>ccm</i>      | <i>ccm</i>      |
| <i>cpe-2015</i> | <i>cpe-2015</i> |
| <i>cpe-2017</i> |                 |
| <i>cgr-dp</i>   | <i>cgr-dp</i>   |
| <i>cgr-pm</i>   |                 |
| <i>cgr-mass</i> |                 |
| <i>cin</i>      | <i>cin</i>      |

**RPT2a**

AT4G29040 - CI\_cin\_1915

**Secondary siRNAs**

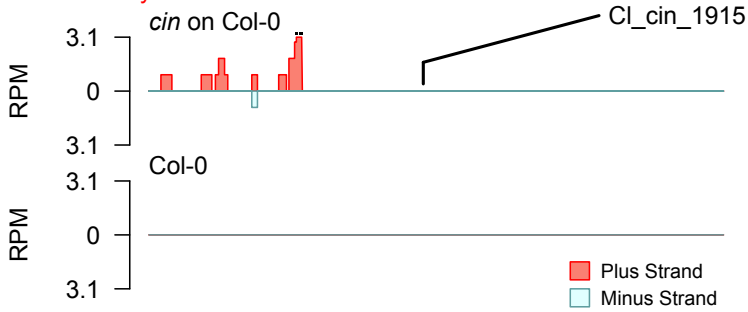

Diff. Exp. secondary siRNA locus not found

**5' read ends (NanoPARE)**

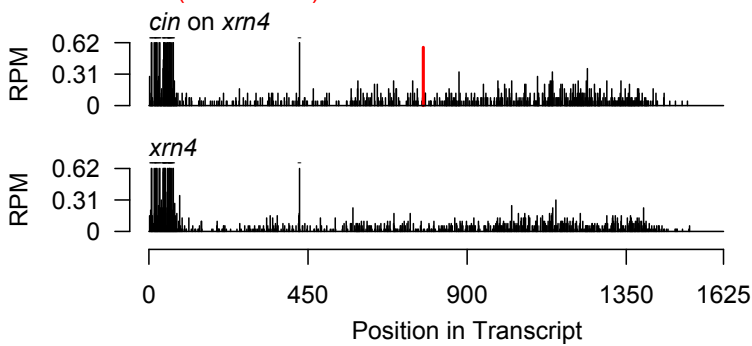

**Allenscore:** 5

**Target Interaction:**

5'- GUCCCCUCCAAAGAUUCCUGA AT4G23630.1  
   ||| ||| |||||:||||| ||  
3'- CAGAGGUGGUUUUUUAAGGUCU CI\_cgr-dp\_91

**Target Site:** 1080

**Superfamily:** SupFam\_207

**miRNAin ccm:** N/A

**Published name:** N/A

**Confirmed Targeting**

2nd-siRNA NanoPARE

|                 |                 |
|-----------------|-----------------|
| <i>ccm</i>      | <i>ccm</i>      |
| <i>cpe-2015</i> | <i>cpe-2015</i> |
| <i>cpe-2017</i> |                 |
| <i>cgr-dp</i>   | <i>cgr-dp</i>   |
| <i>cgr-pm</i>   |                 |
| <i>cgr-mass</i> |                 |
| <i>cin</i>      | <i>cin</i>      |

**BT11**

AT4G23630 - CI\_cgr-dp\_91

**Secondary siRNAs**

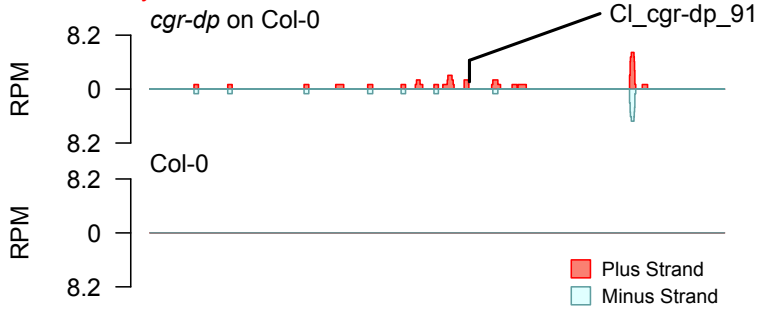

Diff. Exp. secondary siRNA locus not found

**5' read ends (NanoPARE)**

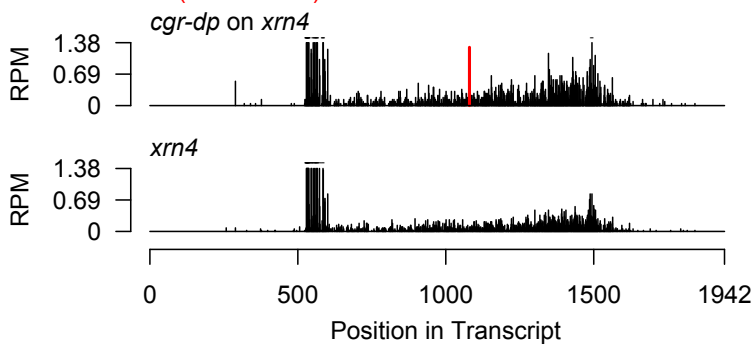

Allenscore: 4.5

Target Interaction:

```

5'- UGCAGUGUCGAGGGUUGGAAGU AT4G27630.1
   ||||| || |::|||:|||||||
3'- ACGU - AC - GUUCCUAACCUUCU CI_cgr-dp_190

```

Target Site: 1649

Superfamily: SupFam\_895

miRNAin ccm: N/A

Published name: N/A

Confirmed Targeting

| 2nd-siRNA       | NanoPARE        |
|-----------------|-----------------|
| <i>ccm</i>      | <i>ccm</i>      |
| <i>cpe-2015</i> | <i>cpe-2015</i> |
| <i>cpe-2017</i> |                 |
| <i>cgr-dp</i>   | <i>cgr-dp</i>   |
| <i>cgr-pm</i>   |                 |
| <i>cgr-mass</i> |                 |
| <i>cin</i>      | <i>cin</i>      |

|                 |                 |
|-----------------|-----------------|
| <i>ccm</i>      | <i>ccm</i>      |
| <i>cpe-2015</i> | <i>cpe-2015</i> |
| <i>cpe-2017</i> |                 |
| <i>cgr-dp</i>   | <i>cgr-dp</i>   |
| <i>cgr-pm</i>   |                 |
| <i>cgr-mass</i> |                 |
| <i>cin</i>      | <i>cin</i>      |

## GTG2

AT4G27630 - CI\_cgr-dp\_190

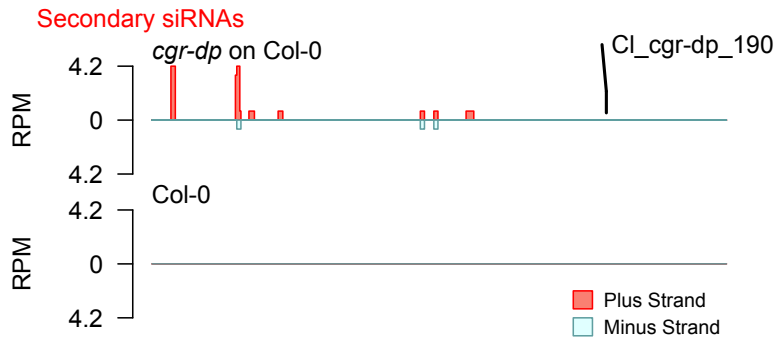

Diff. Exp. secondary siRNA locus not found

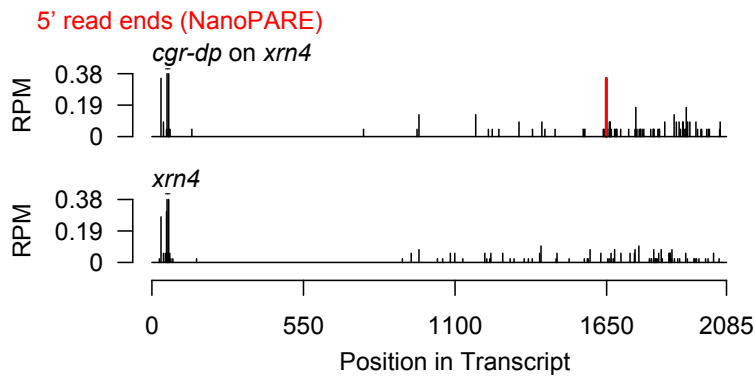



**Allenscore:** 6

**Target Interaction:**

```
5'- AACCGAAGAAGAUG - AAAGCUACA  AT3G51670.1
   | | | | | | | | | | | | | | | |
3'- UGGGCUUCUUCUACUUUUCGA - GU  CI_cgr-dp_279
```

**Target Site:** 1326

**Superfamily:** SupFam\_37

**miRNAin ccm:** N/A

**Published name:** N/A

**Confirmed Targeting**

2nd-siRNA    NanoPARE

|                 |                 |
|-----------------|-----------------|
| <i>ccm</i>      | <i>ccm</i>      |
| <i>cpe-2015</i> | <i>cpe-2015</i> |
| <i>cpe-2017</i> |                 |
| <i>cgr-dp</i>   | <i>cgr-dp</i>   |
| <i>cgr-pm</i>   |                 |
| <i>cgr-mass</i> |                 |
| <i>cin</i>      | <i>cin</i>      |

**SEC14\_cytosolic\_factor\_family\_protein\_\_\_**

AT3G51670 - CI\_cgr-dp\_279

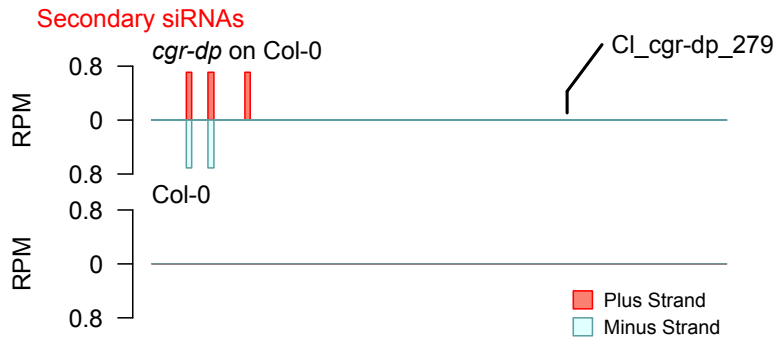

Diff. Exp. secondary siRNA  
locus not found

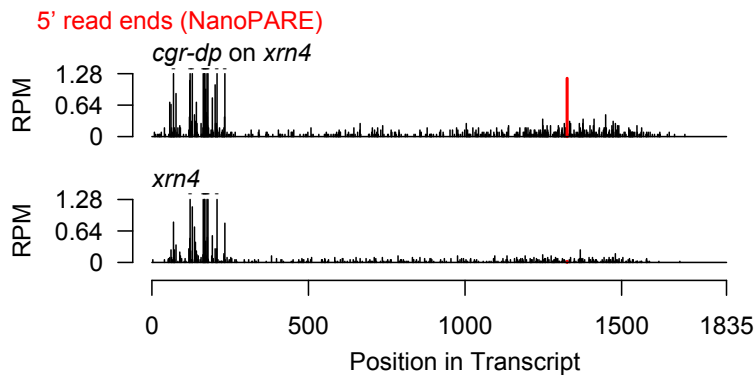

**Allenscore:** 5

**Target Interaction:**

5'- CUCACGUGACCUUGCUUCUCCG AT5G39610.1  
      ||||| :  
3'- UUUUGCACGGGACGAAGAGGU CI\_cgr-dp\_26729

**Target Site:** 904

**Superfamily:** SupFam\_187

**miRNAin ccm:** N/A

**Published name:** N/A

**Confirmed Targeting**

2nd-siRNA NanoPARE

| 2nd-siRNA       | NanoPARE        |
|-----------------|-----------------|
| <i>ccm</i>      | <i>ccm</i>      |
| <i>cpe-2015</i> | <i>cpe-2015</i> |
| <i>cpe-2017</i> |                 |
| <i>cgr-dp</i>   | <i>cgr-dp</i>   |
| <i>cgr-pm</i>   |                 |
| <i>cgr-mass</i> |                 |
| <i>cin</i>      | <i>cin</i>      |

# NAC6

AT5G39610 - CI\_cgr-dp\_26729

**Secondary siRNAs**

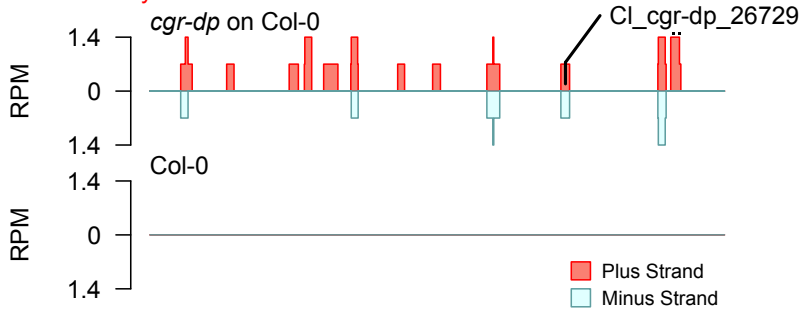

Diff. Exp. secondary siRNA locus not found

**5' read ends (NanoPARE)**

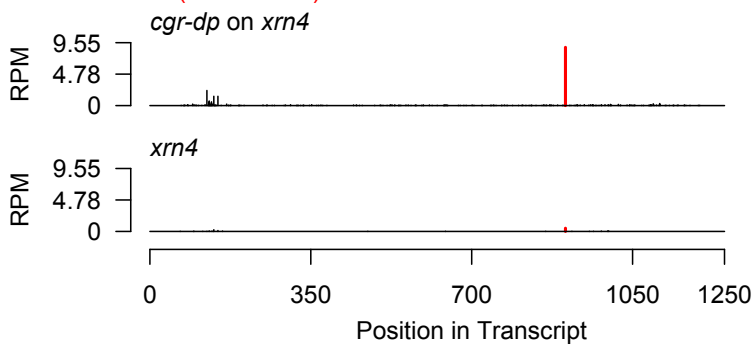



Allenscore: 4.5

**Target Interaction:**

5'- CGGGUUACGUUCCUCCAGAGUA AT4G39400.1  
           :|:|:|:|:|:|:|           |||:|:|:|:|:|:|:|  
3'- AUCCGAUGUACGGAGGUCUCAU CI\_cgr-mass\_20246

**Target Site:** 3530

**Superfamily:** SupFam\_59

**miRNAin ccm:** N/A

**Published name:** N/A

**Confirmed Targeting**

2nd-siRNA      NanoPARE

|                 |                 |
|-----------------|-----------------|
| <i>ccm</i>      | <i>ccm</i>      |
| <i>cpe-2015</i> | <i>cpe-2015</i> |
| <i>cpe-2017</i> |                 |
| <i>cgr-dp</i>   | <i>cgr-dp</i>   |
| <i>cgr-pm</i>   |                 |
| <i>cgr-mass</i> |                 |
| <i>cin</i>      | <i>cin</i>      |

**BRI1**

AT4G39400 - CI\_cgr-mass\_20246

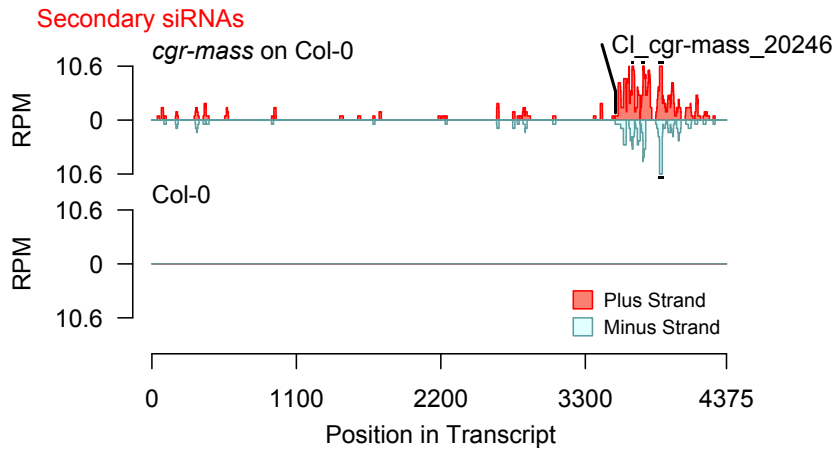

**2nd siRNAs: Phase diagram**

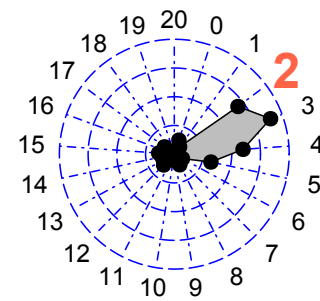

**2nd siRNAs: Size distribution**

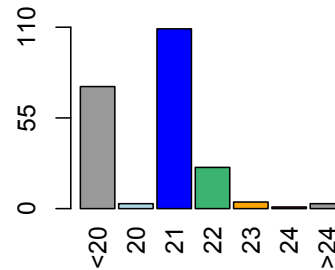

Degradome hits not found for sRNA

Allenscore: 3.5

**Target Interaction:**

5'- AAAGGGAAGUCAUCCUUGGCU AT1G17590.1  
 ||||:||||||||||||||||||  
 3'- AGUCCUUUCAGUAGGAACCGU CI\_cin\_1673

**Target Site:** 1329

**Superfamily:** SupFam\_1364

**miRNAin ccm:** N/A

**Published name:** N/A

**Confirmed Targeting**

| 2nd-siRNA       | NanoPARE        |
|-----------------|-----------------|
| <i>ccm</i>      | <i>ccm</i>      |
| <i>cpe-2015</i> | <i>cpe-2015</i> |
| <i>cpe-2017</i> |                 |
| <i>cgr-dp</i>   | <i>cgr-dp</i>   |
| <i>cgr-pm</i>   |                 |
| <i>cgr-mass</i> |                 |
| <i>cin</i>      | <i>cin</i>      |

|                 |                 |
|-----------------|-----------------|
| <i>ccm</i>      | <i>ccm</i>      |
| <i>cpe-2015</i> | <i>cpe-2015</i> |
| <i>cpe-2017</i> |                 |
| <i>cgr-dp</i>   | <i>cgr-dp</i>   |
| <i>cgr-pm</i>   |                 |
| <i>cgr-mass</i> |                 |
| <i>cin</i>      | <i>cin</i>      |

**NF-YA8**

AT1G17590 - CI\_cin\_1673

**Secondary siRNAs**

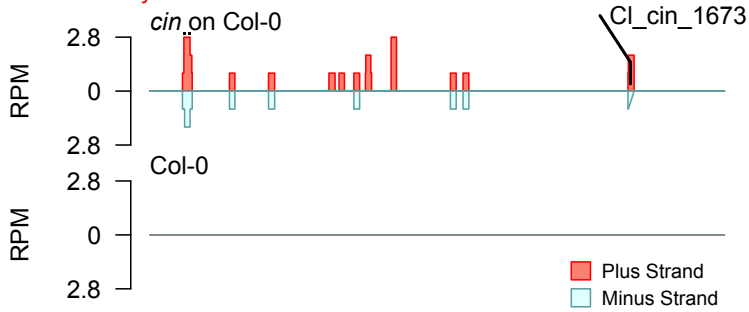

Diff. Exp. secondary siRNA locus not found

**5' read ends (NanoPARE)**

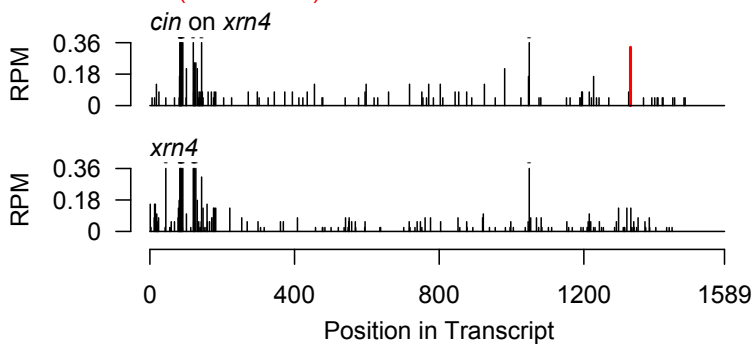

Allescore: 3

Target Interaction:

```

5'- CAGGGAUACGCUGCUCCAGAAUA AT5G02290.1
      |||||  |||||  |||||  |||||  |||||  |||||
3'- GUCCCAAUGCGACGUGGUCUUAU CI_ccm_818

```

Target Site: 1120

Superfamily: SupFam\_124

miRNAin ccm: No

Published name: Not published

**Confirmed Targeting**

| 2nd-siRNA       | NanoPARE        |
|-----------------|-----------------|
| <i>ccm</i>      | <i>ccm</i>      |
| <i>cpe-2015</i> | <i>cpe-2015</i> |
| <i>cpe-2017</i> |                 |
| <i>cgr-dp</i>   | <i>cgr-dp</i>   |
| <i>cgr-pm</i>   |                 |
| <i>cgr-mass</i> |                 |
| <i>cin</i>      | <i>cin</i>      |

### NAK

AT5G02290 - CI\_ccm\_818

Secondary siRNAs

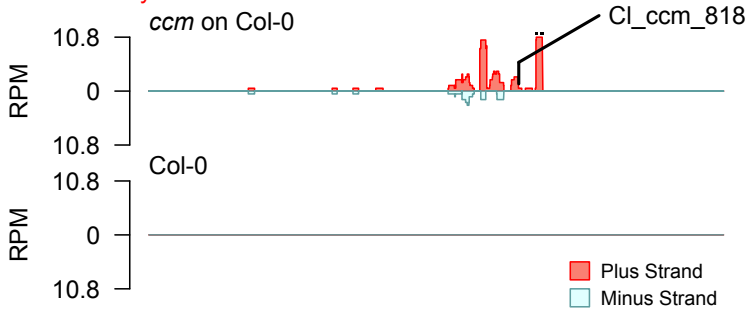

Diff. Exp. secondary siRNA locus not found

5' read ends (NanoPARE)

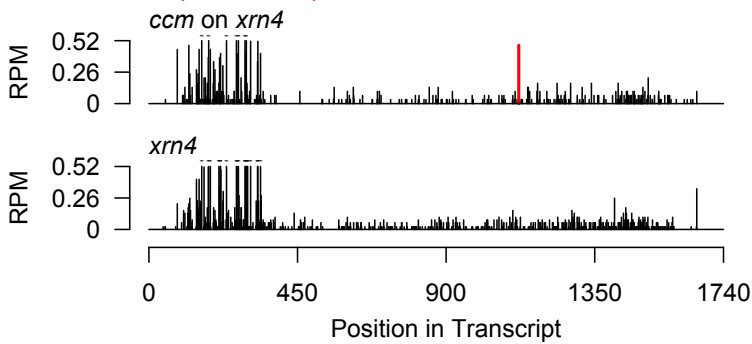

**Allenscore:** 4.5

**Target Interaction:**

5'- CCGUUUCUACUCCACCAUCACA AT4G28300.1  
| | | | | : | | | | | : | | | |  
3'- UUCAAAGGUAAGGUGGUGUGU CI\_cgr-dp\_307

**Target Site:** 990

**Superfamily:** SupFam\_897

**miRNAin ccm:** N/A

**Published name:** N/A

**Confirmed Targeting**

2nd-siRNA NanoPARE

|                 |                 |
|-----------------|-----------------|
| <i>ccm</i>      | <i>ccm</i>      |
| <i>cpe-2015</i> | <i>cpe-2015</i> |
| <i>cpe-2017</i> |                 |
| <i>cgr-dp</i>   | <i>cgr-dp</i>   |
| <i>cgr-pm</i>   |                 |
| <i>cgr-mass</i> |                 |
| <i>cin</i>      | <i>cin</i>      |

**DUF1421\_containing\_protein**

AT4G28300 - CI\_cgr-dp\_307

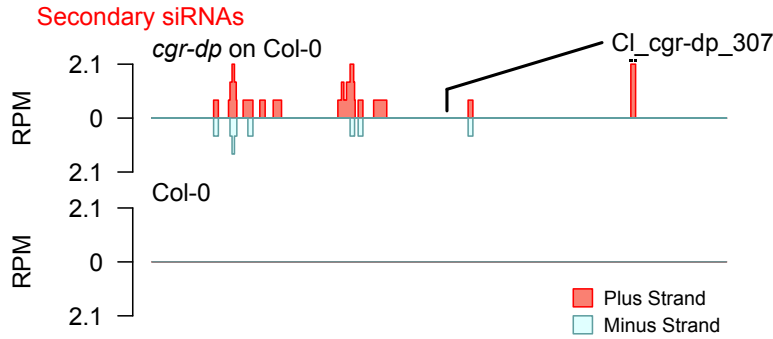

Diff. Exp. secondary siRNA locus not found

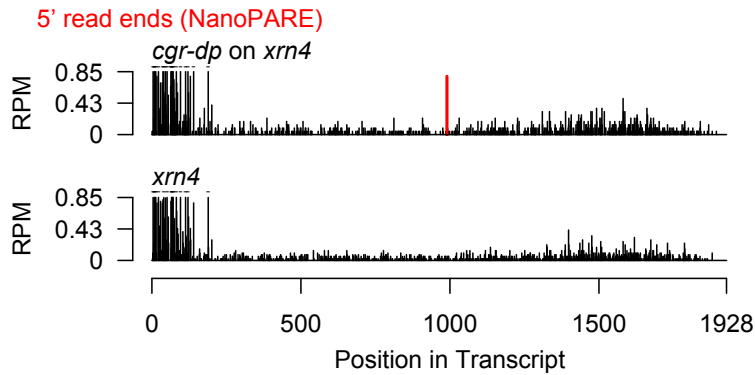

**Allenscore:** 3.5

**Target Interaction:**

5'- GAGAUGUUGAGAUUGAAGUUG AT5G07350.1  
 : | | | | | | | | | | | | | | | | | | | | | | | | | |  
 3'- UUCUACAACUCUAACUUCAUC CI\_ccm\_935

**Target Site:** 2216

**Superfamily:** SupFam\_287

**miRNAin ccm:** Yes

**Published name:** ccm-MIR12464\*

**Confirmed Targeting**

2nd-siRNA NanoPARE

|                 |                 |
|-----------------|-----------------|
| <i>ccm</i>      | <i>ccm</i>      |
| <i>cpe-2015</i> | <i>cpe-2015</i> |
| <i>cpe-2017</i> |                 |
| <i>cgr-dp</i>   | <i>cgr-dp</i>   |
| <i>cgr-pm</i>   |                 |
| <i>cgr-mass</i> |                 |
| <i>cin</i>      | <i>cin</i>      |

**Tudor1**

AT5G07350 - CI\_ccm\_935

**Secondary siRNAs**

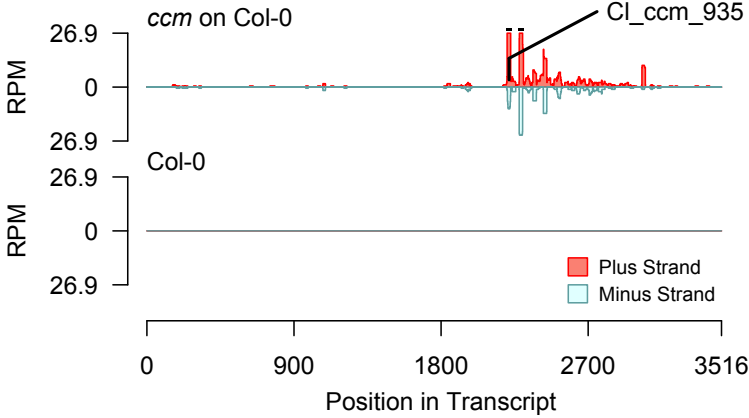

**2nd siRNAs: Phase diagram**

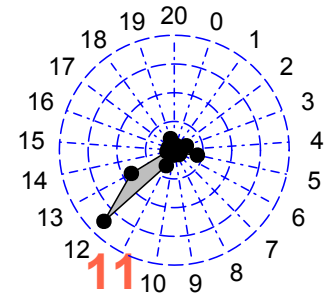

**2nd siRNAs: Size distribution**

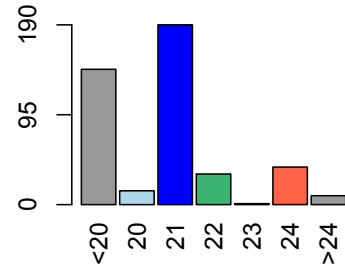

Degradome hits not found for sRNA

**Allenscore:** 3.5

**Target Interaction:**

5'- GAGAUGUUGAGAUUGAAGUUG AT5G07350.1  
: |||||  
3'- UUCUACAACUCUAACUUCAUC CI\_cpe-2015\_358

**Target Site:** 2216

**Superfamily:** SupFam\_287

**miRNAin ccm:** Yes

**Published name:** N/A

**Confirmed Targeting**

2nd-siRNA NanoPARE

|                 |                 |
|-----------------|-----------------|
| <i>ccm</i>      | <i>ccm</i>      |
| <i>cpe-2015</i> | <i>cpe-2015</i> |
| <i>cpe-2017</i> |                 |
| <i>cgr-dp</i>   | <i>cgr-dp</i>   |
| <i>cgr-pm</i>   |                 |
| <i>cgr-mass</i> |                 |
| <i>cin</i>      | <i>cin</i>      |

**Tudor1**

AT5G07350 - CI\_cpe-2015\_358

**Secondary siRNAs**

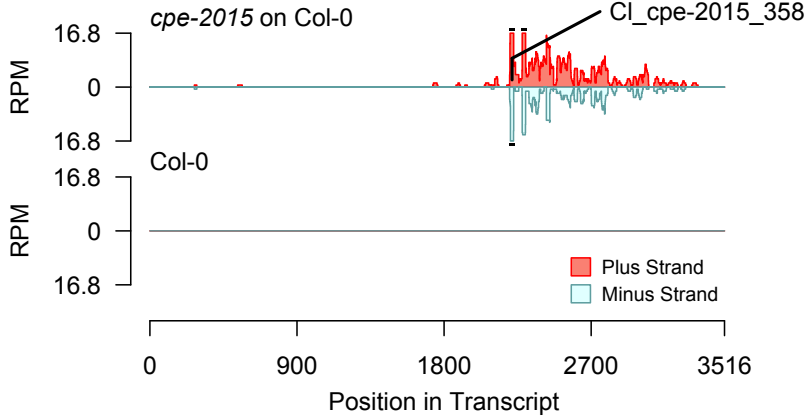

Degradome hits not found for sRNA

**2nd siRNAs: Phase diagram**

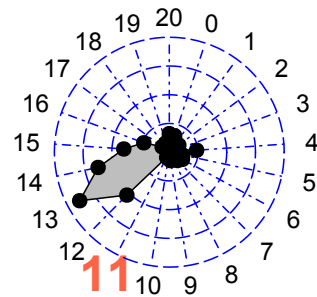

**2nd siRNAs: Size distribution**

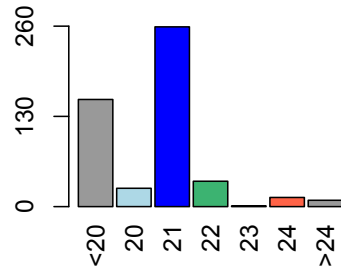

**Allenscore:** 3.5

**Target Interaction:**

5'- GAGAUGUUGAGAUUGAAGUUG AT5G07350.1  
: |||||  
3'- UUCUACAACUCUAACUUCAUC CI\_cpe-2017\_269

**Target Site:** 2216

**Superfamily:** SupFam\_287

**miRNAin ccm:** Yes

**Published name:** N/A

**Confirmed Targeting**

2nd-siRNA NanoPARE

|                 |                 |
|-----------------|-----------------|
| <i>ccm</i>      | <i>ccm</i>      |
| <i>cpe-2015</i> | <i>cpe-2015</i> |
| <i>cpe-2017</i> |                 |
| <i>cgr-dp</i>   | <i>cgr-dp</i>   |
| <i>cgr-pm</i>   |                 |
| <i>cgr-mass</i> |                 |
| <i>cin</i>      | <i>cin</i>      |

**Tudor1**

AT5G07350 - CI\_cpe-2017\_269

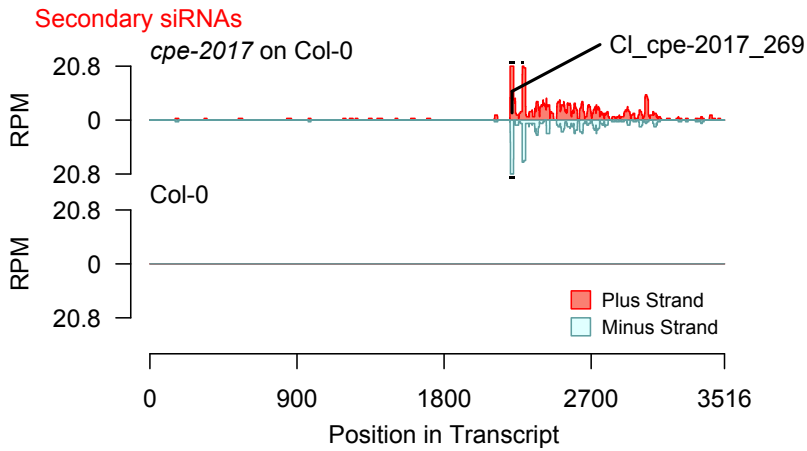

**2nd siRNAs: Phase diagram**

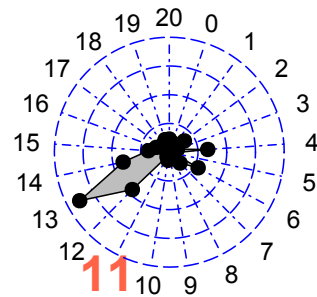

**2nd siRNAs: Size distribution**

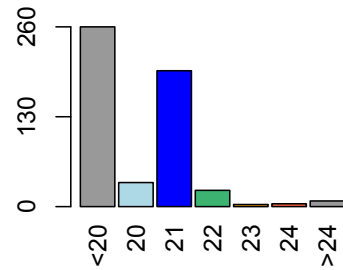

Degradome hits not found for sRNA

**Allenscore:** 1.5

**Target Interaction:**

5'- GCGGCAAUUCAUUCUUGGCUU AT3G20910.1  
: ||||| :  
3'- UGCCGUUAAGUAGGAACCGAA CI\_ccm\_2887

**Target Site:** 1073

**Superfamily:** SupFam\_72

**miRNAin ccm:** Yes

**Published name:** Not published

**Confirmed Targeting**

2nd-siRNA NanoPARE

|                 |                 |
|-----------------|-----------------|
| <i>ccm</i>      | <i>ccm</i>      |
| <i>cpe-2015</i> | <i>cpe-2015</i> |
| <i>cpe-2017</i> |                 |
| <i>cgr-dp</i>   | <i>cgr-dp</i>   |
| <i>cgr-pm</i>   |                 |
| <i>cgr-mass</i> |                 |
| <i>cin</i>      | <i>cin</i>      |

**NF-YA9**

AT3G20910 - CI\_ccm\_2887

**Secondary siRNAs**

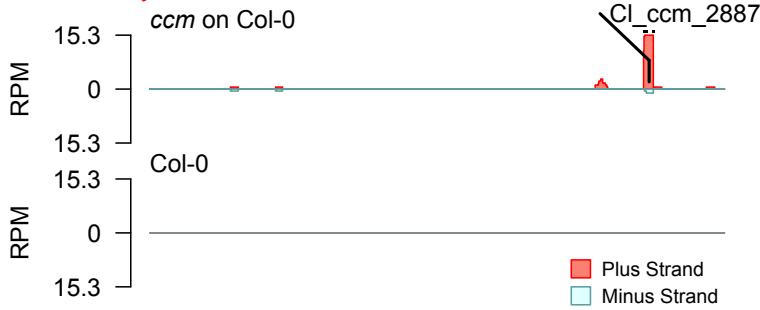

Diff. Exp. secondary siRNA locus not found

**5' read ends (NanoPARE)**

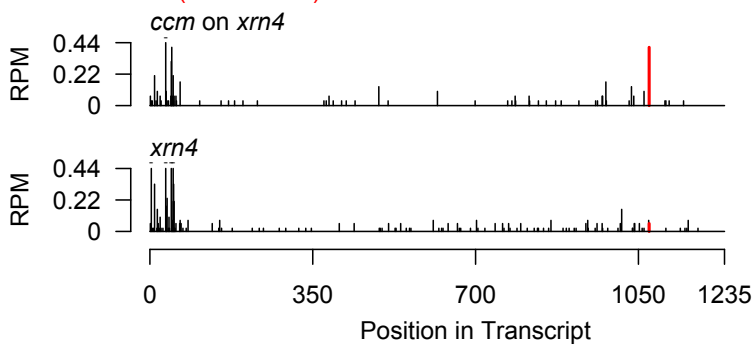



**Allenscore:** 4

**Target Interaction:**

5'- GCGGCAAUUCUUCUUGGCUU AT3G20910.1  
: : | | | | | | | | | | : | | | | | | | | | |  
3'- UUGCCGUUUAGUAGGAACCGAU CI\_ccm\_2720

**Target Site:** 1073

**Superfamily:** SupFam\_72

**miRNAin ccm:** Yes

**Published name:** Not published

**Confirmed Targeting**

2nd-siRNA NanoPARE

|                 |                 |
|-----------------|-----------------|
| <i>ccm</i>      | <i>ccm</i>      |
| <i>cpe-2015</i> | <i>cpe-2015</i> |
| <i>cpe-2017</i> |                 |
| <i>cgr-dp</i>   | <i>cgr-dp</i>   |
| <i>cgr-pm</i>   |                 |
| <i>cgr-mass</i> |                 |
| <i>cin</i>      | <i>cin</i>      |

**NF-YA9**

AT3G20910 - CI\_ccm\_2720

**Secondary siRNAs**

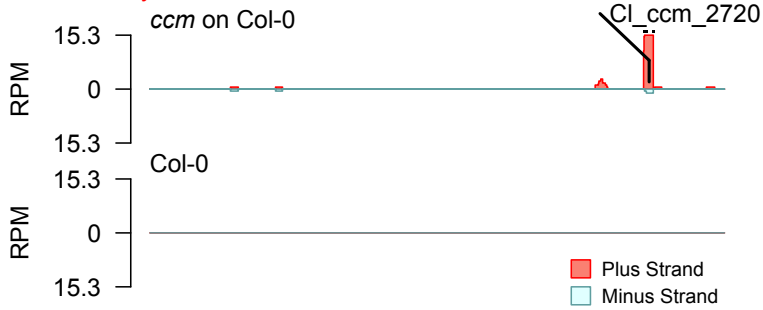

Diff. Exp. secondary siRNA locus not found

**5' read ends (NanoPARE)**



**Allenscore:** 6

**Target Interaction:**

5'- UCAAGAACGCUACGAGGAACUUUC AT2G02800.1  
| | : | | | | | : | | | | : | | | | :  
3'- UUUUUUUUGCGGUGCUCUUUGAAGU CI\_cgr-dp\_62946

**Target Site:** 582

**Superfamily:** SupFam\_26

**miRNAin ccm:** Yes

**Published name:** N/A

**Confirmed Targeting**

2nd-siRNA NanoPARE

|                 |                 |
|-----------------|-----------------|
| <i>ccm</i>      | <i>ccm</i>      |
| <i>cpe-2015</i> | <i>cpe-2015</i> |
| <i>cpe-2017</i> |                 |
| <i>cgr-dp</i>   | <i>cgr-dp</i>   |
| <i>cgr-pm</i>   |                 |
| <i>cgr-mass</i> |                 |
| <i>cin</i>      | <i>cin</i>      |

**APK2B**

AT2G02800 - CI\_cgr-dp\_62946

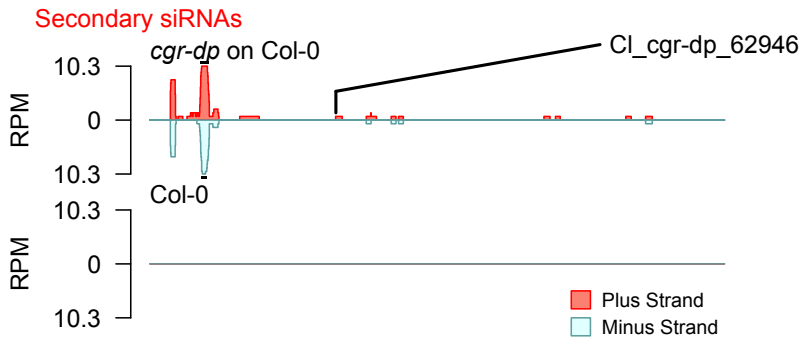

Diff. Exp. secondary siRNA locus not found

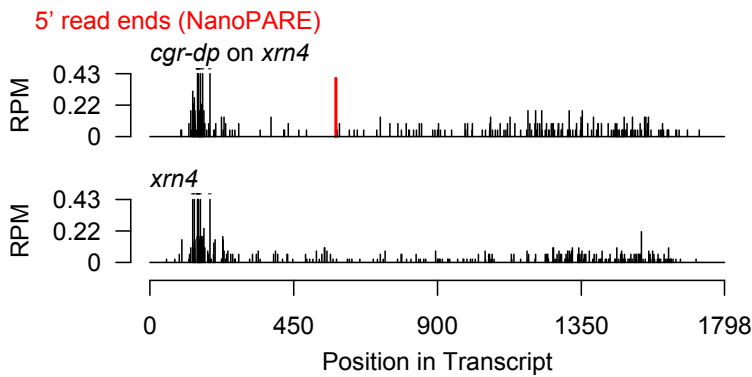

**Allenscore:** 4

**Target Interaction:**

5'- AGAACGCUACGAGGAACUUUC AT2G02800.1  
| : | | | | | : | | | | | : | | | | | :  
3'- UUUUGCGGUGCUCUUUGAAGU CI\_cgr-dp\_29

**Target Site:** 582

**Superfamily:** SupFam\_26

**miRNAin ccm:** Yes

**Published name:** N/A

**Confirmed Targeting**

2nd-siRNA NanoPARE

|                 |                 |
|-----------------|-----------------|
| <i>ccm</i>      | <i>ccm</i>      |
| <i>cpe-2015</i> | <i>cpe-2015</i> |
| <i>cpe-2017</i> |                 |
| <i>cgr-dp</i>   | <i>cgr-dp</i>   |
| <i>cgr-pm</i>   |                 |
| <i>cgr-mass</i> |                 |
| <i>cin</i>      | <i>cin</i>      |

**APK2B**

AT2G02800 - CI\_cgr-dp\_29

**Secondary siRNAs**

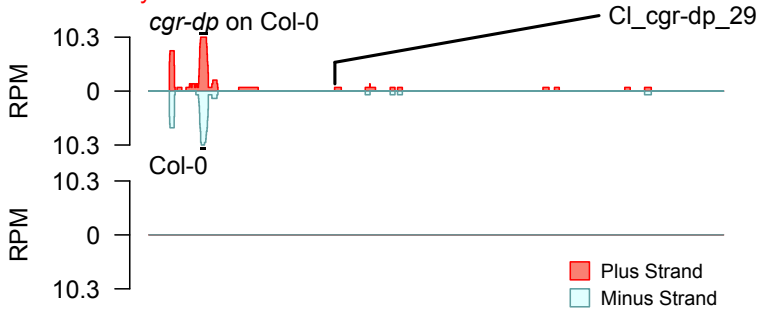

Diff. Exp. secondary siRNA locus not found

**5' read ends (NanoPARE)**

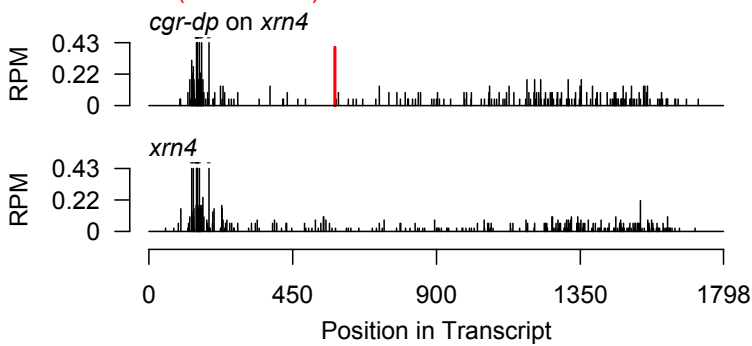

**Allenscore:** 3.5

**Target Interaction:**

5'- AGAGAGGUGGAGAUUCUUGA AT3G14280.1  
| | | | : | | | | : | | | | | | | | | |  
3'- GCUCUUCACCUUUAGGAACU CI\_ccm\_1979

**Target Site:** 470

**Superfamily:** SupFam\_20

**miRNAin ccm:** Yes

**Published name:** Not published

**Confirmed Targeting**

2nd-siRNA NanoPARE

|                 |                 |
|-----------------|-----------------|
| <i>ccm</i>      | <i>ccm</i>      |
| <i>cpe-2015</i> | <i>cpe-2015</i> |
| <i>cpe-2017</i> |                 |
| <i>cgr-dp</i>   | <i>cgr-dp</i>   |
| <i>cgr-pm</i>   |                 |
| <i>cgr-mass</i> |                 |
| <i>cin</i>      | <i>cin</i>      |

## LL-diaminopimelate\_aminotransferase

AT3G14280 - CI\_ccm\_1979

**Secondary siRNAs**

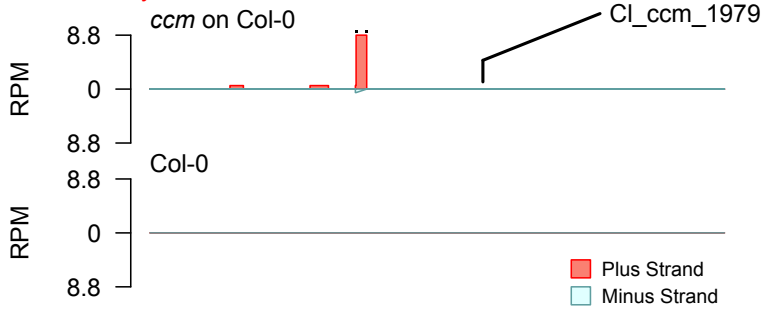

Diff. Exp. secondary siRNA locus not found

**5' read ends (NanoPARE)**

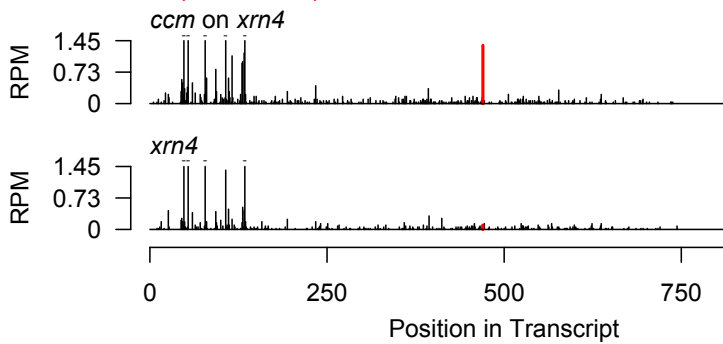



**Allenscore:** 4.5

**Target Interaction:**

5'- UCCAAACCGACACACACGGCAA AT2G36570.1  
          |||||:|||||           |||  
3'- AGGUUUGGUUGUGUGUGG - GUU CI\_cgr-pm\_525

**Target Site:** 408

**Superfamily:** SupFam\_161

**miRNAin ccm:** N/A

**Published name:** N/A

**Confirmed Targeting**

2nd-siRNA    NanoPARE

|                      |                 |
|----------------------|-----------------|
| <i>ccm</i>           | <i>ccm</i>      |
| <i>cpe-2015</i>      | <i>cpe-2015</i> |
| <i>cpe-2017</i>      |                 |
| <i>cgr-dp</i>        | <i>cgr-dp</i>   |
| <b><i>cgr-pm</i></b> |                 |
| <i>cgr-mass</i>      |                 |
| <i>cin</i>           | <i>cin</i>      |

**PXC1**

AT2G36570 - CI\_cgr-pm\_525

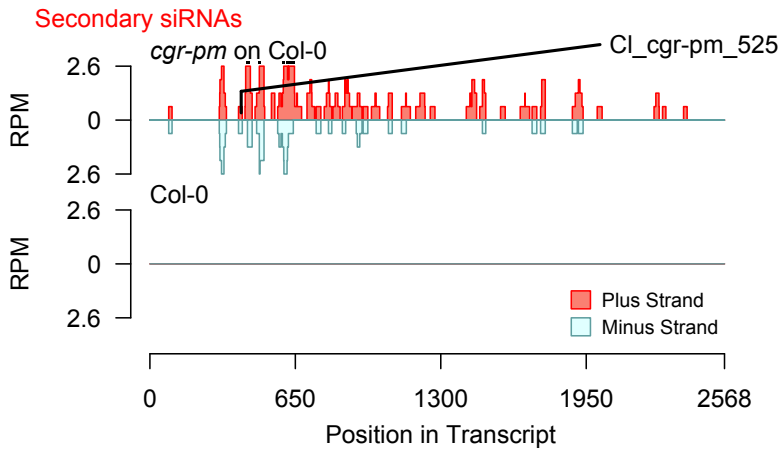

Degradome hits not found for sRNA

2nd siRNAs: Phase diagram

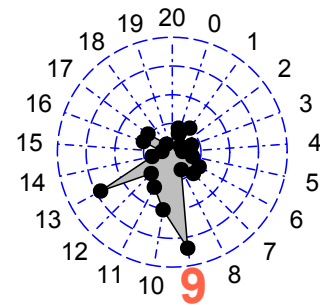

2nd siRNAs: Size distribution

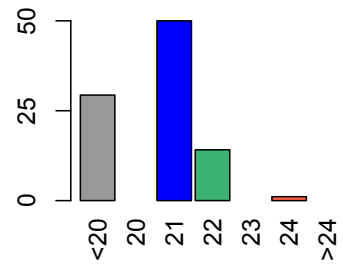

**Allenscore:** 4.5

**Target Interaction:**

5'- GCAGGGCAGACAUCUGAGAGGA AT3G06380.1  
          |||          :|          :|          |||  
3'- AGUCCCGUUUGUAAGCUCUCCU CI\_cgr-dp\_8594

**Target Site:** 1320

**Superfamily:** SupFam\_14

**miRNAin ccm:** N/A

**Published name:** N/A

**Confirmed Targeting**

2nd-siRNA    NanoPARE

|                 |                 |
|-----------------|-----------------|
| <i>ccm</i>      | <i>ccm</i>      |
| <i>cpe-2015</i> | <i>cpe-2015</i> |
| <i>cpe-2017</i> |                 |
| <i>cgr-dp</i>   | <i>cgr-dp</i>   |
| <i>cgr-pm</i>   |                 |
| <i>cgr-mass</i> |                 |
| <i>cin</i>      | <i>cin</i>      |

**TLP9**

AT3G06380 - CI\_cgr-dp\_8594

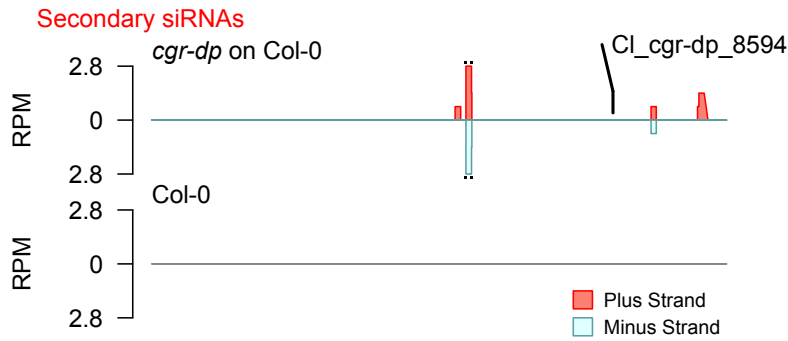

Diff. Exp. secondary siRNA locus not found

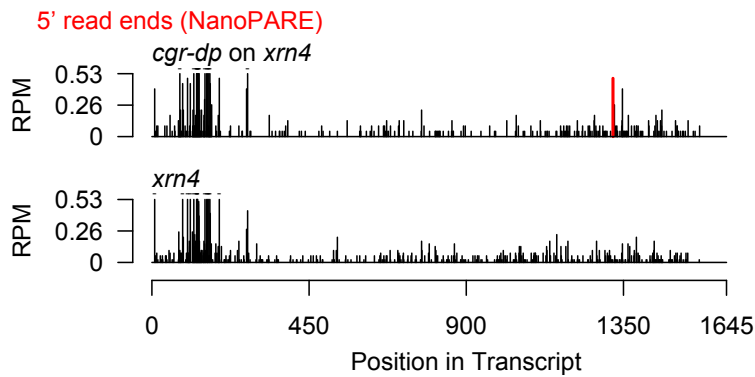

**Allenscore:** 5

**Target Interaction:**

5'- UGGCUCUUAACUUCUCAGUGU AT5G65430.1  
| : | | | | : | | | | | | | | | | | |  
3'- AUCGUGAGUUGAAGAGUCAGU CI\_cpe-2015\_129

**Target Site:** 885

**Superfamily:** SupFam\_24

**miRNAin ccm:** Yes

**Published name:** N/A

**Confirmed Targeting**

2nd-siRNA NanoPARE

| 2nd-siRNA       | NanoPARE        |
|-----------------|-----------------|
| <i>ccm</i>      | <i>ccm</i>      |
| <i>cpe-2015</i> | <i>cpe-2015</i> |
| <i>cpe-2017</i> |                 |
| <i>cgr-dp</i>   | <i>cgr-dp</i>   |
| <i>cgr-pm</i>   |                 |
| <i>cgr-mass</i> |                 |
| <i>cin</i>      | <i>cin</i>      |

**GRF8**

AT5G65430 - CI\_cpe-2015\_129

**Secondary siRNAs**

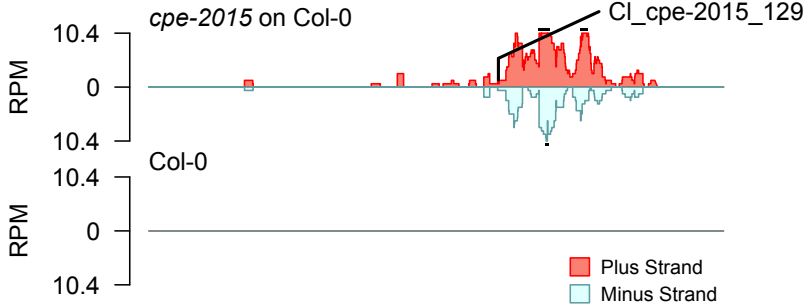

Diff. Exp. secondary siRNA locus not found

**5' read ends (NanoPARE)**

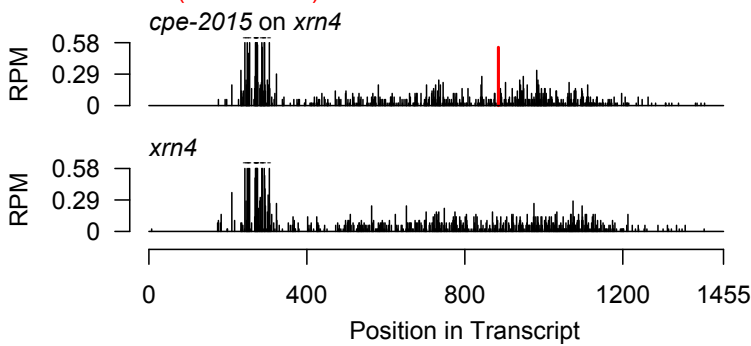



**Allenscore:** 4.5

**Target Interaction:**

5'- GAGGACUUCAUUACCUUCACA AT5G24010.1  
: ||||| ||||| ||||| ||||| |||||  
3'- UUCCUGAAGAUUAUGGAAGUGU CI\_cgr-dp\_14631

**Target Site:** 1954

**Superfamily:** SupFam\_49

**miRNAin ccm:** Yes

**Published name:** N/A

**Confirmed Targeting**

2nd-siRNA NanoPARE

|                 |                 |
|-----------------|-----------------|
| <i>ccm</i>      | <i>ccm</i>      |
| <i>cpe-2015</i> | <i>cpe-2015</i> |
| <i>cpe-2017</i> |                 |
| <i>cgr-dp</i>   | <i>cgr-dp</i>   |
| <i>cgr-pm</i>   |                 |
| <i>cgr-mass</i> |                 |
| <i>cin</i>      | <i>cin</i>      |

## Protein\_kinase\_superfamily\_protein

AT5G24010 - CI\_cgr-dp\_14631

### Secondary siRNAs

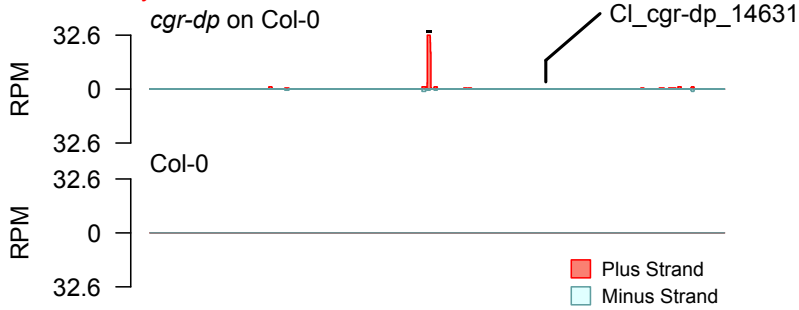

Diff. Exp. secondary siRNA locus not found

### 5' read ends (NanoPARE)

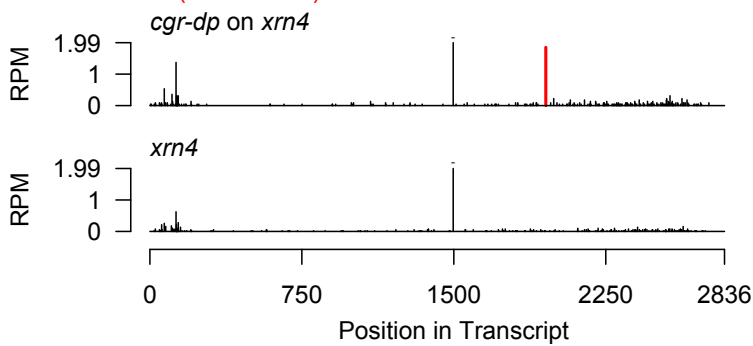

**Allenscore:** 4.5

**Target Interaction:**

5'- CUGGUGUGCAAGUCAUGGUACG AT3G62980.1  
||| | | : | | | : | | | | | | | | : |  
3'- GAGCAGAUGUUUAGUACCAUGU CI\_ccm\_2

**Target Site:** 555

**Superfamily:** SupFam\_27

**miRNAin ccm:** Yes

**Published name:** ccm-MIR12497a\*

**Confirmed Targeting**

2nd-siRNA NanoPARE

|                 |                 |
|-----------------|-----------------|
| <i>ccm</i>      | <i>ccm</i>      |
| <i>cpe-2015</i> | <i>cpe-2015</i> |
| <i>cpe-2017</i> |                 |
| <i>cgr-dp</i>   | <i>cgr-dp</i>   |
| <i>cgr-pm</i>   |                 |
| <i>cgr-mass</i> |                 |
| <i>cin</i>      | <i>cin</i>      |

**TIR1**

AT3G62980 - CI\_ccm\_2

**Secondary siRNAs**

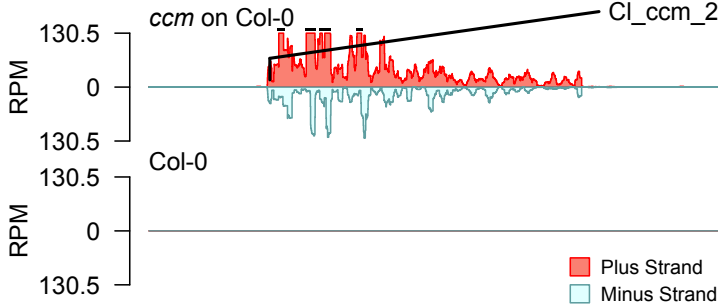

**5' read ends (NanoPARE)**

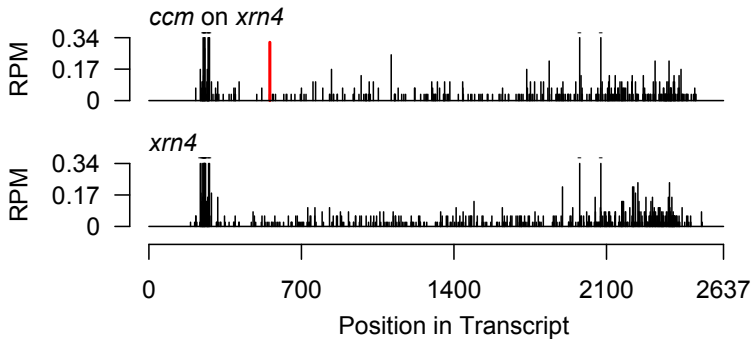

**2nd siRNAs: Phase diagram**

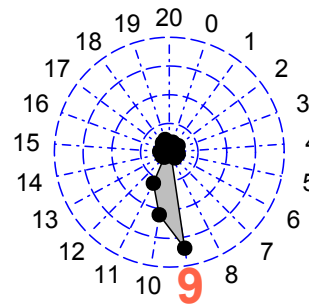

**2nd siRNAs: Size distribution**

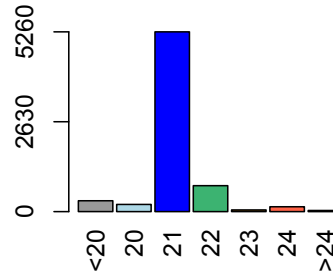

**Allenscore:** 2.5

**Target Interaction:**

5'- CUGGUGUGCAAGUCAUGGUACG AT3G62980.1  
          | : | | | | | | | | | | | | | | | :  
3'- AAUCACACGUUCAGUACCAUGU CI\_ccm\_438

**Target Site:** 555

**Superfamily:** SupFam\_27

**miRNAin ccm:** Yes

**Published name:** Not published

**Confirmed Targeting**

2nd-siRNA    NanoPARE

|                 |                 |
|-----------------|-----------------|
| <i>ccm</i>      | <i>ccm</i>      |
| <i>cpe-2015</i> | <i>cpe-2015</i> |
| <i>cpe-2017</i> |                 |
| <i>cgr-dp</i>   | <i>cgr-dp</i>   |
| <i>cgr-pm</i>   |                 |
| <i>cgr-mass</i> |                 |
| <i>cin</i>      | <i>cin</i>      |

**TIR1**

AT3G62980 - CI\_ccm\_438

**Secondary siRNAs**

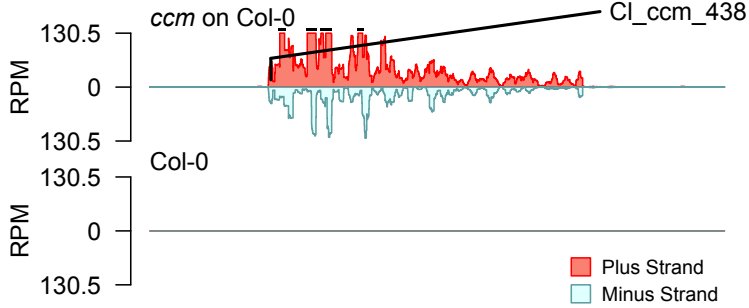

**5' read ends (NanoPARE)**

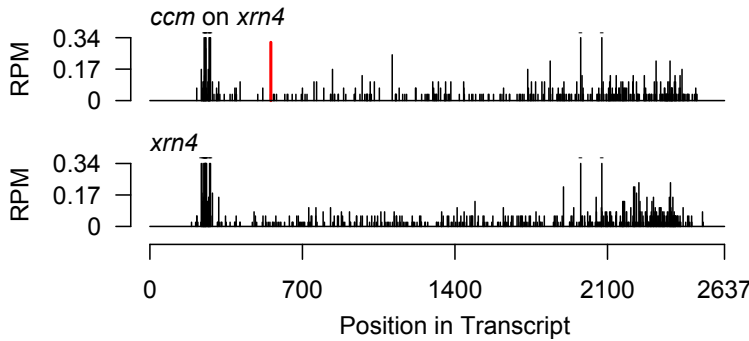

**2nd siRNAs: Phase diagram**

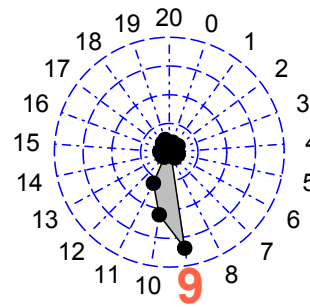

**2nd siRNAs: Size distribution**

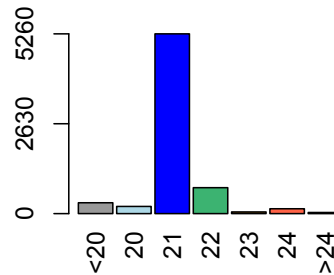

**Allenscore:** 3.5

**Target Interaction:**

5'- CUGGUGUGCAAGUCAUGGUACG AT3G62980.1  
          | | | | | : | | | | | : | | | | | : | | | | | :  
3'- AACCAUACGUUUAGUACCAUGU CI\_ccm\_614

**Target Site:** 555

**Superfamily:** SupFam\_27

**miRNAin ccm:** Yes

**Published name:** ccm-MIR12497b

**Confirmed Targeting**

2nd-siRNA NanoPARE

|                 |                 |
|-----------------|-----------------|
| <i>ccm</i>      | <i>ccm</i>      |
| <i>cpe-2015</i> | <i>cpe-2015</i> |
| <i>cpe-2017</i> |                 |
| <i>cgr-dp</i>   | <i>cgr-dp</i>   |
| <i>cgr-pm</i>   |                 |
| <i>cgr-mass</i> |                 |
| <i>cin</i>      | <i>cin</i>      |

**TIR1**

AT3G62980 - CI\_ccm\_614

**Secondary siRNAs**

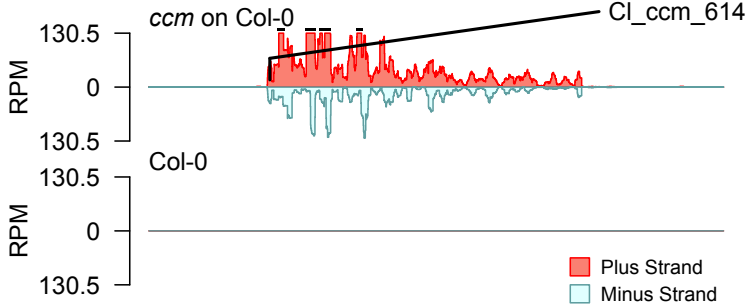

**5' read ends (NanoPARE)**

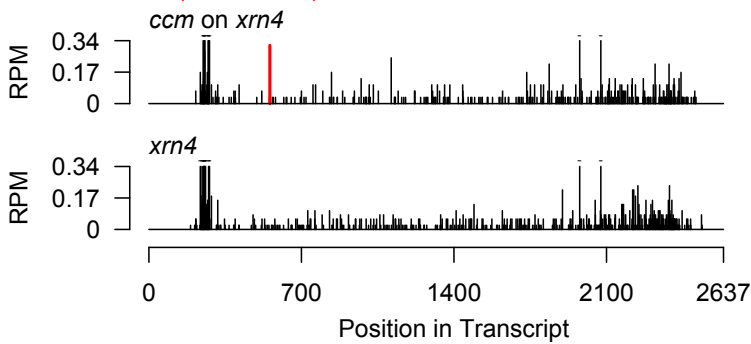

**2nd siRNAs: Phase diagram**



**2nd siRNAs: Size distribution**

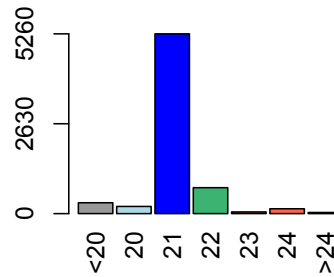

**Allenscore:** 4

**Target Interaction:**

5'- CUGGUGUGCAAGUCAUGGUACG AT3G62980.1  
 ||| | | | | | | | | | : | | | | | | :  
 3'- GACCACACGUUUAGUACCAUAU CI\_ccm\_13108

**Target Site:** 555

**Superfamily:** SupFam\_27

**miRNAin ccm:** Yes

**Published name:** Not published

**Confirmed Targeting**

| 2nd-siRNA | NanoPARE |
|-----------|----------|
| ccm       | ccm      |
| cpe-2015  | cpe-2015 |
| cpe-2017  |          |
| cgr-dp    | cgr-dp   |
| cgr-pm    |          |
| cgr-mass  |          |
| cin       | cin      |

**TIR1**

AT3G62980 - CI\_ccm\_13108

**Secondary siRNAs**

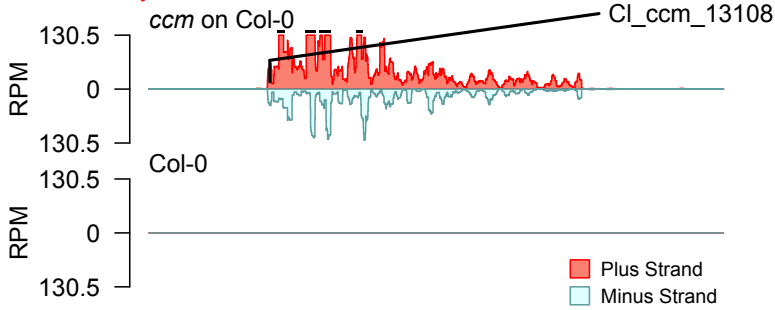

**5' read ends (NanoPARE)**

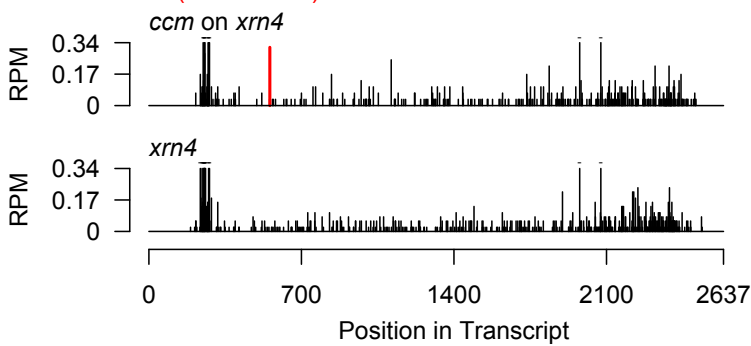

**2nd siRNAs: Phase diagram**

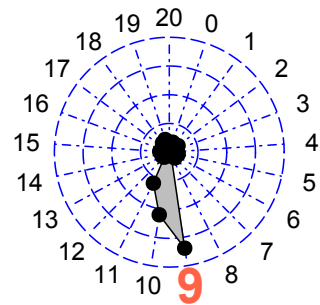

**2nd siRNAs: Size distribution**



Allenscore: 1

**Target Interaction:**

5'- GGUGUGCAAGUCAUGGUACG AT3G62980.1  
||| ||||| :  
3'- CCACACGUUCAGUACCAUGU CI\_ccm\_51538

Target Site: 555

Superfamily: SupFam\_27

miRNAin ccm: Yes

Published name: Not published

**Confirmed Targeting**

2nd-siRNA NanoPARE

|                 |                 |
|-----------------|-----------------|
| <i>ccm</i>      | <i>ccm</i>      |
| <i>cpe-2015</i> | <i>cpe-2015</i> |
| <i>cpe-2017</i> |                 |
| <i>cgr-dp</i>   | <i>cgr-dp</i>   |
| <i>cgr-pm</i>   |                 |
| <i>cgr-mass</i> |                 |
| <i>cin</i>      | <i>cin</i>      |

**TIR1**

AT3G62980 - CI\_ccm\_51538

**Secondary siRNAs**

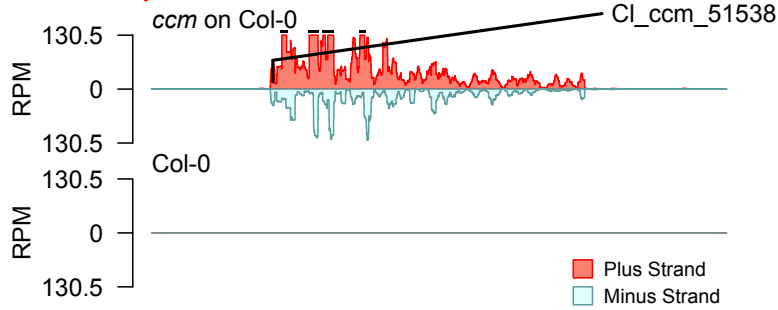

**5' read ends (NanoPARE)**

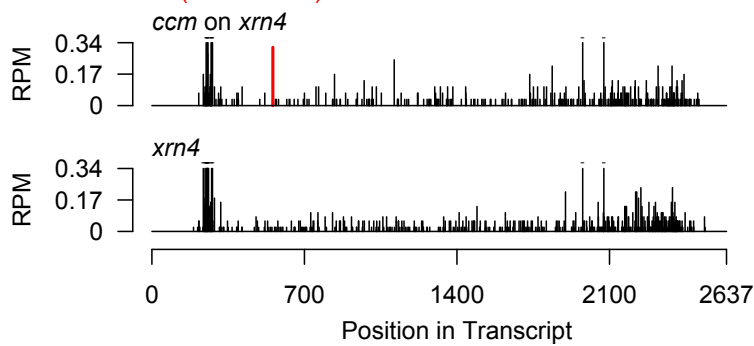

**2nd siRNAs: Phase diagram**

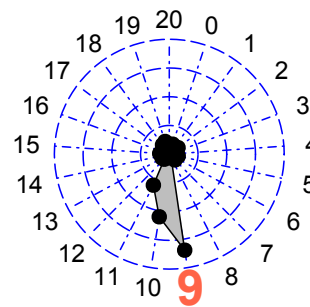

**2nd siRNAs: Size distribution**



**Allenscore:** 4

**Target Interaction:**

```

5'- CUGGUGUGCAAGUCAUGGUACG  AT3G62980.1
   || | | | | | | | | | | | | : | | | | | | | | | |
3'- GAGCAGACGUUUAGUACCAUGU  CI_cpe-2015_7
  
```

**Target Site:** 555

**Superfamily:** SupFam\_27

**miRNAin ccm:** Yes

**Published name:** N/A

**Confirmed Targeting**

| 2nd-siRNA | NanoPARE |
|-----------|----------|
| ccm       | ccm      |
| cpe-2015  | cpe-2015 |
| cpe-2017  |          |
| cgr-dp    | cgr-dp   |
| cgr-pm    |          |
| cgr-mass  |          |
| cin       | cin      |

**TIR1**

AT3G62980 - CI\_cpe-2015\_7

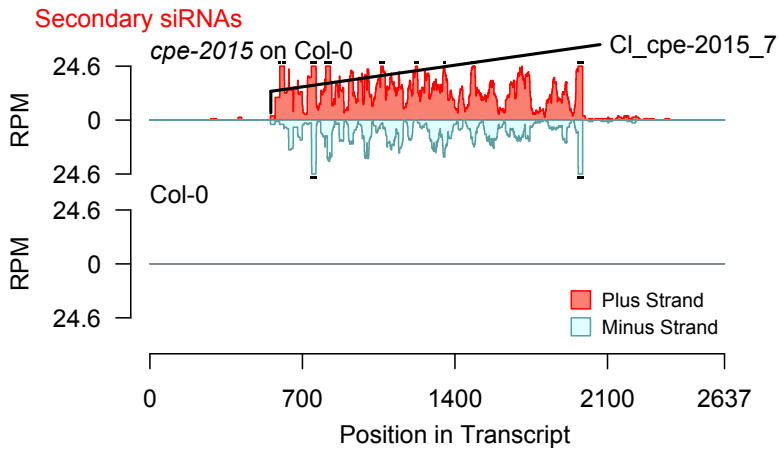

Degradome hits not found for sRNA

**2nd siRNAs: Phase diagram**

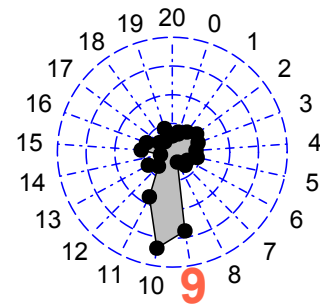

**2nd siRNAs: Size distribution**

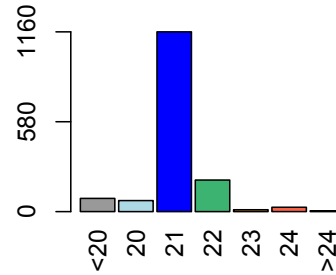

**Allenscore:** 4

**Target Interaction:**

5'- CUGGUGUGCAAGUCAUGGUACG AT3G62980.1  
   | | | | | | | | : | | | | | | :  
3'- GAGCAGACGUUUAGUACCAUGU CI\_cpe-2017\_11

**Target Site:** 555

**Superfamily:** SupFam\_27

**miRNAin ccm:** Yes

**Published name:** N/A

**Confirmed Targeting**

2nd-siRNA NanoPARE

|                 |                 |
|-----------------|-----------------|
| <i>ccm</i>      | <i>ccm</i>      |
| <i>cpe-2015</i> | <i>cpe-2015</i> |
| <i>cpe-2017</i> |                 |
| <i>cgr-dp</i>   | <i>cgr-dp</i>   |
| <i>cgr-pm</i>   |                 |
| <i>cgr-mass</i> |                 |
| <i>cin</i>      | <i>cin</i>      |

**TIR1**

AT3G62980 - CI\_cpe-2017\_11

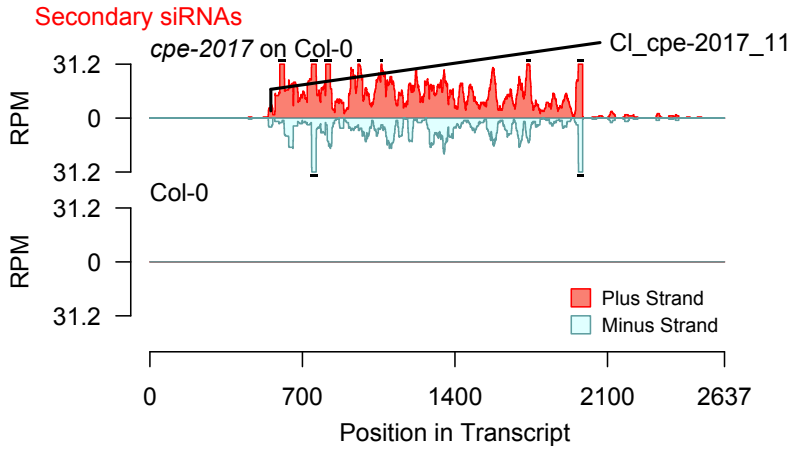

Degradome hits not found for sRNA

**2nd siRNAs: Phase diagram**

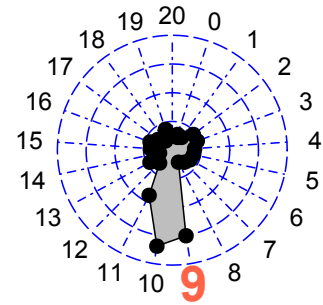

**2nd siRNAs: Size distribution**

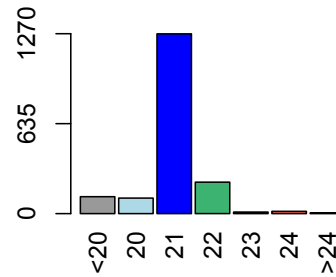



**Allenscore:** 5.5

**Target Interaction:**

```

5'- UGGUGAAAAGUGGAAAUCCUUGU   AT1G20696.1
   : :| | | | | | | | | | | | | |
3'- UUAGCUCUUCACCUUUAGGAACU   CI_ccm_4973
  
```

**Target Site:** 572

**Superfamily:** SupFam\_20

**miRNAin ccm:** Yes

**Published name:** Not published

**Confirmed Targeting**

| 2nd-siRNA       | NanoPARE        |
|-----------------|-----------------|
| <i>ccm</i>      | <i>ccm</i>      |
| <i>cpe-2015</i> | <i>cpe-2015</i> |
| <i>cpe-2017</i> |                 |
| <i>cgr-dp</i>   | <i>cgr-dp</i>   |
| <i>cgr-pm</i>   |                 |
| <i>cgr-mass</i> |                 |
| <i>cin</i>      | <i>cin</i>      |

**HMGB3**

AT1G20696 - CI\_ccm\_4973

**Secondary siRNAs**

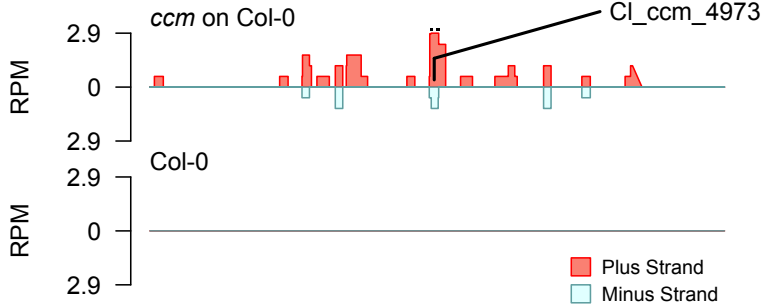

Diff. Exp. secondary siRNA locus not found

**5' read ends (NanoPARE)**

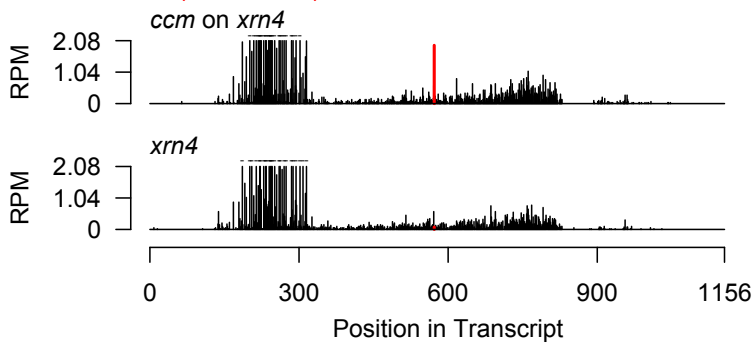



Allenscore: 3

Target Interaction:

5'- UCUGGUCUGCAAGUCAUGGU AT4G03190.1
|| | ||| : |||
3'- UGAGCAGACGUUUAGUACCA CI\_cpe-2015\_526

Target Site: 436

Superfamily: SupFam\_27

miRNAin ccm: Yes

Published name: N/A

Confirmed Targeting

2nd-siRNA NanoPARE

Table with 2 columns (2nd-siRNA, NanoPARE) and rows for ccm, cpe-2015, cpe-2017, cgr-dp, cgr-pm, cgr-mass, cin.

AFB1

AT4G03190 - CI\_cpe-2015\_526

2nd siRNAs: Phase diagram

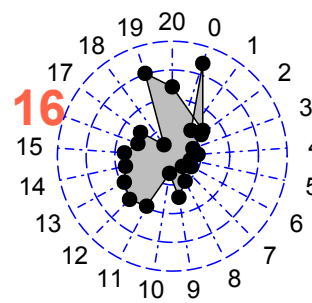

2nd siRNAs: Size distribution

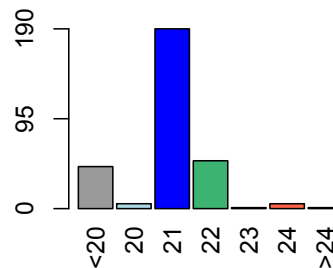

Secondary siRNAs

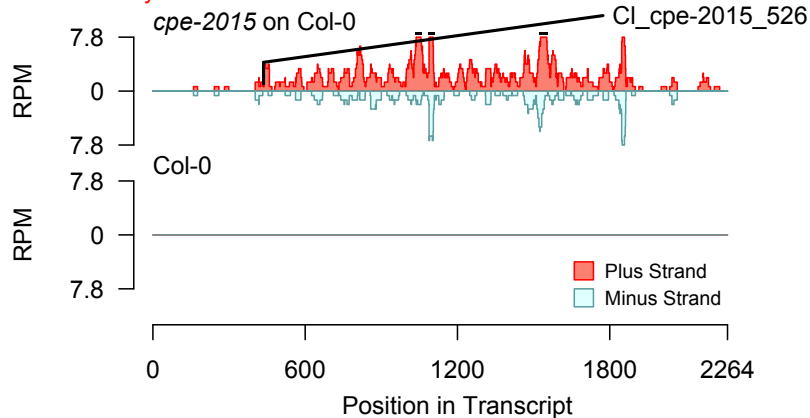

Degradome hits not found for sRNA

**Allenscore:** 3

**Target Interaction:**

```

5'- UCUGGUCUGCAAGUCAUGGU AT4G03190.1
    ||| ||| | ||| | | | | | : | | | | | |
3'- UGAGCAGACGUUUAGUACCA CI_cpe-2017_486
    
```

**Target Site:** 436

**Superfamily:** SupFam\_27

**miRNAin ccm:** Yes

**Published name:** N/A

**Confirmed Targeting**

2nd-siRNA NanoPARE

|                 |                 |
|-----------------|-----------------|
| <i>ccm</i>      | <i>ccm</i>      |
| <i>cpe-2015</i> | <i>cpe-2015</i> |
| <i>cpe-2017</i> |                 |
| <i>cgr-dp</i>   | <i>cgr-dp</i>   |
| <i>cgr-pm</i>   |                 |
| <i>cgr-mass</i> |                 |
| <i>cin</i>      | <i>cin</i>      |

**AFB1**

AT4G03190 - CI\_cpe-2017\_486

**Secondary siRNAs**

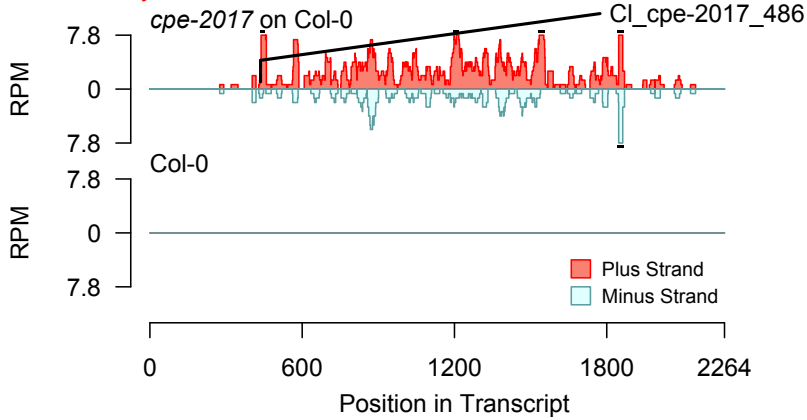

**2nd siRNAs: Phase diagram**

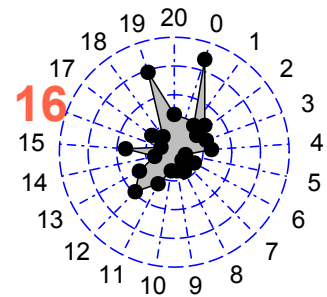

**2nd siRNAs: Size distribution**

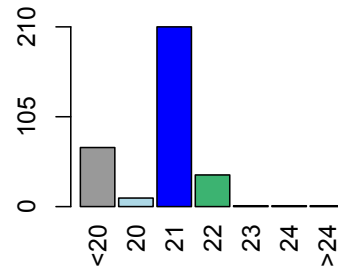

Degradome hits not found for sRNA

**Allenscore:** 5

**Target Interaction:**

5'- UUCUCUGGUCUGCAAGUCAUGG AT4G03190.1  
 ||| ||| ||| ||| ||| : ||| |||  
 3'- UUAAGAGCAGACGUUUAGUACC CI\_cpe-2017\_29015

**Target Site:** 435

**Superfamily:** SupFam\_27

**miRNAin ccm:** Yes

**Published name:** N/A

**Confirmed Targeting**

2nd-siRNA NanoPARE

|          |          |
|----------|----------|
| ccm      | ccm      |
| cpe-2015 | cpe-2015 |
| cpe-2017 |          |
| cgr-dp   | cgr-dp   |
| cgr-pm   |          |
| cgr-mass |          |
| cin      | cin      |

**AFB1**

AT4G03190 - CI\_cpe-2017\_29015

**Secondary siRNAs**

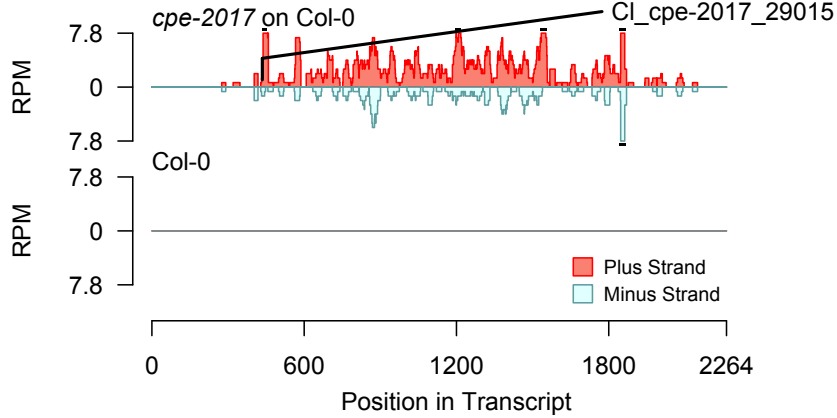

Degradome hits not found for sRNA

**2nd siRNAs: Phase diagram**

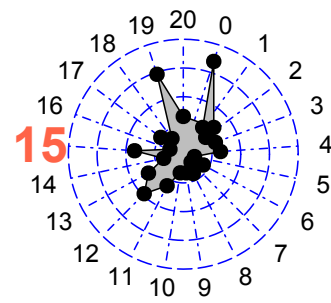

**2nd siRNAs: Size distribution**

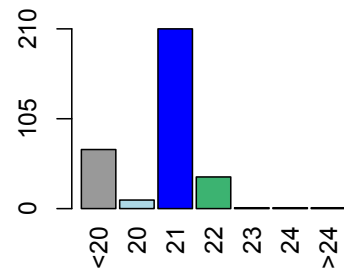

**Allenscore:** 2

**Target Interaction:**

5'- CUUGUAUGCAAUAUCAUGGUACA AT3G26810.1  
      | : | |   | : | | | | | | | | | | | | |  
3'- GAGCAGAUGUUUAGUACCAUGU CI\_ccm\_2

**Target Site:** 781

**Superfamily:** SupFam\_27

**miRNAin ccm:** Yes

**Published name:** ccm-MIR12497a\*

**Confirmed Targeting**

| 2nd-siRNA | NanoPARE |
|-----------|----------|
| ccm       | ccm      |
| cpe-2015  | cpe-2015 |
| cpe-2017  |          |
| cgr-dp    | cgr-dp   |
| cgr-pm    |          |
| cgr-mass  |          |
| cin       | cin      |

**AFB2**

AT3G26810 - CI\_ccm\_2

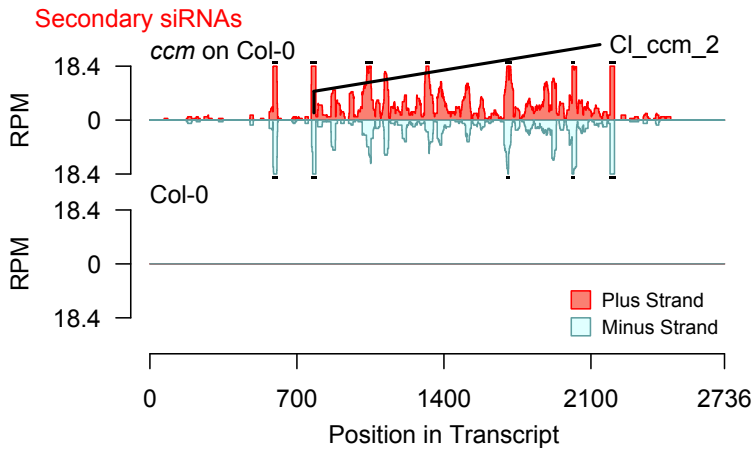

2nd siRNAs: Phase diagram

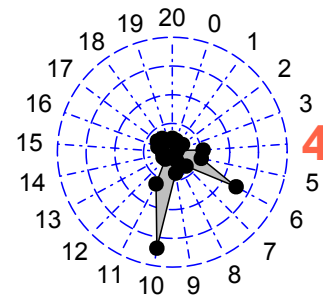

2nd siRNAs: Size distribution

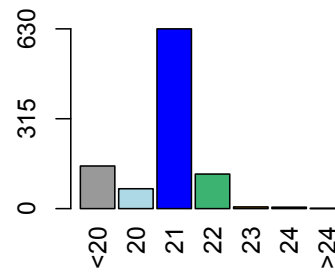

Degradome hits not found for sRNA

**Allenscore:** 3

**Target Interaction:**

```
5'- CUUGUAUGCAAUUAUGGUACA AT3G26810.1
  | | | | | | | | | | | | | | | | | | | |
3'- AACCAUACGUUUAGUACCAUGU CI_ccm_614
```

**Target Site:** 781

**Superfamily:** SupFam\_27

**miRNAin ccm:** Yes

**Published name:** ccm-MIR12497b

**Confirmed Targeting**

*2nd-siRNA*    *NanoPARE*

|                 |                 |
|-----------------|-----------------|
| <i>ccm</i>      | <i>ccm</i>      |
| <i>cpe-2015</i> | <i>cpe-2015</i> |
| <i>cpe-2017</i> |                 |
| <i>cgr-dp</i>   | <i>cgr-dp</i>   |
| <i>cgr-pm</i>   |                 |
| <i>cgr-mass</i> |                 |
| <i>cin</i>      | <i>cin</i>      |

**AFB2**

AT3G26810 - CI\_ccm\_614

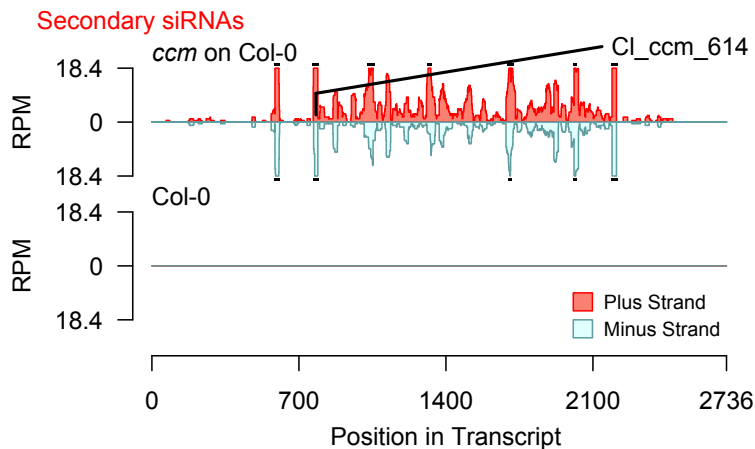

Degradome hits not found for sRNA

**2nd siRNAs: Phase diagram**

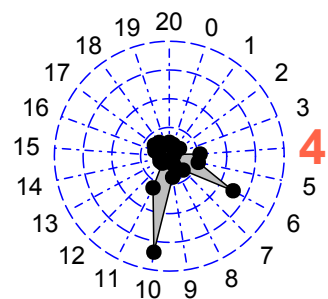

**2nd siRNAs: Size distribution**

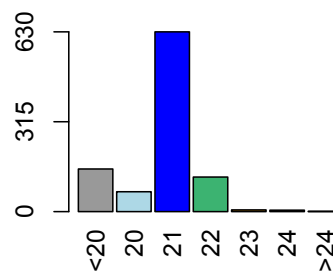

Allenscore: 1.5

Target Interaction:

```

5'- CUUGUAUGCAAUCAUGGUACA  AT3G26810.1
   ||:| | | | | | | | | | | |
3'- GAGCAGACGUUUAGUACCAUGU  CI_cpe-2015_7

```

Target Site: 781

Superfamily: SupFam\_27

miRNAin ccm: Yes

Published name: N/A

Confirmed Targeting

2nd-siRNA NanoPARE

|          |          |
|----------|----------|
| ccm      | ccm      |
| cpe-2015 | cpe-2015 |
| cpe-2017 |          |
| cgr-dp   | cgr-dp   |
| cgr-pm   |          |
| cgr-mass |          |
| cin      | cin      |

### AFB2

AT3G26810 - CI\_cpe-2015\_7

### 2nd siRNAs: Phase diagram

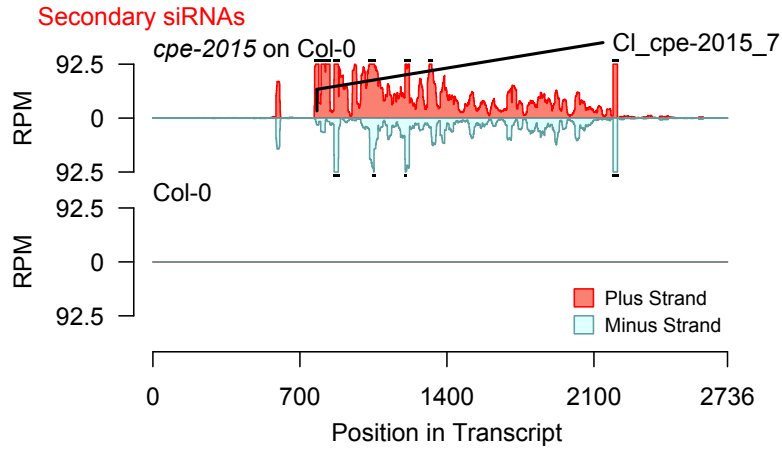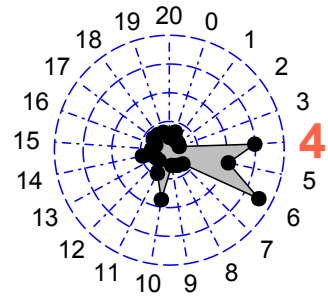

### 2nd siRNAs: Size distribution

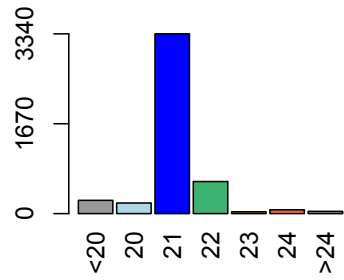

Degradome hits not found for sRNA











**Allenscore:** 4

**Target Interaction:**

5'- CUGGUUACUUAGACCCAGAGUA AT4G00330.1  
          |||||  
3'- AACCAAUGAAUCUAGGUCUCAC CI\_cpe-2015\_439

**Target Site:** 1015

**Superfamily:** SupFam\_257

**miRNAin ccm:** N/A

**Published name:** N/A

**Confirmed Targeting**

2nd-siRNA    NanoPARE

|                 |                 |
|-----------------|-----------------|
| <i>ccm</i>      | <i>ccm</i>      |
| <i>cpe-2015</i> | <i>cpe-2015</i> |
| <i>cpe-2017</i> |                 |
| <i>cgr-dp</i>   | <i>cgr-dp</i>   |
| <i>cgr-pm</i>   |                 |
| <i>cgr-mass</i> |                 |
| <i>cin</i>      | <i>cin</i>      |

**CRCK2**

AT4G00330 - CI\_cpe-2015\_439

**Secondary siRNAs**

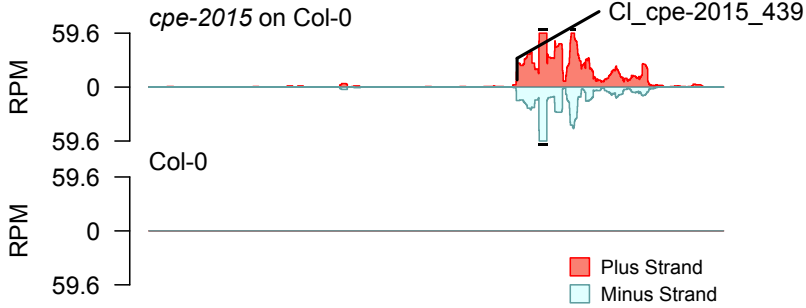

**5' read ends (NanoPARE)**

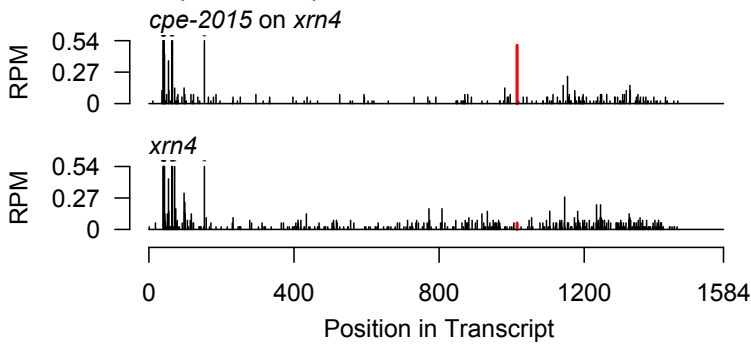

**2nd siRNAs: Phase diagram**

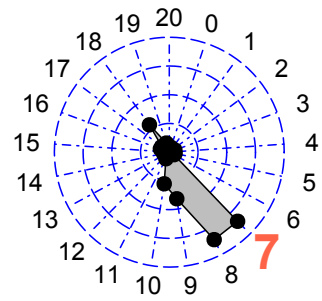

**2nd siRNAs: Size distribution**

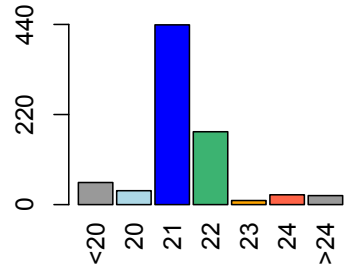

**Allenscore:** 3.5

**Target Interaction:**

5'- GGUUACUUAGACCCAGAGUA AT4G00330.1  
: ||||| ||||| ||||| |||||  
3'- UCAAUGAAUCUAGGUCUCAC CI\_cpe-2015\_45087

**Target Site:** 1015

**Superfamily:** SupFam\_257

**miRNAin ccm:** N/A

**Published name:** N/A

**Confirmed Targeting**

2nd-siRNA NanoPARE

|                 |                 |
|-----------------|-----------------|
| <i>ccm</i>      | <i>ccm</i>      |
| <i>cpe-2015</i> | <i>cpe-2015</i> |
| <i>cpe-2017</i> |                 |
| <i>cgr-dp</i>   | <i>cgr-dp</i>   |
| <i>cgr-pm</i>   |                 |
| <i>cgr-mass</i> |                 |
| <i>cin</i>      | <i>cin</i>      |

**CRCK2**

AT4G00330 - CI\_cpe-2015\_45087

**Secondary siRNAs**

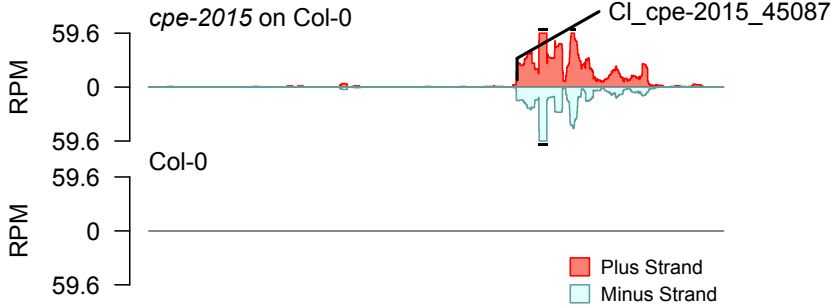

**5' read ends (NanoPARE)**

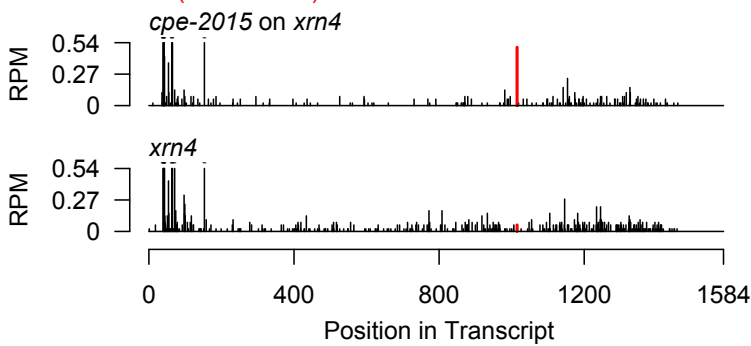

**2nd siRNAs: Phase diagram**

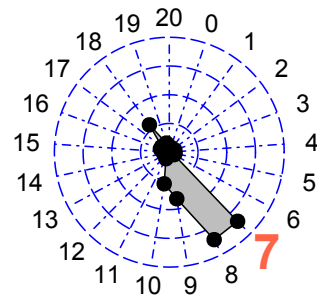

**2nd siRNAs: Size distribution**

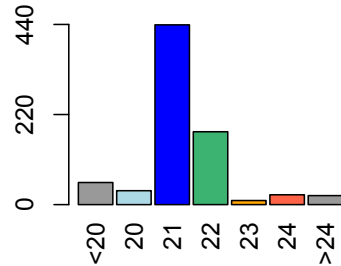

**Allenscore:** 4

**Target Interaction:**

5'- CUGGUUACUUAGACCCAGAGUA AT4G00330.1  
          |                                                          |  
3'- AACCAAUGAAUCUAGGUCUCAC CI\_cpe-2017\_503

**Target Site:** 1015

**Superfamily:** SupFam\_257

**miRNAin ccm:** N/A

**Published name:** N/A

**Confirmed Targeting**

2nd-siRNA NanoPARE

|                 |                 |
|-----------------|-----------------|
| <i>ccm</i>      | <i>ccm</i>      |
| <i>cpe-2015</i> | <i>cpe-2015</i> |
| <i>cpe-2017</i> |                 |
| <i>cgr-dp</i>   | <i>cgr-dp</i>   |
| <i>cgr-pm</i>   |                 |
| <i>cgr-mass</i> |                 |
| <i>cin</i>      | <i>cin</i>      |

### CRCK2

AT4G00330 - CI\_cpe-2017\_503

**Secondary siRNAs**

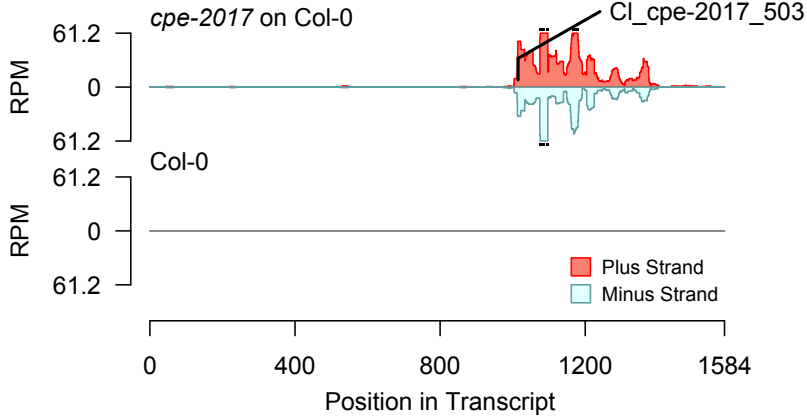

Degradome hits not found for sRNA

**2nd siRNAs: Phase diagram**

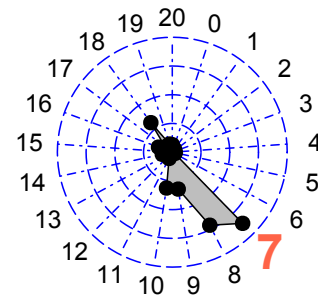

**2nd siRNAs: Size distribution**

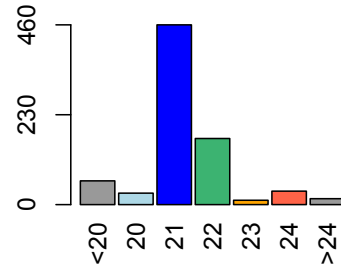







**Allenscore:** 5.5

**Target Interaction:**

5'- GGUUACUUAGAUCAGAUUA AT3G51990.1  
: |||||  
3'- UCAAUGAAUCUAGGUCUCAC CI\_cpe-2015\_45087

**Target Site:** 921

**Superfamily:** SupFam\_257

**miRNAin ccm:** N/A

**Published name:** N/A

**Confirmed Targeting**

2nd-siRNA NanoPARE

|                 |                 |
|-----------------|-----------------|
| <i>ccm</i>      | <i>ccm</i>      |
| <i>cpe-2015</i> | <i>cpe-2015</i> |
| <i>cpe-2017</i> |                 |
| <i>cgr-dp</i>   | <i>cgr-dp</i>   |
| <i>cgr-pm</i>   |                 |
| <i>cgr-mass</i> |                 |
| <i>cin</i>      | <i>cin</i>      |

**Protein\_kinase\_superfamily\_protein**

AT3G51990 - CI\_cpe-2015\_45087

**Secondary siRNAs**

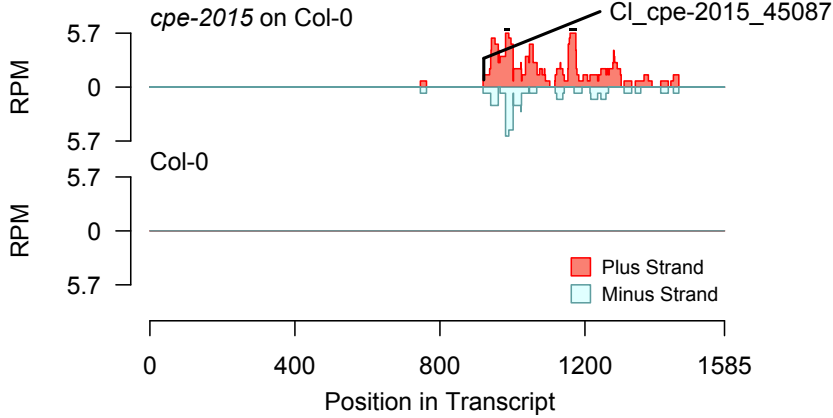

**2nd siRNAs: Phase diagram**

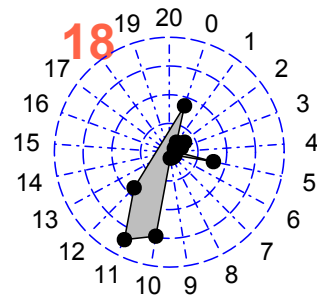

**2nd siRNAs: Size distribution**

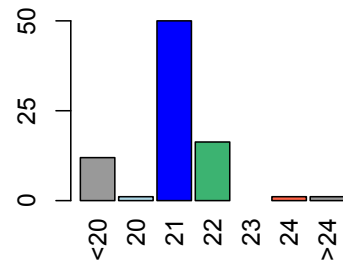

Degradome hits not found for sRNA





**Allenscore:** 3

**Target Interaction:**

5'- GGAAGAAGAUGAGAAGCUUA AT1G63910.1  
          |                          |                          |  
3'- GCUUCUUCUACUUUUCGAGU CI\_cgr-dp\_37384

**Target Site:** 216

**Superfamily:** SupFam\_37

**miRNAin ccm:** N/A

**Published name:** N/A

**Confirmed Targeting**

2nd-siRNA    NanoPARE

|                 |                 |
|-----------------|-----------------|
| <i>ccm</i>      | <i>ccm</i>      |
| <i>cpe-2015</i> | <i>cpe-2015</i> |
| <i>cpe-2017</i> |                 |
| <i>cgr-dp</i>   | <i>cgr-dp</i>   |
| <i>cgr-pm</i>   |                 |
| <i>cgr-mass</i> |                 |
| <i>cin</i>      | <i>cin</i>      |

**AtMYB103**

AT1G63910 - CI\_cgr-dp\_37384

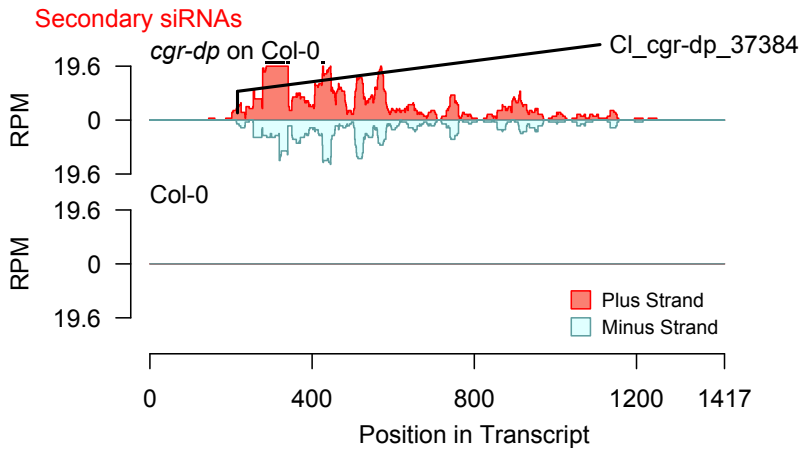

2nd siRNAs: Phase diagram

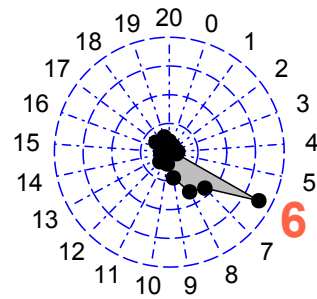

2nd siRNAs: Size distribution

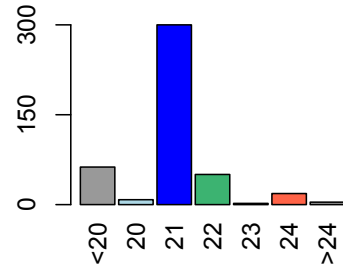

Degradome hits not found for sRNA









Allenscore: 2

Target Interaction:

```

5'- ACCGGAAGAAGAUGAGAAGCUUA  AT1G63910.1
   |||:||||:||||:||||:||||:|
3'- UGGCCUUCUUCUACUUUUCGAGU  CI_cgr-mass_4415
  
```

Target Site: 216

Superfamily: SupFam\_37

miRNAin ccm: N/A

Published name: N/A

Confirmed Targeting

2nd-siRNA NanoPARE

|          |          |
|----------|----------|
| ccm      | ccm      |
| cpe-2015 | cpe-2015 |
| cpe-2017 |          |
| cgr-dp   | cgr-dp   |
| cgr-pm   |          |
| cgr-mass |          |
| cin      | cin      |

# AtMYB103

AT1G63910 - CI\_cgr-mass\_4415

2nd siRNAs: Phase diagram

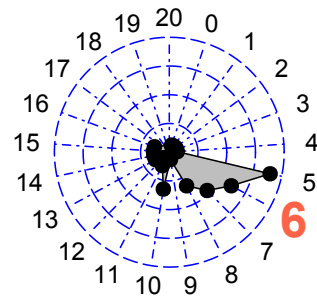

Secondary siRNAs

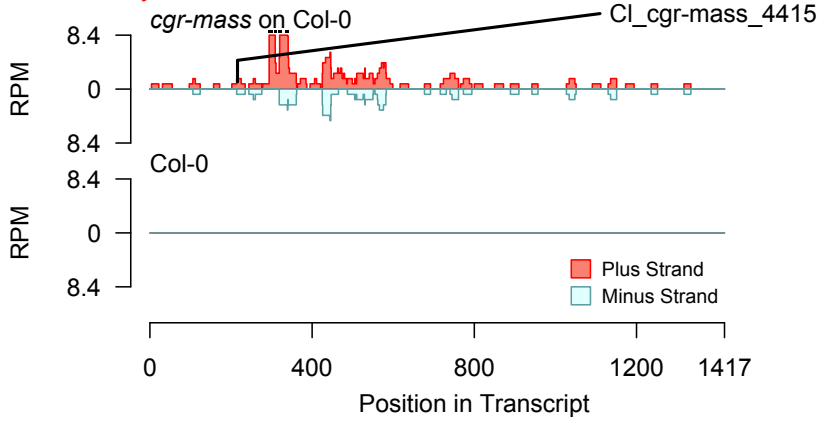

2nd siRNAs: Size distribution

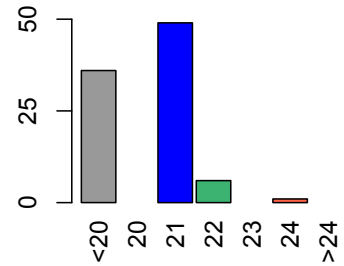

Degradome hits not found for sRNA



**Allenscore:** 6

**Target Interaction:**

```
5'- UCGUCAGCUCAAUACUUAUGGU  AT1G46264.1  
   | | | | | | | | | | | | | | |  
3'- CUCUGUCGAGUUAUGUAUACCU  CI_cpe-2017_72
```

**Target Site:** 457

**Superfamily:** SupFam\_116

**miRNAin ccm:** Yes

**Published name:** N/A

**Confirmed Targeting**

*2nd-siRNA*    *NanoPARE*

|                        |                 |
|------------------------|-----------------|
| <b><i>ccm</i></b>      | <i>ccm</i>      |
| <i>cpe-2015</i>        | <i>cpe-2015</i> |
| <b><i>cpe-2017</i></b> |                 |
| <i>cgr-dp</i>          | <i>cgr-dp</i>   |
| <i>cgr-pm</i>          |                 |
| <i>cgr-mass</i>        |                 |
| <i>cin</i>             | <i>cin</i>      |

**HSFB4**

AT1G46264 - CI\_cpe-2017\_72

**Secondary siRNAs**

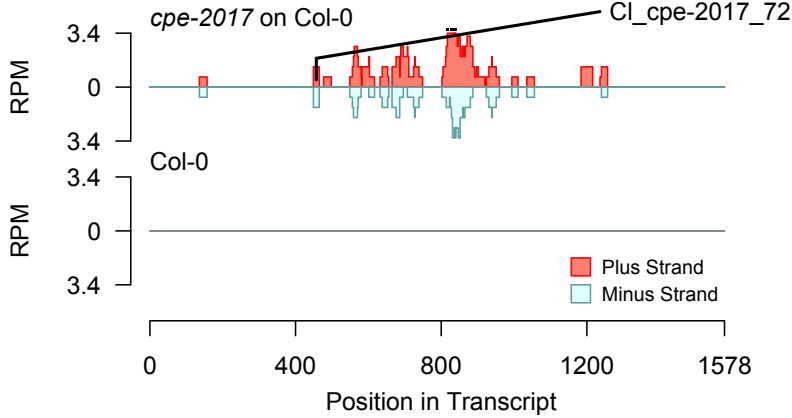

**2nd siRNAs: Phase diagram**

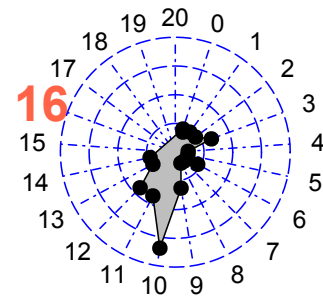

**2nd siRNAs: Size distribution**

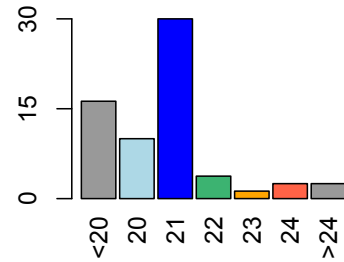

Degradome hits not found for sRNA

**Allenscore:** 5

**Target Interaction:**

5'- UCGUCAGCUCAAUACUUAUGGU AT1G46264.1  
 : : | | | | | | | | | | | | | | | | | |  
 3'- GGUUGUCGAGUUAUGUAUACCU CI\_cpe-2017\_3993

**Target Site:** 457

**Superfamily:** SupFam\_116

**miRNAin ccm:** Yes

**Published name:** N/A

**Confirmed Targeting**

| 2nd-siRNA       | NanoPARE |
|-----------------|----------|
| <b>ccm</b>      | ccm      |
| cpe-2015        | cpe-2015 |
| <b>cpe-2017</b> |          |
| cgr-dp          | cgr-dp   |
| cgr-pm          |          |
| cgr-mass        |          |
| cin             | cin      |

### Hsfb4

AT1G46264 - CI\_cpe-2017\_3993

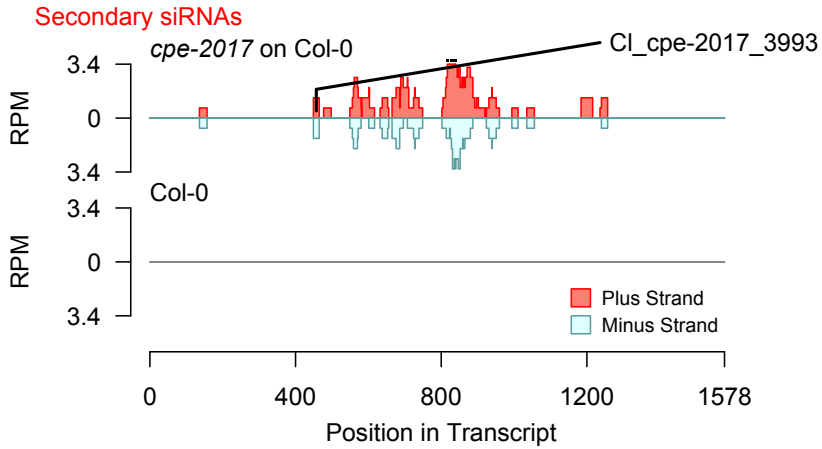

Degradome hits not found for sRNA

**2nd siRNAs: Phase diagram**

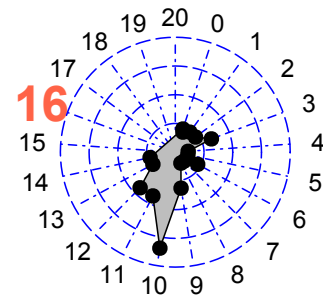

**2nd siRNAs: Size distribution**

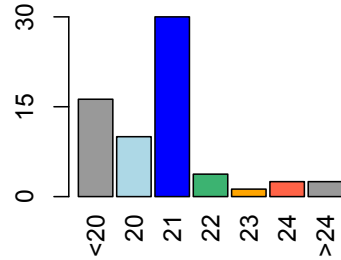

Allescore: 4.5

**Target Interaction:**

```
5'- UACGGUUACAUUGCACCAGAAUA AT5G61480.1
   : | | | | | | | | | | | | | | |
3'- GUCCCAAUGCGACGUGGUCUUAU CI_ccm_818
```

Target Site: 3083

Superfamily: SupFam\_124

miRNAin *ccm*: No

Published name: Not published

**Confirmed Targeting**

| 2nd-siRNA       | NanoPARE        |
|-----------------|-----------------|
| <i>ccm</i>      | <i>ccm</i>      |
| <i>cpe-2015</i> | <i>cpe-2015</i> |
| <i>cpe-2017</i> |                 |
| <i>cgr-dp</i>   | <i>cgr-dp</i>   |
| <i>cgr-pm</i>   |                 |
| <i>cgr-mass</i> |                 |
| <i>cin</i>      | <i>cin</i>      |

**PXY**

AT5G61480 - *CI\_ccm\_818*

**Secondary siRNAs**

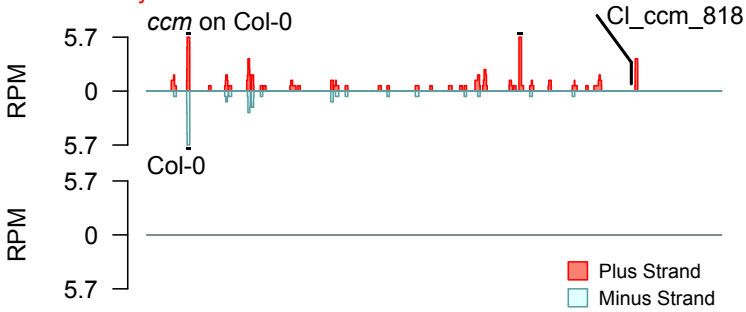

Diff. Exp. secondary siRNA locus not found

**5' read ends (NanoPARE)**

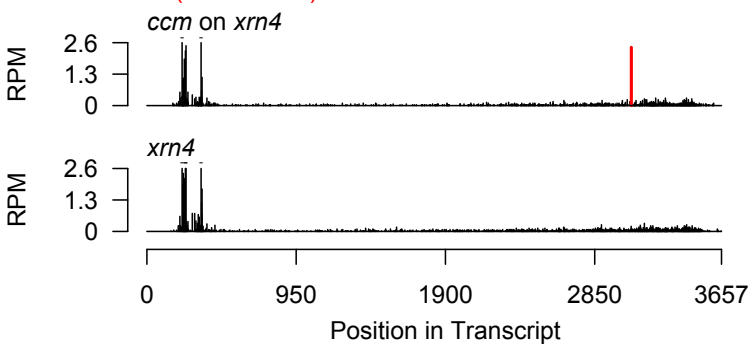

**Allenscore:** 3

**Target Interaction:**

5'- AUGGAUGGUAAGUUUUUAUGUGA AT5G60570.1  
 |||||:|||||:|||||  
 3'- UACCUACCUUUCGAAAUUGCACU CI\_ccm\_670

**Target Site:** 1307

**Superfamily:** SupFam\_281

**miRNAin ccm:** Yes

**Published name:** Not published

**Confirmed Targeting**

*2nd-siRNA*     *NanoPARE*

|                 |                 |
|-----------------|-----------------|
| <i>ccm</i>      | <i>ccm</i>      |
| <i>cpe-2015</i> | <i>cpe-2015</i> |
| <i>cpe-2017</i> |                 |
| <i>cgr-dp</i>   | <i>cgr-dp</i>   |
| <i>cgr-pm</i>   |                 |
| <i>cgr-mass</i> |                 |
| <i>cin</i>      | <i>cin</i>      |

**Galactose\_oxidase\_superfamily\_protein**

AT5G60570 - CI\_ccm\_670

**Secondary siRNAs**

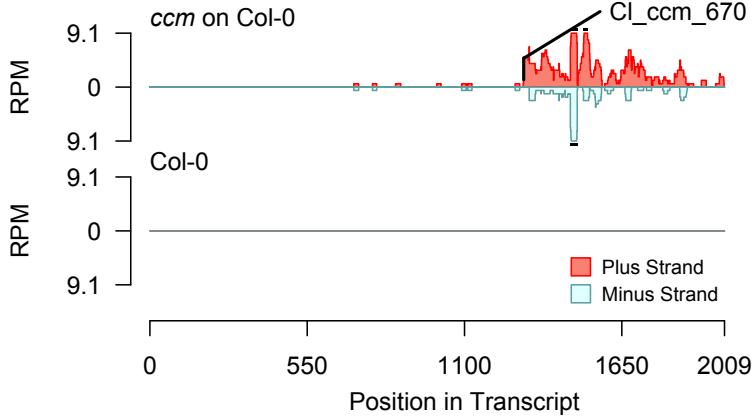

Degradome hits not found for sRNA

**2nd siRNAs: Phase diagram**

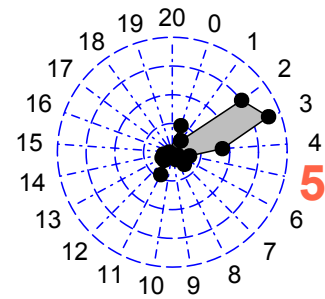

**2nd siRNAs: Size distribution**

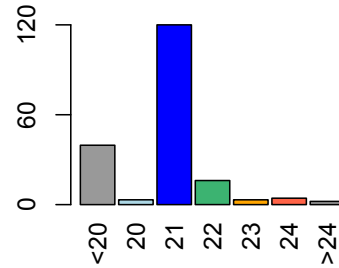

**Allenscore:** 3

**Target Interaction:**

5'- AUGGAUGGUAAGUUUUUAUGUGA AT5G60570.1  
 |||:|||||:|||||:|||||  
 3'- UACCUACCUUUCGAAAUUGCACU CI\_cpe-2015\_316

**Target Site:** 1307

**Superfamily:** SupFam\_281

**miRNAin ccm:** Yes

**Published name:** N/A

**Confirmed Targeting**

2nd-siRNA NanoPARE

|                 |                 |
|-----------------|-----------------|
| <i>ccm</i>      | <i>ccm</i>      |
| <i>cpe-2015</i> | <i>cpe-2015</i> |
| <i>cpe-2017</i> |                 |
| <i>cgr-dp</i>   | <i>cgr-dp</i>   |
| <i>cgr-pm</i>   |                 |
| <i>cgr-mass</i> |                 |
| <i>cin</i>      | <i>cin</i>      |

**Galactose\_oxidase\_superfamily\_protein**

AT5G60570 - CI\_cpe-2015\_316

2nd siRNAs: Phase diagram

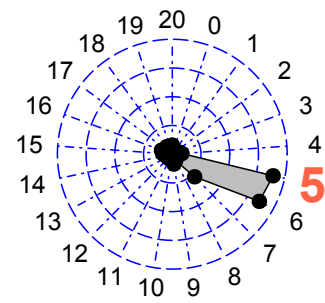

2nd siRNAs: Size distribution

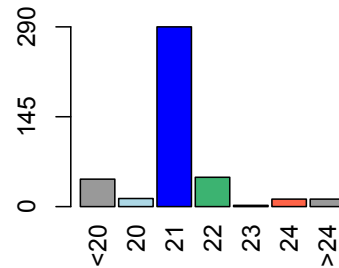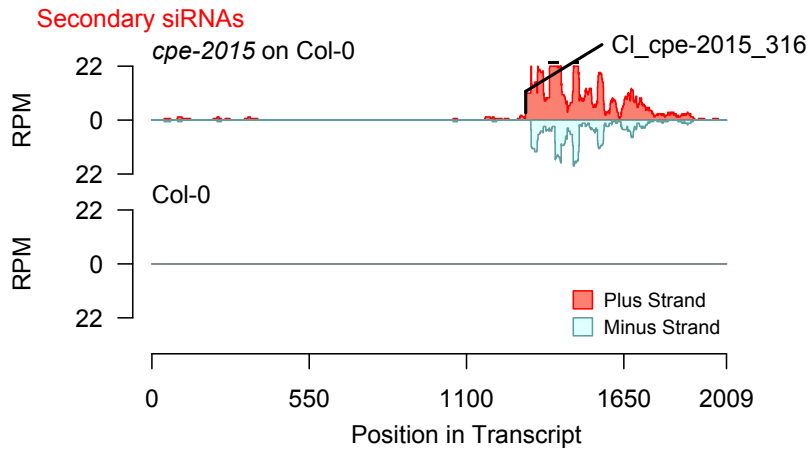

Degradome hits not found for sRNA

Allenscore: 3

**Target Interaction:**

```

5'- AUGGAUGGUAAGUUUUUAUGUGA   AT5G60570.1
   |||:||||| |||:||||:||||
3'- UACCUACCUUUCGAA AUGCACU    CI_cpe-2017_305
  
```

Target Site: 1307

Superfamily: SupFam\_281

miRNAin ccm: Yes

Published name: N/A

**Confirmed Targeting**

2nd-siRNA NanoPARE

| 2nd-siRNA       | NanoPARE        |
|-----------------|-----------------|
| <i>ccm</i>      | <i>ccm</i>      |
| <i>cpe-2015</i> | <i>cpe-2015</i> |
| <i>cpe-2017</i> |                 |
| <i>cgr-dp</i>   | <i>cgr-dp</i>   |
| <i>cgr-pm</i>   |                 |
| <i>cgr-mass</i> |                 |
| <i>cin</i>      | <i>cin</i>      |

**Galactose\_oxidase\_superfamily\_protein**

AT5G60570 - CI\_cpe-2017\_305

Secondary siRNAs

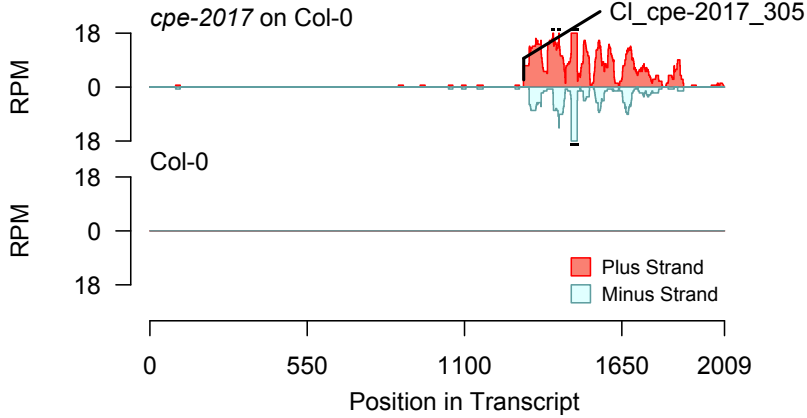

Degradome hits not found for sRNA

2nd siRNAs: Phase diagram

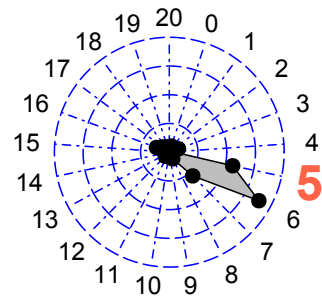

2nd siRNAs: Size distribution

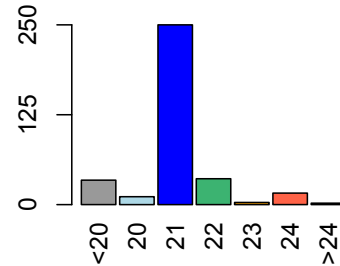



**Allenscore:** 2.5

**Target Interaction:**

5'- GAGGACUUCUAUAUCUUCACC AT1G65800.1  
: ||||| : |||||  
3'- UUCCUGAAGAU AUGGAAGUGU CI\_cgr-dp\_14631

**Target Site:** 2196

**Superfamily:** SupFam\_49

**miRNAin ccm:** Yes

**Published name:** N/A

**Confirmed Targeting**

2nd-siRNA NanoPARE

|                 |                 |
|-----------------|-----------------|
| <i>ccm</i>      | <i>ccm</i>      |
| <i>cpe-2015</i> | <i>cpe-2015</i> |
| <i>cpe-2017</i> |                 |
| <i>cgr-dp</i>   | <i>cgr-dp</i>   |
| <i>cgr-pm</i>   |                 |
| <i>cgr-mass</i> |                 |
| <i>cin</i>      | <i>cin</i>      |

## RK2

AT1G65800 - CI\_cgr-dp\_14631

### Secondary siRNAs

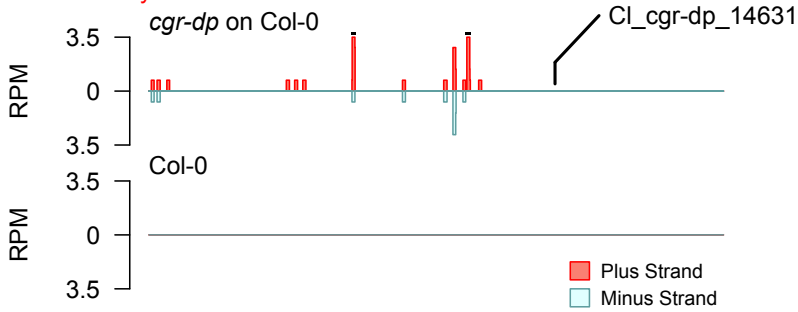

Diff. Exp. secondary siRNA locus not found

### 5' read ends (NanoPARE)

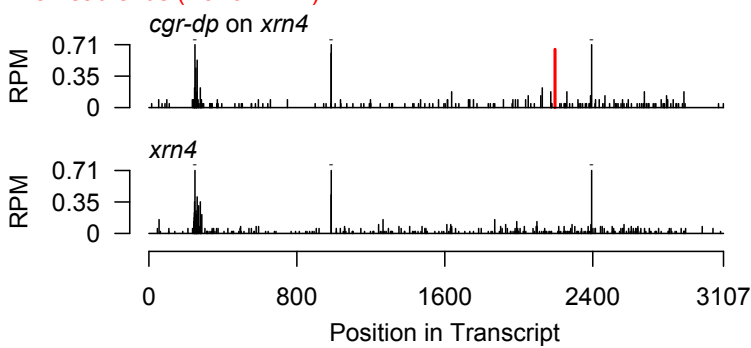

**Allenscore:** 2

**Target Interaction:**

```

5'- GGUUAUUUAGAUCAGAGUA AT3G53840.1
  : |||||: ||||| ||||| |||||
3'- UCAAUGAAUCUAGGUCUCAC CI_cpe-2015_45087
    
```

**Target Site:** 1583

**Superfamily:** SupFam\_257

**miRNAin ccm:** N/A

**Published name:** N/A

**Confirmed Targeting**

2nd-siRNA NanoPARE

| 2nd-siRNA       | NanoPARE        |
|-----------------|-----------------|
| <i>ccm</i>      | <i>ccm</i>      |
| <i>cpe-2015</i> | <i>cpe-2015</i> |
| <i>cpe-2017</i> |                 |
| <i>cgr-dp</i>   | <i>cgr-dp</i>   |
| <i>cgr-pm</i>   |                 |
| <i>cgr-mass</i> |                 |
| <i>cin</i>      | <i>cin</i>      |

### Protein\_kinase\_superfamily\_protein

AT3G53840 - CI\_cpe-2015\_45087

**Secondary siRNAs**

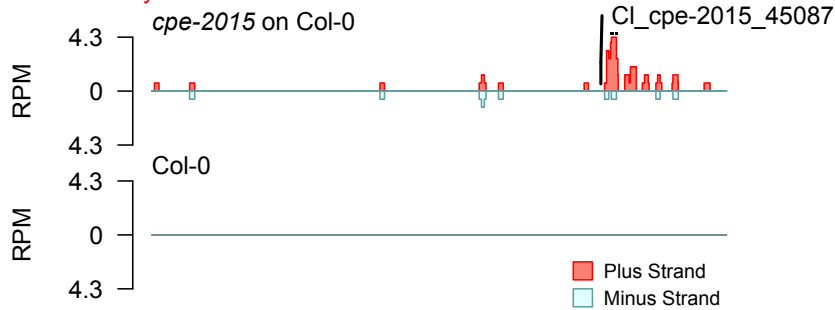

Diff. Exp. secondary siRNA locus not found

**5' read ends (NanoPARE)**

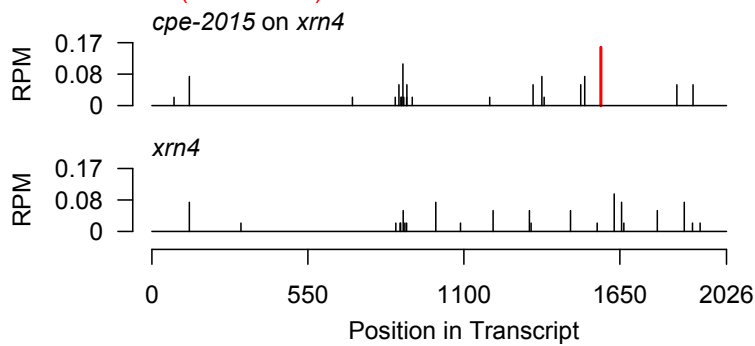

**Allenscore:** 1

**Target Interaction:**

```
5'- GCUGAAGCACAUUGAACGACUUA AT1G67310.1
   || |||||||
3'- CG - CUUCGUGUACUUGCUGAAU CI_ccm_23
```

**Target Site:** 334

**Superfamily:** SupFam\_39

**miRNAin ccm:** Yes

**Published name:** Not published

**Confirmed Targeting**

*2nd-siRNA* *NanoPARE*

|                 |                 |
|-----------------|-----------------|
| <i>ccm</i>      | <i>ccm</i>      |
| <i>cpe-2015</i> | <i>cpe-2015</i> |
| <i>cpe-2017</i> |                 |
| <i>cgr-dp</i>   | <i>cgr-dp</i>   |
| <i>cgr-pm</i>   |                 |
| <i>cgr-mass</i> |                 |
| <i>cin</i>      | <i>cin</i>      |

**Calmodulin-binding\_transcription\_activat**

AT1G67310 - CI\_ccm\_23

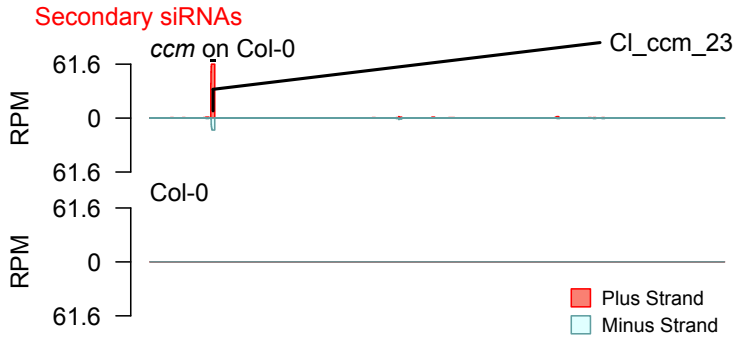

Diff. Exp. secondary siRNA  
locus not found

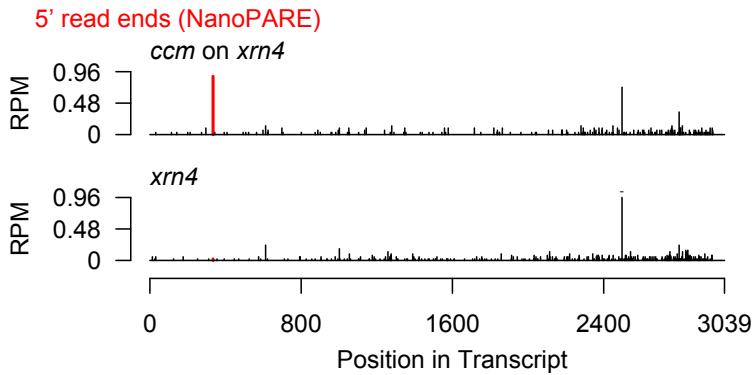



**Allenscore:** 3.5

**Target Interaction:**

5'- AUGGAUGUUAUCUGCCAAGCA AT5G11200.1  
 |||:|||||:||||:|||||  
 3'- UACCUACAGUAGGUGGUUCGA CI\_cin\_42282

**Target Site:** 359

**Superfamily:** SupFam\_1585

**miRNAin ccm:** N/A

**Published name:** N/A

**Confirmed Targeting**

| 2nd-siRNA | NanoPARE |
|-----------|----------|
| ccm       | ccm      |
| cpe-2015  | cpe-2015 |
| cpe-2017  |          |
| cgr-dp    | cgr-dp   |
| cgr-pm    |          |
| cgr-mass  |          |
| cin       | cin      |

**UAP56b**

AT5G11200 - CI\_cin\_42282

**Secondary siRNAs**

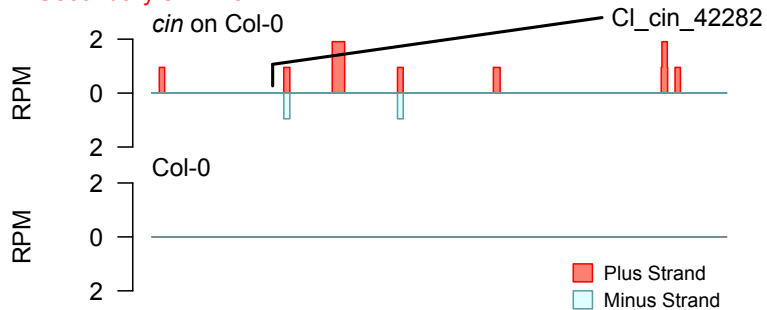

Diff. Exp. secondary siRNA locus not found

**5' read ends (NanoPARE)**

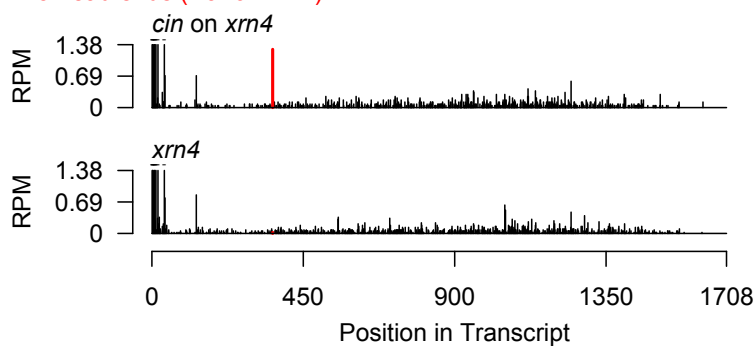

**Allenscore:** 1

**Target Interaction:**

5'- CUAGUCUACGAGUUUAUGCAA AT2G39660.1  
          |||||                  :          |||||  
3'- GAUCAGAUGCUUAAAUACGUUU CI\_ccm\_7

**Target Site:** 870

**Superfamily:** SupFam\_1

**miRNAin ccm:** Yes

**Published name:** ccm-MIR12463b

**Confirmed Targeting**

2nd-siRNA NanoPARE

|                 |                 |
|-----------------|-----------------|
| <i>ccm</i>      | <i>ccm</i>      |
| <i>cpe-2015</i> | <i>cpe-2015</i> |
| <i>cpe-2017</i> |                 |
| <i>cgr-dp</i>   | <i>cgr-dp</i>   |
| <i>cgr-pm</i>   |                 |
| <i>cgr-mass</i> |                 |
| <i>cin</i>      | <i>cin</i>      |

**BIK1**

AT2G39660 - CI\_ccm\_7

**Secondary siRNAs**

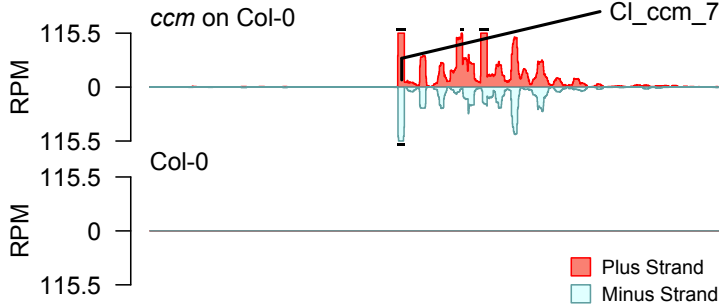

**5' read ends (NanoPARE)**

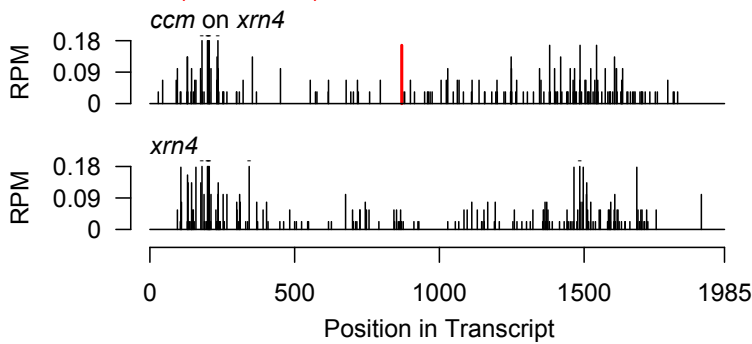

**2nd siRNAs: Phase diagram**

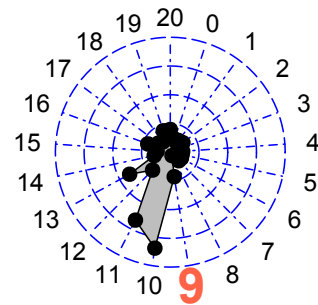

**2nd siRNAs: Size distribution**

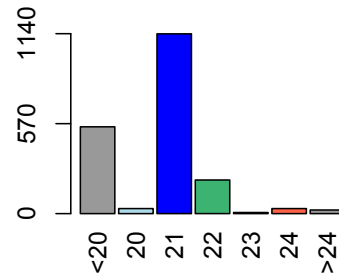

**Allenscore:** 2

**Target Interaction:**

5'- AGUCUACGAGUUUAUGCAAA AT2G39660.1  
                          |                  |                  |                  |  
3'- CCAGAUGCUUAAAUACGUUU CI\_ccm\_7146

**Target Site:** 870

**Superfamily:** SupFam\_1

**miRNA in ccm:** Yes

**Published name:** Not published

**Confirmed Targeting**

2nd-siRNA NanoPARE

|                 |                 |
|-----------------|-----------------|
| <i>ccm</i>      | <i>ccm</i>      |
| <i>cpe-2015</i> | <i>cpe-2015</i> |
| <i>cpe-2017</i> |                 |
| <i>cgr-dp</i>   | <i>cgr-dp</i>   |
| <i>cgr-pm</i>   |                 |
| <i>cgr-mass</i> |                 |
| <i>cin</i>      | <i>cin</i>      |

**BIK1**

AT2G39660 - CI\_ccm\_7146

**Secondary siRNAs**

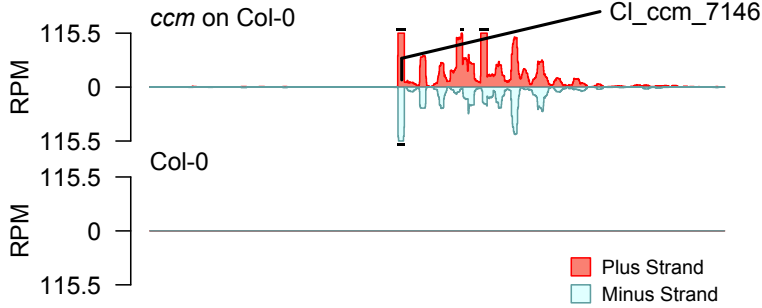

**5' read ends (NanoPARE)**

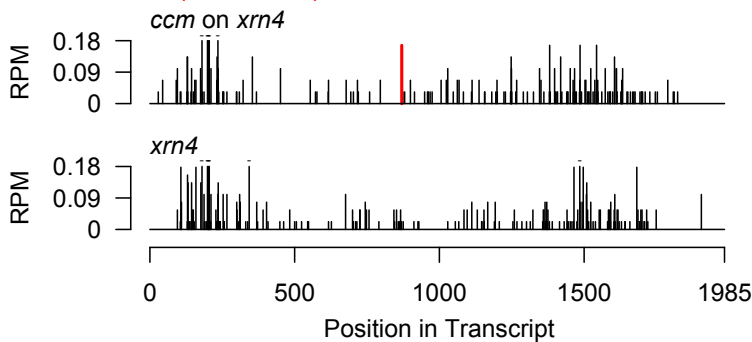

**2nd siRNAs: Phase diagram**

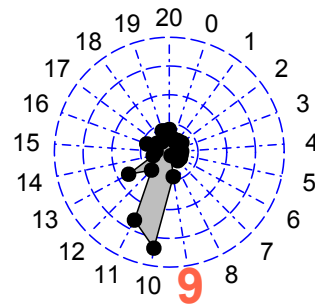

**2nd siRNAs: Size distribution**

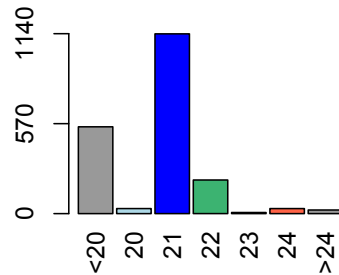

Alenscore: 2

Target Interaction:

5'- UAUGGGUACGCCGCGCCUGAGUA AT2G39660.1  
 | | | | | | | | | | | | | | | | | | | | | | |  
 3'- UUACCGAUGCGGCGCGGACUCAU CI\_ccm\_117

Target Site: 1156

Superfamily: SupFam\_190

miRNAin ccm: Yes

Published name: Not published

Confirmed Targeting

2nd-siRNA NanoPARE

|          |          |
|----------|----------|
| ccm      | ccm      |
| cpe-2015 | cpe-2015 |
| cpe-2017 |          |
| cgr-dp   | cgr-dp   |
| cgr-pm   |          |
| cgr-mass |          |
| cin      | cin      |

**BIK1**

AT2G39660 - CI\_ccm\_117

Secondary siRNAs

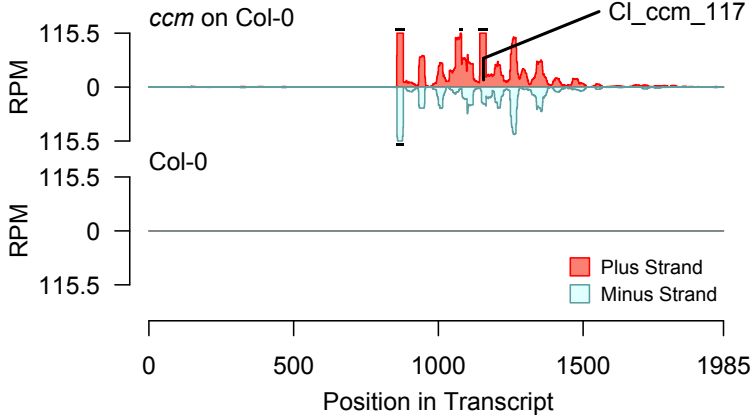

Degradome hits not found for sRNA

2nd siRNAs: Phase diagram

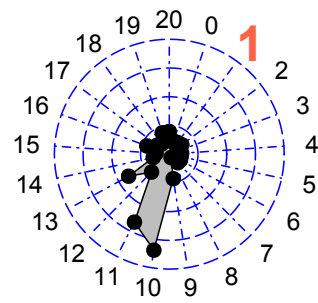

2nd siRNAs: Size distribution

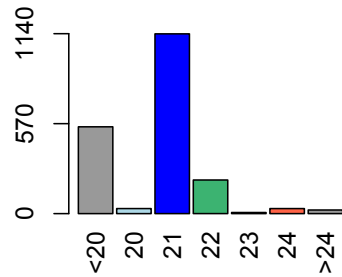



Allenscore: 1

Target Interaction:

5'- GGGUACGCCGCGCCUGAGUA AT2G39660.1
|||
3'- CCGAUGC GCGCGGACUCAU CI\_ccm\_23740

Target Site: 1156

Superfamily: SupFam\_190

miRNAin ccm: Yes

Published name: Not published

Confirmed Targeting

2nd-siRNA NanoPARE

Table with 2 columns: 2nd-siRNA, NanoPARE. Rows include ccm, cpe-2015, cpe-2017, cgr-dp, cgr-pm, cgr-mass, cin.

BIK1

AT2G39660 - CI\_ccm\_23740

Secondary siRNAs

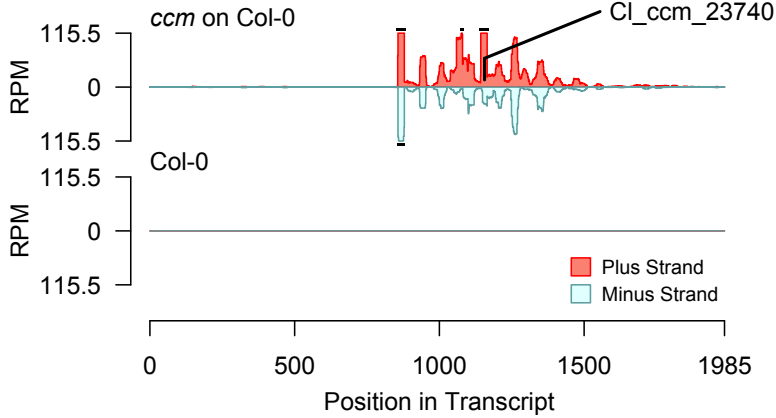

Degradome hits not found for sRNA

2nd siRNAs: Phase diagram

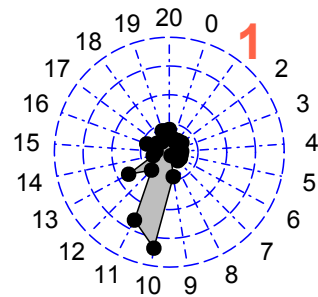

2nd siRNAs: Size distribution

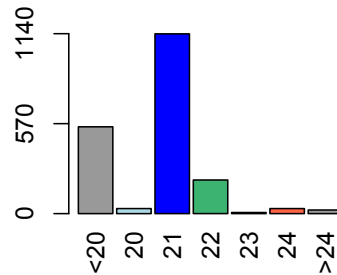

**Allenscore:** 1

**Target Interaction:**

5'- CUAGUCUACGAGUUUAUGCAA AT2G39660.1  
          |||||||              :|||||||  
3'- GAUCAGAUCUUAAAUACGUUU CI\_cpe-2015\_5

**Target Site:** 870

**Superfamily:** SupFam\_1

**miRNAin ccm:** Yes

**Published name:** N/A

**Confirmed Targeting**

2nd-siRNA NanoPARE

|                 |                 |
|-----------------|-----------------|
| <i>ccm</i>      | <i>ccm</i>      |
| <i>cpe-2015</i> | <i>cpe-2015</i> |
| <i>cpe-2017</i> |                 |
| <i>cgr-dp</i>   | <i>cgr-dp</i>   |
| <i>cgr-pm</i>   |                 |
| <i>cgr-mass</i> |                 |
| <i>cin</i>      | <i>cin</i>      |

**BIK1**

AT2G39660 - CI\_cpe-2015\_5

**Secondary siRNAs**

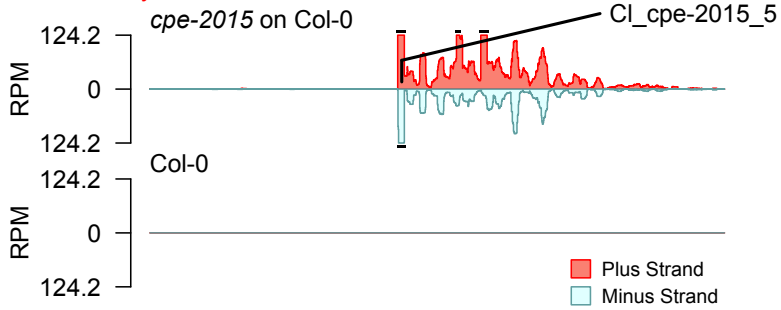

**5' read ends (NanoPARE)**

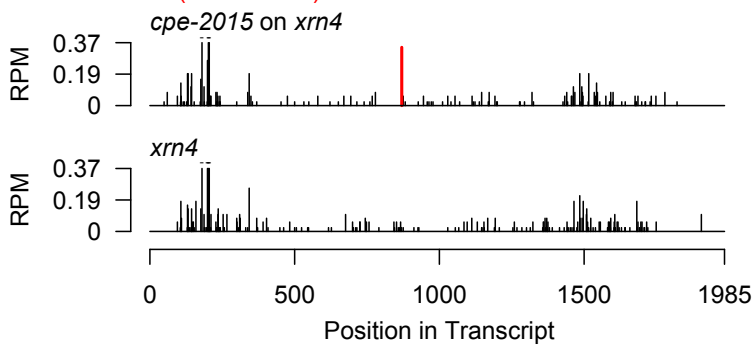

**2nd siRNAs: Phase diagram**

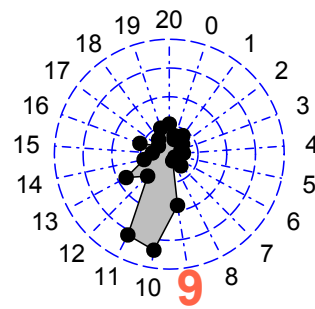

**2nd siRNAs: Size distribution**

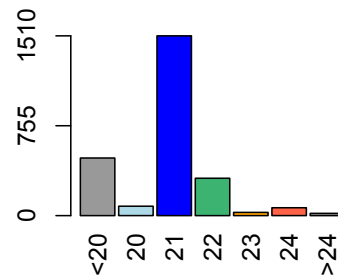

**Allenscore:** 2

**Target Interaction:**

5'- AGUCUACGAGUUUAUGCAA AT2G39660.1  
 |||:|||||  
 3'- CCAGAUCUUAAAUACGUUU CI\_cpe-2015\_4852

**Target Site:** 870

**Superfamily:** SupFam\_1

**miRNAin ccm:** Yes

**Published name:** N/A

**Confirmed Targeting**

| 2nd-siRNA       | NanoPARE        |
|-----------------|-----------------|
| <i>ccm</i>      | <i>ccm</i>      |
| <i>cpe-2015</i> | <i>cpe-2015</i> |
| <i>cpe-2017</i> |                 |
| <i>cgr-dp</i>   | <i>cgr-dp</i>   |
| <i>cgr-pm</i>   |                 |
| <i>cgr-mass</i> |                 |
| <i>cin</i>      | <i>cin</i>      |

|                 |                 |
|-----------------|-----------------|
| <i>ccm</i>      | <i>ccm</i>      |
| <i>cpe-2015</i> | <i>cpe-2015</i> |
| <i>cpe-2017</i> |                 |
| <i>cgr-dp</i>   | <i>cgr-dp</i>   |
| <i>cgr-pm</i>   |                 |
| <i>cgr-mass</i> |                 |
| <i>cin</i>      | <i>cin</i>      |

**BIK1**

AT2G39660 - CI\_cpe-2015\_4852

**Secondary siRNAs**

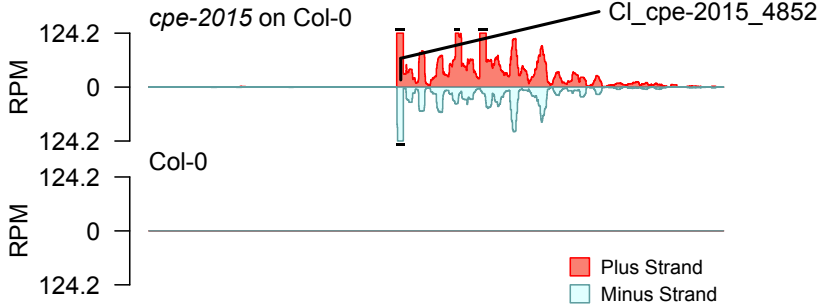

**5' read ends (NanoPARE)**

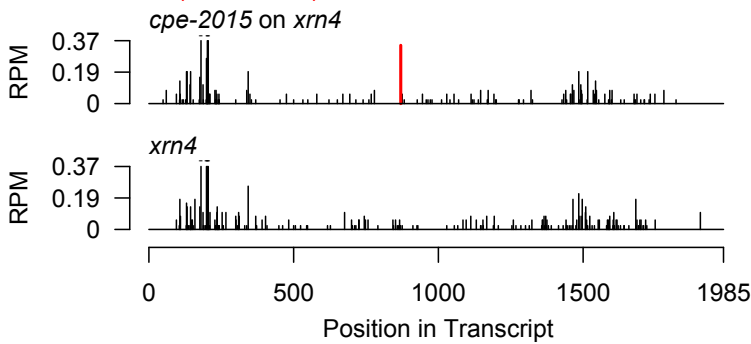

**2nd siRNAs: Phase diagram**

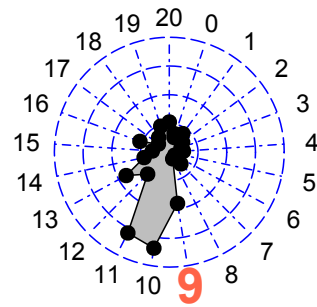

**2nd siRNAs: Size distribution**

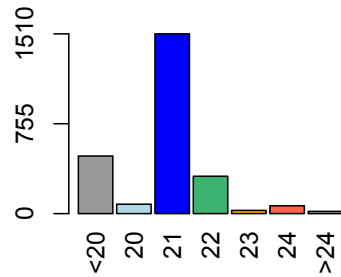

Allenscore: 2

Target Interaction:

```

5'- UAUGGGUACGCCGCGCCUGAGUA  AT2G39660.1
      |||  ||||  ||||  ||||  ||||  ||||
3'- UUACCGAUGCGGCGGGACUCAU  CI_cpe-2015_953

```

Target Site: 1156

Superfamily: SupFam\_190

miRNAin ccm: Yes

Published name: N/A

Confirmed Targeting

| 2nd-siRNA       | NanoPARE        |
|-----------------|-----------------|
| <i>ccm</i>      | <i>ccm</i>      |
| <i>cpe-2015</i> | <i>cpe-2015</i> |
| <i>cpe-2017</i> |                 |
| <i>cgr-dp</i>   | <i>cgr-dp</i>   |
| <i>cgr-pm</i>   |                 |
| <i>cgr-mass</i> |                 |
| <i>cin</i>      | <i>cin</i>      |

### BIK1

AT2G39660 - CI\_cpe-2015\_953

Secondary siRNAs

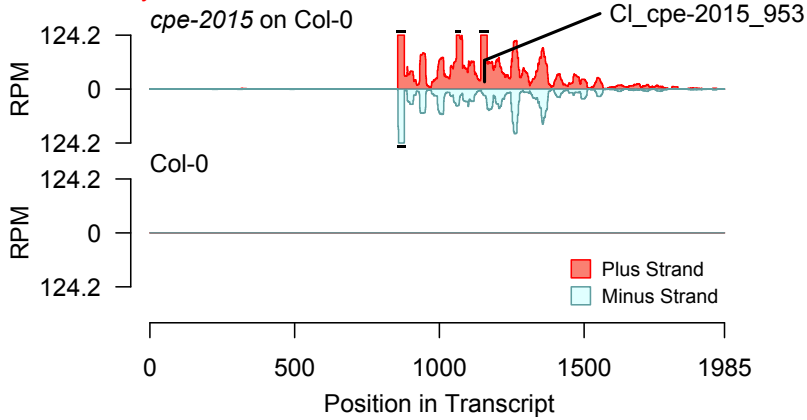

2nd siRNAs: Phase diagram

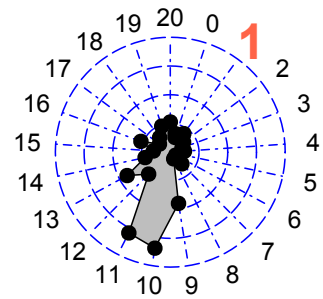

2nd siRNAs: Size distribution

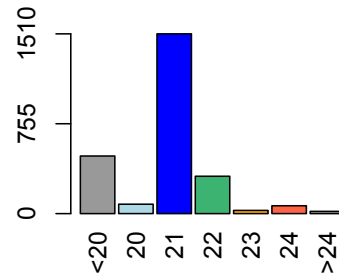

Degradome hits not found for sRNA

**Allenscore:** 1

**Target Interaction:**

5'- CUAGUCUACGAGUUUAUGCAAA AT2G39660.1  
      |||||:|||||  
3'- GAUCAGAUCUUAAAUACGUUU CI\_cpe-2017\_9

**Target Site:** 870

**Superfamily:** SupFam\_1

**miRNAin ccm:** Yes

**Published name:** N/A

**Confirmed Targeting**

*2nd-siRNA*    *NanoPARE*

|                 |                 |
|-----------------|-----------------|
| <i>ccm</i>      | <i>ccm</i>      |
| <i>cpe-2015</i> | <i>cpe-2015</i> |
| <i>cpe-2017</i> |                 |
| <i>cgr-dp</i>   | <i>cgr-dp</i>   |
| <i>cgr-pm</i>   |                 |
| <i>cgr-mass</i> |                 |
| <i>cin</i>      | <i>cin</i>      |

**BIK1**

AT2G39660 - CI\_cpe-2017\_9

**Secondary siRNAs**

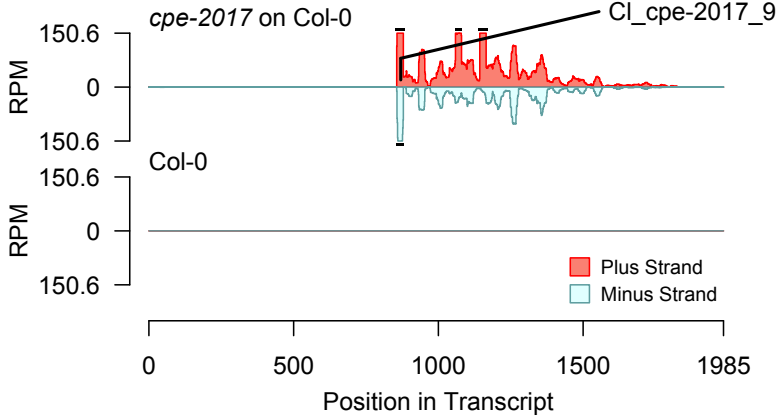

Degradome hits not found for sRNA

**2nd siRNAs: Phase diagram**

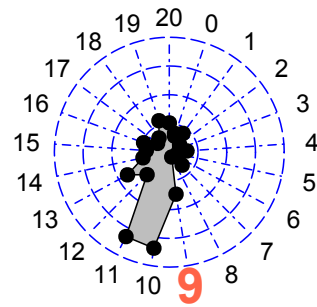

**2nd siRNAs: Size distribution**

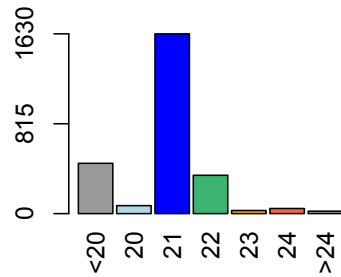

**Allenscore:** 2

**Target Interaction:**

5'- AGUCUACGAGUUUAUGCAA AT2G39660.1  
 |||||:|||||  
 3'- CCAGAUCUUAAAUACGUUU CI\_cpe-2017\_5671

**Target Site:** 870

**Superfamily:** SupFam\_1

**miRNAin ccm:** Yes

**Published name:** N/A

**Confirmed Targeting**

2nd-siRNA NanoPARE

|                 |                 |
|-----------------|-----------------|
| <i>ccm</i>      | <i>ccm</i>      |
| <i>cpe-2015</i> | <i>cpe-2015</i> |
| <i>cpe-2017</i> |                 |
| <i>cgr-dp</i>   | <i>cgr-dp</i>   |
| <i>cgr-pm</i>   |                 |
| <i>cgr-mass</i> |                 |
| <i>cin</i>      | <i>cin</i>      |

**BIK1**

AT2G39660 - CI\_cpe-2017\_5671

Secondary siRNAs

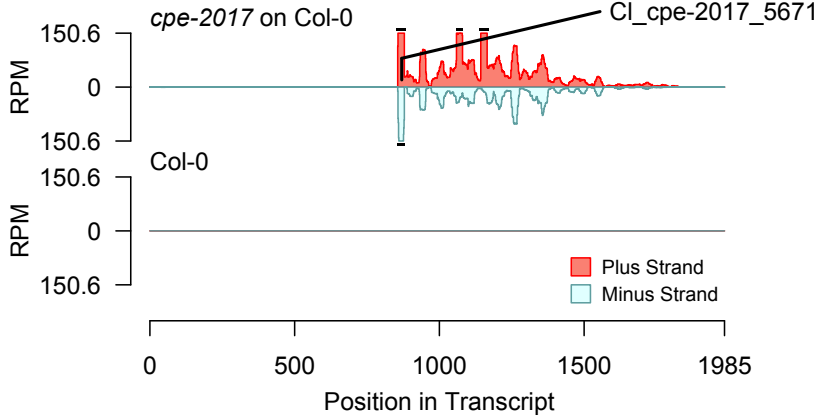

2nd siRNAs: Phase diagram

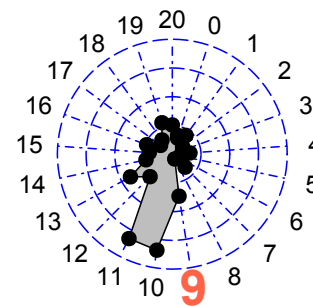

2nd siRNAs: Size distribution

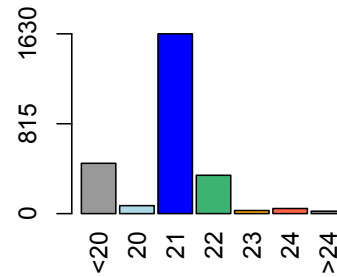

Degradome hits not found for sRNA

**Allenscore:** 2

**Target Interaction:**

```
5'- UAUGGGUACGCCGCGCCUGAGUA   AT2G39660.1
   ||||| ||||||| ||||||| |||||||
3'- UUACCGAUGC GCGCGGACUCAU   CI_cpe-2017_695
```

**Target Site:** 1156

**Superfamily:** SupFam\_190

**miRNAin ccm:** Yes

**Published name:** N/A

### Confirmed Targeting

2nd-siRNA NanoPARE

|          |          |
|----------|----------|
| ccm      | ccm      |
| cpe-2015 | cpe-2015 |
| cpe-2017 |          |
| cgr-dp   | cgr-dp   |
| cgr-pm   |          |
| cgr-mass |          |
| cin      | cin      |

## BIK1

AT2G39660 - CI\_cpe-2017\_695

### Secondary siRNAs

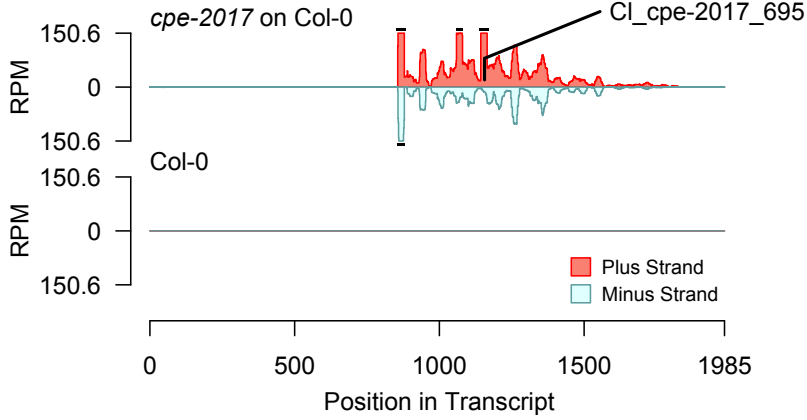

### 2nd siRNAs: Phase diagram

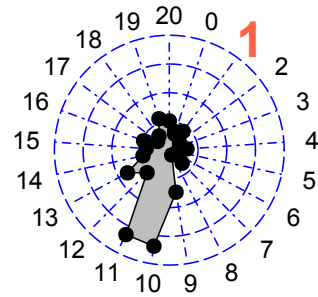

### 2nd siRNAs: Size distribution

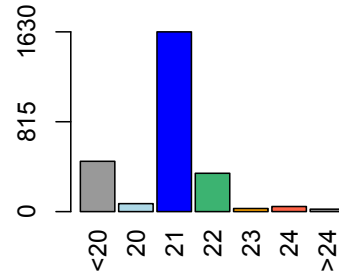

Degradome hits not found for sRNA

**Allenscore:** 4.5

**Target Interaction:**

5'- UUGUUUAUGAAAGGGAUACA AT1G10900.1  
| : | | | | | | | | | | : | | | | | |  
3'- UUCGAAUACUUUCUCUUAUGA CI\_cgr-dp\_539

**Target Site:** 1185

**Superfamily:** SupFam\_370

**miRNAin ccm:** N/A

**Published name:** N/A

**Confirmed Targeting**

*2nd-siRNA*    *NanoPARE*

|                 |                 |
|-----------------|-----------------|
| <i>ccm</i>      | <i>ccm</i>      |
| <i>cpe-2015</i> | <i>cpe-2015</i> |
| <i>cpe-2017</i> |                 |
| <i>cgr-dp</i>   | <i>cgr-dp</i>   |
| <i>cgr-pm</i>   |                 |
| <i>cgr-mass</i> |                 |
| <i>cin</i>      | <i>cin</i>      |

### Phosphatidylinositol-4-phosphate\_5-kinas

AT1G10900 - CI\_cgr-dp\_539

**Secondary siRNAs**

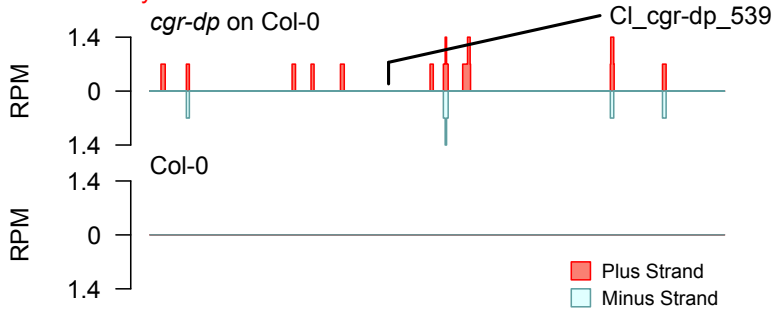

Diff. Exp. secondary siRNA  
locus not found

**5' read ends (NanoPARE)**

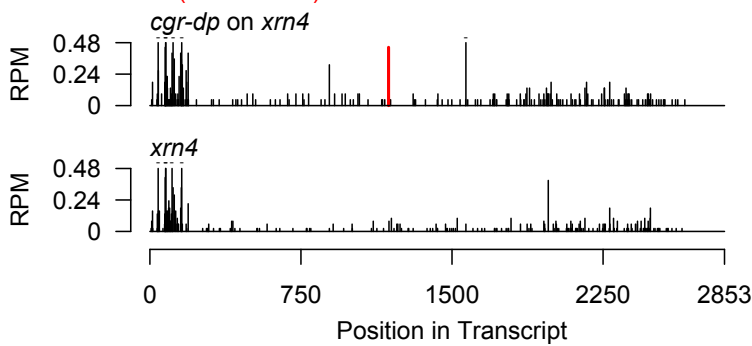





**Allenscore:** 4

**Target Interaction:**

```
5'- UGAGCUACUUACACCAAAAUA AT4G38470.1
   | : || | | | : | | | | | | | | |
3'- AUUCUAUGGUUGUGUUUUUAU CI_cin_14840
```

**Target Site:** 1743

**Superfamily:** SupFam\_189

**miRNAin ccm:** N/A

**Published name:** N/A

**Confirmed Targeting**

2nd-siRNA NanoPARE

|                 |                 |
|-----------------|-----------------|
| <i>ccm</i>      | <i>ccm</i>      |
| <i>cpe-2015</i> | <i>cpe-2015</i> |
| <i>cpe-2017</i> |                 |
| <i>cgr-dp</i>   | <i>cgr-dp</i>   |
| <i>cgr-pm</i>   |                 |
| <i>cgr-mass</i> |                 |
| <i>cin</i>      | <i>cin</i>      |

**STY46**

AT4G38470 - CI\_cin\_14840

**Secondary siRNAs**

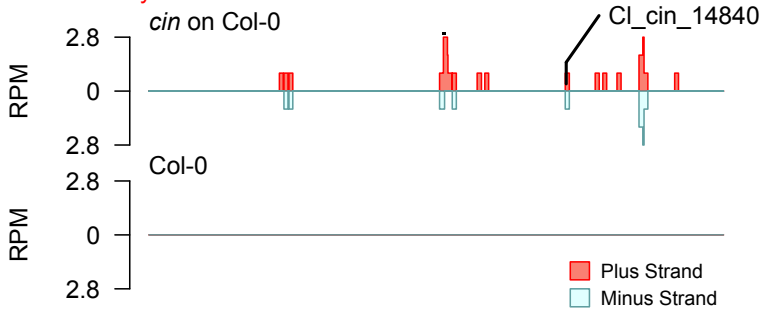

Diff. Exp. secondary siRNA locus not found

**5' read ends (NanoPARE)**

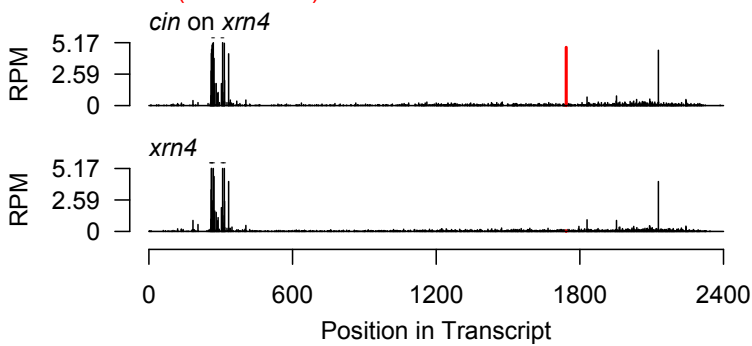

**Allenscore:** 3.5

**Target Interaction:**

5'- UGAGCUACUUACACCAAAAUA AT4G38470.1  
          | | | | | | | | : | | | | | | | | | |  
3'- CCUCGAUGGACGUGGUUUUUAU CI\_cin\_176

**Target Site:** 1743

**Superfamily:** SupFam\_189

**miRNAin ccm:** N/A

**Published name:** N/A

**Confirmed Targeting**

2nd-siRNA    NanoPARE

|                 |                 |
|-----------------|-----------------|
| <i>ccm</i>      | <i>ccm</i>      |
| <i>cpe-2015</i> | <i>cpe-2015</i> |
| <i>cpe-2017</i> |                 |
| <i>cgr-dp</i>   | <i>cgr-dp</i>   |
| <i>cgr-pm</i>   |                 |
| <i>cgr-mass</i> |                 |
| <i>cin</i>      | <i>cin</i>      |

**STY46**

AT4G38470 - CI\_cin\_176

**Secondary siRNAs**

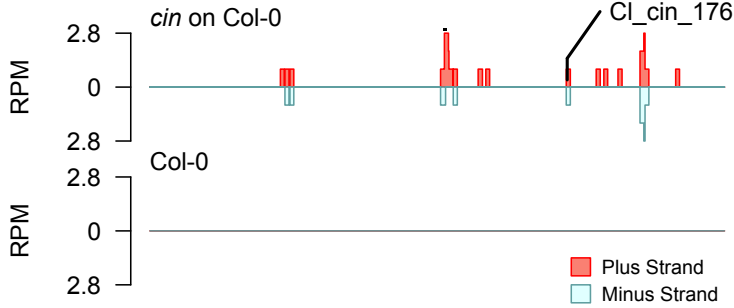

Diff. Exp. secondary siRNA locus not found

**5' read ends (NanoPARE)**

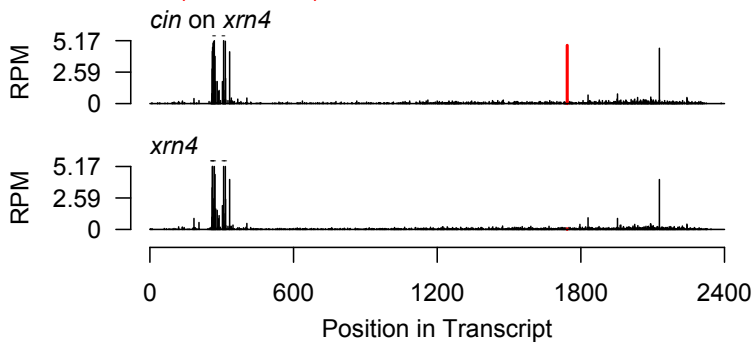

**Allenscore:** 4.5

**Target Interaction:**

5'- UGAGCUACUUACACCAAAAUA AT4G38470.1  
          |||:|||||:||||:|  
3'- UCUCGAUGGAUGUAGUUUUGU CI\_cin\_21889

**Target Site:** 1743

**Superfamily:** SupFam\_189

**miRNAin ccm:** N/A

**Published name:** N/A

**Confirmed Targeting**

2nd-siRNA    NanoPARE

|                 |                 |
|-----------------|-----------------|
| <i>ccm</i>      | <i>ccm</i>      |
| <i>cpe-2015</i> | <i>cpe-2015</i> |
| <i>cpe-2017</i> |                 |
| <i>cgr-dp</i>   | <i>cgr-dp</i>   |
| <i>cgr-pm</i>   |                 |
| <i>cgr-mass</i> |                 |
| <i>cin</i>      | <i>cin</i>      |

**STY46**

AT4G38470 - CI\_cin\_21889

**Secondary siRNAs**

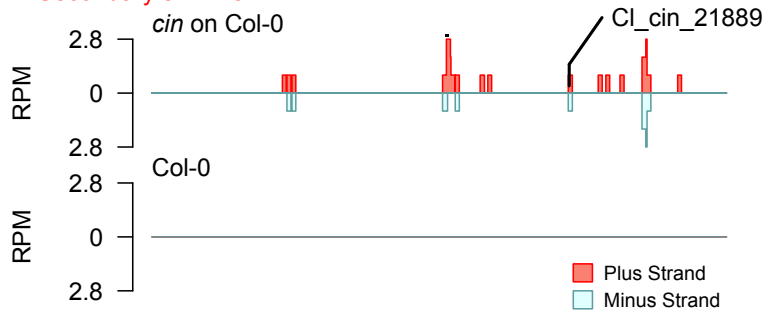

Diff. Exp. secondary siRNA locus not found

**5' read ends (NanoPARE)**

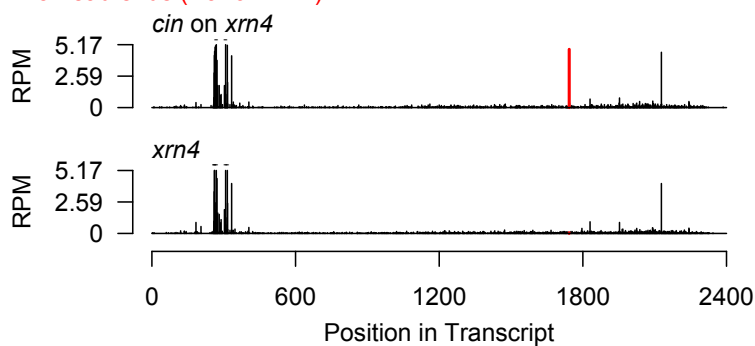

Supplement: elife-49750-supp6.pdf [file elife-49750-supp6.pdf]
