# Supplementary material for: Compensatory sequence variation between trans-species small RNAs and their target sites
Source: PubMed Central journal article supplement (PMC6917502; doi:10.7554/elife.49750), 2019-12-17

**AT3G45640 - MPK3**

35/36 homologs found in phytozome eudicots containing targetsite

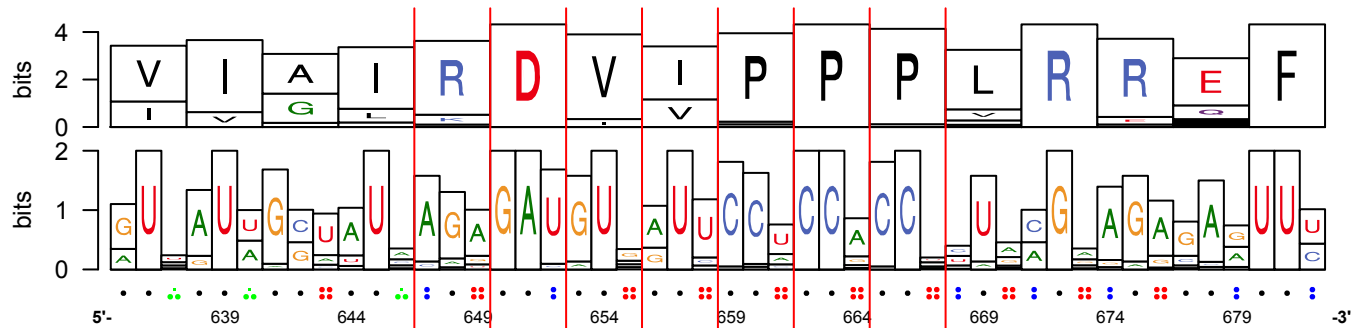

**SupFam\_203**

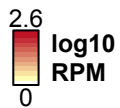

- Cl\_cgr-dp\_22
- Cl\_cgr-dp\_26933
- Cl\_cgr-mass\_1260
- Cl\_cgr-mass\_18589

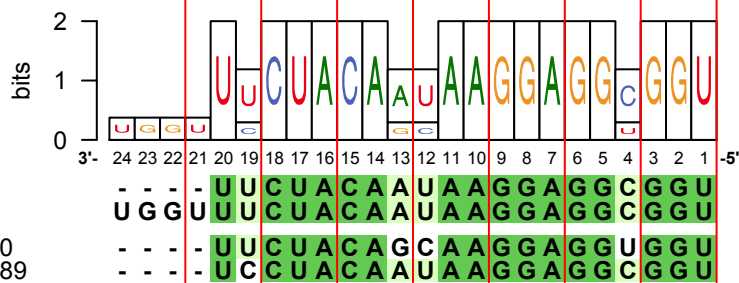

**Perc. ID**

- >80%
- >60%
- >40%
- <40%

**AT1G53440 - Leucine-rich\_repeat\_transmembrane\_protein\_kinase**  
**36/36 homologs found in phytozome eudicots containing targetsite**

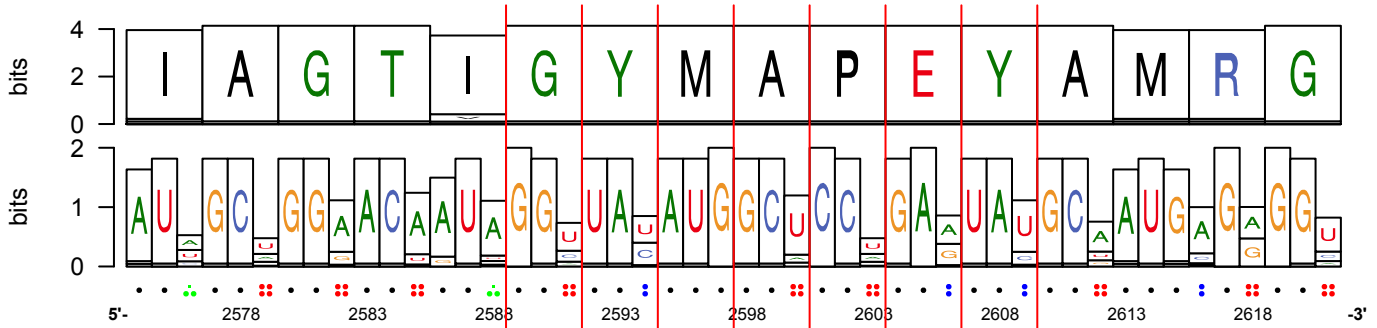

**SupFam\_59**

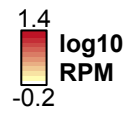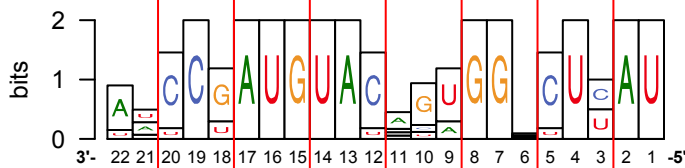

- Cl\_cgr-pm\_346
- Cl\_cgr-pm\_4710
- Cl\_cgr-pm\_45586
- Cl\_cgr-mass\_517
- Cl\_cgr-mass\_750
- Cl\_cgr-mass\_2756
- Cl\_cgr-mass\_20246
- Cl\_cgr-mass\_31780

|    |    |    |    |    |    |    |    |    |    |    |    |    |    |   |   |   |   |   |   |   |   |   |     |
|----|----|----|----|----|----|----|----|----|----|----|----|----|----|---|---|---|---|---|---|---|---|---|-----|
| 3' | 22 | 21 | 20 | 19 | 18 | 17 | 16 | 15 | 14 | 13 | 12 | 11 | 10 | 9 | 8 | 7 | 6 | 5 | 4 | 3 | 2 | 1 | -5' |
|    | A  | A  | C  | C  | G  | A  | U  | G  | U  | A  | C  | A  | G  | U | G | G | G | C | U | C | A | U |     |
|    | -  | C  | C  | G  | A  | U  | G  | U  | A  | C  | A  | A  | U  | G | G | U | C | C | U | U | A | U |     |
|    | -  | -  | U  | C  | G  | A  | U  | G  | U  | A  | C  | A  | G  | U | G | G | G | C | U | C | A | U |     |
|    | A  | A  | C  | C  | G  | A  | U  | G  | U  | A  | C  | A  | G  | U | G | G | A | C | U | C | A | U |     |
|    | U  | U  | C  | C  | U  | A  | U  | G  | U  | A  | C  | U  | G  | U | G | G | A | C | U | U | A | U |     |
|    | A  | U  | C  | C  | G  | A  | U  | G  | U  | A  | C  | G  | G  | A | G | G | U | C | U | C | A | U |     |
|    | A  | A  | C  | C  | G  | A  | U  | G  | U  | A  | C  | A  | C  | A | G | G | U | U | U | A | U | A |     |

**Perc. ID**

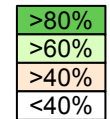

**AT4G28490 - HAE**

34/36 homologs found in phytozome eudicots containing targetsite

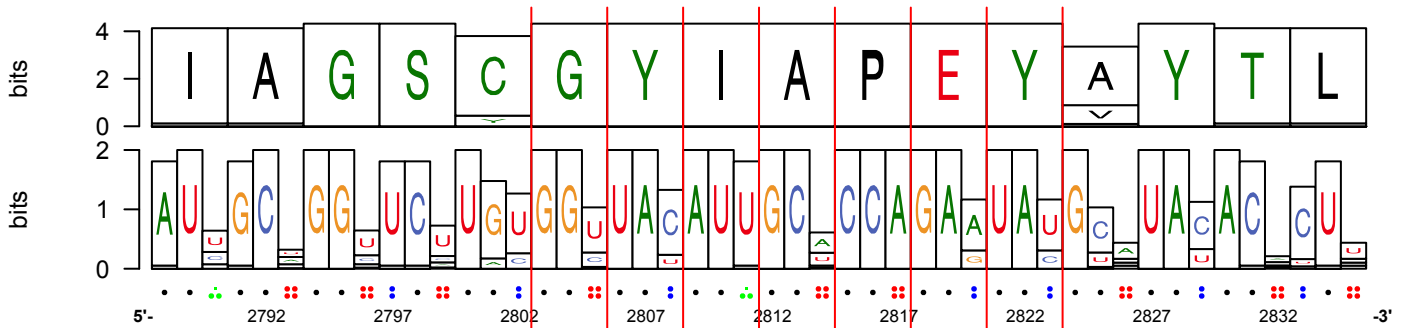

**SupFam\_124**

1.8  
log10  
RPM  
0.2

- Cl\_ccm\_818
- Cl\_cpe-2015\_211
- Cl\_cpe-2015\_16899
- Cl\_cpe-2017\_183
- Cl\_cpe-2017\_14364

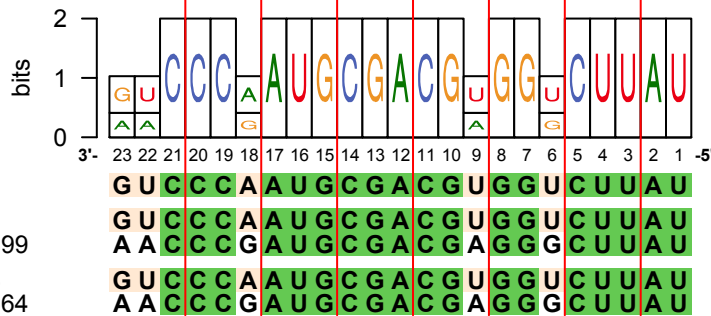

**Perc. ID**

- >80%
- >60%
- >40%
- <40%

**AT1G12820 - AFB3**

36/36 homologs found in phytozome eudicots containing targetsite

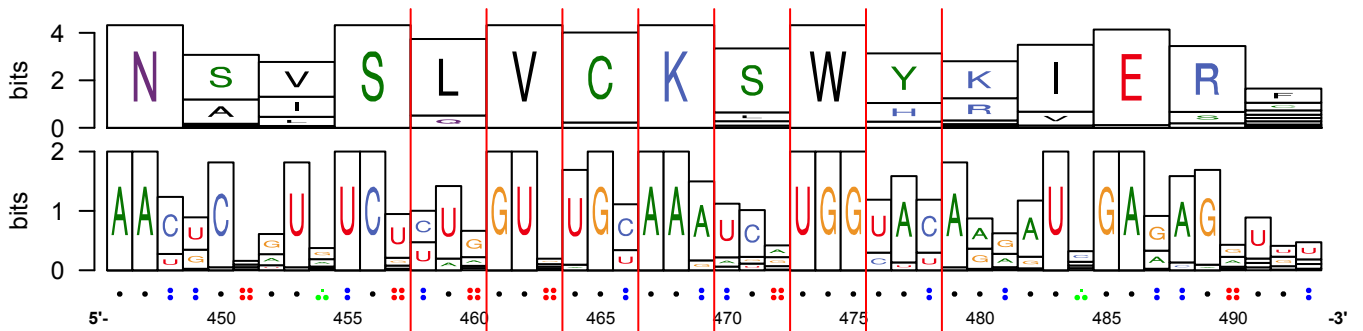

**SupFam\_27**

3.5  
log10  
RPM  
0.3

- Cl\_ccm\_2
- Cl\_ccm\_98
- Cl\_ccm\_438
- Cl\_ccm\_614
- Cl\_ccm\_13108
- Cl\_ccm\_51538
- Cl\_cpe-2015\_7
- Cl\_cpe-2015\_526
- Cl\_cpe-2017\_11
- Cl\_cpe-2017\_486
- Cl\_cpe-2017\_29015

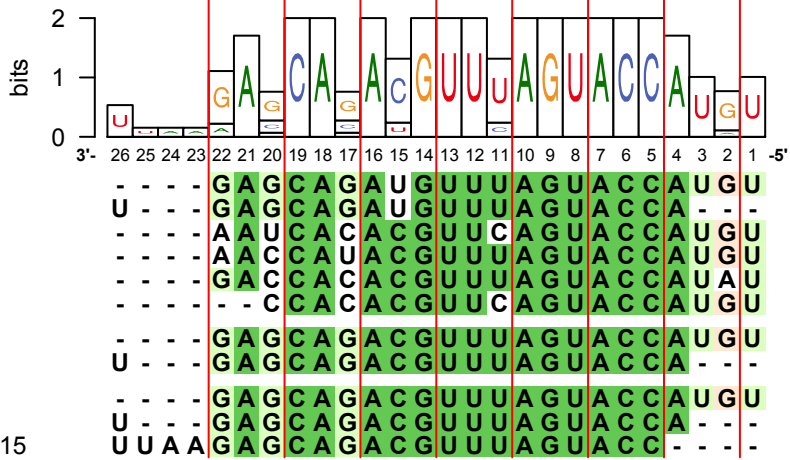

**Perc. ID**

|      |
|------|
| >80% |
| >60% |
| >40% |
| <40% |

**AT3G01680 - SEOR1**

34/36 homologs found in phytozome eudicots containing targetsite

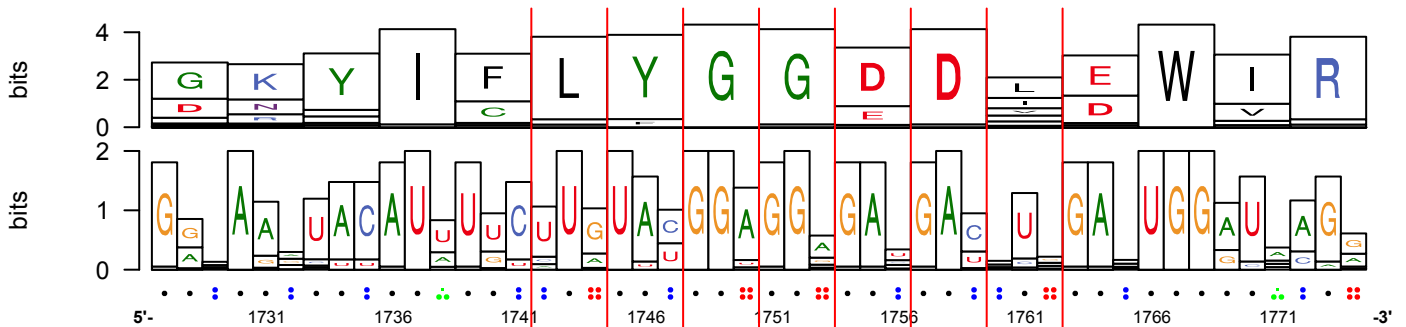

**SupFam\_5**

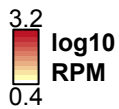

- Cl\_ccm\_535
- Cl\_ccm\_6321
- Cl\_cpe-2015\_74
- Cl\_cpe-2015\_154
- Cl\_cpe-2015\_1417
- Cl\_cpe-2017\_89
- Cl\_cpe-2017\_181
- Cl\_cpe-2017\_1111
- Cl\_cgr-dp\_6
- Cl\_cgr-pm\_5
- Cl\_cgr-pm\_394
- Cl\_cgr-pm\_571
- Cl\_cgr-mass\_721
- Cl\_cgr-mass\_4275
- Cl\_cgr-mass\_5049

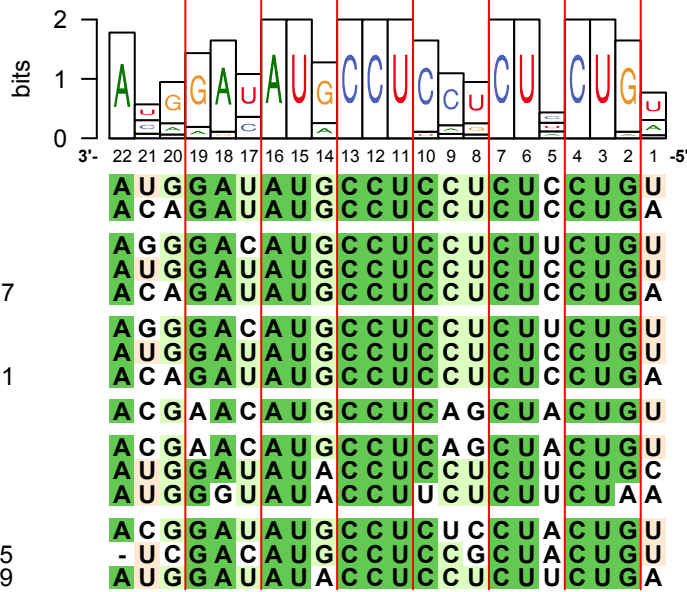

**Perc. ID**

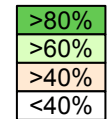

**AT4G39400 - BRI1**

**36/36 homologs found in phytozome eudicots containing targetsite**

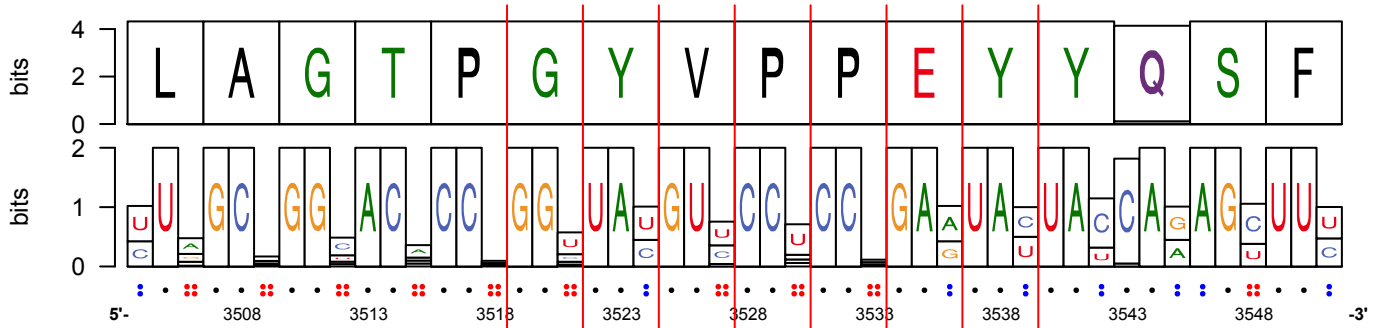

**SupFam\_59**

1.4  
log<sub>10</sub>  
RPM  
-0.2

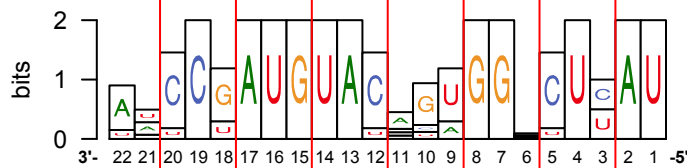

- Cl\_cgr-pm\_346
- Cl\_cgr-pm\_4710
- Cl\_cgr-pm\_45586
- Cl\_cgr-mass\_517
- Cl\_cgr-mass\_750
- Cl\_cgr-mass\_2756
- Cl\_cgr-mass\_20246
- Cl\_cgr-mass\_31780

**Perc. ID**

- >80%
- >60%
- >40%
- <40%

|   |   |   |   |   |   |   |   |   |   |   |   |   |   |   |   |   |   |   |   |   |   |
|---|---|---|---|---|---|---|---|---|---|---|---|---|---|---|---|---|---|---|---|---|---|
| A | A | C | C | G | A | U | G | U | A | C | A | G | U | G | G | G | C | U | C | A | U |
| - | C | C | C | G | A | U | G | U | A | C | A | U | G | G | U | C | U | U | A | U | U |
| - | - | U | C | G | A | U | G | U | A | C | A | G | U | G | G | G | C | U | C | A | U |
| A | A | C | C | G | A | U | G | U | A | C | A | G | U | G | G | A | C | U | C | A | U |
| U | U | C | C | U | A | U | G | U | A | C | U | G | U | G | G | A | C | U | U | A | U |
| A | U | C | C | G | A | U | G | U | A | C | G | G | A | G | G | U | C | U | C | A | U |
| A | A | C | C | G | A | U | G | U | A | C | A | C | A | G | G | U | U | U | A | U | U |

**AT5G02290 - NAK**

36/36 homologs found in phytozome eudicots containing targetsite

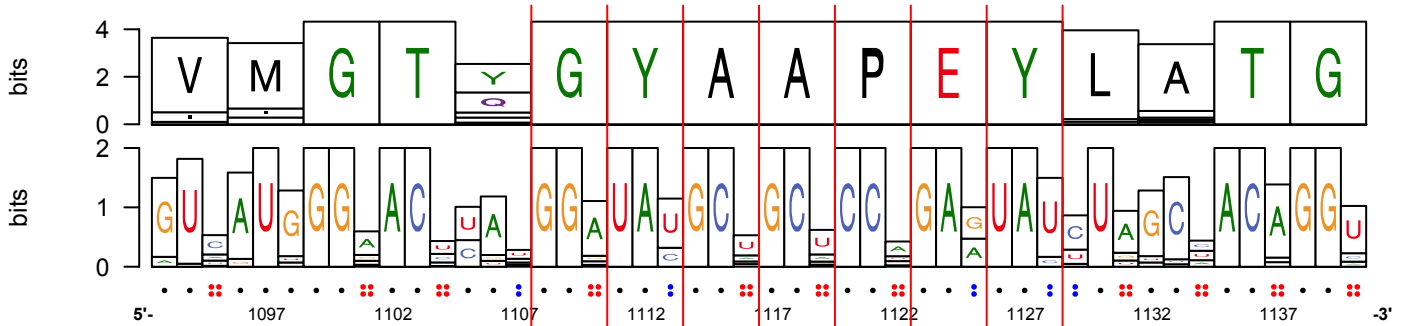

**SupFam\_124**

1.8  
log10  
RPM  
0.2

- Cl\_ccm\_818
- Cl\_cpe-2015\_211
- Cl\_cpe-2015\_16899
- Cl\_cpe-2017\_183
- Cl\_cpe-2017\_14364



**Perc. ID**

- >80%
- >60%
- >40%
- <40%

G U C C C A A U G C G A C G U G G U C U U A U  
 G U C C C A A U G C G A C G U G G U C U U A U  
 A A C C C G A U G C G A C G A G G G C U U A U  
 G U C C C A A U G C G A C G U G G U C U U A U  
 A A C C C G A U G C G A C G A G G G C U U A U



**AT2G02800 - APK2B**

33/36 homologs found in phytozome eudicots containing targetsite

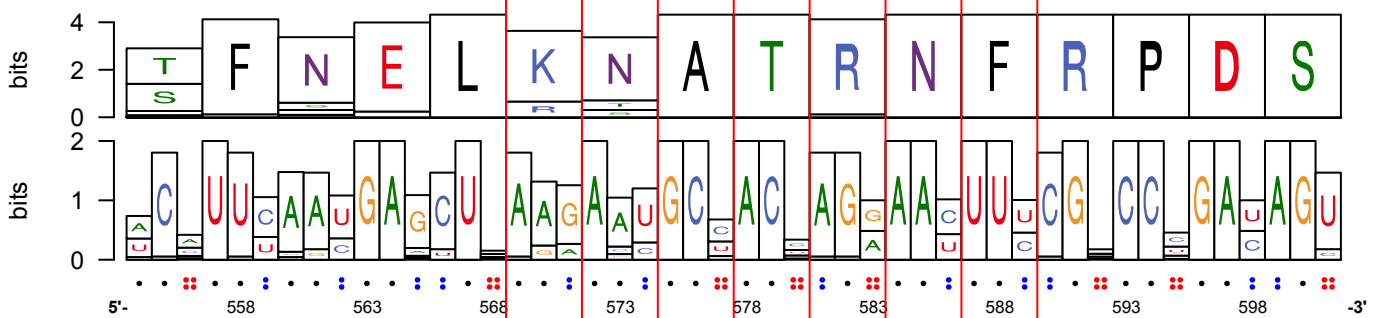

**SupFam\_26**

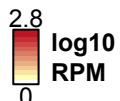

- Cl\_ccm\_411
- Cl\_cpe-2015\_76
- Cl\_cpe-2015\_558
- Cl\_cpe-2015\_16668
- Cl\_cpe-2017\_68
- Cl\_cpe-2017\_504
- Cl\_cpe-2017\_23892
- Cl\_cgr-dp\_29
- Cl\_cgr-dp\_224
- Cl\_cgr-dp\_62946
- Cl\_cgr-pm\_38
- Cl\_cgr-pm\_172
- Cl\_cgr-pm\_593
- Cl\_cgr-pm\_826
- Cl\_cgr-pm\_1268
- Cl\_cgr-pm\_23441
- Cl\_cgr-mass\_32
- Cl\_cgr-mass\_585
- Cl\_cgr-mass\_1107

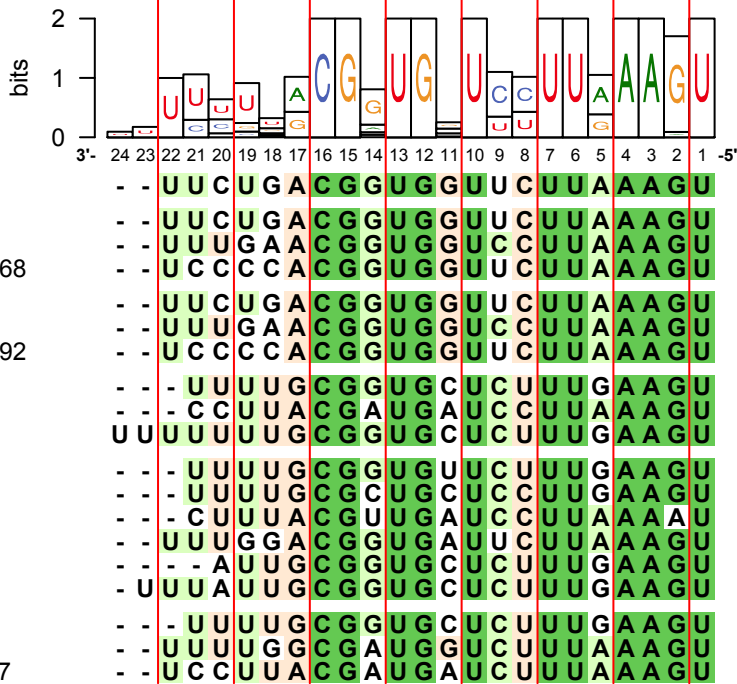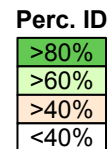

**AT5G65430 - GRF8**

**36/36 homologs found in phytozome eudicots containing targetsite**

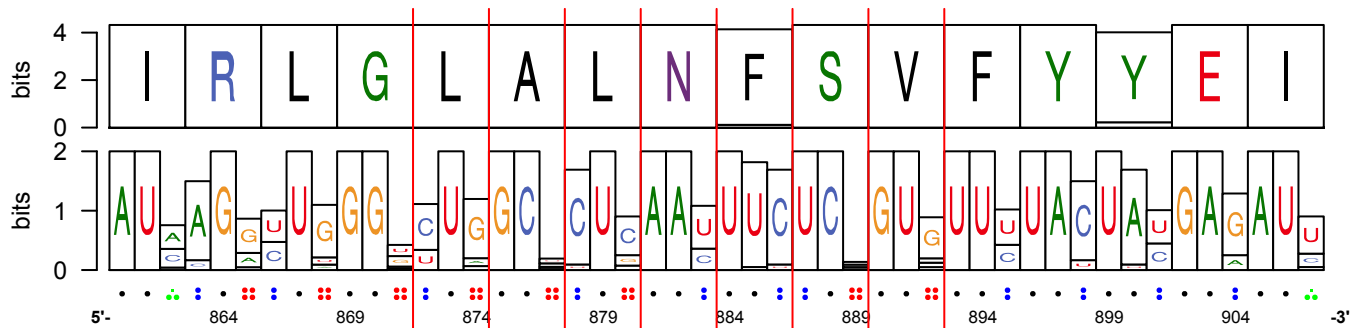

**SupFam\_24**

2.4  
log10  
RPM  
0.1

- Cl\_ccm\_439
- Cl\_ccm\_13395
- Cl\_cpe-2015\_129
- Cl\_cpe-2015\_9622
- Cl\_cpe-2017\_126
- Cl\_cpe-2017\_4564
- Cl\_cpe-2017\_40934
- Cl\_cgr-pm\_79
- Cl\_cgr-pm\_210
- Cl\_cgr-pm\_32381
- Cl\_cgr-pm\_34421
- Cl\_cgr-mass\_200
- Cl\_cgr-mass\_1414

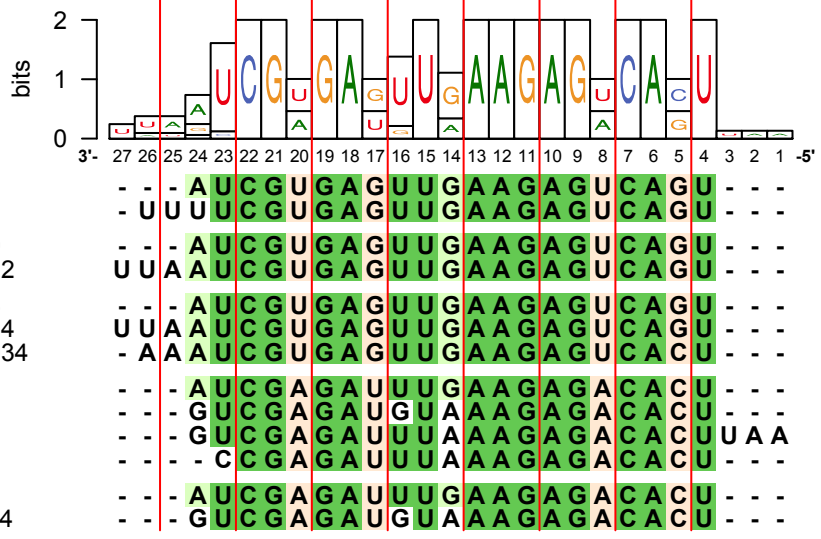

**Perc. ID**

- >80%
- >60%
- >40%
- <40%

**AT5G24010 - Protein\_kinase\_superfamily\_protein**  
**36/36 homologs found in phytozome eudicots containing targetsite**

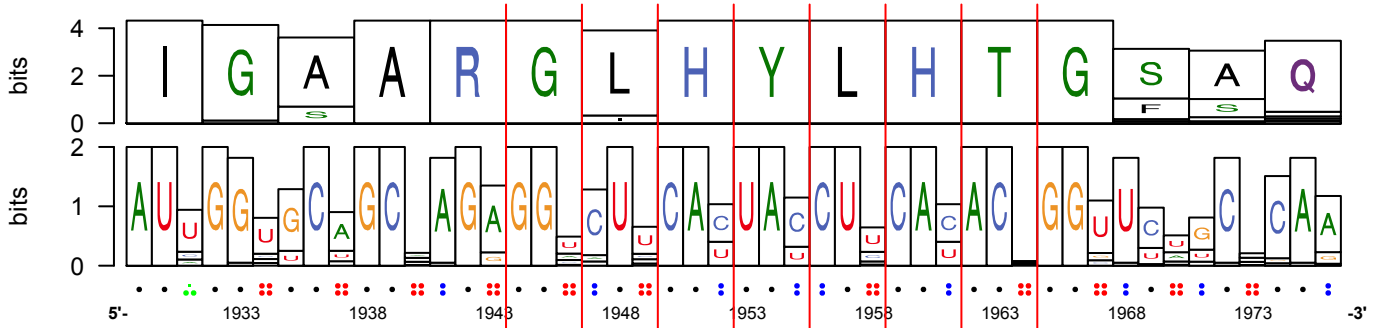

**SupFam\_49**

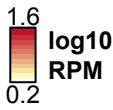

- Cl\_ccm\_1892
- Cl\_cpe-2015\_368
- Cl\_cpe-2017\_333
- Cl\_cgr-dp\_14631
- Cl\_cgr-pm\_329
- Cl\_cgr-pm\_652
- Cl\_cgr-pm\_1330
- Cl\_cgr-pm\_1915
- Cl\_cgr-pm\_8463
- Cl\_cgr-pm\_24876
- Cl\_cgr-mass\_861
- Cl\_cgr-mass\_1371
- Cl\_cgr-mass\_1911
- Cl\_cgr-mass\_3397
- Cl\_cgr-mass\_5064

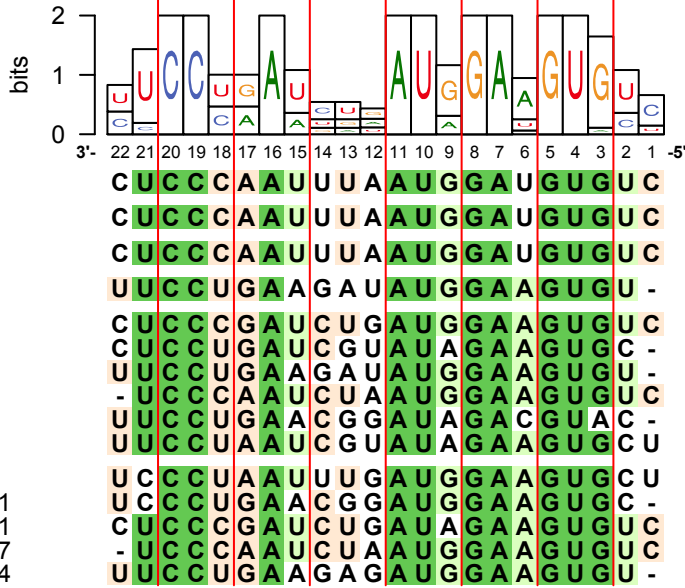

**Perc. ID**

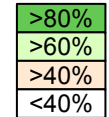

**AT3G62980 - TIR1**

35/36 homologs found in phytozome eudicots containing targetsite

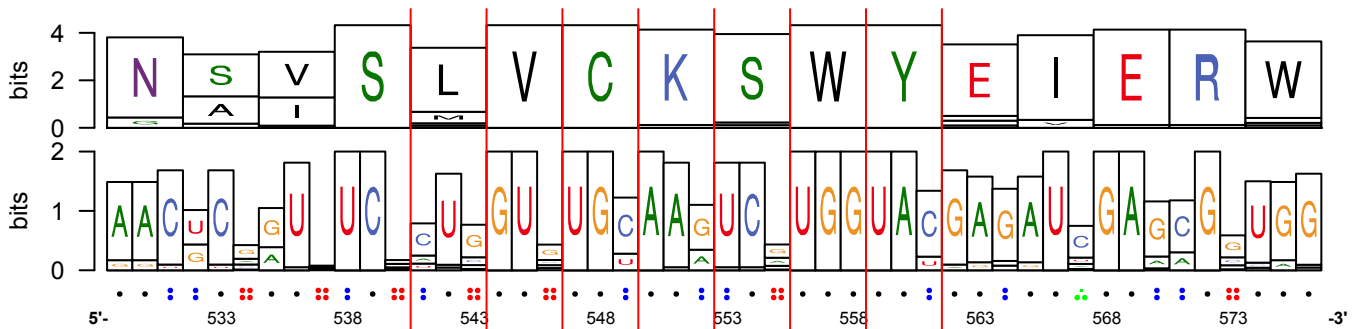

**SupFam\_27**

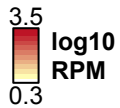

- Cl\_ccm\_2
- Cl\_ccm\_98
- Cl\_ccm\_438
- Cl\_ccm\_614
- Cl\_ccm\_13108
- Cl\_ccm\_51538
- Cl\_cpe-2015\_7
- Cl\_cpe-2015\_526
- Cl\_cpe-2017\_11
- Cl\_cpe-2017\_486
- Cl\_cpe-2017\_29015

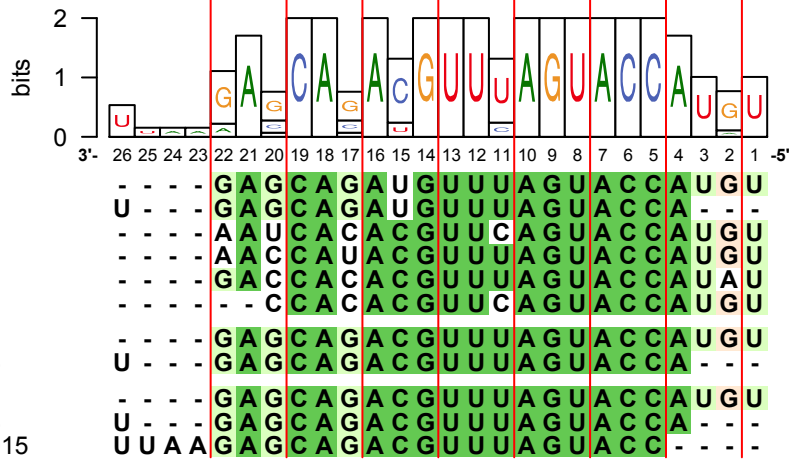

**Perc. ID**

|      |
|------|
| >80% |
| >60% |
| >40% |
| <40% |

**AT1G20696 - HMGB3**

**35/36 homologs found in phytozome eudicots containing targetsite**

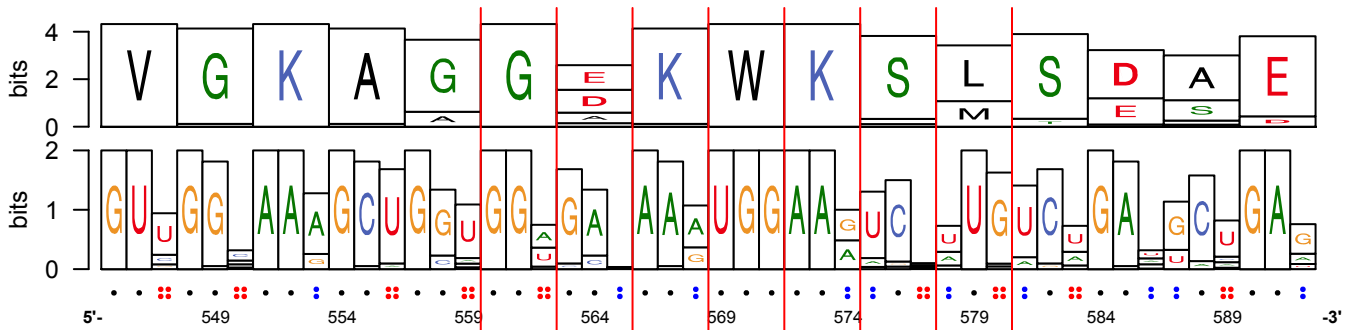

**SupFam\_20**

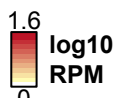

- CI\_ccm\_1979
- CI\_ccm\_4973
- CI\_ccm\_31175
- CI\_cpe-2015\_329
- CI\_cpe-2015\_1105
- CI\_cpe-2015\_8072
- CI\_cpe-2017\_445
- CI\_cpe-2017\_1282
- CI\_cpe-2017\_6102
- CI\_cgr-pm\_14644

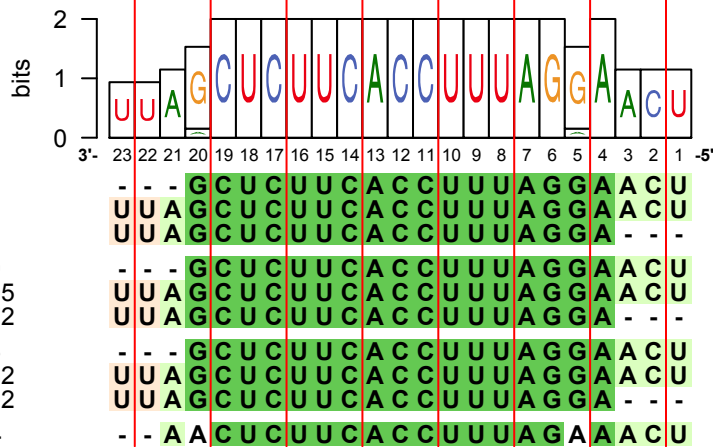

**Perc. ID**

- >80%
- >60%
- >40%
- <40%

**AT4G03190 - AFB1**

36/36 homologs found in phytozome eudicots containing targetsite

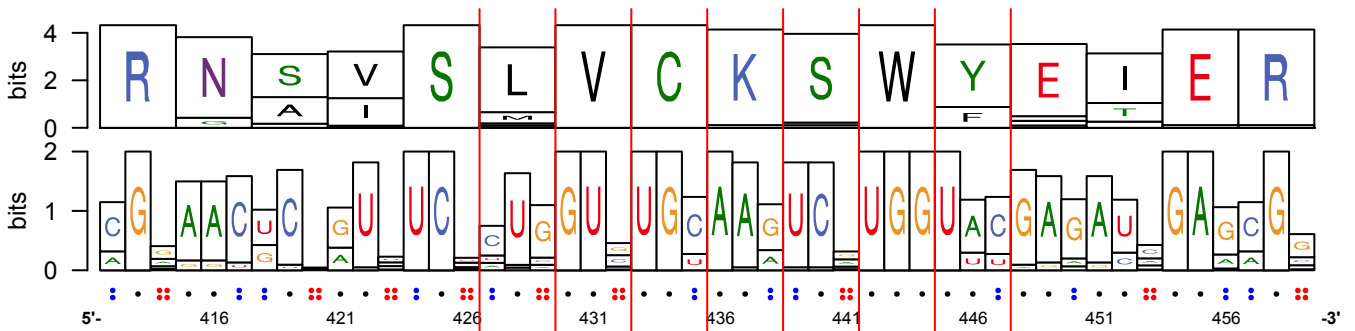

**SupFam\_27**

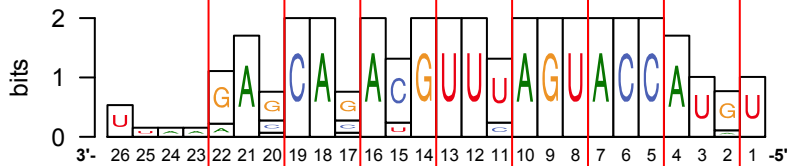

- Cl\_ccm\_2
- Cl\_ccm\_98
- Cl\_ccm\_438
- Cl\_ccm\_614
- Cl\_ccm\_13108
- Cl\_ccm\_51538
- Cl\_cpe-2015\_7
- Cl\_cpe-2015\_526
- Cl\_cpe-2017\_11
- Cl\_cpe-2017\_486
- Cl\_cpe-2017\_29015

```

3'- 26 25 24 23 22 21 20 19 18 17 16 15 14 13 12 11 10 9 8 7 6 5 4 3 2 1 -5'
- - - - G A G C A G A U G U U U A G U A C C A U G U
U - - - G A G C A G A U G U U U A G U A C C A - - -
- - - - A A U C A C A C G U U U A G U A C C A U G U
- - - - A A C C A U A C G U U U A G U A C C A U G U
- - - - G A C C A C A C G U U U A G U A C C A U A U
- - - - - - C C A C A C G U U C A G U A C C A U G U
- - - - G A G C A G A C G U U U A G U A C C A U G U
U - - - G A G C A G A C G U U U A G U A C C A - - -
- - - - G A G C A G A C G U U U A G U A C C A U G U
U - - - G A G C A G A C G U U U A G U A C C A - - -
U U A A G A G C A G A C G U U U A G U A C C - - -
    
```

**Perc. ID**

|      |
|------|
| >80% |
| >60% |
| >40% |
| <40% |

**AT3G26810 - AFB2**

36/36 homologs found in phytozome eudicots containing targetsite

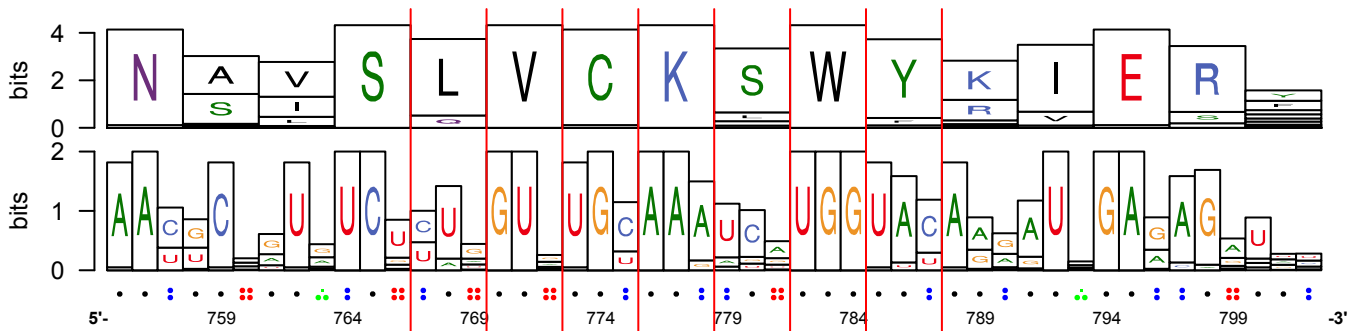

**SupFam\_27**

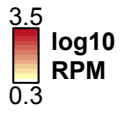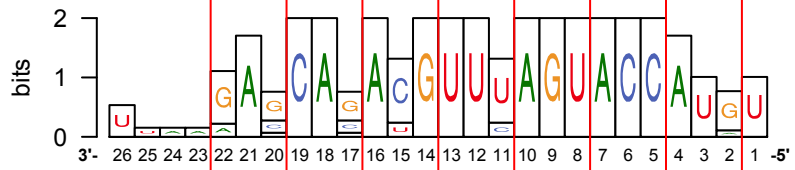

- Cl\_ccm\_2
- Cl\_ccm\_98
- Cl\_ccm\_438
- Cl\_ccm\_614
- Cl\_ccm\_13108
- Cl\_ccm\_51538
- Cl\_cpe-2015\_7
- Cl\_cpe-2015\_526
- Cl\_cpe-2017\_11
- Cl\_cpe-2017\_486
- Cl\_cpe-2017\_29015

|   |   |   |   |   |   |   |   |   |   |   |   |   |   |   |   |   |   |   |   |   |   |   |   |   |   |
|---|---|---|---|---|---|---|---|---|---|---|---|---|---|---|---|---|---|---|---|---|---|---|---|---|---|
| - | - | - | - | G | A | G | C | A | G | A | U | G | U | U | U | A | G | U | A | C | C | A | U | G | U |
| U | - | - | - | G | A | G | C | A | G | A | U | G | U | U | U | A | G | U | A | C | C | A | - | - | - |
| - | - | - | - | A | A | U | C | A | C | A | C | G | U | U | C | A | G | U | A | C | C | A | U | G | U |
| - | - | - | - | A | A | C | C | A | U | A | C | G | U | U | U | A | G | U | A | C | C | A | U | G | U |
| - | - | - | - | G | A | C | C | A | C | A | C | G | U | U | C | A | G | U | A | C | C | A | U | G | U |
| - | - | - | - | - | - | C | C | A | C | A | C | G | U | U | C | A | G | U | A | C | C | A | U | G | U |
| - | - | - | - | G | A | G | C | A | G | A | C | G | U | U | U | A | G | U | A | C | C | A | U | G | U |
| U | - | - | - | G | A | G | C | A | G | A | C | G | U | U | U | A | G | U | A | C | C | A | - | - | - |
| U | U | A | A | G | A | G | C | A | G | A | C | G | U | U | U | A | G | U | A | C | C | A | - | - | - |

**Perc. ID**

|      |
|------|
| >80% |
| >60% |
| >40% |
| <40% |

**AT1G63910 - AtMYB103**

**36/36 homologs found in phytozome eudicots containing targetsite**

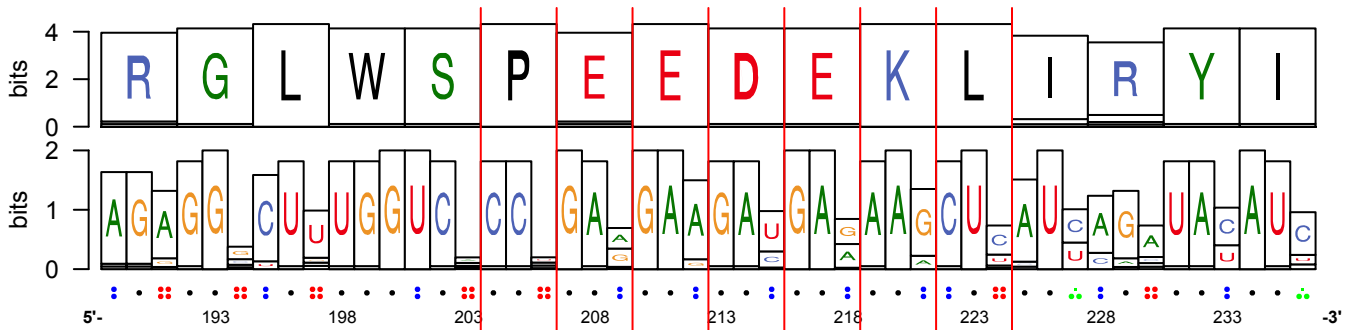

**SupFam\_37**

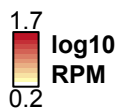

- Cl\_cgr-dp\_279
- Cl\_cgr-dp\_37384
- Cl\_cgr-pm\_1066
- Cl\_cgr-pm\_3376
- Cl\_cgr-pm\_4955
- Cl\_cgr-pm\_5111
- Cl\_cgr-mass\_287
- Cl\_cgr-mass\_2920
- Cl\_cgr-mass\_3016
- Cl\_cgr-mass\_4415

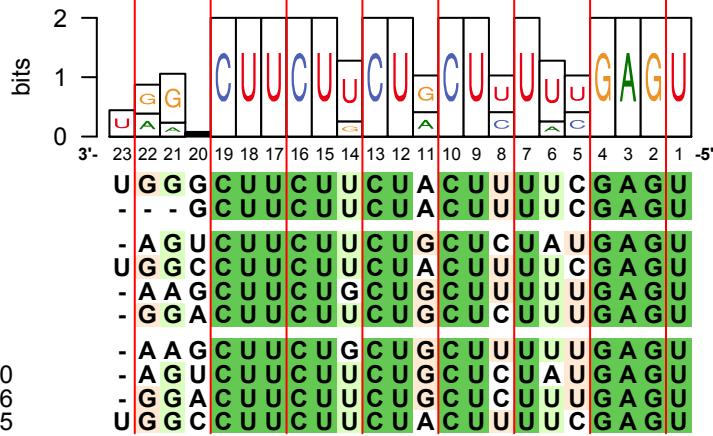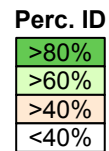



**AT1G65800 - RK2**

**35/36 homologs found in phytozome eudicots containing targetsite**

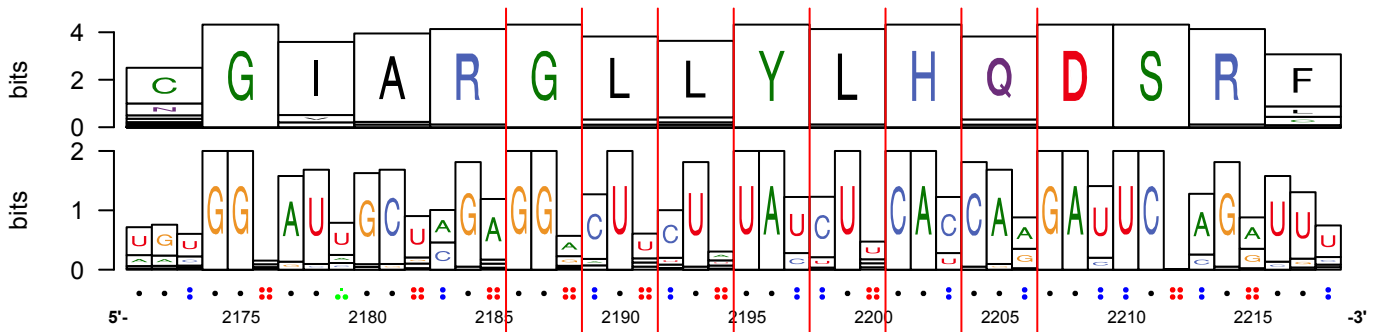

**SupFam\_49**

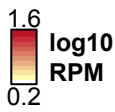

- Cl\_ccm\_1892
- Cl\_cpe-2015\_368
- Cl\_cpe-2017\_333
- Cl\_cgr-dp\_14631
- Cl\_cgr-pm\_329
- Cl\_cgr-pm\_652
- Cl\_cgr-pm\_1330
- Cl\_cgr-pm\_1915
- Cl\_cgr-pm\_8463
- Cl\_cgr-pm\_24876
- Cl\_cgr-mass\_861
- Cl\_cgr-mass\_1371
- Cl\_cgr-mass\_1911
- Cl\_cgr-mass\_3397
- Cl\_cgr-mass\_5064

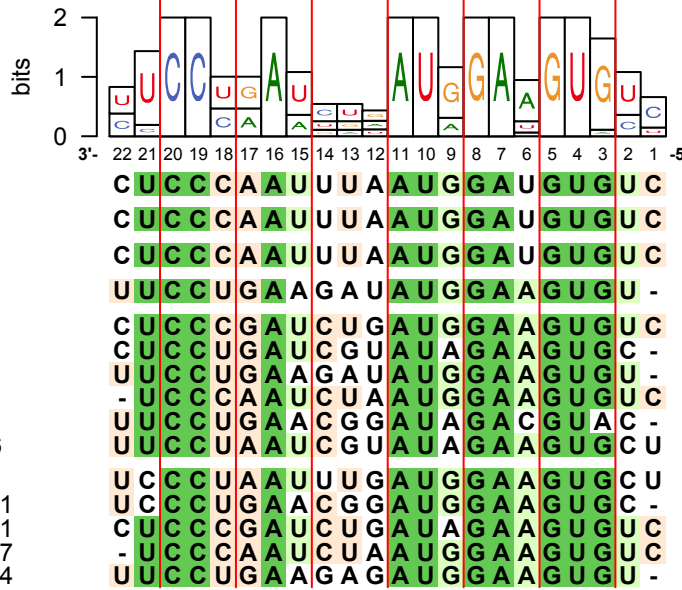

**Perc. ID**

- >80%
- >60%
- >40%
- <40%

AT2G39660 - BIK1

36/36 homologs found in phytozome eudicots containing targetsite

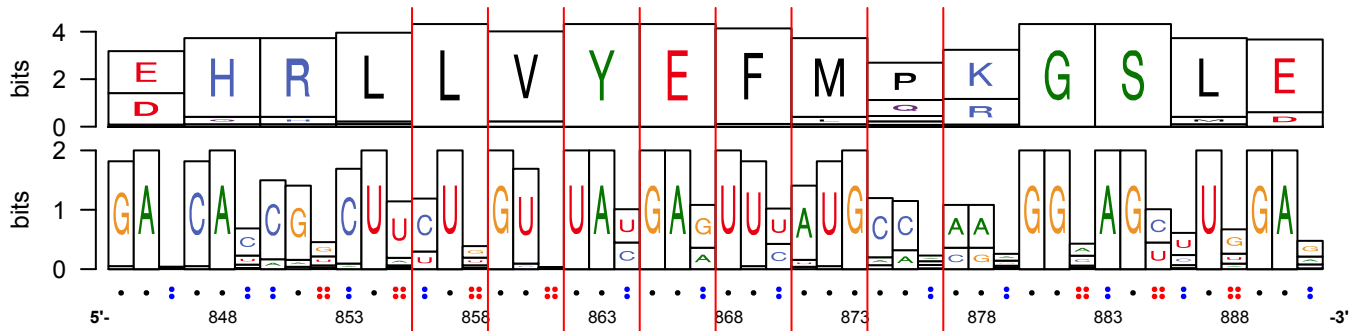

SupFam\_1

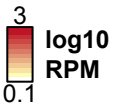

- Cl\_ccm\_7
- Cl\_ccm\_871
- Cl\_ccm\_4559
- Cl\_ccm\_7146
- Cl\_ccm\_27265
- Cl\_cpe-2015\_5
- Cl\_cpe-2015\_114
- Cl\_cpe-2015\_1077
- Cl\_cpe-2015\_2178
- Cl\_cpe-2015\_4852
- Cl\_cpe-2015\_20147
- Cl\_cpe-2017\_9
- Cl\_cpe-2017\_194
- Cl\_cpe-2017\_665
- Cl\_cpe-2017\_2071
- Cl\_cpe-2017\_5671
- Cl\_cpe-2017\_33377
- Cl\_cgr-pm\_271
- Cl\_cgr-pm\_808
- Cl\_cgr-pm\_1040
- Cl\_cgr-pm\_8755
- Cl\_cgr-pm\_35307
- Cl\_cgr-mass\_914
- Cl\_cgr-mass\_2085
- Cl\_cgr-mass\_7885

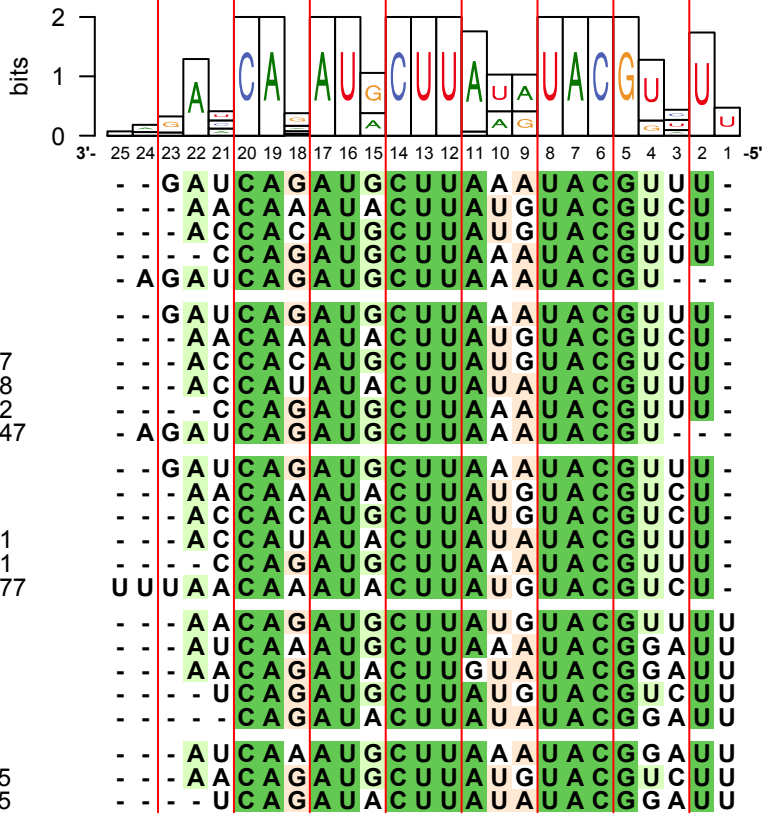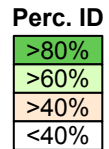

Supplement: elife-49750-supp7.pdf [file elife-49750-supp7.pdf]
