# Supplementary material for: Compensatory sequence variation between trans-species small RNAs and their target sites
Source: PubMed Central journal article supplement (PMC6917502; doi:10.7554/elife.49750), 2019-12-17

## Ran BP2

AT3G15680

Niben101Scf00349g01014

*ccm* on *nbe*

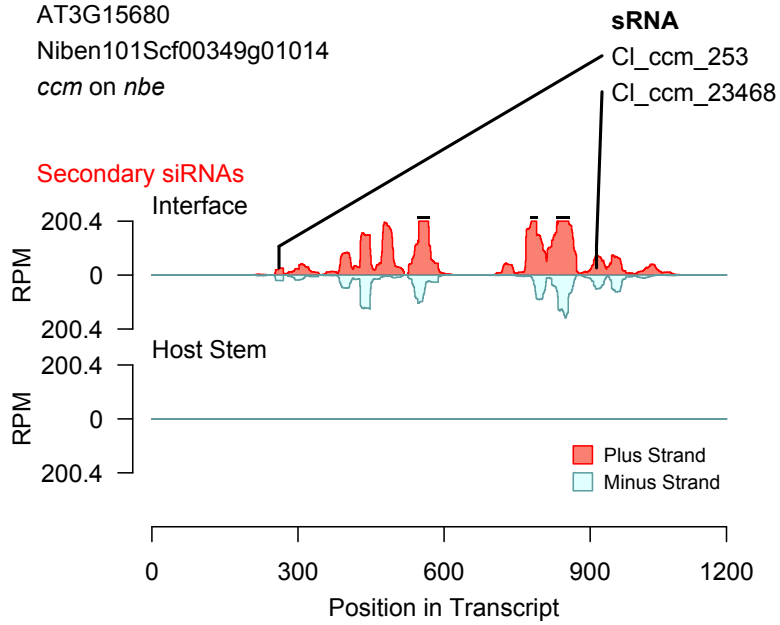

| AS  | tslice | phase | supfam | published_name |
|-----|--------|-------|--------|----------------|
| 1.5 | 261    | 9     | 11     | ccm-MIR12486*  |
| 5.5 | 913    | 10    |        |                |

2nd siRNAs: Phase diagram

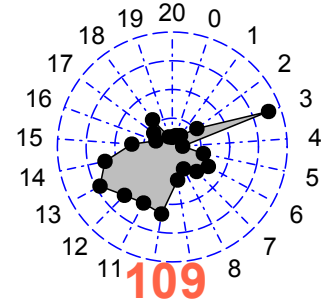

2nd siRNAs: Size distribution

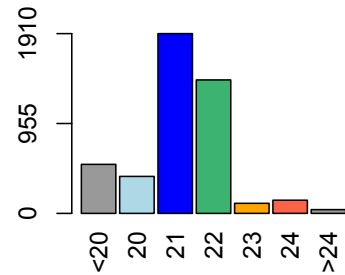

# EIL3

AT1G73730

Niben101Scf00761g07020

*ccm* on *nbe*

**sRNA**  
Cl\_ccm\_3720

| AS | tslice | phase | supfam | published_name |
|----|--------|-------|--------|----------------|
| 3  | 508    | 4     | 305    |                |

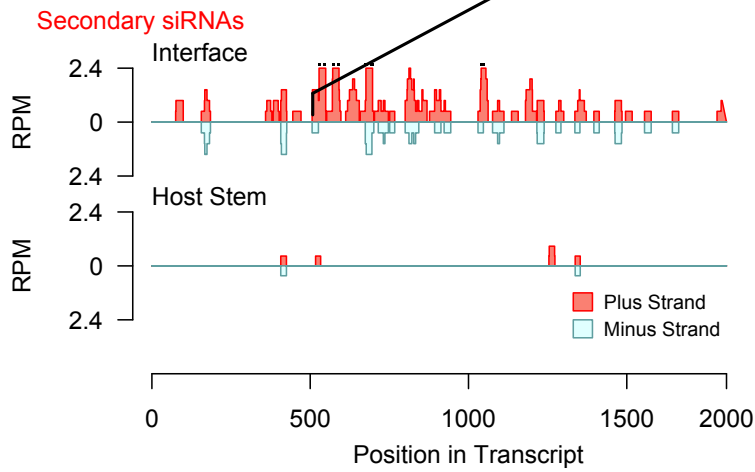

2nd siRNAs: Phase diagram

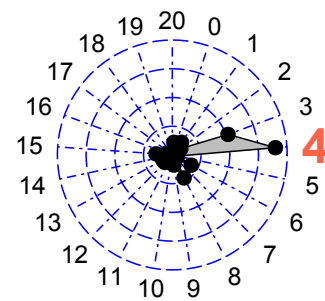

2nd siRNAs: Size distribution

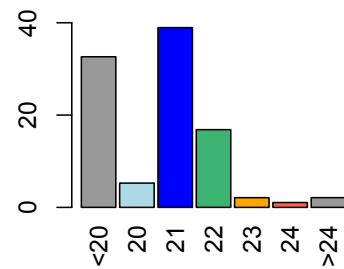

# TIR1

AT3G62980  
 Niben101Scf00823g01010  
*ccm* on *nbe*

**sRNA**  
 Cl\_ccm\_98  
 Cl\_ccm\_2  
 Cl\_ccm\_614

| AS  | tslice | phase | supfam | published_name |
|-----|--------|-------|--------|----------------|
| 3.5 | 119    | 14    | 27     |                |
| 3   | 122    | 17    | 27     | ccm-MIR12497a* |
| 5   | 122    | 17    | 27     | ccm-MIR12497b  |

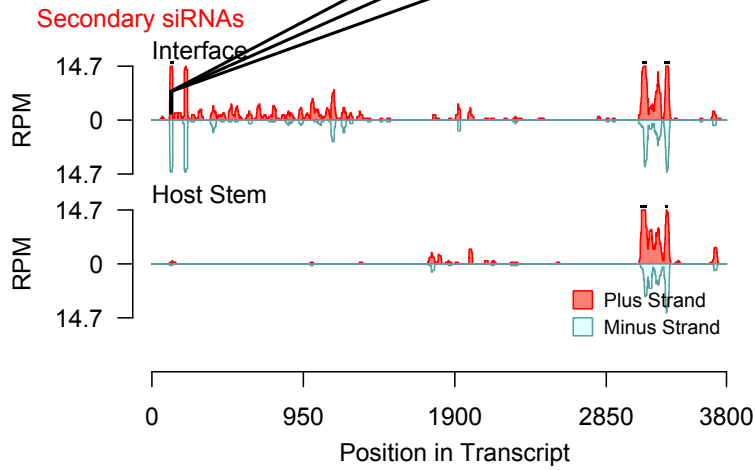

2nd siRNAs: Phase diagram

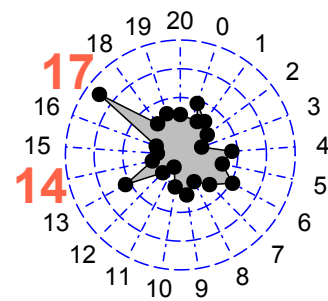

2nd siRNAs: Size distribution

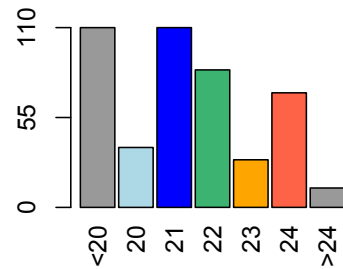

# BIK1

AT2G39660  
Niben101Scf01176g01025  
ccm on nbe

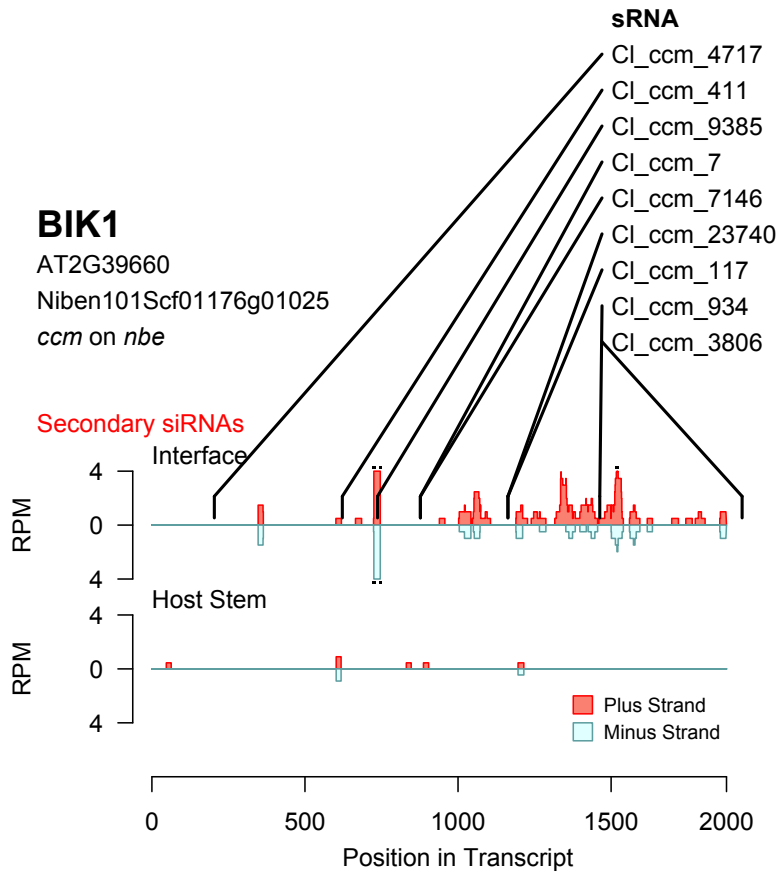

| sRNA         |
|--------------|
| Cl_ccm_4717  |
| Cl_ccm_411   |
| Cl_ccm_9385  |
| Cl_ccm_7     |
| Cl_ccm_7146  |
| Cl_ccm_23740 |
| Cl_ccm_117   |
| Cl_ccm_934   |
| Cl_ccm_3806  |

| AS  | tslice | phase | supfam | published_name |
|-----|--------|-------|--------|----------------|
| 3.5 | 204    | 15    | 310    | ccm-MIR12468*  |
| 5.5 | 622    | 13    | 26     |                |
| 1   | 737    | 2     | 320    |                |
| 2.5 | 877    | 16    | 1      | ccm-MIR12463b  |
| 2.5 | 877    | 16    | 1      |                |
| 4   | 1163   | 8     | 190    |                |
| 5   | 1163   | 8     | 190    |                |
| 5   | 1463   | 14    | 194    |                |
| 5   | 1928   | 17    | 306    | ccm-MIR12476b* |

2nd siRNAs: Phase diagram

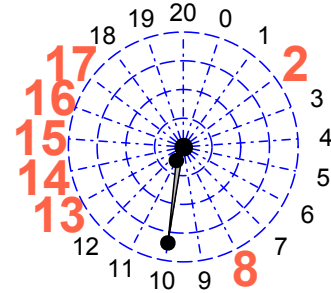

2nd siRNAs: Size distribution

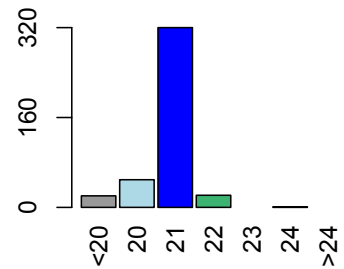

## Ran BP2

AT3G15680

Niben101Scf01620g02009

*ccm* on *nbe*

**sRNA**  
 Cl\_ccm\_253  
 Cl\_ccm\_23468

| AS  | tslice | phase | supfam | published_name |
|-----|--------|-------|--------|----------------|
| 2.5 | 257    | 5     | 11     | ccm-MIR12486*  |
| 5.5 | 663    | 12    |        |                |

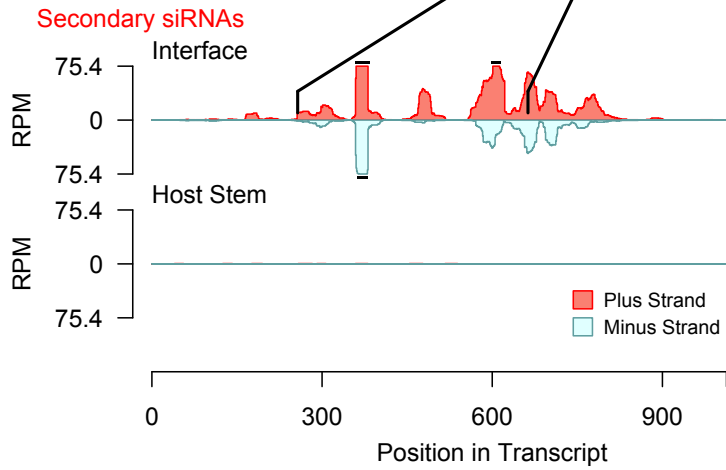

2nd siRNAs: Phase diagram

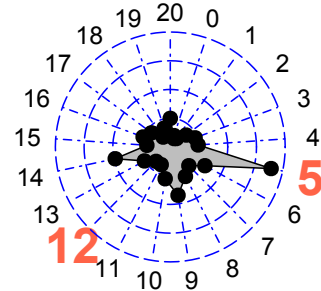

2nd siRNAs: Size distribution

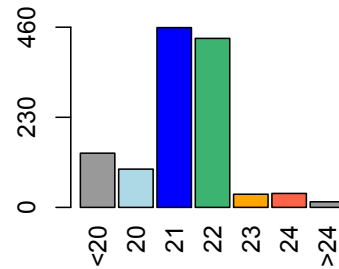

# TIR1

AT3G62980  
 Niben101Scf01642g03012  
*ccm* on *nbe*

**sRNA**

|              |
|--------------|
| CI_ccm_98    |
| CI_ccm_2     |
| CI_ccm_614   |
| CI_ccm_13108 |

| AS  | tslice | phase | supfam | published_name |
|-----|--------|-------|--------|----------------|
| 4.5 | 233    | 2     | 27     |                |
| 4   | 236    | 5     | 27     | ccm-MIR12497a* |
| 4.5 | 236    | 5     | 27     | ccm-MIR12497b  |
| 6   | 236    | 5     | 27     |                |

## Secondary siRNAs

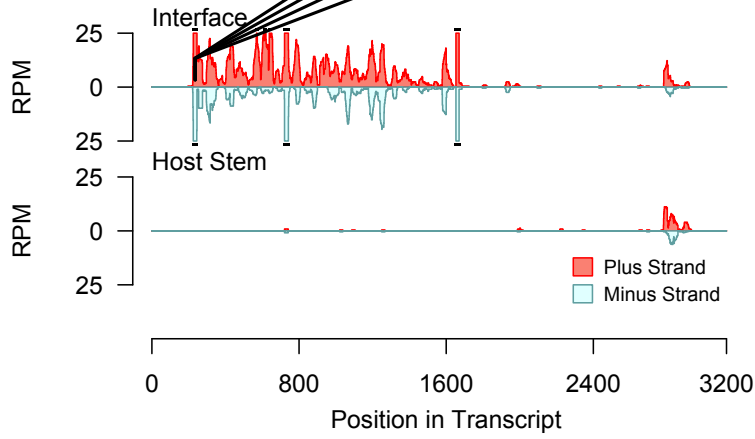

## 2nd siRNAs: Phase diagram

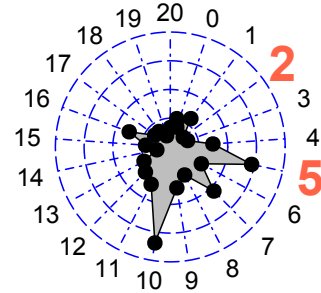

## 2nd siRNAs: Size distribution

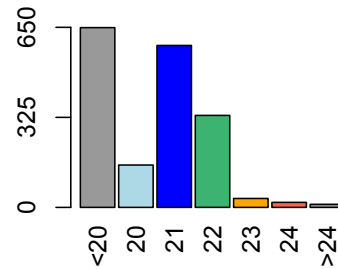

# jmj-family

AT5G46910

Niben101Scf01822g04006

*ccm* on *nbe*

**sRNA**

Cl\_ccm\_17830

| AS  | tslice | phase | supfam | published_name |
|-----|--------|-------|--------|----------------|
| 1.5 | 1053   | 3     | 329    |                |

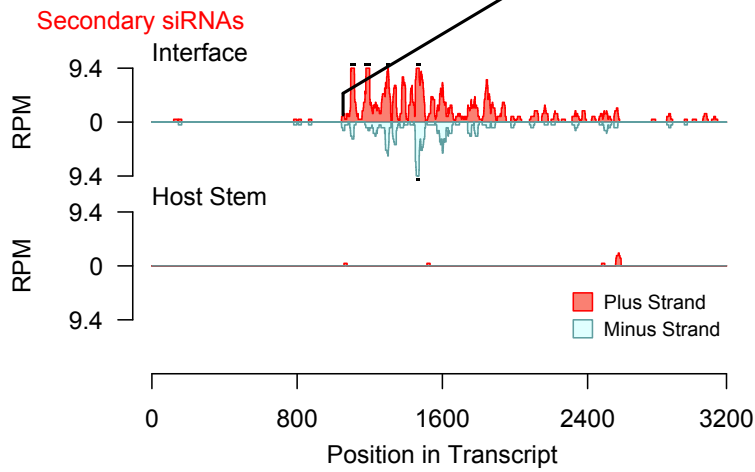

2nd siRNAs: Phase diagram

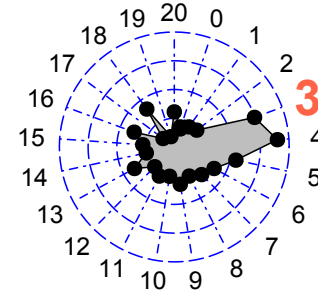

2nd siRNAs: Size distribution

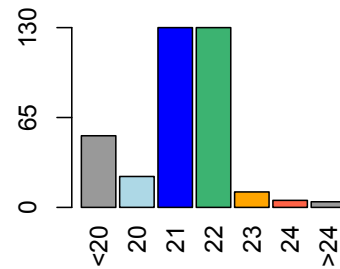

# TIR1

AT3G62980  
 Niben101Scf04271g03003  
*ccm* on *nbe*

**sRNA**  
 Cl\_ccm\_98  
 Cl\_ccm\_2  
 Cl\_ccm\_614

| AS  | tslice | phase | supfam | published_name |
|-----|--------|-------|--------|----------------|
| 3.5 | 275    | 2     | 27     |                |
| 3   | 278    | 5     | 27     | ccm-MIR12497a* |
| 5   | 278    | 5     | 27     | ccm-MIR12497b  |

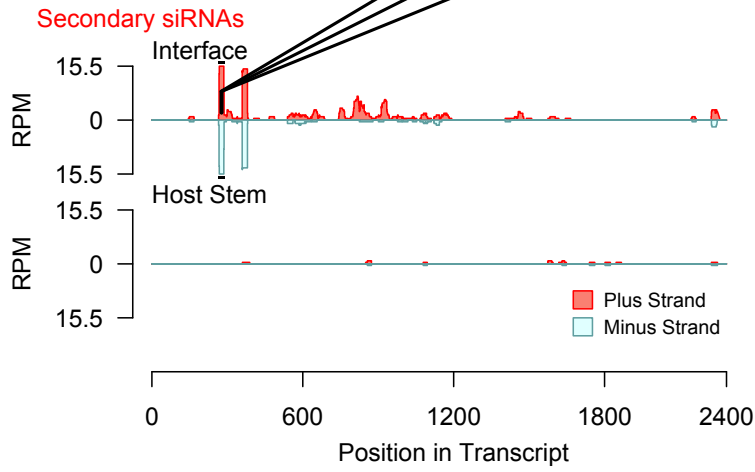

**2nd siRNAs: Phase diagram**

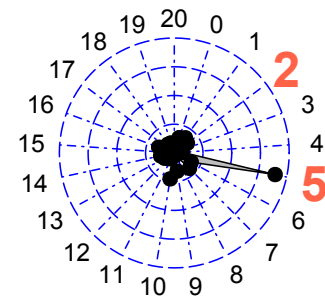

**2nd siRNAs: Size distribution**

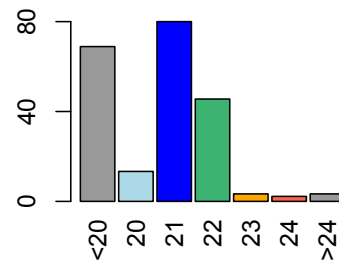



# BIK1

AT2G39660  
Niben101Scf04294g06004  
ccm on nbe

| sRNA         |
|--------------|
| CI_ccm_4717  |
| CI_ccm_411   |
| CI_ccm_9385  |
| CI_ccm_7     |
| CI_ccm_7146  |
| CI_ccm_23740 |
| CI_ccm_117   |
| CI_ccm_934   |

| AS  | tslice | phase | supfam | published_name |
|-----|--------|-------|--------|----------------|
| 3.5 | 134    | 8     | 310    | ccm-MIR12468*  |
| 5.5 | 544    | 19    | 26     |                |
| 1   | 659    | 8     | 320    |                |
| 2.5 | 799    | 1     | 1      | ccm-MIR12463b  |
| 2.5 | 799    | 1     | 1      |                |
| 4   | 1085   | 14    | 190    |                |
| 5   | 1085   | 14    | 190    |                |
| 5   | 1385   | 20    | 194    |                |

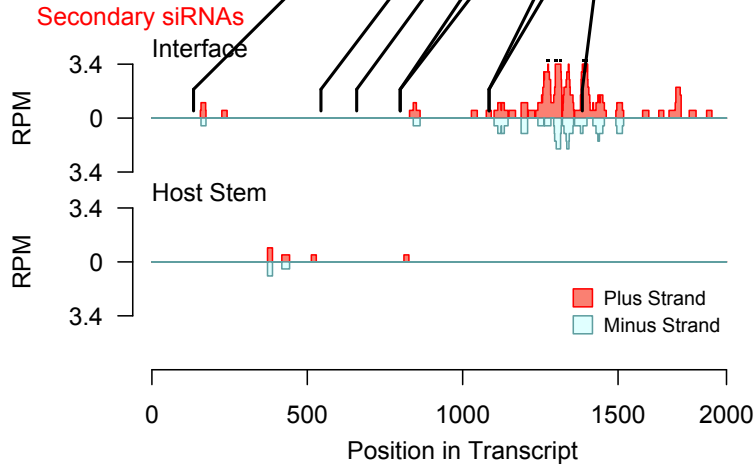

2nd siRNAs: Phase diagram

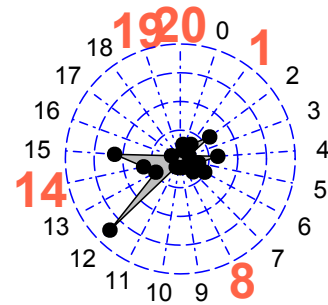

2nd siRNAs: Size distribution

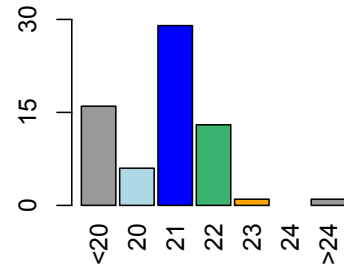

# GalOx

AT2G02870

Niben101Scf09578g00002

*ccm on nbe*

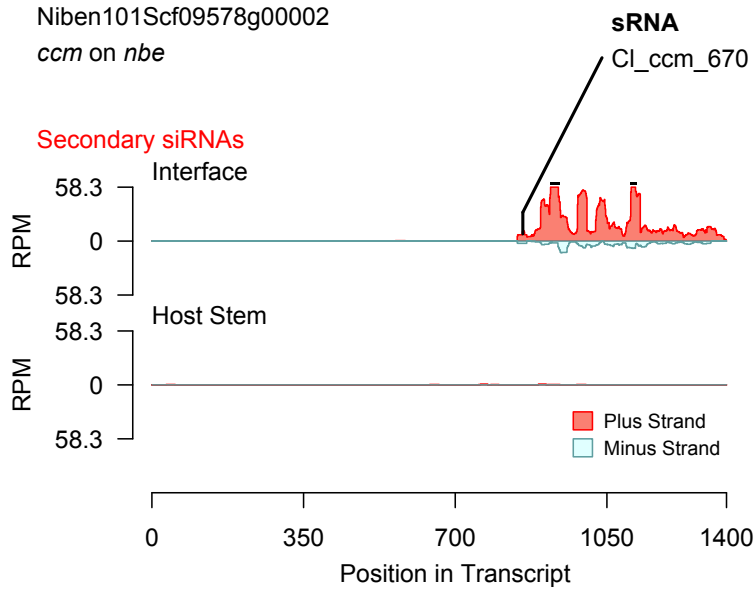

| AS | tslice | phase | supfam | published_name |
|----|--------|-------|--------|----------------|
| 2  | 856    | 16    | 281    |                |

2nd siRNAs: Phase diagram

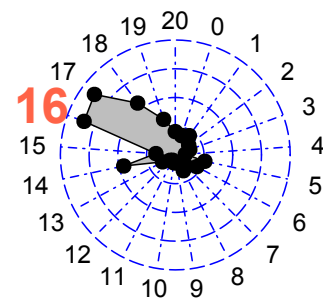

2nd siRNAs: Size distribution

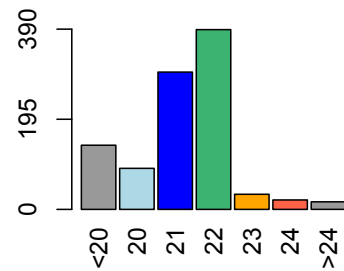

# Protein\_kinase

AT2G07180  
 Niben101Scf10157g01009  
 ccm on nbe

**sRNA**  
 Cl\_ccm\_391  
 Cl\_ccm\_23740

| AS  | tslice | phase | supfam | Published_name |
|-----|--------|-------|--------|----------------|
| 4.5 | 1098   | 6     | 123    |                |
| 5.5 | 1458   | 9     | 190    |                |

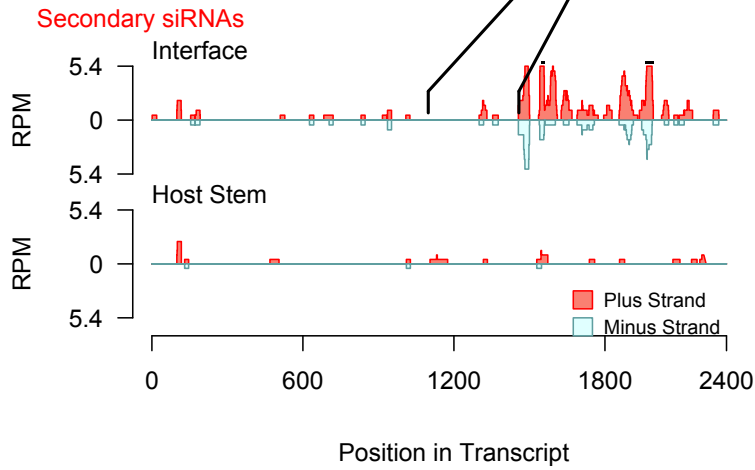

2nd siRNAs: Phase diagram

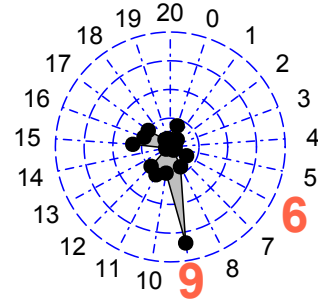

2nd siRNAs: Size distribution

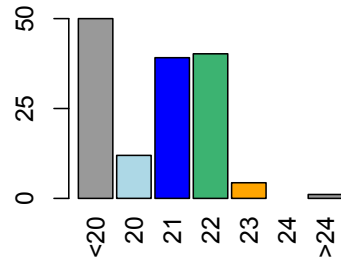

# Protein\_kinase

AT2G07180  
 Niben101Scf10157g01009  
 ccm on nbe

**sRNA**  
 Cl\_ccm\_391  
 Cl\_ccm\_23740

| AS  | tslice | phase | supfam | published_name |
|-----|--------|-------|--------|----------------|
| 4.5 | 1098   | 6     | 123    |                |
| 5.5 | 1458   | 9     | 190    |                |

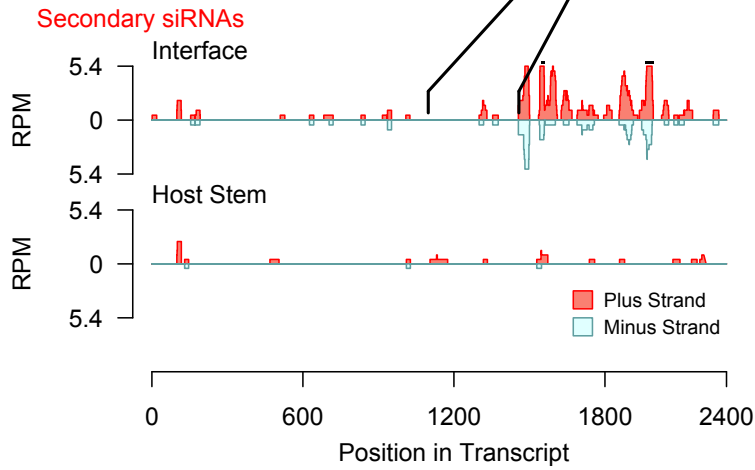

2nd siRNAs: Phase diagram

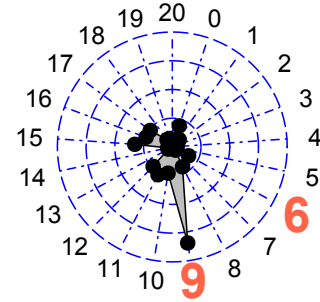

2nd siRNAs: Size distribution



Supplement: elife-49750-supp9.pdf [file elife-49750-supp9.pdf]
