# Supplementary material for: Compensatory sequence variation between trans-species small RNAs and their target sites
Source: PubMed Central journal article supplement (PMC6917502; doi:10.7554/elife.49750), 2019-12-17

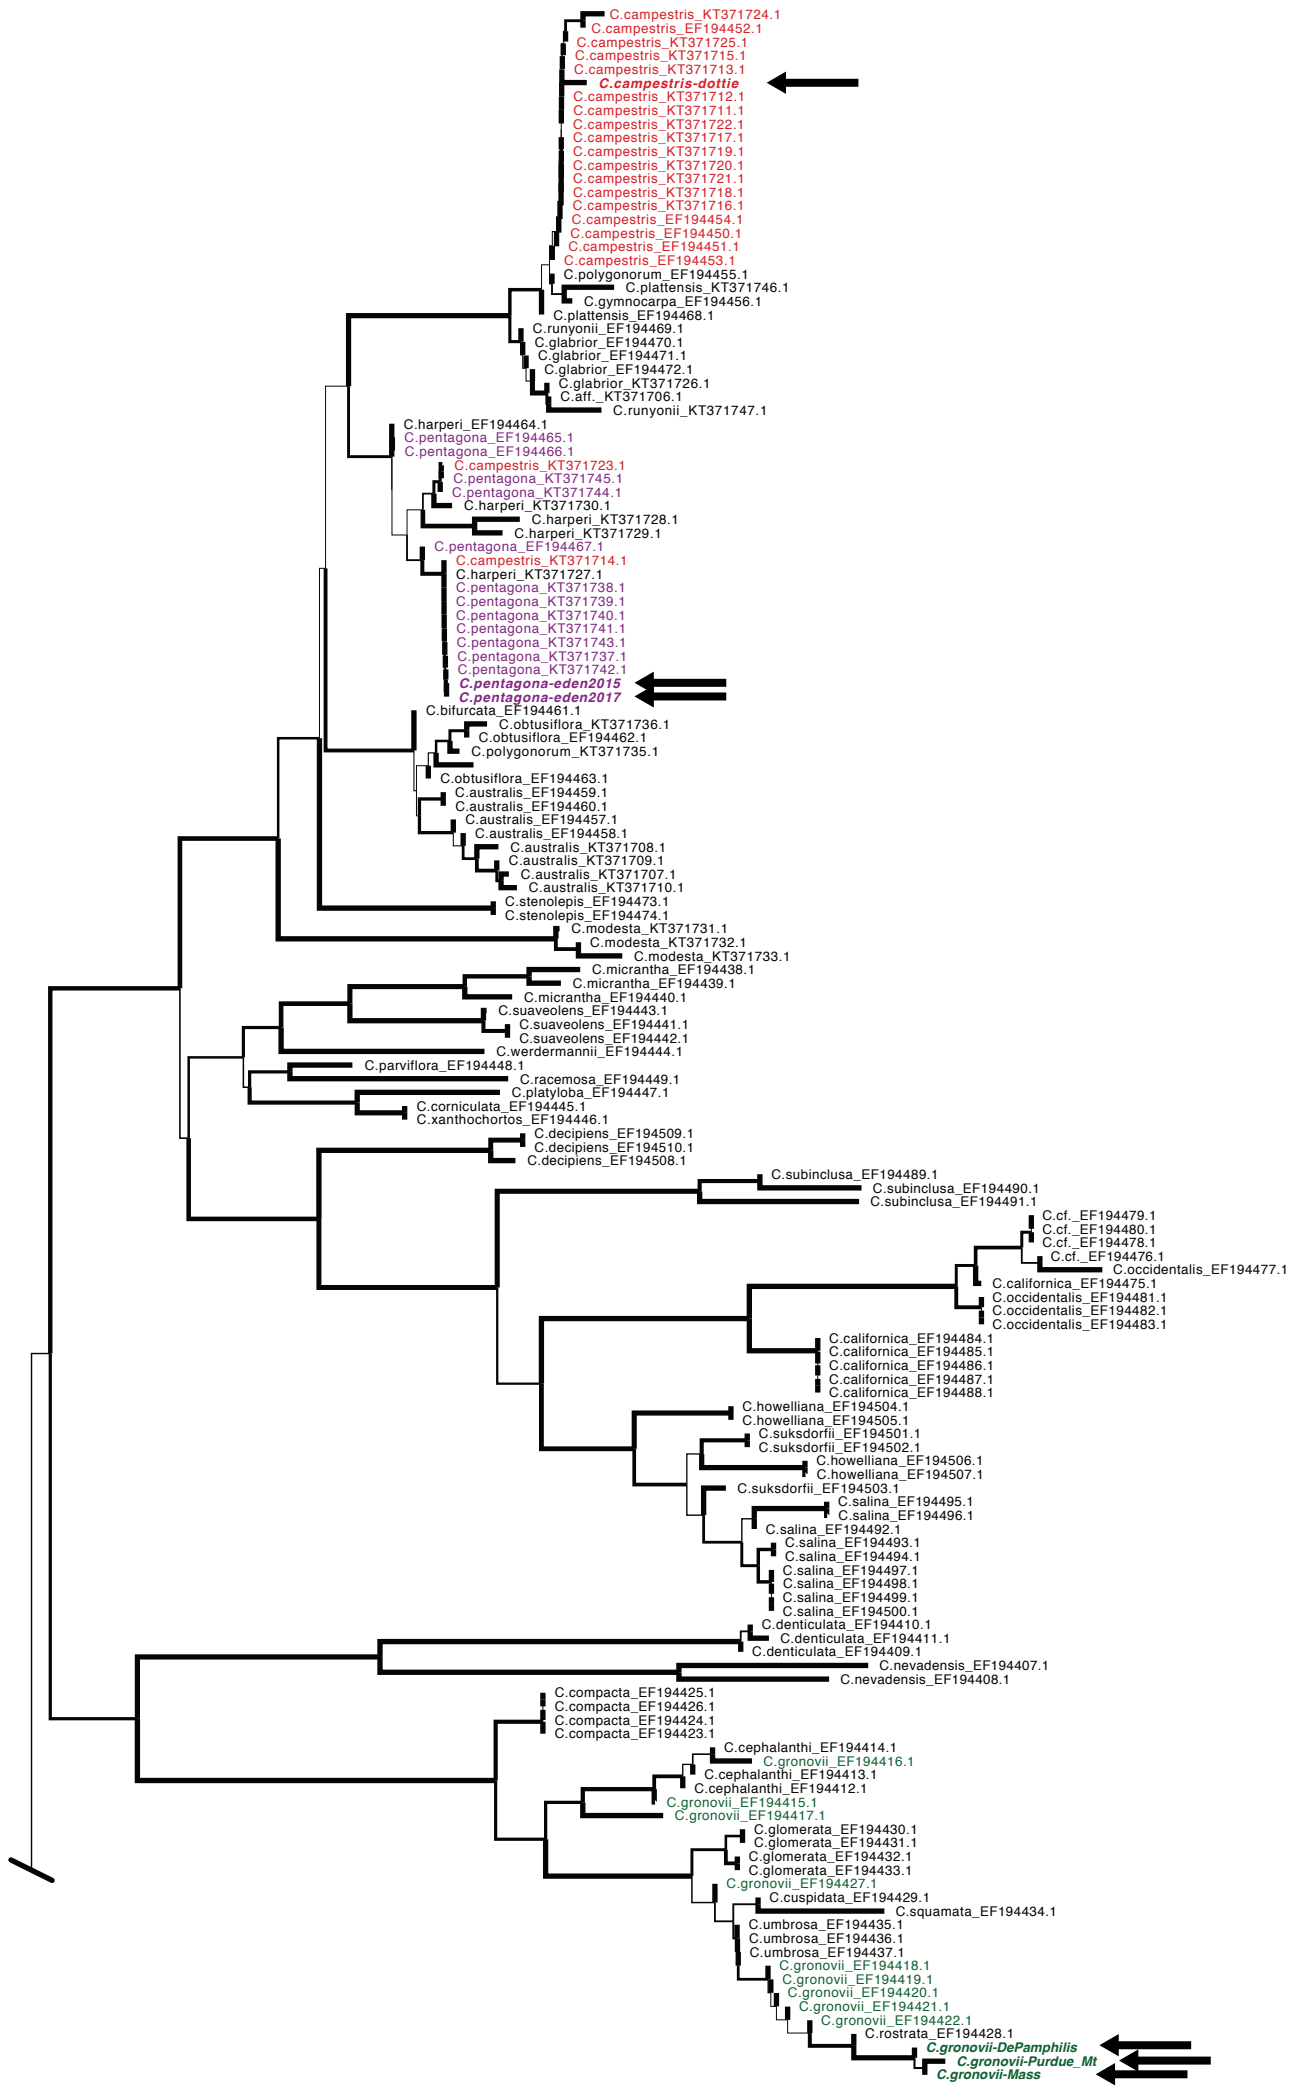

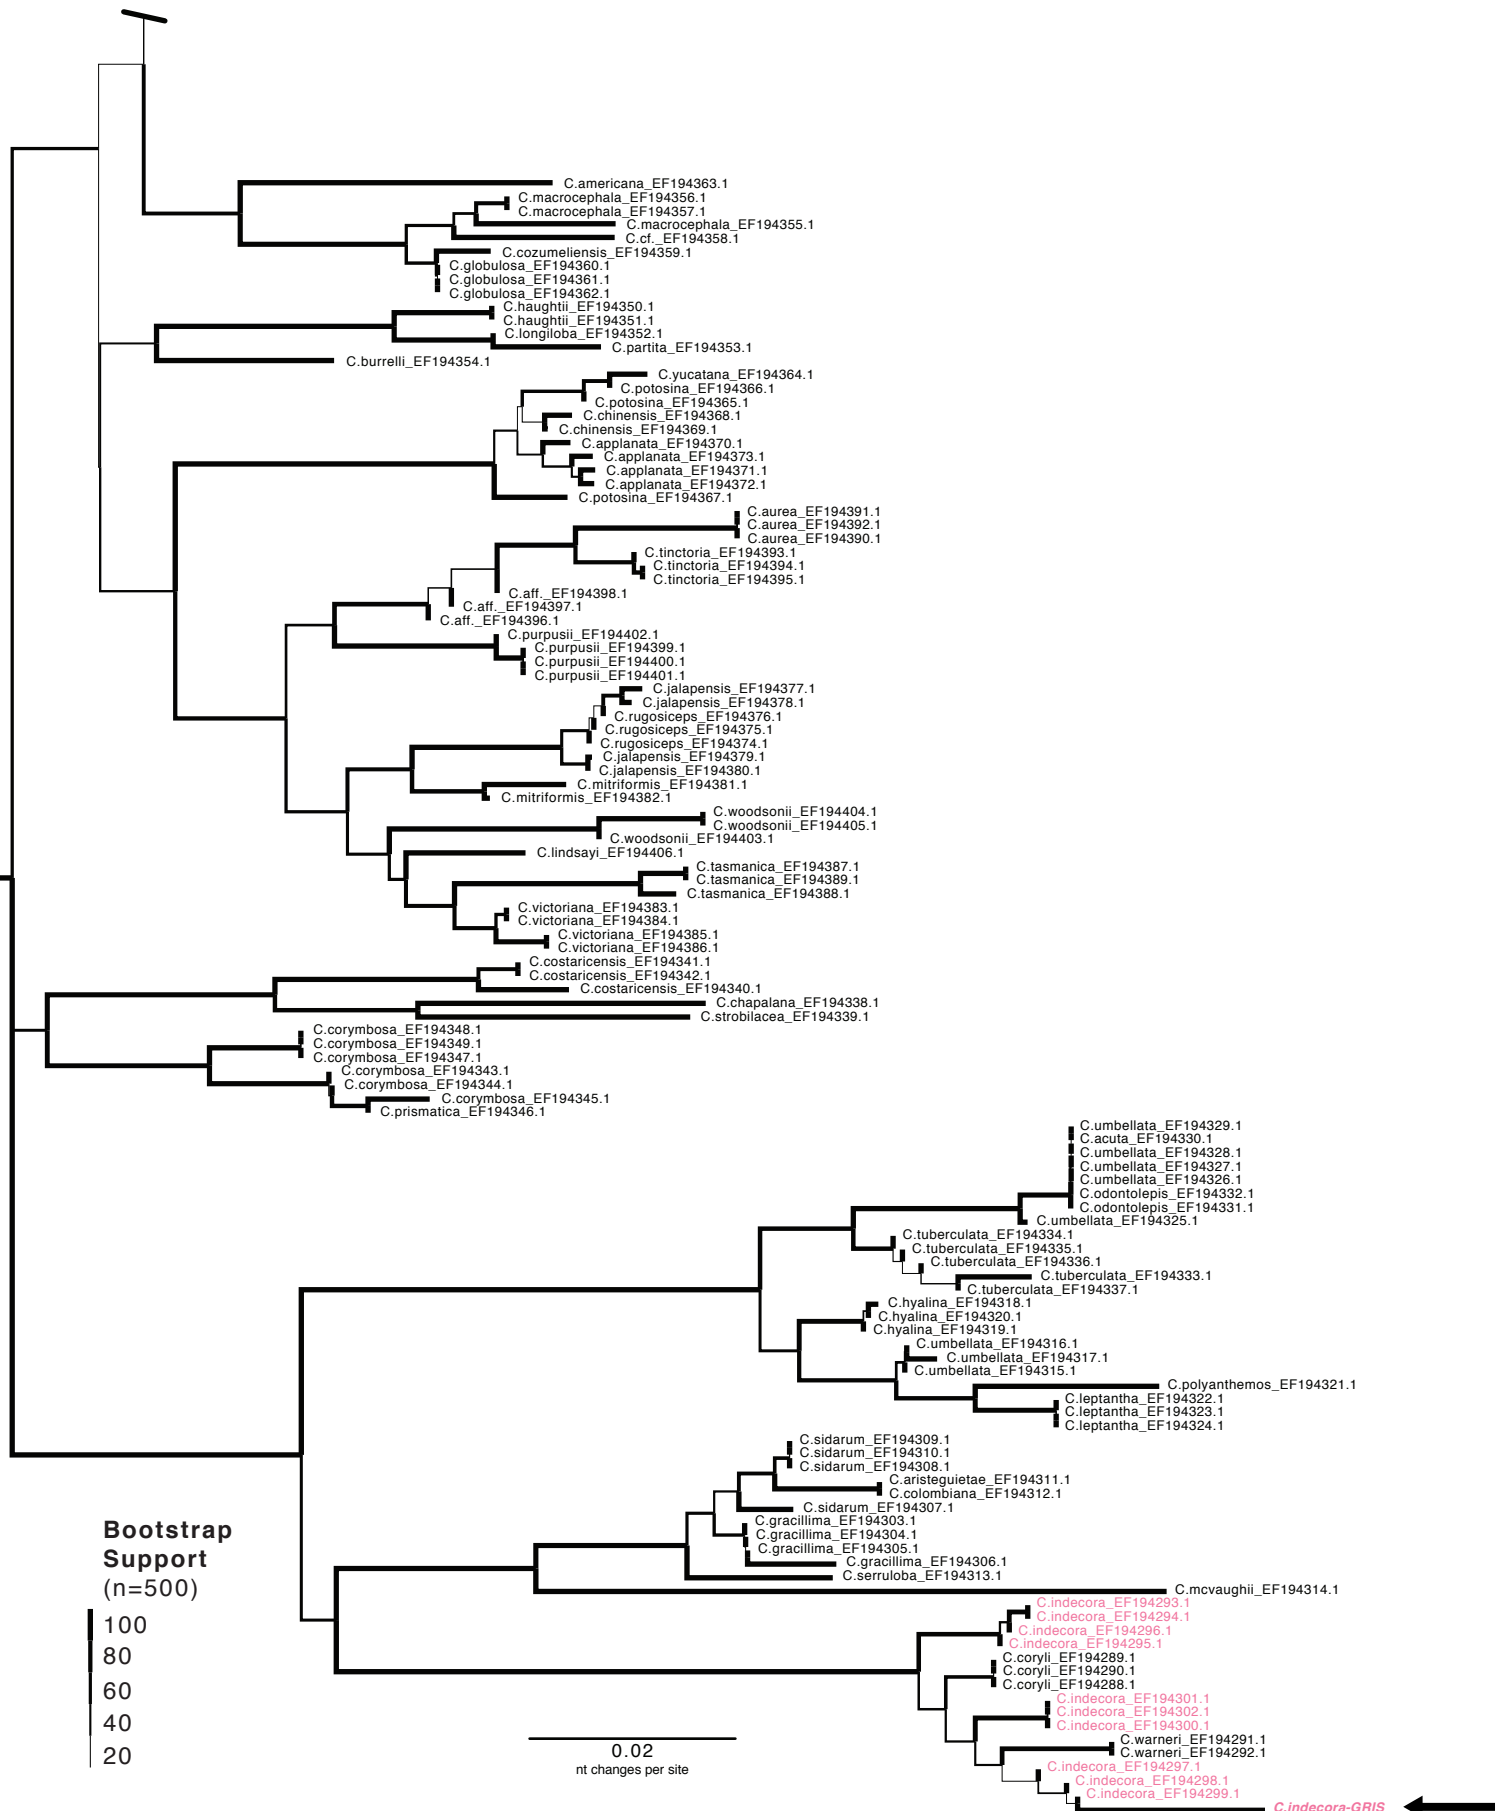

Supplement: elife-49750-supp1.pdf [file elife-49750-supp1.pdf]
