# Supplementary material for: Compensatory sequence variation between trans-species small RNAs and their target sites
Source: PubMed Central journal article supplement (PMC6917502; doi:10.7554/elife.49750), 2019-12-17
Supplement: elife-49750-supp11.pdf [file elife-49750-supp11.pdf]

Target count: 5

Best Allenscore

|     |           |        |
|-----|-----------|--------|
| 1.0 | AT2G46770 | NST1   |
| 3.0 | AT3G29035 | NAC3   |
| 1.0 | AT3G61910 | NAC066 |
| 3.0 | AT5G62380 | NAC101 |
| 3.0 | AT1G32770 | NAC012 |

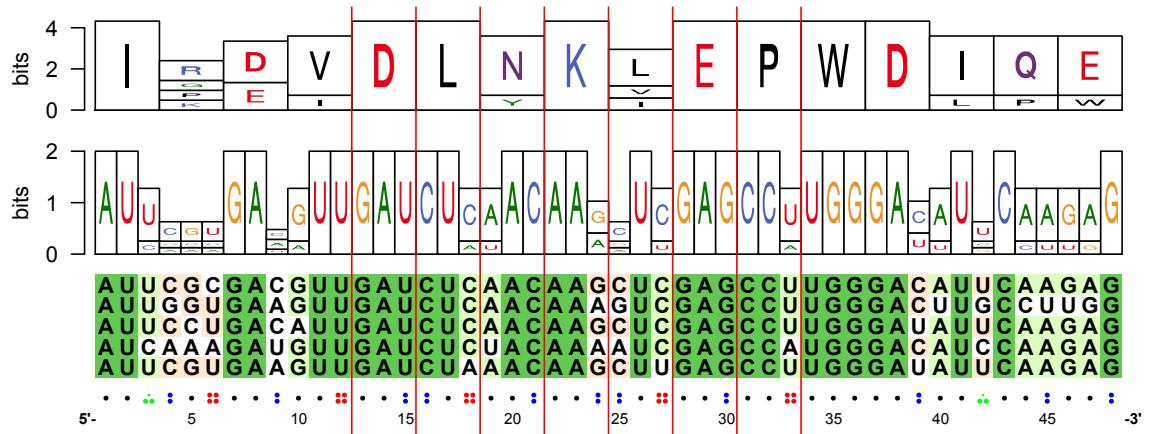

SupFam\_47

1.9  
log10  
RPM  
0

- Cl\_cgr-pm\_137
- Cl\_cgr-pm\_4699
- Cl\_cgr-pm\_6032
- Cl\_cgr-pm\_10999
- Cl\_cgr-mass\_627
- Cl\_cgr-mass\_2494
- Cl\_cgr-mass\_17756
- Cl\_cgr-mass\_37388

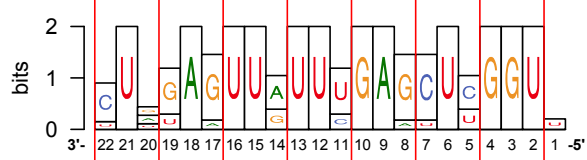

Perc. ID  
 >80%  
 >60%  
 >40%  
 <40%

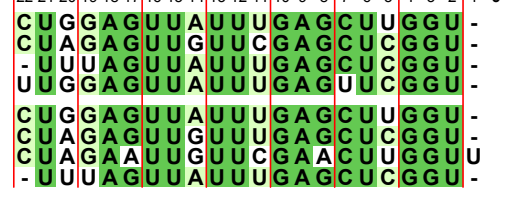

Target count: 5

Best Allenscore

- 1.0 AT5G38895 RING/U-box\_superf
- 1.0 AT5G41350 RING/U-box\_superf
- 1.0 AT1G69085 E3 ubiquitin-prot
- 2.0 AT3G02290 RING/U-box\_superf
- 1.0 AT5G15790 RING/U-box\_superf

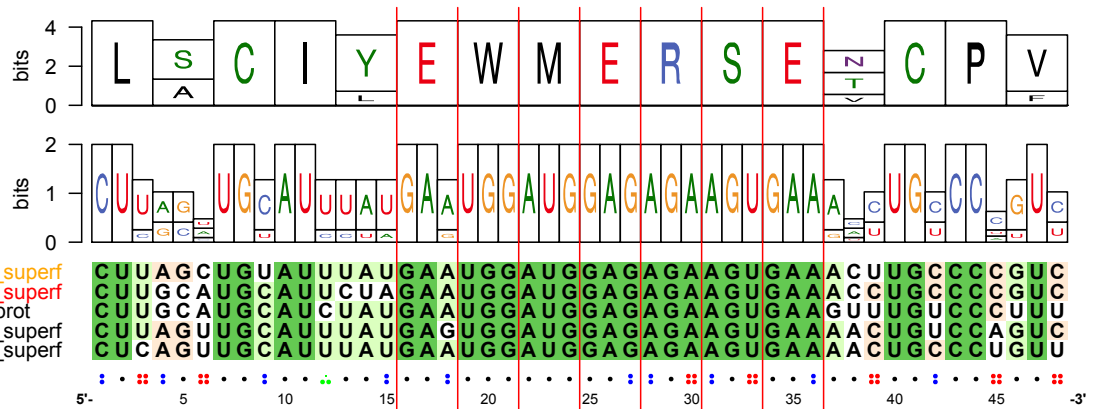

SupFam\_75

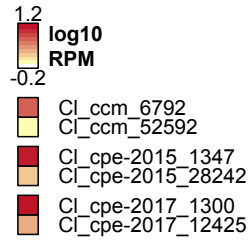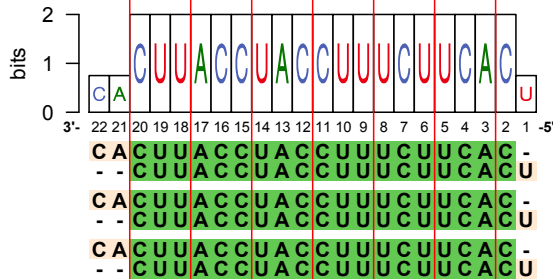

Perc. ID

- >80%
- >60%
- >40%
- <40%

Target count: 18

Best Allenscore

- 1.0 AT3G19700 IKU2
- 2.0 AT4G20270 BAM3
- 2.0 AT5G06740 Concanavalin\_A-li
- 3.0 AT3G42880 PRK3
- 3.0 AT5G60080 Protein\_kinase\_su
- 3.0 AT3G59700 HLECRK
- 2.0 AT3G53590 Leucine-rich\_repe
- 2.0 AT3G09830 Protein\_kinase\_su
- 2.0 AT1G24030 Protein\_kinase\_su
- 1.0 AT2G39660 BIK1
- 2.0 AT3G15890 Protein\_kinase\_su
- 2.0 AT4G21390 B120
- 2.0 AT4G27300 S-locus\_lectin\_pr
- 3.0 AT1G76360 Protein\_kinase\_su
- 2.0 AT4G23160 CRK8
- 2.0 AT4G23140 CRK6
- 0.0 AT3G20530 Protein\_kinase\_su
- 3.0 AT5G65700 BAM1

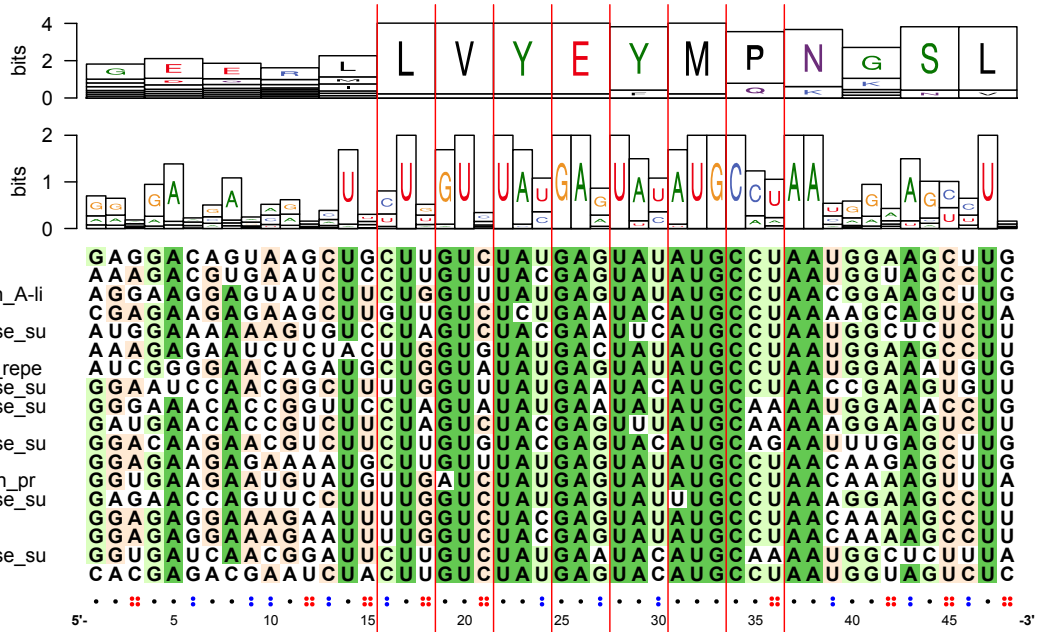

3  
log10  
RPM  
0.1

- Cl\_ccm\_7
- Cl\_ccm\_871
- Cl\_ccm\_4559
- Cl\_ccm\_7146
- Cl\_ccm\_27265
- Cl\_cpe-2015\_5
- Cl\_cpe-2015\_114
- Cl\_cpe-2015\_1077
- Cl\_cpe-2015\_2178
- Cl\_cpe-2015\_4852
- Cl\_cpe-2015\_20147
- Cl\_cpe-2017\_9
- Cl\_cpe-2017\_194
- Cl\_cpe-2017\_665
- Cl\_cpe-2017\_2071
- Cl\_cpe-2017\_5671
- Cl\_cpe-2017\_33377
- Cl\_cgr-pm\_271
- Cl\_cgr-pm\_808
- Cl\_cgr-pm\_1040
- Cl\_cgr-pm\_8755
- Cl\_cgr-pm\_35307
- Cl\_cgr-mass\_914
- Cl\_cgr-mass\_2085
- Cl\_cgr-mass\_7885

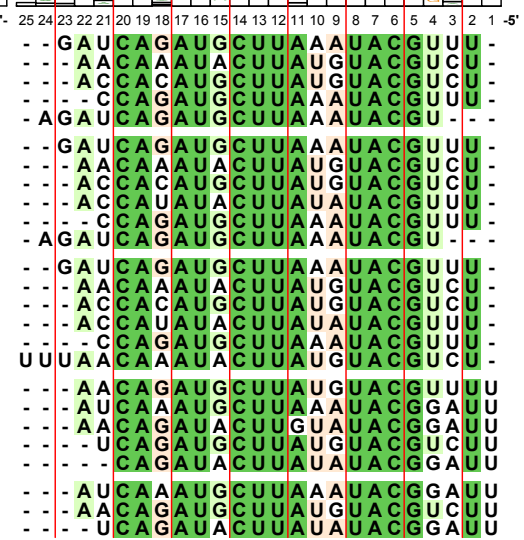

Perc. ID

- >80%
- >60%
- >40%
- <40%

Target count: 7

Best Allenscore

- 2.0 AT1G78970 LUP1
- 2.0 AT1G78960 LUP2
- 2.0 AT3G45130 LAS1
- 2.0 AT1G66960 LUP5
- 2.0 AT1G78955 CAMS1
- 1.0 AT2G07050 CAS1
- 2.0 AT1G78950 BAS

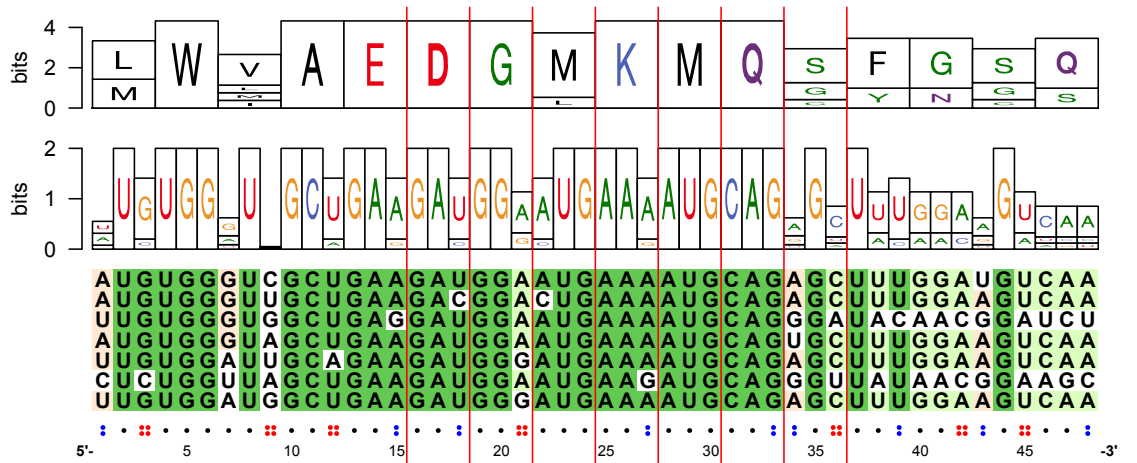

SupFam\_25

- 1.9 log10 RPM
- 0.1
- CI\_ccm\_2177
  - CI\_cpe-2015\_150
  - CI\_cpe-2015\_15012
  - CI\_cpe-2017\_186
  - CI\_cpe-2017\_17400
  - CI\_cgr-pm\_5848
  - CI\_cgr-pm\_10735
  - CI\_cgr-pm\_41013
  - CI\_cgr-mass\_1328
  - CI\_cgr-mass\_22564

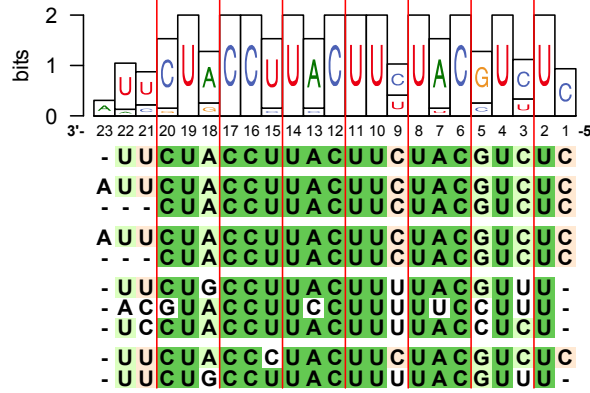

Perc. ID

- >80%
- >60%
- >40%
- <40%



Target count: 13

Best Allenscore

- 3.0 AT1G11330 S-locus\_lectin\_pr
- 2.0 AT1G61500 S-locus\_lectin\_pr
- 2.0 AT1G61440 S-locus\_lectin\_pr
- 3.0 AT3G45860 CRK4
- 2.0 AT4G11470 CRK31
- 3.0 AT4G23180 CRK10
- 2.0 AT1G53440 Leucine-rich\_repe
- 2.0 AT4G23260 CRK18
- 2.0 AT4G23250 EMB1290
- 2.0 AT4G11480 CRK32
- 3.0 AT3G51740 IMK2
- 3.0 AT4G23130 CRK5
- 2.0 AT5G40380 CRK42

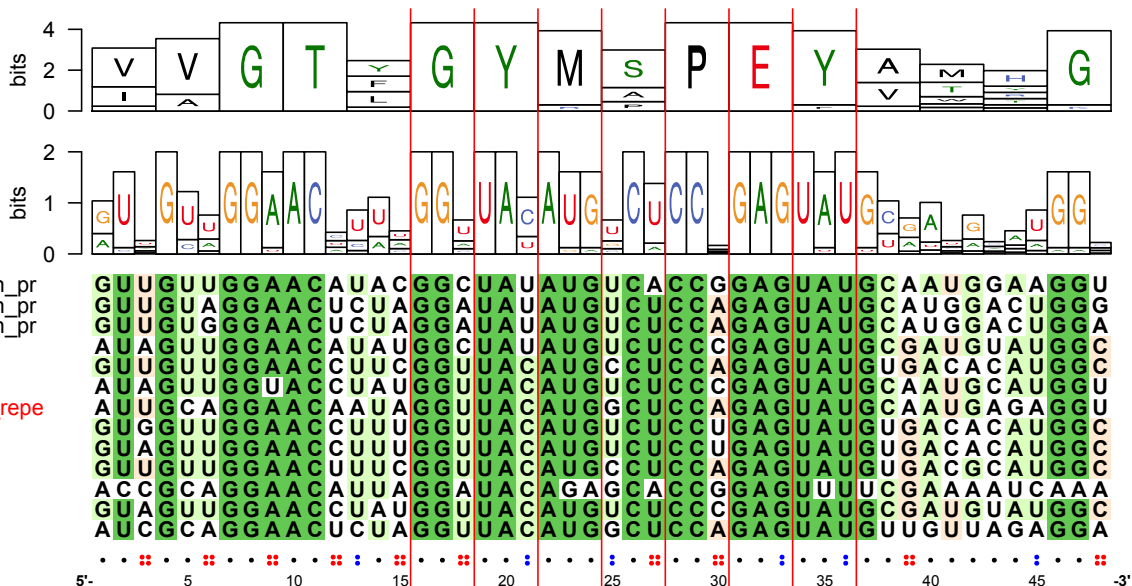

SupFam\_59

log10 RPM

1.4

0.2

- Cl\_cgr-pm\_346
- Cl\_cgr-pm\_4710
- Cl\_cgr-pm\_45586
- Cl\_cgr-mass\_517
- Cl\_cgr-mass\_750
- Cl\_cgr-mass\_2756
- Cl\_cgr-mass\_20246
- Cl\_cgr-mass\_31780

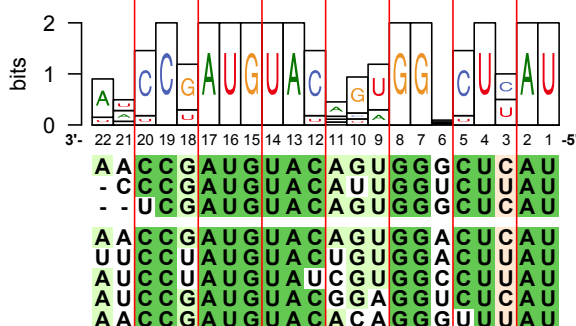

Perc. ID

- >80%
- >60%
- >40%
- <40%

Target count: 21

Best Allenscore

|     |           |                   |
|-----|-----------|-------------------|
| 2.0 | AT1G65790 | RK1               |
| 3.0 | AT1G25320 | Leucine-rich_repe |
| 2.0 | AT1G70530 | CRK3              |
| 3.0 | AT3G16030 | CES101            |
| 2.0 | AT1G65800 | RK2               |
| 2.0 | AT3G53590 | Leucine-rich_repe |
| 3.0 | AT1G10620 | PERK11            |
| 2.0 | AT3G07980 | MAPKKK6           |
| 3.0 | AT5G07180 | ERL2              |
| 3.0 | AT4G32710 | PERK14            |
| 2.0 | AT1G11300 | protein_serine/th |
| 1.0 | AT1G23540 | PERK12            |
| 2.0 | AT1G53420 | Leucine-rich_repe |
| 2.0 | AT5G01950 | Leucine-rich_repe |
| 3.0 | AT5G28680 | ANX2              |
| 2.0 | AT1G80640 | Protein_kinase_su |
| 2.0 | AT1G67520 | lectin_protein_ki |
| 2.0 | AT4G21380 | RK3               |
| 2.0 | AT4G28670 | Protein_kinase_fa |
| 3.0 | AT1G11330 | S-locus_lectin_pr |
| 2.0 | AT4G01330 | Protein_kinase_su |

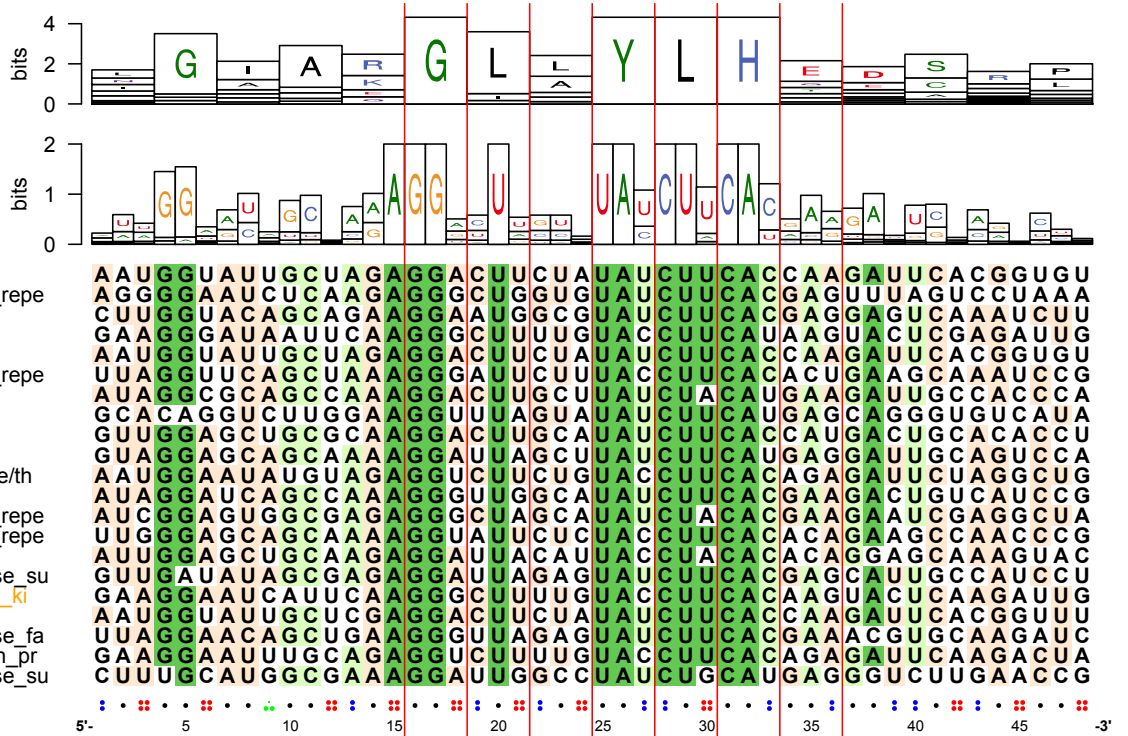

SupFam\_49

log10 RPM

- Cl\_ccm\_1892
- Cl\_cpe-2015\_368
- Cl\_cpe-2017\_333
- Cl\_cgr-dp\_14631
- Cl\_cgr-pm\_329
- Cl\_cgr-pm\_652
- Cl\_cgr-pm\_1330
- Cl\_cgr-pm\_1915
- Cl\_cgr-pm\_8463
- Cl\_cgr-pm\_24876
- Cl\_cgr-mass\_861
- Cl\_cgr-mass\_1371
- Cl\_cgr-mass\_1911
- Cl\_cgr-mass\_3397
- Cl\_cgr-mass\_5064

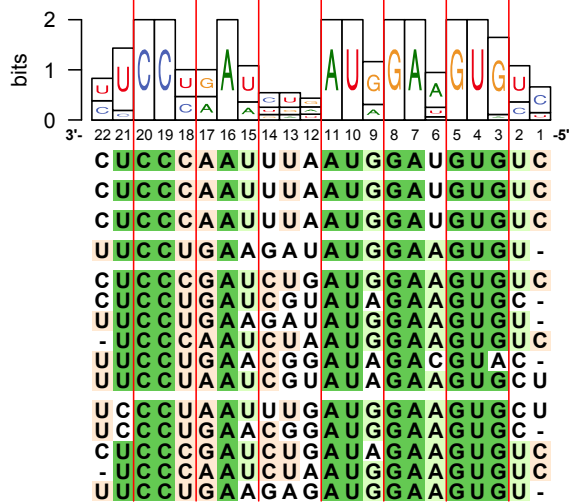

Perc. ID

- >80%
- >60%
- >40%
- <40%

Target count: 10

Best Allenscore

|     |           |          |
|-----|-----------|----------|
| 3.0 | AT5G57620 | MYB36    |
| 3.0 | AT5G54230 | MYB49    |
| 3.0 | AT5G52260 | MYB19    |
| 2.0 | AT1G63910 | AtMYB103 |
| 3.0 | AT5G26660 | MYB86    |
| 3.0 | AT4G17785 | MYB39    |
| 3.0 | AT1G57560 | MYB50    |
| 2.0 | AT3G48920 | MYB45    |
| 3.0 | AT1G09540 | MYB61    |
| 2.0 | AT3G13890 | MYB26    |

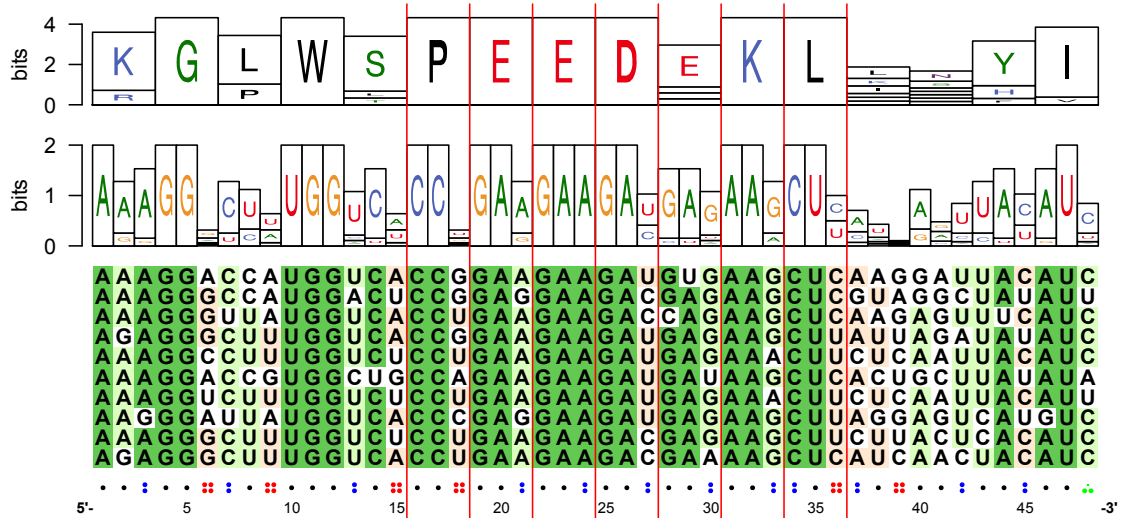

SupFam\_37

1.7  
log10  
RPM  
0.2

|   |                  |
|---|------------------|
| ■ | Cl_cgr-dp_279    |
| ■ | Cl_cgr-dp_37384  |
| ■ | Cl_cgr-pm_1066   |
| ■ | Cl_cgr-pm_3376   |
| ■ | Cl_cgr-pm_4955   |
| ■ | Cl_cgr-pm_5111   |
| ■ | Cl_cgr-mass_287  |
| ■ | Cl_cgr-mass_2920 |
| ■ | Cl_cgr-mass_3016 |
| ■ | Cl_cgr-mass_4415 |

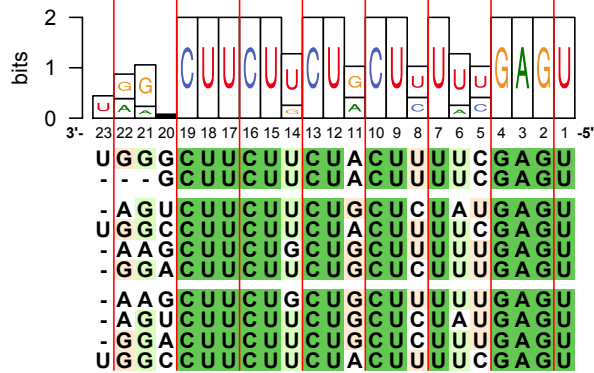

Perc. ID

|   |      |
|---|------|
| ■ | >80% |
| ■ | >60% |
| ■ | >40% |
| ■ | <40% |



Target count: 5

Best Allenscore

|     |           |                   |
|-----|-----------|-------------------|
| 3.0 | AT5G43470 | RPP8              |
| 3.0 | AT5G48620 | Disease_resistanc |
| 3.0 | AT1G51550 | Kelch_repeat-cont |
| 3.0 | AT5G35450 | Disease_resistanc |
| 3.0 | AT1G53350 | Disease_resistanc |

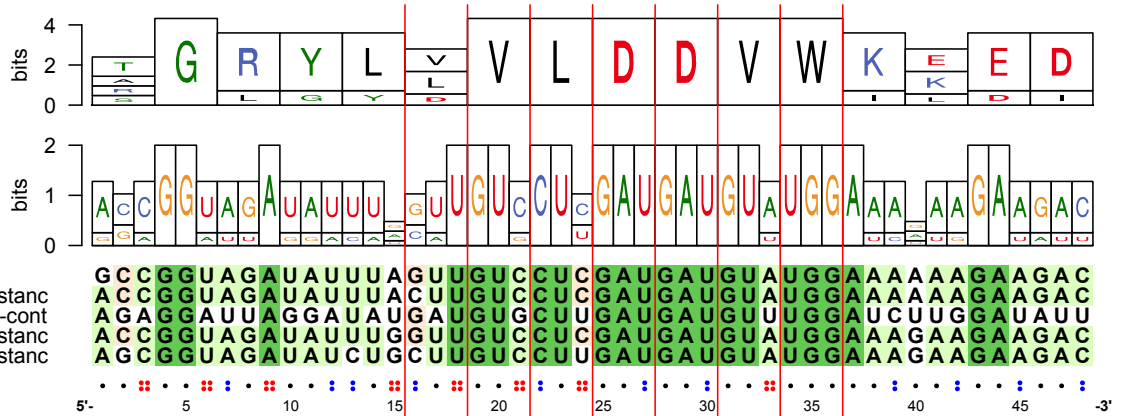

SupFam\_112

1.2  
log10  
RPM  
-0.3

- Cl\_cgr-dp\_478
- Cl\_cgr-pm\_1199
- Cl\_cgr-pm\_1323
- Cl\_cgr-pm\_5749
- Cl\_cgr-pm\_13751
- Cl\_cgr-pm\_37150
- Cl\_cgr-pm\_56897
- Cl\_cgr-mass\_6857

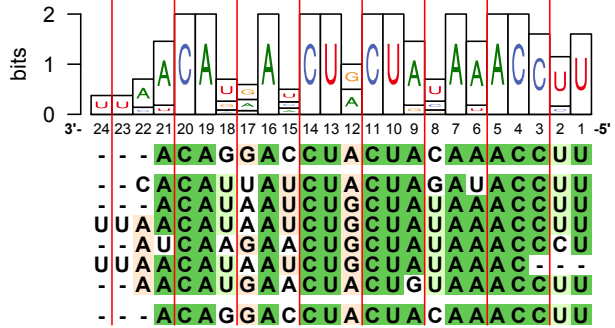

Perc. ID

|      |
|------|
| >80% |
| >60% |
| >40% |
| <40% |
