# Supplementary material for: Compensatory sequence variation between trans-species small RNAs and their target sites
Source: eLife. 2019 Dec 17;8:e49750. doi: 10.7554/eLife.49750 (PMC6917502; doi:10.7554/eLife.49750)
Supplement: Supplementary file 2. — All libraries are available under the SRA BioProject: PRJNA543296. Format: xlsx [file elife-49750-supp2.xlsx]

## Sheet: Sheet1
Supplemental file 2. List of all libraries and tissues prepared or used in this study
All libraries are available under the SRA BioProject: PRJNA543296
Reviewers can access these data via the following link: https://dataview.ncbi.nlm.nih.gov/object/PRJNA543296?reviewer=soo0k172je7opjn4h5ra1hr5qf
SRA accession	file_name	library_id	tissue_id	experiment	tissue	host	parasite_species	parasite isolate	parasite_origin	biological replicate
SRR9216091	1_sRNA_ccm_IN_rep1.fastq.gz	lib1_sRNA_ccm_IN_rep1	tissue1_ccm_IN_rep1	sRNA-seq	(IN) interface	A. thaliana (Col-0)	C. campestris	ccm	germinated seedling	rep_1
SRR9216090	2_sRNA_ccm_PS_rep1.fastq.gz	lib2_sRNA_ccm_PS_rep1	tissue2_ccm_PS_rep1	sRNA-seq	(PS) parasite stem	A. thaliana (Col-0)	C. campestris	ccm	germinated seedling	rep_1
SRR9216089	3_sRNA_ccm_IN_rep2.fastq.gz	lib3_sRNA_ccm_IN_rep2	tissue3_ccm_IN_rep2	sRNA-seq	(IN) interface	A. thaliana (Col-0)	C. campestris	ccm	germinated seedling	rep_2
SRR9216088	4_sRNA_ccm_PS_rep2.fastq.gz	lib4_sRNA_ccm_PS_rep2	tissue4_ccm_PS_rep2	sRNA-seq	(PS) parasite stem	A. thaliana (Col-0)	C. campestris	ccm	germinated seedling	rep_2
SRR9216087	5_sRNA_ccm_IN_rep3.fastq.gz	lib5_sRNA_ccm_IN_rep3	tissue5_ccm_IN_rep3	sRNA-seq	(IN) interface	A. thaliana (Col-0)	C. campestris	ccm	germinated seedling	rep_3
SRR9216086	6_sRNA_ccm_PS_rep3.fastq.gz	lib6_sRNA_ccm_PS_rep3	tissue6_ccm_PS_rep3	sRNA-seq	(PS) parasite stem	A. thaliana (Col-0)	C. campestris	ccm	germinated seedling	rep_3
SRR9216085	7_sRNA_cgr-dp_IN_rep1.fastq.gz	lib7_sRNA_cgr-dp_IN_rep1	tissue7_cgr-dp_IN_rep1	sRNA-seq	(IN) interface	A. thaliana (Col-0)	C. gronovii	cgr-dp	germinated seedling	rep_1
SRR9216084	8_sRNA_cgr-dp_PS_rep1.fastq.gz	lib8_sRNA_cgr-dp_PS_rep1	tissue8_cgr-dp_PS_rep1	sRNA-seq	(PS) parasite stem	A. thaliana (Col-0)	C. gronovii	cgr-dp	germinated seedling	rep_1
SRR9216092	9_sRNA_cgr-dp_IN_rep2.fastq.gz	lib9_sRNA_cgr-dp_IN_rep2	tissue9_cgr-dp_IN_rep2	sRNA-seq	(IN) interface	A. thaliana (Col-0)	C. gronovii	cgr-dp	germinated seedling	rep_2
SRR9216112	10_sRNA_cgr-dp_PS_rep2.fastq.gz	lib10_sRNA_cgr-dp_PS_rep2	tissue10_cgr-dp_PS_rep2	sRNA-seq	(PS) parasite stem	A. thaliana (Col-0)	C. gronovii	cgr-dp	germinated seedling	rep_2
SRR9216081	11_sRNA_cgr-dp_IN_rep3.fastq.gz	lib11_sRNA_cgr-dp_IN_rep3	tissue11_cgr-dp_IN_rep3	sRNA-seq	(IN) interface	A. thaliana (Col-0)	C. gronovii	cgr-dp	germinated seedling	rep_3
SRR9216080	12_sRNA_cgr-dp_PS_rep3.fastq.gz	lib12_sRNA_cgr-dp_PS_rep3	tissue12_cgr-dp_PS_rep3	sRNA-seq	(PS) parasite stem	A. thaliana (Col-0)	C. gronovii	cgr-dp	germinated seedling	rep_3
SRR9216083	13_sRNA_cgr-pm_IN_rep1.fastq.gz	lib13_sRNA_cgr-pm_IN_rep1	tissue13_cgr-pm_IN_rep1	sRNA-seq	(IN) interface	A. thaliana (Col-0)	C. gronovii	cgr-pm	germinated seedling	rep_1
SRR9216082	14_sRNA_cgr-pm_PS_rep1.fastq.gz	lib14_sRNA_cgr-pm_PS_rep1	tissue14_cgr-pm_PS_rep1	sRNA-seq	(PS) parasite stem	A. thaliana (Col-0)	C. gronovii	cgr-pm	germinated seedling	rep_1
SRR9216077	15_sRNA_cgr-pm_IN_rep2.fastq.gz	lib15_sRNA_cgr-pm_IN_rep2	tissue15_cgr-pm_IN_rep2	sRNA-seq	(IN) interface	A. thaliana (Col-0)	C. gronovii	cgr-pm	germinated seedling	rep_2
SRR9216076	16_sRNA_cgr-pm_PS_rep2.fastq.gz	lib16_sRNA_cgr-pm_PS_rep2	tissue16_cgr-pm_PS_rep2	sRNA-seq	(PS) parasite stem	A. thaliana (Col-0)	C. gronovii	cgr-pm	germinated seedling	rep_2
SRR9216079	17_sRNA_cgr-pm_IN_rep3.fastq.gz	lib17_sRNA_cgr-pm_IN_rep3	tissue17_cgr-pm_IN_rep3	sRNA-seq	(IN) interface	A. thaliana (Col-0)	C. gronovii	cgr-pm	germinated seedling	rep_3
SRR9216078	18_sRNA_cgr-pm_PS_rep3.fastq.gz	lib18_sRNA_cgr-pm_PS_rep3	tissue18_cgr-pm_PS_rep3	sRNA-seq	(PS) parasite stem	A. thaliana (Col-0)	C. gronovii	cgr-pm	germinated seedling	rep_3
SRR9216075	19_sRNA_cgr-mass_IN_rep1.fastq.gz	lib19_sRNA_cgr-mass_IN_rep1	tissue19_cgr-mass_IN_rep1	sRNA-seq	(IN) interface	A. thaliana (Col-0)	C. gronovii	cgr-mass	germinated seedling	rep_1
SRR9216074	20_sRNA_cgr-mass_PS_rep1.fastq.gz	lib20_sRNA_cgr-mass_PS_rep1	tissue20_cgr-mass_PS_rep1	sRNA-seq	(PS) parasite stem	A. thaliana (Col-0)	C. gronovii	cgr-mass	germinated seedling	rep_1
SRR9216057	21_sRNA_cgr-mass_IN_rep2.fastq.gz	lib21_sRNA_cgr-mass_IN_rep2	tissue21_cgr-mass_IN_rep2	sRNA-seq	(IN) interface	A. thaliana (Col-0)	C. gronovii	cgr-mass	germinated seedling	rep_2
SRR9216058	22_sRNA_cgr-mass_PS_rep2.fastq.gz	lib22_sRNA_cgr-mass_PS_rep2	tissue22_cgr-mass_PS_rep2	sRNA-seq	(PS) parasite stem	A. thaliana (Col-0)	C. gronovii	cgr-mass	germinated seedling	rep_2
SRR9216059	23_sRNA_cgr-mass_IN_rep3.fastq.gz	lib23_sRNA_cgr-mass_IN_rep3	tissue23_cgr-mass_IN_rep3	sRNA-seq	(IN) interface	A. thaliana (Col-0)	C. gronovii	cgr-mass	germinated seedling	rep_3
SRR9216060	24_sRNA_cgr-mass_PS_rep3.fastq.gz	lib24_sRNA_cgr-mass_PS_rep3	tissue24_cgr-mass_PS_rep3	sRNA-seq	(PS) parasite stem	A. thaliana (Col-0)	C. gronovii	cgr-mass	germinated seedling	rep_3
SRR9216061	25_sRNA_cpe-2015_IN_rep1.fastq.gz	lib25_sRNA_cpe-2015_IN_rep1	tissue25_cpe-2015_IN_rep1	sRNA-seq	(IN) interface	A. thaliana (Col-0)	C. pentagona	cpe-2015	germinated seedling	rep_1
SRR9216062	26_sRNA_cpe-2015_PS_rep1.fastq.gz	lib26_sRNA_cpe-2015_PS_rep1	tissue26_cpe-2015_PS_rep1	sRNA-seq	(PS) parasite stem	A. thaliana (Col-0)	C. pentagona	cpe-2015	germinated seedling	rep_1
SRR9216063	27_sRNA_cpe-2015_IN_rep2.fastq.gz	lib27_sRNA_cpe-2015_IN_rep2	tissue27_cpe-2015_IN_rep2	sRNA-seq	(IN) interface	A. thaliana (Col-0)	C. pentagona	cpe-2015	germinated seedling	rep_2
SRR9216064	28_sRNA_cpe-2015_PS_rep2.fastq.gz	lib28_sRNA_cpe-2015_PS_rep2	tissue28_cpe-2015_PS_rep2	sRNA-seq	(PS) parasite stem	A. thaliana (Col-0)	C. pentagona	cpe-2015	germinated seedling	rep_2
SRR9216065	29_sRNA_cpe-2015_IN_rep3.fastq.gz	lib29_sRNA_cpe-2015_IN_rep3	tissue29_cpe-2015_IN_rep3	sRNA-seq	(IN) interface	A. thaliana (Col-0)	C. pentagona	cpe-2015	germinated seedling	rep_3
SRR9216101	30_sRNA_cpe-2015_PS_rep3.fastq.gz	lib30_sRNA_cpe-2015_PS_rep3	tissue30_cpe-2015_PS_rep3	sRNA-seq	(PS) parasite stem	A. thaliana (Col-0)	C. pentagona	cpe-2015	germinated seedling	rep_3
SRR9216046	31_sRNA_cpe-2017_IN_rep1.fastq.gz	lib31_sRNA_cpe-2017_IN_rep1	tissue31_cpe-2017_IN_rep1	sRNA-seq	(IN) interface	A. thaliana (Col-0)	C. pentagona	cpe-2017	germinated seedling	rep_1
SRR9216045	32_sRNA_cpe-2017_PS_rep1.fastq.gz	lib32_sRNA_cpe-2017_PS_rep1	tissue32_cpe-2017_PS_rep1	sRNA-seq	(PS) parasite stem	A. thaliana (Col-0)	C. pentagona	cpe-2017	germinated seedling	rep_1
SRR9216044	33_sRNA_cpe-2017_IN_rep2.fastq.gz	lib33_sRNA_cpe-2017_IN_rep2	tissue33_cpe-2017_IN_rep2	sRNA-seq	(IN) interface	A. thaliana (Col-0)	C. pentagona	cpe-2017	germinated seedling	rep_2
SRR9216043	34_sRNA_cpe-2017_PS_rep2.fastq.gz	lib34_sRNA_cpe-2017_PS_rep2	tissue34_cpe-2017_PS_rep2	sRNA-seq	(PS) parasite stem	A. thaliana (Col-0)	C. pentagona	cpe-2017	germinated seedling	rep_2
SRR9216042	35_sRNA_cpe-2017_IN_rep3.fastq.gz	lib35_sRNA_cpe-2017_IN_rep3	tissue35_cpe-2017_IN_rep3	sRNA-seq	(IN) interface	A. thaliana (Col-0)	C. pentagona	cpe-2017	germinated seedling	rep_3
SRR9216041	36_sRNA_cpe-2017_PS_rep3.fastq.gz	lib36_sRNA_cpe-2017_PS_rep3	tissue36_cpe-2017_PS_rep3	sRNA-seq	(PS) parasite stem	A. thaliana (Col-0)	C. pentagona	cpe-2017	germinated seedling	rep_3
SRR9216040	37_sRNA_cin_IN_rep1.fastq.gz	lib37_sRNA_cin_IN_rep1	tissue37_cin_IN_rep1	sRNA-seq	(IN) interface	A. thaliana (Col-0)	C. indecora	cin	~5 cm tendril tip from adult plant	rep_1
SRR9216039	38_sRNA_cin_PS_rep1.fastq.gz	lib38_sRNA_cin_PS_rep1	tissue38_cin_PS_rep1	sRNA-seq	(PS) parasite stem	A. thaliana (Col-0)	C. indecora	cin	~5 cm tendril tip from adult plant	rep_1
SRR9216048	39_sRNA_cin_IN_rep2.fastq.gz	lib39_sRNA_cin_IN_rep2	tissue39_cin_IN_rep2	sRNA-seq	(IN) interface	A. thaliana (Col-0)	C. indecora	cin	~5 cm tendril tip from adult plant	rep_2
SRR9216047	40_sRNA_cin_PS_rep2.fastq.gz	lib40_sRNA_cin_PS_rep2	tissue40_cin_PS_rep2	sRNA-seq	(PS) parasite stem	A. thaliana (Col-0)	C. indecora	cin	~5 cm tendril tip from adult plant	rep_2
SRR9216095	41_sRNA_cin_IN_rep3.fastq.gz	lib41_sRNA_cin_IN_rep3	tissue41_cin_IN_rep3	sRNA-seq	(IN) interface	A. thaliana (Col-0)	C. indecora	cin	~5 cm tendril tip from adult plant	rep_3
SRR9216051	42_sRNA_cin_PS_rep3.fastq.gz	lib42_sRNA_cin_PS_rep3	tissue42_cin_PS_rep3	sRNA-seq	(PS) parasite stem	A. thaliana (Col-0)	C. indecora	cin	~5 cm tendril tip from adult plant	rep_3
SRR9216049	43_sRNA_ath_CS_rep1.fastq.gz	lib43_sRNA_ath_CS_rep1	tissue43_ath_CS_rep1	sRNA-seq	(CS) control, unparasitized stem	A. thaliana (Col-0)				rep_1
SRR9216050	44_sRNA_ath_CS_rep2.fastq.gz	lib44_sRNA_ath_CS_rep2	tissue44_ath_CS_rep2	sRNA-seq	(CS) control, unparasitized stem	A. thaliana (Col-0)				rep_2
SRR9216053	45_sRNA_ath_CS_rep3.fastq.gz	lib45_sRNA_ath_CS_rep3	tissue45_ath_CS_rep3	sRNA-seq	(CS) control, unparasitized stem	A. thaliana (Col-0)				rep_3
SRR9216054	46_PARE_ccm_HIN_rep1.fastq.gz	lib46_PARE_ccm_HIN_rep1	tissue46_ccm_HIN_rep1	NanoPARE	(HIN) host stem from interface	A. thaliana (xrn4)	C. campestris	ccm	germinated seedling	rep_1
SRR9216052	47_PARE_ccm_HIN_rep2.fastq.gz	lib47_PARE_ccm_HIN_rep2	tissue47_ccm_HIN_rep2	NanoPARE	(HIN) host stem from interface	A. thaliana (xrn4)	C. campestris	ccm	germinated seedling	rep_2
SRR9216098	48_PARE_ccm_HIN_rep3.fastq.gz	lib48_PARE_ccm_HIN_rep3	tissue48_ccm_HIN_rep3	NanoPARE	(HIN) host stem from interface	A. thaliana (xrn4)	C. campestris	ccm	germinated seedling	rep_3
SRR9216055	49_PARE_cgr-dp_HIN_rep1.fastq.gz	lib49_PARE_cgr-dp_HIN_rep1	tissue49_cgr-dp_HIN_rep1	NanoPARE	(HIN) host stem from interface	A. thaliana (xrn4)	C. gronovii	cgr-dp	germinated seedling	rep_1
SRR9216056	50_PARE_cgr-dp_HIN_rep2.fastq.gz	lib50_PARE_cgr-dp_HIN_rep2	tissue50_cgr-dp_HIN_rep2	NanoPARE	(HIN) host stem from interface	A. thaliana (xrn4)	C. gronovii	cgr-dp	germinated seedling	rep_2
SRR9216030	51_PARE_cgr-dp_HIN_rep3.fastq.gz	lib51_PARE_cgr-dp_HIN_rep3	tissue51_cgr-dp_HIN_rep3	NanoPARE	(HIN) host stem from interface	A. thaliana (xrn4)	C. gronovii	cgr-dp	germinated seedling	rep_3
SRR9216029	52_PARE_cpe-2015_HIN_rep1.fastq.gz	lib52_PARE_cpe-2015_HIN_rep1	tissue52_cpe-2015_HIN_rep1	NanoPARE	(HIN) host stem from interface	A. thaliana (xrn4)	C. pentagona	cpe-2015	germinated seedling	rep_1
SRR9216032	53_PARE_cpe-2015_HIN_rep2.fastq.gz	lib53_PARE_cpe-2015_HIN_rep2	tissue53_cpe-2015_HIN_rep2	NanoPARE	(HIN) host stem from interface	A. thaliana (xrn4)	C. pentagona	cpe-2015	germinated seedling	rep_2
SRR9216031	54_PARE_cpe-2015_HIN_rep3.fastq.gz	lib54_PARE_cpe-2015_HIN_rep3	tissue54_cpe-2015_HIN_rep3	NanoPARE	(HIN) host stem from interface	A. thaliana (xrn4)	C. pentagona	cpe-2015	germinated seedling	rep_3
SRR9216034	55_PARE_cin_HIN_rep1.fastq.gz	lib55_PARE_cin_HIN_rep1	tissue55_cin_HIN_rep1	NanoPARE	(HIN) host stem from interface	A. thaliana (xrn4)	C. indecora	cin	~5 cm tendril tip from adult plant	rep_1
SRR9216033	56_PARE_cin_HIN_rep2.fastq.gz	lib56_PARE_cin_HIN_rep2	tissue56_cin_HIN_rep2	NanoPARE	(HIN) host stem from interface	A. thaliana (xrn4)	C. indecora	cin	~5 cm tendril tip from adult plant	rep_2
SRR9216036	57_PARE_cin_HIN_rep3.fastq.gz	lib57_PARE_cin_HIN_rep3	tissue57_cin_HIN_rep3	NanoPARE	(HIN) host stem from interface	A. thaliana (xrn4)	C. indecora	cin	~5 cm tendril tip from adult plant	rep_3
SRR9216035	58_PARE_xrn4_CS_rep1.fastq.gz	lib58_PARE_xrn4_CS_rep1	tissue58_xrn4_CS_rep1	NanoPARE	(CS) control, unparasitized stem	A. thaliana (xrn4)				rep_1
SRR9216038	59_PARE_xrn4_CS_rep2.fastq.gz	lib59_PARE_xrn4_CS_rep2	tissue59_xrn4_CS_rep2	NanoPARE	(CS) control, unparasitized stem	A. thaliana (xrn4)				rep_2
SRR9216037	60_PARE_xrn4_CS_rep3.fastq.gz	lib60_PARE_xrn4_CS_rep3	tissue60_xrn4_CS_rep3	NanoPARE	(CS) control, unparasitized stem	A. thaliana (xrn4)				rep_3
SRR9216111	61_PARE_ccm_IN_rep1.fastq.gz	lib61_PARE_ccm_IN_rep1	tissue1_ccm_IN_rep1	NanoPARE	(IN) interface	A. thaliana (Col-0)	C. campestris	ccm	germinated seedling	rep_1
SRR9216113	62_PARE_ccm_IN_rep2.fastq.gz	lib62_PARE_ccm_IN_rep2	tissue3_ccm_IN_rep2	NanoPARE	(IN) interface	A. thaliana (Col-0)	C. campestris	ccm	germinated seedling	rep_2
SRR9216114	63_PARE_ccm_IN_rep3.fastq.gz	lib63_PARE_ccm_IN_rep3	tissue5_ccm_IN_rep3	NanoPARE	(IN) interface	A. thaliana (Col-0)	C. campestris	ccm	germinated seedling	rep_3
SRR9216116	64_PARE_cgr-dp_IN_rep1.fastq.gz	lib64_PARE_cgr-dp_IN_rep1	tissue7_cgr-dp_IN_rep1	NanoPARE	(IN) interface	A. thaliana (Col-0)	C. gronovii	cgr-dp	germinated seedling	rep_1
SRR9216105	65_PARE_cgr-dp_IN_rep2.fastq.gz	lib65_PARE_cgr-dp_IN_rep2	tissue9_cgr-dp_IN_rep2	NanoPARE	(IN) interface	A. thaliana (Col-0)	C. gronovii	cgr-dp	germinated seedling	rep_2
SRR9216107	66_PARE_cgr-dp_IN_rep3.fastq.gz	lib66_PARE_cgr-dp_IN_rep3	tissue11_cgr-dp_IN_rep3	NanoPARE	(IN) interface	A. thaliana (Col-0)	C. gronovii	cgr-dp	germinated seedling	rep_3
SRR9216108	67_PARE_cpe-2015_IN_rep1.fastq.gz	lib67_PARE_cpe-2015_IN_rep1	tissue25_cpe-2015_IN_rep1	NanoPARE	(IN) interface	A. thaliana (Col-0)	C. pentagona	cpe-2015	germinated seedling	rep_1
SRR9216110	68_PARE_cpe-2015_IN_rep2.fastq.gz	lib68_PARE_cpe-2015_IN_rep2	tissue27_cpe-2015_IN_rep2	NanoPARE	(IN) interface	A. thaliana (Col-0)	C. pentagona	cpe-2015	germinated seedling	rep_2
SRR9216117	69_PARE_cpe-2015_IN_rep3.fastq.gz	lib69_PARE_cpe-2015_IN_rep3	tissue29_cpe-2015_IN_rep3	NanoPARE	(IN) interface	A. thaliana (Col-0)	C. pentagona	cpe-2015	germinated seedling	rep_3
SRR9216118	70_PARE_cin_IN_rep1.fastq.gz	lib70_PARE_cin_IN_rep1	tissue37_cin_IN_rep1	NanoPARE	(IN) interface	A. thaliana (Col-0)	C. indecora	cin	~5 cm tendril tip from adult plant	rep_1
SRR9216100	71_PARE_cin_IN_rep2.fastq.gz	lib71_PARE_cin_IN_rep2	tissue39_cin_IN_rep2	NanoPARE	(IN) interface	A. thaliana (Col-0)	C. indecora	cin	~5 cm tendril tip from adult plant	rep_2
SRR9216099	72_PARE_cin_IN_rep3.fastq.gz	lib72_PARE_cin_IN_rep3	tissue41_cin_IN_rep3	NanoPARE	(IN) interface	A. thaliana (Col-0)	C. indecora	cin	~5 cm tendril tip from adult plant	rep_3
SRR9216097	73_PARE_ath_CS_rep1.fastq.gz	lib73_PARE_ath_CS_rep1	tissue43_ath_CS_rep1	NanoPARE	(CS) control, unparasitized stem	A. thaliana (Col-0)				rep_1
SRR9216096	74_PARE_ath_CS_rep2.fastq.gz	lib74_PARE_ath_CS_rep2	tissue44_ath_CS_rep2	NanoPARE	(CS) control, unparasitized stem	A. thaliana (Col-0)				rep_2
SRR9216104	75_PARE_ath_CS_rep3.fastq.gz	lib75_PARE_ath_CS_rep3	tissue45_ath_CS_rep3	NanoPARE	(CS) control, unparasitized stem	A. thaliana (Col-0)				rep_3
SRR9216103	76_mRNA_ccm_IN_rep1.fastq.gz	lib76_mRNA_ccm_IN_rep1	tissue1_ccm_IN_rep1	mRNA-seq	(IN) interface	A. thaliana (Col-0)	C. campestris	ccm	germinated seedling	rep_1
SRR9216115	77_mRNA_ccm_IN_rep2.fastq.gz	lib77_mRNA_ccm_IN_rep2	tissue3_ccm_IN_rep2	mRNA-seq	(IN) interface	A. thaliana (Col-0)	C. campestris	ccm	germinated seedling	rep_2
SRR9216102	78_mRNA_ccm_IN_rep3.fastq.gz	lib78_mRNA_ccm_IN_rep3	tissue5_ccm_IN_rep3	mRNA-seq	(IN) interface	A. thaliana (Col-0)	C. campestris	ccm	germinated seedling	rep_3
SRR9216094	79_mRNA_cgr-dp_IN_rep1.fastq.gz	lib79_mRNA_cgr-dp_IN_rep1	tissue7_cgr-dp_IN_rep1	mRNA-seq	(IN) interface	A. thaliana (Col-0)	C. gronovii	cgr-dp	germinated seedling	rep_1
SRR9216093	80_mRNA_cgr-dp_IN_rep2.fastq.gz	lib80_mRNA_cgr-dp_IN_rep2	tissue9_cgr-dp_IN_rep2	mRNA-seq	(IN) interface	A. thaliana (Col-0)	C. gronovii	cgr-dp	germinated seedling	rep_2
SRR9216071	81_mRNA_cgr-dp_IN_rep3.fastq.gz	lib81_mRNA_cgr-dp_IN_rep3	tissue11_cgr-dp_IN_rep3	mRNA-seq	(IN) interface	A. thaliana (Col-0)	C. gronovii	cgr-dp	germinated seedling	rep_3
SRR9216109	82_mRNA_cpe-2015_IN_rep1.fastq.gz	lib82_mRNA_cpe-2015_IN_rep1	tissue25_cpe-2015_IN_rep1	mRNA-seq	(IN) interface	A. thaliana (Col-0)	C. pentagona	cpe-2015	germinated seedling	rep_1
SRR9216069	83_mRNA_cpe-2015_IN_rep2.fastq.gz	lib83_mRNA_cpe-2015_IN_rep2	tissue27_cpe-2015_IN_rep2	mRNA-seq	(IN) interface	A. thaliana (Col-0)	C. pentagona	cpe-2015	germinated seedling	rep_2
SRR9216070	84_mRNA_cpe-2015_IN_rep3.fastq.gz	lib84_mRNA_cpe-2015_IN_rep3	tissue29_cpe-2015_IN_rep3	mRNA-seq	(IN) interface	A. thaliana (Col-0)	C. pentagona	cpe-2015	germinated seedling	rep_3
SRR9216106	85_mRNA_cin_IN_rep1.fastq.gz	lib85_mRNA_cin_IN_rep1	tissue37_cin_IN_rep1	mRNA-seq	(IN) interface	A. thaliana (Col-0)	C. indecora	cin	~5 cm tendril tip from adult plant	rep_1
SRR9216068	86_mRNA_cin_IN_rep2.fastq.gz	lib86_mRNA_cin_IN_rep2	tissue39_cin_IN_rep2	mRNA-seq	(IN) interface	A. thaliana (Col-0)	C. indecora	cin	~5 cm tendril tip from adult plant	rep_2
SRR9216066	87_mRNA_cin_IN_rep3.fastq.gz	lib87_mRNA_cin_IN_rep3	tissue41_cin_IN_rep3	mRNA-seq	(IN) interface	A. thaliana (Col-0)	C. indecora	cin	~5 cm tendril tip from adult plant	rep_3
SRR9216067	88_mRNA_ath_CS_rep1.fastq.gz	lib88_mRNA_ath_CS_rep1	tissue43_ath_CS_rep1	mRNA-seq	(CS) control, unparasitized stem	A. thaliana (Col-0)				rep_1
SRR9216072	89_mRNA_ath_CS_rep2.fastq.gz	lib89_mRNA_ath_CS_rep2	tissue44_ath_CS_rep2	mRNA-seq	(CS) control, unparasitized stem	A. thaliana (Col-0)				rep_2
SRR9216073	90_mRNA_ath_CS_rep3.fastq.gz	lib90_mRNA_ath_CS_rep3	tissue45_ath_CS_rep3	mRNA-seq	(CS) control, unparasitized stem	A. thaliana (Col-0)				rep_3
SRR6074030	from prior study (shahid et al. 2018)	from prior study (shahid et al. 2018)	cca-nbe PS 7	sRNA-seq	(PS) parasite stem	N. benthamiana	C. campestris	ccm	germinated seedling	rep_1
SRR6074031	from prior study (shahid et al. 2018)	from prior study (shahid et al. 2018)	cca-nbe PS 1	sRNA-seq	(PS) parasite stem	N. benthamiana	C. campestris	ccm	germinated seedling	rep_2
SRR6074040	from prior study (shahid et al. 2018)	from prior study (shahid et al. 2018)	cca-nbe I 5	sRNA-seq	(IN) interface	N. benthamiana	C. campestris	ccm	germinated seedling	rep_1
SRR6074041	from prior study (shahid et al. 2018)	from prior study (shahid et al. 2018)	cca-nbe I 3	sRNA-seq	(IN) interface	N. benthamiana	C. campestris	ccm	germinated seedling	rep_2
