# Supplementary material for: Compensatory sequence variation between trans-species small RNAs and their target sites
Source: eLife. 2019 Dec 17;8:e49750. doi: 10.7554/eLife.49750 (PMC6917502; doi:10.7554/eLife.49750)
Supplement: Supplementary file 3. — Format: xlsx [file elife-49750-supp3.xlsx]

## Sheet: F1 T1 04xout-methods_of_results
Supplementa file 3. Testing alternative p-value cutoffs for HI-sRNA detection
parasite	alpha	HI-sRNAs
ccm	0.1	363
ccm	0.05	322
ccm	0.01	247
cgr-dp	0.1	491
cgr-dp	0.05	455
cgr-dp	0.01	393
cgr-pm	0.1	713
cgr-pm	0.05	682
cgr-pm	0.01	605
cgr-mass	0.1	831
cgr-mass	0.05	800
cgr-mass	0.01	714
cpe-2015	0.1	351
cpe-2015	0.05	340
cpe-2015	0.01	314
cpe-2017	0.1	369
cpe-2017	0.05	350
cpe-2017	0.01	325
cin	0.1	424
cin	0.05	331
cin	0.01	209
