# Supplementary material for: Compensatory sequence variation between trans-species small RNAs and their target sites
Source: eLife. 2019 Dec 17;8:e49750. doi: 10.7554/eLife.49750 (PMC6917502; doi:10.7554/eLife.49750)
Supplement: Supplementary file 4. — Format: xlsx [file elife-49750-supp4.xlsx]

## Sheet: S1 - HI-sRNAs.txt
Supplemental file 4. Comprehensive list of HI-sRNAs discovered in this study.
						Abundance: by tissue/replicate							Abundance: by read length
HI-sRNA	sequence	predominant_length	superfamily	published_name	from_miRNA?	IN1	IN2	IN3	PS1	PS2	PS3	total_abundance	20	21	22	23	24
Cl_ccm_2	UGUACCAUGAUUUGUAGACGAG	22	SupFam_27	ccm-MIR12497a*	Y	42879	26904	52043	734	519	740	123819	4851	8257	101991	8645	75
Cl_ccm_3	UGGCAGAAGUAGGAAUCGCAGU	22	SupFam_6	N	Y	17646	11287	27374	116	138	60	56621	53	313	56030	202	23
Cl_ccm_4	AGUGUGCGAGUCAUGGAACAAC	22	SupFam_453	N	Y	16296	15776	33274	628	201	219	66394	2890	385	49847	13195	77
Cl_ccm_7	UUUGCAUAAAUUCGUAGACUAG	22	SupFam_1	ccm-MIR12463b	Y	12492	8242	13456	478	401	406	35475	761	3906	30677	129	2
Cl_ccm_10	CGGUUCCAUUCUCAUGACGGU	21	SupFam_61	N	Y	10997	10928	14578	27	88	26	36644	327	23662	12595	60	0
Cl_ccm_15	UGUCCCGGUGAACAGUUUUCUU	22	SupFam_62	ccm-MIR12479	Y	5672	4331	8865	112	186	180	19346	112	1456	17703	62	13
Cl_ccm_16	UGGAGCGGUGAAAUUGCGUAG	21	SupFam_454	N	N	9573	9340	10148	3921	654	600	34236	5803	18191	7267	2975	0
Cl_ccm_17	UGUAUCUCUGUUAUUAAAGCUU	22	SupFam_63	N	Y	4651	5319	9524	100	103	56	19753	131	532	17423	1588	79
Cl_ccm_19	UCCAUAUGUAUUGAGCUGUCUC	22	SupFam_116	ccm-MIR12494b	Y	4305	4394	8664	102	58	62	17585	216	1578	15637	48	106
Cl_ccm_20	CAGCUCGAAUCGUAGUAACCGA	22	SupFam_260	ccm-MIR12469b	Y	4761	2987	7815	110	158	185	16016	212	2917	12715	137	35
Cl_ccm_23	UAAGUCGUUCAUGUGCUUCGC	21	SupFam_39	N	Y	4590	3233	7186	36	60	51	15156	61	14812	276	7	0
Cl_ccm_27	AGGAAACAUAUUGUGGCUCGGC	22	SupFam_15	ccm-MIR12487	Y	3927	2281	5913	31	51	40	12243	31	288	11050	749	125
Cl_ccm_29	CAGCUUGAAAUGUAGUAUCCU	21	SupFam_52	ccm-MIR12469a	Y	4767	2726	6580	55	78	85	14291	1114	10721	2325	131	0
Cl_ccm_30	UGCGAUUCCUGCUUCAGCUAUG	22	SupFam_50	N	Y	2995	2190	3901	16	26	21	9149	17	48	9006	75	3
Cl_ccm_34	CGUUUGCAAAUCAUGGUACAGC	22	SupFam_117	ccm-MIR12497a	Y	3532	2175	3398	93	187	155	9540	25	375	9112	21	7
Cl_ccm_35	GCUCAGGGGCCGAGAUGCAUG	21	SupFam_261	ccm-MIR12496*	Y	2649	1949	3528	13	24	9	8172	52	7896	163	61	0
Cl_ccm_37	AGGAUGGAUGGACUUUGUGAG	21	SupFam_64	N	Y	2897	1634	2939	13	34	11	7528	60	7277	189	2	0
Cl_ccm_38	CGGUGGAGCGGUGAAAUUGCGUAG	24	SupFam_454	N	N	3786	2876	4193	1015	183	166	12219	0	0	1083	2355	8781
Cl_ccm_43	UGGGCAUGUGUUUCAGAUGAGA	22	SupFam_757	N	N	1983	1420	3525	2	4	0	6934	8	292	6614	20	0
Cl_ccm_46	CGUCAUUGGAAUGGGAUUGGAU	22	SupFam_262	ccm-MIR12492	Y	2065	2023	3568	22	32	38	7748	224	700	6458	353	13
Cl_ccm_60	CACGAAUAAAGAAAGGCGACUU	22	SupFam_16	N	Y	3259	2275	3745	78	173	193	9723	297	3838	5502	76	10
Cl_ccm_61	AAGUGGUGGAAAAGCUCGAGU	21	SupFam_263	N	Y	1589	1368	2698	75	86	84	5900	127	5710	61	2	0
Cl_ccm_62	GUGUAUCUCUGUUAUUAAAGC	21	SupFam_63	N	Y	1325	1733	2761	117	61	41	6038	178	5680	174	6	0
Cl_ccm_68	AUAUGGAAGAUUGACUAGGUCC	22	SupFam_118	ccm-MIR12483	N	2446	1985	3974	32	23	30	8490	16	776	6856	790	52
Cl_ccm_71	GUGAAACUUGGGGGUCUCGUG	21	SupFam_119	ccm-MIR12489*	Y	1520	979	2097	5	14	4	4619	50	4457	104	8	0
Cl_ccm_73	GAGCAAAUAUGUGAAGAAGAAU	22	SupFam_120	ccm-MIR12491*	Y	1052	1061	2253	7	7	21	4401	43	24	4246	19	69
Cl_ccm_82	GAGUGACGAGAAAGUGGCGUA	21	SupFam_12	ccm-MIR12466*	Y	1442	1393	2674	3	5	4	5521	526	3992	935	68	0
Cl_ccm_89	CGAGACCCCUGAGUUUCCUCU	21	SupFam_121	N	Y	1693	1205	1670	18	42	50	4678	53	3839	744	42	0
Cl_ccm_92	ACAGGAGAGAAUGAAAAUGGA	21	SupFam_197	ccm-MIR12471	Y	1047	1570	2260	9	10	10	4906	210	3170	70	1456	0
Cl_ccm_98	ACCAUGAUUUGUAGACGAGU	20	SupFam_27	N	Y	1135	872	1666	12	5	6	3696	3384	302	10	0	0
Cl_ccm_99	GUCGUCAUUCUUUAUUCGUGGU	22	SupFam_51	N	Y	1417	1001	2026	60	128	164	4796	50	1091	3633	21	1
Cl_ccm_104	CAUGUGCCCUGUUUCUCCACC	21	SupFam_2	ccm-MIR164	Y	1537	940	1984	111	72	99	4743	326	4386	29	2	0
Cl_ccm_117	UACUCAGGCGCGGCGUAGCCAUU	23	SupFam_190	N	Y	1103	982	2082	7	34	20	4228	0	18	1340	2693	177
Cl_ccm_120	UGGCAAAAGUACGAAUCGCAAU	22	SupFam_6	N	Y	732	634	1387	13	10	9	2785	37	25	2598	117	8
Cl_ccm_127	UGACUUGAGAAUACUUGGCCC	21	SupFam_264	N	N	1338	972	2172	26	45	45	4598	224	4077	216	81	0
Cl_ccm_141	UGAGGAAUUAUGGAAAGAAGGG	22	SupFam_265	N	Y	1108	856	1986	1	2	0	3953	98	1416	2390	48	1
Cl_ccm_154	GGCUACGUUGCACUGAGUAUA	21	SupFam_122	ccm-MIR12495*	Y	513	592	1270	7	2	1	2385	157	2016	17	195	0
Cl_ccm_165	AGUGGAUGGCAAGAAGUGAGC	21	SupFam_17	ccm-MIR12474a	Y	575	540	1216	1	0	1	2333	41	2268	22	2	0
Cl_ccm_166	UUAUCUUUGUAGUCUUGCCAAG	22	SupFam_266	ccm-MIR12493	Y	961	592	888	7	36	27	2511	154	408	1929	20	0
Cl_ccm_170	UCUUGGUGAUGUUUGGGACGAC	22	SupFam_21	ccm-MIR12465b	Y	1032	822	1473	12	21	19	3379	216	101	2980	79	3
Cl_ccm_173	UGAGACUGAAGAAGAUUGCCCCC	23	SupFam_267	N	Y	1209	787	2204	9	11	19	4239	0	9	953	2934	343
Cl_ccm_177	UGAAUGGAUGGAAAGAAGUGCG	22	SupFam_17	ccm-MIR12474b	Y	1332	976	1791	5	12	6	4122	71	1862	2131	50	8
Cl_ccm_181	UUACUGUGACUGUAGUUUUAGAU	23	SupFam_455	N	N	2280	2010	1739	371	132	127	6659	0	1450	1621	1930	1658
Cl_ccm_183	UGAAUUGUCCGUGAAGCUGAC	21	SupFam_65	N	Y	718	439	1010	4	16	19	2206	58	1948	197	3	0
Cl_ccm_187	CUGUGACUGUAGUUUUAGAU	20	SupFam_455	N	N	840	668	529	112	53	47	2249	1871	353	25	0	0
Cl_ccm_197	GACAACUCAAUACAUAUGGACA	22	SupFam_268	ccm-MIR12494b*	Y	487	502	1033	1	2	5	2030	3	324	1670	3	30
Cl_ccm_205	CGAACGAGUCGUAGUAUCCUA	21	SupFam_18	N	Y	683	408	936	8	13	13	2061	410	1583	30	38	0
Cl_ccm_207	GCGAUGCGAUCCCUAUGGACG	21	SupFam_13	N	Y	598	477	761	29	17	18	1900	37	1715	142	6	0
Cl_ccm_211	UGCGGUCACAUUUGCUACUAGA	22	SupFam_66	N	Y	419	431	737	0	2	4	1593	1	50	1528	9	5
Cl_ccm_231	CGAAUCAUCUCCUCCAUCGGG	21	SupFam_53	N	Y	341	482	701	5	7	4	1540	23	1502	15	0	0
Cl_ccm_234	UGAUGGAAUGAAGAUGCGGAGUA	23	SupFam_67	N	Y	1222	1218	2479	8	18	4	4949	0	52	2134	2715	48
Cl_ccm_237	CACGUGCCAUGUUUCUCCAUC	21	SupFam_2	N	Y	931	679	1156	32	25	22	2845	786	2054	5	0	0
Cl_ccm_246	UUACCUUUUAAUUUGAACCUU	21	SupFam_191	N	N	699	520	854	4	15	13	2105	98	1567	431	9	0
Cl_ccm_253	UUUGGAAGUUCAGGUGUUGGUA	22	SupFam_11	ccm-MIR12486*	Y	604	380	636	3	3	2	1628	9	286	1314	14	5
Cl_ccm_254	UGAACGGGGAAGAAGAUAGAUG	22	SupFam_269	N	Y	411	440	584	2	6	5	1448	13	37	1384	13	1
Cl_ccm_259	CCUGUACGGAGGGGGGACAAC	21	SupFam_40	ccm-MIR12480*	Y	405	331	745	1	0	0	1482	30	1424	26	2	0
Cl_ccm_278	CACAAAGUCUAUCCAUCCUUU	21	SupFam_270	N	Y	451	328	551	3	15	8	1356	41	1310	5	0	0
Cl_ccm_279	CAGCUUCACGGAUAAUUCACC	21	SupFam_271	N	Y	457	391	826	2	0	2	1678	106	1549	23	0	0
Cl_ccm_315	GAUGUUGAGAUUGAAGUGGUG	21	SupFam_19	ccm-MIR12464	Y	519	374	738	11	9	12	1663	34	1605	20	4	0
Cl_ccm_316	UCUGUCCUCUUCGCCGUUCAUC	22	SupFam_272	N	Y	317	307	514	4	10	9	1161	1	3	1144	9	4
Cl_ccm_328	UUGCUAGAAUAUGAAGAGGUU	21	SupFam_273	ccm-MIR12475	Y	389	230	618	1	6	1	1245	11	1170	59	5	0
Cl_ccm_335	AGAAGUGGAAAUCCUUGAGU	20	SupFam_274	N	Y	581	530	996	3	1	2	2113	1191	906	16	0	0
Cl_ccm_340	UAGAGCGGAAAGGAUCGUCCAC	22	SupFam_275	ccm-MIR12488	Y	373	347	583	9	8	4	1324	80	36	1126	80	2
Cl_ccm_367	AGCUGUGGGAGACGUGGCGGA	21	SupFam_758	N	N	563	281	819	59	19	51	1792	39	1390	348	15	0
Cl_ccm_391	AGCUGCCCCAAGAAUUUCAUA	21	SupFam_123	N	Y	277	261	508	2	2	0	1050	57	973	9	11	0
Cl_ccm_411	UGAAAUUCUUGGUGGCAGUCUU	22	SupFam_26	N	Y	329	240	424	0	13	11	1017	4	10	979	20	4
Cl_ccm_438	UGUACCAUGACUUGCACACUAA	22	SupFam_27	N	Y	593	379	774	9	12	12	1779	214	541	976	41	7
Cl_ccm_439	UGACUGAGAAGUUGAGUGCUA	21	SupFam_24	ccm-MIR12473	Y	339	306	581	3	19	11	1259	203	900	140	16	0
Cl_ccm_449	AGCGCUGUGGCAGCUAUCUUCU	22	SupFam_276	N	Y	329	281	428	1	13	6	1058	1	48	1005	4	0
Cl_ccm_468	UUGGCAAGUAAUUUUGAGGAU	21	SupFam_759	ccm-MIR12472	Y	284	262	527	4	14	7	1098	13	1067	16	2	0
Cl_ccm_497	GCUCAGCAGGAGGUAGGGUCC	21	SupFam_68	N	N	642	857	888	143	108	66	2704	578	1296	96	734	0
Cl_ccm_498	UCAGUUUCUCCCUCUUUGACCCUC	24	SupFam_277	N	Y	208	249	466	0	0	2	925	0	0	4	51	870
Cl_ccm_500	UCUGUGCGGAGGAGAGGACGGC	22	SupFam_278	N	Y	324	330	487	1	2	0	1144	2	217	891	33	1
Cl_ccm_501	UCAGCAGGAGGUAGGGUCCAG	21	SupFam_68	N	N	1055	1293	1054	204	169	75	3850	599	1324	1520	407	0
Cl_ccm_513	GAGAGGUGGUUGGCGAUUCCCC	22	SupFam_54	ccm-MIR12476b	Y	523	501	777	11	29	16	1857	39	638	984	194	2
Cl_ccm_529	CUUCCGAUGUGGGAUGCACUCUC	23	SupFam_760	N	N	1103	1392	1846	530	52	108	5031	0	105	342	3817	767
Cl_ccm_535	UGUCCUCUCCUCCGUAUAGGUA	22	SupFam_5	ccm-MIR12480	Y	307	213	342	1	9	5	877	26	98	744	4	5
Cl_ccm_572	CCCGCACCUGAACUUCCAAAGA	22	SupFam_192	ccm-MIR12486	Y	244	204	298	0	1	0	747	7	61	673	4	2
Cl_ccm_614	UGUACCAUGAUUUGCAUACCAA	22	SupFam_27	ccm-MIR12497b	Y	220	182	432	1	3	5	843	69	92	659	22	1
Cl_ccm_615	GUAAAGGACAAUACAAGUGCU	21	SupFam_279	ccm-MIR12470	Y	270	178	341	1	5	6	801	20	777	3	1	0
Cl_ccm_653	GCUCAGCAGGAGGUAGGGUCCAGC	24	SupFam_68	N	N	230	331	352	46	47	31	1037	0	0	0	110	927
Cl_ccm_662	UGAAGGCAGCCAGAUGAGCAU	21	SupFam_280	N	Y	208	175	344	0	6	7	740	14	714	12	0	0
Cl_ccm_670	UCACGUAAAGCUUUCCAUCCAU	22	SupFam_281	N	Y	278	182	394	1	5	4	864	31	76	654	98	5
Cl_ccm_678	UGCAUCUCCGCCUCCUGAGCAC	22	SupFam_282	ccm-MIR12496	Y	233	202	327	1	4	1	768	69	38	643	12	6
Cl_ccm_726	CGAAGCUGUGGGAUGUAAAA	20	SupFam_193	N	N	372	570	544	101	15	18	1620	535	437	648	0	0
Cl_ccm_731	GUUAAGAGUGUCGUUUGUGGAU	22	SupFam_283	N	Y	174	139	335	0	0	0	648	16	20	586	7	19
Cl_ccm_757	AGGUGUACGGACAGAACGAAGAGA	24	SupFam_456	N	N	219	99	255	18	1	5	597	0	0	6	50	541
Cl_ccm_768	GGGCAUGGGGGAAAAACUGAAA	22	SupFam_284	N	Y	138	164	281	2	0	1	586	14	64	502	6	0
Cl_ccm_776	CGAUGGAGGAGAUGAUACGCC	21	SupFam_7	N	Y	234	192	256	5	14	10	711	3	707	0	1	0
Cl_ccm_787	CCGGCUGUACCUAUCUCUAGGUAC	24	SupFam_761	N	N	181	271	305	67	5	7	836	0	0	1	14	821
Cl_ccm_818	UAUUCUGGUGCAGCGUAACCCUG	23	SupFam_124	N	N	212	150	232	4	3	11	612	0	8	12	517	75
Cl_ccm_819	GAGAUUGCUGAAAAAGAAGAA	21	SupFam_125	ccm-MIR12468	Y	107	157	324	1	3	6	598	72	494	31	1	0
Cl_ccm_840	UAUGUAGCAAUUUUGAAGAAU	21	SupFam_285	N	Y	273	227	444	2	2	8	956	7	540	403	6	0
Cl_ccm_843	AAGAAUAUUUCUGGACGGAGG	21	SupFam_286	N	N	200	127	202	17	4	7	557	5	529	16	7	0
Cl_ccm_851	CCCUCGCGGAUGGAGCUGAAGCC	23	SupFam_762	N	N	195	55	781	68	19	6	1124	0	43	279	778	24
Cl_ccm_871	UCUGCAUGUAUUCAUAAACAA	21	SupFam_1	ccm-MIR12463a*	Y	256	174	257	0	4	7	698	117	486	69	26	0
Cl_ccm_934	UCGAGCUUUUCCACUACUUCU	21	SupFam_194	N	Y	189	119	239	12	5	16	580	13	566	1	0	0
Cl_ccm_935	CUACUUCAAUCUCAACAUCUU	21	SupFam_287	ccm-MIR12464*	Y	178	138	229	14	19	27	605	12	501	91	1	0
Cl_ccm_959	CACUUGUAUUGUCUUUUGCUU	21	SupFam_288	ccm-MIR12470*	Y	133	139	213	0	15	7	507	11	483	13	0	0
Cl_ccm_979	AAGCUGUGGGAUGUAAAAAG	20	SupFam_193	N	N	213	210	214	62	13	9	721	435	271	15	0	0
Cl_ccm_991	UCAUUUGAAACACAGGCCCAAG	22	SupFam_763	N	N	197	81	216	9	2	4	509	61	10	436	2	0
Cl_ccm_999	GCGACGUAGACUCCAAUCACUUGG	24	SupFam_764	N	N	115	135	169	42	4	2	467	0	0	10	21	436
Cl_ccm_1015	UGGAAAUCAAUUAUGUGGAUU	21	SupFam_289	N	Y	150	124	226	7	5	6	518	9	453	56	0	0
Cl_ccm_1028	CGUCCGGACAUCAGCAAAUU	20	SupFam_126	N	N	187	149	277	0	0	0	613	542	34	37	0	0
Cl_ccm_1047	UGGAUAAUCCCUUUCCCACCUA	22	SupFam_178	N	Y	166	139	302	1	2	2	612	7	176	415	14	0
Cl_ccm_1127	UUCAUGAGUGGAAGAAAUUAUG	22	SupFam_290	N	N	141	104	181	0	6	4	436	6	15	410	5	0
Cl_ccm_1134	CAUUUUCAUUCUCUCCUAUGAUU	23	SupFam_765	N	Y	111	161	203	1	5	5	486	0	55	11	420	0
Cl_ccm_1213	UGCUCGAGCUGAUGAGGAAGACGU	24	SupFam_291	N	N	214	194	311	12	0	4	735	0	0	14	34	687
Cl_ccm_1231	CUACAGUCUGCGGACCACUACUGU	24	SupFam_766	N	N	188	136	188	56	12	28	608	0	0	2	6	600
Cl_ccm_1276	UGCUGUCAUAUUUGCUACUGGG	22	SupFam_66	N	Y	109	117	191	1	0	0	418	17	13	379	9	0
Cl_ccm_1325	UGUGGUGAAGCCGAUGAUGAGA	22	SupFam_292	N	Y	140	151	207	1	0	0	499	17	133	344	1	4
Cl_ccm_1329	UCUCUGUGUACUGUAUUUCUU	21	SupFam_127	N	Y	159	124	234	3	4	2	526	103	381	39	3	0
Cl_ccm_1386	GCUCGUCUGGCUGCUUUCACA	21	SupFam_293	N	Y	102	148	229	1	0	1	481	21	455	4	1	0
Cl_ccm_1409	CGUGUGGCUCAGAUUGCAUCCUGC	24	SupFam_457	N	N	185	281	315	75	10	12	878	0	0	14	107	757
Cl_ccm_1471	CCGGCUGUACGGUUCUUCUCGUAC	24	SupFam_767	N	N	114	200	241	20	3	1	579	0	0	0	6	573
Cl_ccm_1478	CCGGCUGUACGGAAAGAACCGUAC	24	SupFam_458	N	N	284	483	534	68	6	7	1382	0	0	2	24	1356
Cl_ccm_1510	AAGGUCAGAUAGAAGAAAUGGA	22	SupFam_294	N	Y	94	114	259	0	0	0	467	9	130	324	0	4
Cl_ccm_1541	CACUCCGGAUCAAGAUACCCUA	22	SupFam_295	N	Y	137	119	284	2	7	8	557	30	202	312	7	6
Cl_ccm_1559	CGAGUGACAAUAUGUUUUCCGU	22	SupFam_9	ccm-MIR12487*	Y	154	99	143	1	12	15	424	4	7	350	62	1
Cl_ccm_1577	CGUCUCUUUUACAAUGCAACAG	22	SupFam_8	N	Y	115	111	125	0	3	0	354	6	4	312	32	0
Cl_ccm_1579	AAUGAAAGAACACCACAACGUU	22	SupFam_69	N	Y	169	97	174	3	6	8	457	7	101	346	2	1
Cl_ccm_1616	AAAAUACAGUACAUAGAGAGC	21	SupFam_296	ccm-MIR12478	Y	91	108	167	1	1	2	370	13	347	10	0	0
Cl_ccm_1623	UUAGGACAAACAUUUGAGAGAC	22	SupFam_35	ccm-MIR12482	Y	112	96	201	0	4	1	414	9	58	322	20	5
Cl_ccm_1625	UCUUCGUUCUGUCCGUACACCUGG	24	SupFam_768	N	N	151	67	128	15	2	3	366	0	0	20	30	316
Cl_ccm_1655	UCAUCAUCGGCUUCACCACAGA	22	SupFam_297	N	Y	86	74	178	0	1	2	341	3	49	287	2	0
Cl_ccm_1657	UAUGAAGGUCUGUUUCCCCAU	21	SupFam_128	N	Y	145	130	278	2	12	6	573	3	398	169	3	0
Cl_ccm_1845	CCCGGACACUUUGCAAGGAAA	21	SupFam_70	ccm-MIR12477	Y	53	106	152	0	1	0	312	41	264	6	1	0
Cl_ccm_1892	CUGUGUAGGUAAUUUAACCCUC	22	SupFam_49	ccm-MIR12485	Y	69	94	144	4	2	4	317	1	24	291	1	0
Cl_ccm_1893	CCGGUUCCAUUCUCAUGACG	20	SupFam_61	N	Y	106	102	87	1	0	0	296	280	14	2	0	0
Cl_ccm_1917	UGCCGAAGCUGUGGGAUGUAAAA	23	SupFam_193	N	N	75	104	108	31	5	4	327	0	3	33	253	38
Cl_ccm_1970	GGGCAAUCUUAGCAGUCUUGAC	22	SupFam_298	N	Y	94	82	189	0	0	0	365	8	44	294	18	1
Cl_ccm_1979	UCAAGGAUUUCCACUUCUCG	20	SupFam_20	N	Y	183	102	173	0	1	4	463	301	57	105	0	0
Cl_ccm_2127	GGAUGAUCCUUUCUGCUCUCAUU	23	SupFam_195	N	Y	189	172	357	1	1	1	721	0	238	215	266	2
Cl_ccm_2177	CUCUGCAUCUUCAUUCCAUCUU	22	SupFam_25	N	Y	219	238	410	8	6	5	886	42	52	399	381	12
Cl_ccm_2205	GUUGCUACAUUUCAAGCUGGC	21	SupFam_299	ccm-MIR12469a*	Y	100	67	120	2	5	4	298	3	289	4	2	0
Cl_ccm_2243	GGAGAUUGUACAAAGAGAUACU	22	SupFam_71	N	Y	199	136	285	2	0	0	622	21	47	382	154	18
Cl_ccm_2258	UGAACAUGUCAUAGUAUCCCA	21	SupFam_18	N	Y	64	57	150	1	0	0	272	27	240	3	2	0
Cl_ccm_2301	AGCCUUUAGACUCUCAUUGGU	21	SupFam_769	N	Y	127	105	208	0	1	0	441	1	258	182	0	0
Cl_ccm_2309	AAGAUGGUUGCCACAGCACUCC	22	SupFam_300	N	Y	101	69	127	1	2	0	300	2	18	276	3	1
Cl_ccm_2410	UGGACUGUCCGAUCGCAAUGGUGC	24	SupFam_770	N	N	63	114	107	16	2	1	303	0	0	1	14	288
Cl_ccm_2508	GAGAGAUGGUGGAUGAAUCUAC	22	SupFam_54	N	Y	90	64	88	0	0	0	242	3	5	229	5	0
Cl_ccm_2523	CAGGAGCUAUGUAUGCAGGGA	21	SupFam_301	ccm-MIR12467	Y	68	66	118	2	5	1	260	19	211	28	2	0
Cl_ccm_2562	UGUAAAAGCAUUCUGGAUCUA	21	SupFam_196	N	Y	147	102	179	4	1	0	433	76	240	114	3	0
Cl_ccm_2571	CUCGAGCUGAUGAGGAAGACGUG	23	SupFam_291	N	N	79	97	118	26	2	7	329	0	13	11	243	62
Cl_ccm_2593	UCUUACUAAUAUUAGGGACUC	21	SupFam_129	N	Y	76	87	119	0	5	5	292	7	268	16	1	0
Cl_ccm_2638	GGGUAUUCUUGAUCUUGAGUGGU	23	SupFam_771	N	Y	78	90	211	1	4	3	387	0	12	137	227	11
Cl_ccm_2666	UUCUUCUGAAACACAGAUCCAU	22	SupFam_302	N	N	88	63	98	1	2	1	253	5	4	238	6	0
Cl_ccm_2700	CCGAAGCUGUGGGAUGUAAAAAG	23	SupFam_193	N	N	102	103	148	28	2	5	388	0	0	11	201	176
Cl_ccm_2720	UAGCCAAGGAUGAUUUGCCGUU	22	SupFam_72	N	Y	141	78	171	2	3	3	398	18	125	248	6	1
Cl_ccm_2845	AUCCGGAUGUACGGGAAGAACCGU	24	SupFam_459	N	N	90	88	167	30	12	6	393	0	0	0	5	388
Cl_ccm_2860	GGAUAUGUGUUUCAGAAGAAUA	22	SupFam_303	N	N	56	67	104	0	0	0	227	0	38	189	0	0
Cl_ccm_2887	AAGCCAAGGAUGAAUUGCCGU	21	SupFam_72	N	Y	68	52	94	0	1	2	217	8	204	4	1	0
Cl_ccm_2921	GUGCCGAAUCUUCUGUAGACGA	22	SupFam_460	N	N	89	469	120	19	5	2	704	90	176	246	109	83
Cl_ccm_2986	UUGAUCGGUUUAGAAAUAGAC	21	SupFam_772	N	N	70	166	59	8	0	0	303	20	192	91	0	0
Cl_ccm_3025	CAACAGGACGUGAAACCACU	20	SupFam_461	N	N	61	327	148	5	3	1	545	249	181	115	0	0
Cl_ccm_3148	GGAUACUAUGACUUGUUCAU	20	SupFam_60	N	Y	98	108	164	1	1	0	372	196	152	24	0	0
Cl_ccm_3216	CCAAGGUCAUCCAAGUUUGUU	21	SupFam_304	N	Y	67	46	71	0	0	0	184	2	178	4	0	0
Cl_ccm_3274	AUGUUCCGUGAAGGUUUUUUUGGC	24	SupFam_773	N	N	61	67	90	6	0	9	233	0	0	2	5	226
Cl_ccm_3302	UCAUCUCUGAAACACAAAUAU	21	SupFam_774	N	N	130	187	139	50	11	10	527	117	179	87	144	0
Cl_ccm_3353	GGGUUAAAUUGUCUACGCAGUG	22	SupFam_130	ccm-MIR12485*	Y	42	60	95	1	0	1	199	1	18	176	4	0
Cl_ccm_3358	CGCCACUUCUUCGUCACUCUC	21	SupFam_73	ccm-MIR12466	Y	131	98	204	4	1	2	440	21	245	168	6	0
Cl_ccm_3480	AGUGUGCGAGUCAUGGAACG	20	SupFam_453	N	Y	171	84	165	13	7	3	443	388	55	0	0	0
Cl_ccm_3680	AAACGGCAAAAGCAGUGGUUCUCC	24	SupFam_775	N	N	66	50	127	24	3	10	280	0	0	3	19	258
Cl_ccm_3708	UCACGAAUAAAGAAAGGCGAC	21	SupFam_16	N	Y	71	44	66	5	7	6	199	17	170	10	2	0
Cl_ccm_3720	UACAUCUUUUUCCUACGAGCUU	22	SupFam_305	N	Y	67	54	72	0	0	1	194	2	8	175	9	0
Cl_ccm_3766	CUUUUUGCCGUAUUUUCUCCG	21	SupFam_3	N	Y	43	47	87	2	2	5	186	4	176	6	0	0
Cl_ccm_3781	CUUCUUUCCGUACUUCCUCCGU	22	SupFam_3	N	Y	111	72	175	0	2	0	360	12	149	174	23	2
Cl_ccm_3806	GGAAUCACCAACCAUCUCUCUU	22	SupFam_306	ccm-MIR12476b*	Y	64	101	147	2	2	7	323	13	127	182	1	0
Cl_ccm_3809	UGAUGGAAUGAAGAUGCCGAGC	22	SupFam_67	N	Y	93	58	140	0	1	0	292	3	28	259	2	0
Cl_ccm_3824	CAAUGAGGAUUUGAAGGUUCC	21	SupFam_131	N	Y	52	83	145	2	3	2	287	19	226	42	0	0
Cl_ccm_3856	GCGACUGUAGGUGGAAACACCUGU	24	SupFam_776	N	N	34	65	52	7	0	2	160	0	0	0	3	157
Cl_ccm_3878	AUGUGCCAUGGUUCUCCAUC	20	SupFam_2	N	Y	84	49	82	5	3	1	224	158	66	0	0	0
Cl_ccm_3966	GGGAAACUUGGAGGAUUCAAG	21	SupFam_307	N	Y	55	29	73	0	0	0	157	4	151	2	0	0
Cl_ccm_4045	CCGGCUGUAUGGGAAGAAUCGUAC	24	SupFam_458	N	N	62	111	145	32	2	7	359	0	0	0	1	358
Cl_ccm_4160	GUGGGAACGCCGAUCAUUCUGUU	23	SupFam_777	N	N	45	63	69	13	3	5	198	0	11	4	174	9
Cl_ccm_4391	AAAUUACUGUGACUGUAGUUUU	22	SupFam_778	N	N	177	161	160	28	17	12	555	88	108	138	130	91
Cl_ccm_4398	GUGCGUGUGUCUGGGAUUGACUCC	24	SupFam_779	N	N	42	63	93	24	2	1	225	0	0	13	11	201
Cl_ccm_4448	UGCUUAUGUUGUUAAACUUGGA	22	SupFam_308	N	N	46	42	63	0	1	1	153	2	6	134	8	3
Cl_ccm_4486	UAAAAAGAUAUUAGCUCUUCUU	22	SupFam_309	N	N	59	34	54	0	1	1	149	0	7	140	2	0
Cl_ccm_4535	GUGGAGCGGUGAAAUGCGUAA	21	SupFam_225	N	N	123	55	195	5	0	0	378	12	247	116	3	0
Cl_ccm_4542	UGAUAUCCGGUCUGGAUCCCGUAC	24	SupFam_780	N	N	80	72	75	16	9	7	259	0	0	32	32	195
Cl_ccm_4548	AUAAAGGGAAUAGAGAUCAUACUG	24	SupFam_781	N	N	80	100	68	21	6	1	276	0	0	58	81	137
Cl_ccm_4557	ACGGCUCAGCAGGAGGUAGGGUCC	24	SupFam_68	N	N	140	143	269	32	28	15	627	0	0	66	190	371
Cl_ccm_4559	UCUGCAUGUAUUCGUACACCA	21	SupFam_1	N	Y	78	31	80	1	0	0	190	57	133	0	0	0
Cl_ccm_4717	CUUCUUUUUCAGCAGUCUCUC	21	SupFam_310	ccm-MIR12468*	Y	43	33	68	1	1	1	147	6	141	0	0	0
Cl_ccm_4831	GUCCGAUCGGAUCUGAGAAGGUUC	24	SupFam_782	N	N	32	47	83	14	1	1	178	0	0	1	29	148
Cl_ccm_4907	AGUUUAUGAAUUUAUGCAAAUA	22	SupFam_28	ccm-MIR12463b*	Y	46	48	72	0	1	1	168	9	29	126	3	1
Cl_ccm_4969	GGAUGGAAAGCUUUACGUGAUU	22	SupFam_311	N	Y	138	95	192	0	1	0	426	3	99	164	50	110
Cl_ccm_4973	UCAAGGAUUUCCACUUCUCGAUU	23	SupFam_20	N	Y	45	63	105	1	2	1	217	0	18	50	149	0
Cl_ccm_5104	CUUUGUCGCUAAGAUUCGAAA	21	SupFam_55	N	N	130	101	100	0	0	0	331	114	138	72	7	0
Cl_ccm_5138	GCUGACGUGUUCCCGAAUCUGUGA	24	SupFam_783	N	N	24	54	73	11	1	1	164	0	0	13	28	123
Cl_ccm_5310	CGUCCCUACGUCACCAAGUG	20	SupFam_74	N	Y	75	55	99	0	0	0	229	124	65	40	0	0
Cl_ccm_5331	GGAUGAUCCUUUCUGCUCUC	20	SupFam_195	N	Y	49	41	76	0	0	0	166	125	38	3	0	0
Cl_ccm_5621	GCACUCAAUUUCUCAGUCAUC	21	SupFam_48	ccm-MIR12473*	Y	32	47	44	0	1	0	124	1	123	0	0	0
Cl_ccm_5718	UGAACCUUCACUUUCUCAUCUC	22	SupFam_312	N	Y	32	31	63	2	0	0	128	0	3	122	0	3
Cl_ccm_5746	CCGGUGGAGCGGUGAAAUGCGUAA	24	SupFam_225	N	N	73	35	96	2	0	0	206	0	0	2	7	197
Cl_ccm_5796	GAGAAAGUAUGGCAAAAAGUU	21	SupFam_22	N	Y	30	38	58	0	0	0	126	4	114	7	1	0
Cl_ccm_6125	CUAGCGUGACUGGCAAGUGUGUC	23	SupFam_784	N	N	33	31	61	2	0	0	127	0	1	1	120	5
Cl_ccm_6154	UAAGUCACCUGCAACGUUUCC	21	SupFam_313	N	Y	37	38	42	0	0	0	117	4	113	0	0	0
Cl_ccm_6244	GCGGAUAUAGUCGAAUGGCU	20	SupFam_132	N	N	121	22	95	1	1	0	240	240	0	0	0	0
Cl_ccm_6260	AUGGAAACCAUCGUGCUGUAGACU	24	SupFam_785	N	N	13	49	123	3	0	5	193	0	0	33	33	127
Cl_ccm_6307	GUGAACAUCAUCCACUACACG	21	SupFam_114	N	Y	36	34	41	0	0	1	112	0	110	2	0	0
Cl_ccm_6321	AGUCCUCUCCUCCGUAUAGACA	22	SupFam_5	N	Y	41	28	56	0	2	1	128	0	17	105	4	2
Cl_ccm_6389	UAAAGGAUGGAUGGACUUUGUG	22	SupFam_64	N	Y	98	41	67	1	0	1	208	2	70	116	16	4
Cl_ccm_6422	GGUGAGAAAGAGAUUAUCCAAG	22	SupFam_786	N	Y	27	29	45	0	0	0	101	1	2	98	0	0
Cl_ccm_6605	UAGCAUCUGAGCCUUCCAAAG	21	SupFam_314	N	Y	57	46	65	11	5	8	192	2	103	73	14	0
Cl_ccm_6660	UAGCAGCAAAUGUGACAGCAUG	22	SupFam_133	N	Y	58	28	38	1	1	5	131	1	4	126	0	0
Cl_ccm_6668	UUGCUGUGGAUGACUGUGCAUC	22	SupFam_787	N	N	131	75	137	1	0	0	344	30	54	105	90	65
Cl_ccm_6791	UAUCUCUGUGUACAAUCUUCCU	22	SupFam_134	N	Y	70	49	62	1	2	3	187	1	12	122	12	40
Cl_ccm_6792	CACUUCUUUCCAUCCAUUCAC	21	SupFam_75	N	Y	66	54	91	1	3	3	218	2	182	33	1	0
Cl_ccm_6822	UAGUUUCACCCACCGUCUCUC	21	SupFam_135	ccm-MIR12476a	Y	32	35	40	0	1	0	108	0	102	6	0	0
Cl_ccm_7044	AGGUCUUGAGGUGCUGAACCACA	23	SupFam_788	N	N	26	49	47	4	0	1	127	0	2	2	118	5
Cl_ccm_7056	CGUUCUGUCCGUACACCUGGAUUC	24	SupFam_789	N	N	143	52	162	6	3	0	366	0	0	19	128	219
Cl_ccm_7074	CUUUGACAGGGACUCCCAGAGUG	23	SupFam_790	N	N	27	69	99	15	6	4	220	0	18	59	106	37
Cl_ccm_7090	AAGCGUUGUUGGUGACUCAUG	21	SupFam_315	N	Y	61	26	70	0	0	0	157	19	138	0	0	0
Cl_ccm_7146	UUUGCAUAAAUUCGUAGACC	20	SupFam_1	N	Y	41	27	60	0	2	0	130	130	0	0	0	0
Cl_ccm_7204	GGAACACUCGGUGCCGUAAGCUUU	24	SupFam_791	N	N	55	49	60	2	6	2	174	0	0	33	38	103
Cl_ccm_7306	UGCCUGGCGGCUGUAGCGCG	20	SupFam_792	N	N	31	12	184	3	2	0	232	179	49	4	0	0
Cl_ccm_7406	UCACAUCGUAGGUUGUCUUCUC	22	SupFam_136	N	N	28	23	45	0	0	0	96	4	4	86	2	0
Cl_ccm_7415	UGGCCGACUGAGUCACCAUGAUU	23	SupFam_793	N	N	88	117	139	32	1	7	384	0	7	4	197	176
Cl_ccm_7496	UCACAGGAGAGAAUGAAAAUGG	22	SupFam_197	N	Y	100	95	118	0	0	0	313	41	29	102	136	5
Cl_ccm_7773	GGCAAUUCUUCCCUUGGUUUCU	22	SupFam_316	N	N	24	35	58	0	0	0	117	0	16	101	0	0
Cl_ccm_7775	CGUCACCAGGGUGAACAGGUCC	22	SupFam_317	N	Y	27	38	53	0	3	2	123	3	1	114	5	0
Cl_ccm_7873	AUCCAGGUGUACGGACAGAACGAA	24	SupFam_462	N	N	56	38	68	4	5	3	174	0	0	10	16	148
Cl_ccm_7898	GGCAAUCACUCCUUGGCUAUC	21	SupFam_794	N	N	19	20	65	0	0	0	104	0	99	5	0	0
Cl_ccm_7908	CCAUACACGCCACUUUUAACAU	22	SupFam_318	N	Y	32	21	49	3	0	0	105	4	6	90	5	0
Cl_ccm_8027	GCAGAAUGUAAUGCUUUAGAU	21	SupFam_76	N	Y	24	24	45	0	0	2	95	4	88	3	0	0
Cl_ccm_8123	AUUUCUUGUUCAUCAUAUUCC	21	SupFam_137	N	Y	23	24	79	0	0	1	127	1	121	5	0	0
Cl_ccm_8151	AAUGAUCCGUGAGGCUUAACCU	22	SupFam_795	N	N	46	20	303	14	8	6	397	34	43	118	119	83
Cl_ccm_8323	AACGUGUUACCGGUCUGGUUGAGC	24	SupFam_796	N	N	16	50	44	10	0	2	122	0	0	0	3	119
Cl_ccm_8416	UCGCAUGACGAAGAAAAGCUCU	22	SupFam_797	N	N	28	13	73	3	0	1	118	1	0	96	21	0
Cl_ccm_8494	UCUUGCUGAUGUUUGGGACG	20	SupFam_21	N	Y	46	18	38	0	0	1	103	100	2	1	0	0
Cl_ccm_8745	UGGAUCUGAUGCAUCGUGCGGCUC	24	SupFam_463	N	N	182	211	318	48	3	6	768	0	0	6	207	555
Cl_ccm_9225	ACGUGAGUCCGCCUGGAGCUGCC	23	SupFam_798	N	N	43	66	165	17	6	0	297	0	8	61	123	105
Cl_ccm_9227	AGGCGUGGCUGAGGAUAUUUCUC	23	SupFam_799	N	N	16	40	41	6	0	1	104	0	1	0	90	13
Cl_ccm_9276	UUAUUUAGGACAAACAUUUGAG	22	SupFam_319	N	Y	36	24	31	0	0	0	91	6	4	78	0	3
Cl_ccm_9385	UUCAGUUUCUUAACAGCAAUU	21	SupFam_320	N	Y	43	27	37	0	2	3	112	24	84	4	0	0
Cl_ccm_9534	ACUUAGUCAAUCUUCCAUAACU	22	SupFam_321	ccm-MIR12483*	N	53	41	95	0	3	0	192	0	37	85	54	16
Cl_ccm_9724	GGUUGAUCUGCCGGUAGACGUUGC	24	SupFam_800	N	N	13	32	54	5	0	3	107	0	0	5	11	91
Cl_ccm_9822	UCCGAUGUGGGAACUCCAACACUC	24	SupFam_801	N	N	55	100	85	21	9	6	276	0	0	7	25	244
Cl_ccm_9888	GAUCUGCGACGGCACUCUAGUGGC	24	SupFam_802	N	N	22	39	59	9	0	0	129	0	0	1	3	125
Cl_ccm_10260	AGCUGACAGAGAAGAGCGACGUGU	24	SupFam_803	N	N	15	45	25	1	0	0	86	0	0	0	4	82
Cl_ccm_10427	AGUAGAAUGGAAUGCUUCAAA	21	SupFam_322	N	Y	23	23	29	3	0	0	78	10	66	2	0	0
Cl_ccm_10475	GGGACGACGAUUUGUGACACU	21	SupFam_804	N	N	49	32	87	1	0	0	169	64	102	3	0	0
Cl_ccm_10832	CGAGAGAGAAGGGGUAUCCGA	21	SupFam_323	N	N	14	17	46	0	1	1	79	9	68	0	2	0
Cl_ccm_11016	AGCGGUGCACUGCGUUUUUGGAGC	24	SupFam_805	N	N	15	34	45	6	1	1	102	0	0	9	2	91
Cl_ccm_11116	GGAUGUUGGCUGUUAGCUGGUGGC	24	SupFam_806	N	N	36	41	70	11	0	0	158	0	0	2	45	111
Cl_ccm_11312	UUCACAUAAUUGAUUUCCAGC	21	SupFam_324	N	Y	29	23	37	0	0	0	89	2	73	14	0	0
Cl_ccm_11556	AGAGUAGGACACUGCCAGGCAU	22	SupFam_807	N	N	52	31	196	17	0	3	299	51	59	116	39	34
Cl_ccm_11905	UGAAUGUGUCAUAAUAUCCUA	21	SupFam_18	N	Y	13	20	40	0	0	3	76	11	64	0	1	0
Cl_ccm_11925	GUGUCCCGGUGAACAGUUUUC	21	SupFam_62	N	Y	19	14	31	1	0	0	65	6	59	0	0	0
Cl_ccm_11943	AAAGGAUGGUGGGAAUUCCUUU	22	SupFam_325	ccm-MIR12484	Y	35	28	43	0	0	1	107	7	25	69	3	3
Cl_ccm_11996	GUCUAUGAAUACAUGCAGAUA	21	SupFam_28	ccm-MIR12463a	Y	37	31	37	0	3	3	111	11	98	2	0	0
Cl_ccm_12158	AGAUUGUACAAAGAGAUACUU	21	SupFam_71	N	Y	34	23	64	0	0	1	122	1	63	55	3	0
Cl_ccm_12440	CUAAAUGUAACAUGUUGUUCCC	22	SupFam_138	N	N	33	24	28	0	0	1	86	0	11	74	0	1
Cl_ccm_12450	ACCCAGAGAGUGGAACUGAGACGU	24	SupFam_808	N	N	24	24	19	1	0	1	69	0	0	0	2	67
Cl_ccm_12755	UCGUGUCGGCGGUUCGAUUCCGUC	24	SupFam_809	N	N	39	42	62	0	0	0	143	0	0	16	61	66
Cl_ccm_12788	UGGUGAGACUACAGAGAUAAAA	22	SupFam_326	ccm-MIR12493*	Y	9	19	38	0	0	0	66	1	6	56	1	2
Cl_ccm_12906	AUUACCGAAGCUAUGGAUUUGUA	23	SupFam_810	N	N	7	11	138	1	3	3	163	0	19	78	58	8
Cl_ccm_13108	UAUACCAUGAUUUGCACACCAG	22	SupFam_27	N	Y	18	20	45	0	0	0	83	5	5	57	16	0
Cl_ccm_13133	AGUGUGCAUCUGUAGUGGGAGC	22	SupFam_811	N	N	61	53	77	21	3	3	218	0	25	178	13	2
Cl_ccm_13240	GACGAACUGUACAACCGGCUGUAC	24	SupFam_812	N	N	17	27	29	1	0	0	74	0	0	4	8	62
Cl_ccm_13360	GGUGUGCAAAUUGUGGUAUAGC	22	SupFam_117	N	Y	16	14	37	0	0	0	67	0	3	62	2	0
Cl_ccm_13395	UGACUGAGAAGUUGAGUGCUUUU	23	SupFam_24	N	Y	30	32	35	0	0	0	97	0	0	1	85	11
Cl_ccm_13404	GUUCAACAGGACGUGAAACCACU	23	SupFam_461	N	N	24	61	28	4	2	2	121	0	4	17	76	24
Cl_ccm_13408	GGUGUGCAAAUUGUGGUACA	20	SupFam_117	N	Y	12	27	21	0	0	0	60	57	3	0	0	0
Cl_ccm_13475	CAUUUCUUCUAUCUGGUCAUGC	22	SupFam_327	N	Y	21	16	29	1	1	2	70	2	3	64	1	0
Cl_ccm_13766	GUGGGUGAUAUCCGGUCUGGAUCC	24	SupFam_813	N	N	43	40	52	12	0	1	148	0	0	3	39	106
Cl_ccm_13786	UGGAAGUUCAGGUGUUGGUAC	21	SupFam_11	N	Y	20	16	24	0	2	0	62	2	57	1	2	0
Cl_ccm_14272	UAUGACGGGCUUGAUGAUGGGUGU	24	SupFam_814	N	N	36	35	38	11	0	1	121	0	0	1	59	61
Cl_ccm_14480	CGGUCUCAAUGAAACACUUUG	21	SupFam_815	N	N	10	18	28	1	0	0	57	0	50	4	3	0
Cl_ccm_14720	GCAGAUAUGAAUGUUUUAGAU	21	SupFam_76	N	Y	17	9	28	0	0	0	54	0	53	1	0	0
Cl_ccm_14943	CAUGUGCCCUCUUUCUCCAAU	21	SupFam_2	N	Y	48	19	49	1	1	4	122	6	97	18	1	0
Cl_ccm_15046	GUUAAAAUUCCGGAACUUGG	20	SupFam_816	N	N	13	7	77	0	2	1	100	58	34	8	0	0
Cl_ccm_15094	CGGCGCAUCAUCGACCGAUCCUG	23	SupFam_817	N	N	28	11	87	0	0	0	126	0	3	21	60	42
Cl_ccm_15206	CGUUAAGGGCGUAUGGCGGAUG	22	SupFam_818	N	N	2	8	95	1	1	0	107	25	7	50	14	11
Cl_ccm_15291	CGGUACCGUGUGCACUUCUAGUCC	24	SupFam_819	N	N	26	27	46	2	1	1	103	0	0	1	3	99
Cl_ccm_15293	CUUCAUAGGUUUCUCAUCCAG	21	SupFam_45	N	Y	14	15	21	0	1	0	51	0	48	3	0	0
Cl_ccm_15304	AAAUGAAAGAACACCACAACG	21	SupFam_69	N	Y	33	17	29	0	0	0	79	7	67	2	3	0
Cl_ccm_15312	AAUCCAGGUGUACGGACAGAACA	23	SupFam_462	N	N	36	11	37	2	1	1	88	0	3	3	64	18
Cl_ccm_15377	GAAGUGUGGGCUUUCGGAGAACCA	24	SupFam_820	N	N	30	28	41	4	1	1	105	0	0	3	32	70
Cl_ccm_15441	AGGACAGCAUUUGAGAGGAUU	21	SupFam_198	N	Y	6	16	28	0	0	1	51	2	48	0	1	0
Cl_ccm_15560	GAUGGCUACGUUGCACUGAGUAUA	24	SupFam_122	N	Y	19	13	46	0	0	0	78	0	0	11	19	48
Cl_ccm_15561	UGAGUGGAUGGCAAGAAGUGAG	22	SupFam_17	N	Y	19	15	26	0	0	3	63	2	4	56	1	0
Cl_ccm_15976	CCCUGAGGCGUGAUGACGAUGCA	23	SupFam_821	N	N	29	29	124	7	5	2	196	0	45	57	63	31
Cl_ccm_16379	CAAAUCUGGUUCUUGGCACC	20	SupFam_139	N	N	68	23	54	2	0	1	148	65	50	33	0	0
Cl_ccm_16421	ACUGGAUGUAUAGUGGAGAAACG	23	SupFam_822	N	N	40	50	31	8	1	2	132	0	32	31	50	19
Cl_ccm_16485	GUGGACGACUGCGGCUAUGCUC	22	SupFam_823	N	N	16	214	48	0	2	0	280	15	46	99	75	45
Cl_ccm_16546	UCUUCAAAAUCGCUACAUCUCC	22	SupFam_328	ccm-MIR12481*	Y	25	22	43	0	0	0	90	3	20	66	1	0
Cl_ccm_16643	GCUAUAGACAGCAGGACGGUG	21	SupFam_464	N	N	31	115	59	4	2	0	211	61	70	20	60	0
Cl_ccm_16731	GAUCGGAAUCAACGGAUUUGGAA	23	SupFam_824	N	N	29	32	31	6	1	1	100	0	13	20	46	21
Cl_ccm_17082	CGCCAUUCUUUAUUCGUGACC	21	SupFam_51	N	Y	24	26	32	0	1	3	86	0	80	5	1	0
Cl_ccm_17705	CAUCUUGUACCGCCGUGGCUAUA	23	SupFam_825	N	N	15	9	26	0	1	0	51	0	0	1	50	0
Cl_ccm_17725	AGGACGGUGGCCAUGGAAGUUGG	23	SupFam_826	N	N	8	35	36	2	0	0	81	0	1	4	57	19
Cl_ccm_17824	GUGAUCGGUGUUGACGCAAUG	21	SupFam_827	N	N	6	3	47	0	0	0	56	6	41	3	6	0
Cl_ccm_17830	UAGUUUCUUCCACUCAUGAAAA	22	SupFam_329	N	N	15	17	35	0	1	0	68	1	11	51	3	2
Cl_ccm_18506	GCUUUUACGUGGCUGGUGACGUGU	24	SupFam_828	N	N	13	20	19	0	0	0	52	0	0	2	7	43
Cl_ccm_18605	GAUGUUGAGAUCGAAGUAGUA	21	SupFam_19	N	Y	25	21	29	0	0	0	75	5	67	3	0	0
Cl_ccm_19123	GUGUGCCGGAUUACGUGAGAAUGU	24	SupFam_829	N	N	15	16	16	0	0	0	47	0	0	0	0	47
Cl_ccm_19532	CUGCGGUUGGAUCACCUCCUUA	22	SupFam_830	N	N	18	35	50	8	1	2	114	11	29	41	33	0
Cl_ccm_19612	UUGAAUGAGUGCUUGAAAGCC	21	SupFam_330	N	Y	29	11	20	1	1	0	62	2	59	1	0	0
Cl_ccm_19753	GCUUGCCUGGAGAUAUGGAUGUUG	24	SupFam_465	N	N	11	43	44	0	1	0	99	0	0	31	18	50
Cl_ccm_19953	CGGAAGGACUGGUGGAGCGCU	21	SupFam_466	N	N	84	59	33	0	2	0	178	18	63	56	41	0
Cl_ccm_20057	CAGGAAGAAAGAAAAUGUGUG	21	SupFam_77	N	Y	25	15	14	0	0	0	54	9	41	4	0	0
Cl_ccm_20336	GCGAACACCGGCUGUUGUAUGU	22	SupFam_831	N	N	25	27	62	2	3	1	120	7	3	50	36	24
Cl_ccm_20378	UUUGAACCUGAAUAGUUGACA	21	SupFam_832	N	N	37	55	17	4	3	4	120	25	40	36	19	0
Cl_ccm_20453	GACGUGAUUCUGGAGGCAGACGGA	24	SupFam_833	N	N	19	17	30	2	0	0	68	0	0	0	5	63
Cl_ccm_20614	UGACGGCGGCACGAUCUGAACUGC	24	SupFam_834	N	N	11	20	21	1	0	0	53	0	0	3	0	50
Cl_ccm_20728	GCUAUAGACAGCAGGACGGUGGCC	24	SupFam_464	N	N	6	64	23	1	1	0	95	0	0	5	18	72
Cl_ccm_20928	UCAAGGCCGAGAGCUGAUGACG	22	SupFam_835	N	N	15	10	116	0	0	0	141	11	13	65	28	24
Cl_ccm_21064	AGUCCGGAGACGUCGGCGGGGGCU	24	SupFam_836	N	N	48	18	37	0	0	0	103	0	0	15	39	49
Cl_ccm_21169	CGUAGUGGUGUUCUUUCGUUUU	22	SupFam_199	N	Y	18	5	27	0	0	0	50	3	6	39	2	0
Cl_ccm_21626	GCCCCUAAUAUUAGUAAGAUU	21	SupFam_140	N	Y	9	22	16	0	0	0	47	8	37	1	1	0
Cl_ccm_21710	UCCUAGCAAAGUGUCCUGGUA	21	SupFam_331	ccm-MIR12477*	Y	21	16	11	0	0	0	48	10	38	0	0	0
Cl_ccm_21713	CAGGAAGAAAGAAAAUGUAGA	21	SupFam_77	N	Y	9	7	33	0	1	0	50	1	34	10	5	0
Cl_ccm_21825	UGUGCUGGGAAGAUGUUCAAACC	23	SupFam_837	N	N	9	36	55	0	0	0	100	0	1	16	50	33
Cl_ccm_22208	AGGAAUUGCCACCAUCCUUUUC	22	SupFam_332	ccm-MIR12484*	Y	15	15	16	0	1	0	47	3	7	35	0	2
Cl_ccm_22294	CGCAAGUCUCCUUGGCUAUC	20	SupFam_333	N	Y	26	23	27	0	0	0	76	70	6	0	0	0
Cl_ccm_23740	UACUCAGGCGCGGCGUAGCC	20	SupFam_190	N	Y	17	17	20	0	0	0	54	50	2	2	0	0
Cl_ccm_23769	UGAAUUGUCUCUGAAGCUGACU	22	SupFam_65	N	Y	24	14	22	0	0	0	60	4	11	40	5	0
Cl_ccm_23958	GAUGAGAAAGUGAGGGUUCAAA	22	SupFam_334	N	Y	8	10	23	0	0	0	41	0	3	35	1	2
Cl_ccm_24217	GAAGUGGACGACUGCUGAACCUGC	24	SupFam_838	N	N	17	8	15	0	0	0	40	0	0	0	3	37
Cl_ccm_24240	GGAGCACAUGAAAGACUUAUA	21	SupFam_93	N	Y	18	14	18	0	0	0	50	2	32	16	0	0
Cl_ccm_24284	GAGUGAUGAGGAAGUGGCGU	20	SupFam_12	N	Y	30	16	32	1	0	1	80	42	28	10	0	0
Cl_ccm_24445	CUGUCGGGACCCGAAAGAUGGUA	23	SupFam_467	N	N	37	25	46	0	1	3	112	0	3	10	75	24
Cl_ccm_24468	CACUGUGUGCCUCGUGAUGGAUG	23	SupFam_839	N	N	23	39	46	9	1	1	119	0	1	10	89	19
Cl_ccm_24617	ACAUCGAUGAGAUGAUUCGGC	21	SupFam_7	N	Y	14	10	18	0	0	0	42	3	39	0	0	0
Cl_ccm_24630	AGAGCGGUAGAACAGAGCACCGGC	24	SupFam_840	N	N	14	16	29	0	0	0	59	0	0	1	0	58
Cl_ccm_24909	AGUUCGACUCUGGGUAUCAG	20	SupFam_841	N	N	9	14	24	0	0	0	47	36	10	1	0	0
Cl_ccm_25381	CGGUCAACAUGCAUCUCUGGCAGU	24	SupFam_842	N	N	8	23	22	2	0	0	55	0	0	0	1	54
Cl_ccm_25956	GUUCACCUGAUCCGAUCUGGCUGC	24	SupFam_843	N	N	17	12	9	1	0	0	39	0	0	1	1	37
Cl_ccm_26569	GAAAACUGUUCACUUGGACA	20	SupFam_335	N	Y	15	14	5	0	0	0	34	31	0	3	0	0
Cl_ccm_27265	UGCAUAAAUUCGUAGACUAGA	21	SupFam_1	N	Y	20	19	26	0	1	3	69	23	41	3	2	0
Cl_ccm_27398	AGGCAGCGACUAACAGAGACGUGU	24	SupFam_844	N	N	9	18	20	1	0	0	48	0	0	2	14	32
Cl_ccm_27413	GUGAAGCCGAUGAUGAGAUC	20	SupFam_845	N	Y	21	19	21	1	0	1	63	31	26	6	0	0
Cl_ccm_27519	GCCUGUUUCCCCUAAUGACGCC	22	SupFam_336	N	Y	18	13	23	0	0	0	54	2	4	48	0	0
Cl_ccm_27764	GCCUGACUGGAACUGGCCACC	21	SupFam_846	N	N	12	76	14	0	1	2	105	17	41	24	23	0
Cl_ccm_29065	GUGUCGAACCUCAGAGAGACGUG	23	SupFam_847	N	N	32	49	55	9	1	2	148	0	0	5	118	25
Cl_ccm_29077	AAGAGUGACGAGAAAGUGGCGU	22	SupFam_12	N	Y	21	18	33	0	0	0	72	3	35	28	6	0
Cl_ccm_29241	UAGAUGAAAUGAAUUUGGAGUAU	23	SupFam_337	N	N	12	19	17	0	0	0	48	0	4	6	31	7
Cl_ccm_29769	UCGGGCUGUAGUACGAAACCG	21	SupFam_848	N	N	16	26	8	0	0	1	51	15	31	1	4	0
Cl_ccm_30025	GUUGUCUGUACUGCCGUCUGGCUG	24	SupFam_849	N	N	13	41	28	0	1	1	84	0	0	24	26	34
Cl_ccm_30049	AAAAUGGUAAUCAUGAACCCA	21	SupFam_338	N	N	9	9	13	0	0	0	31	0	31	0	0	0
Cl_ccm_30101	AAUGGAUGGAAAGAAGUGCGU	21	SupFam_17	N	Y	19	10	25	0	0	0	54	2	40	10	2	0
Cl_ccm_30590	GAUAAAGGAGACUAGGAAGUU	21	SupFam_339	N	Y	10	11	20	0	0	0	41	1	34	6	0	0
Cl_ccm_30625	GCGUGCUCCGGGCGUCGGCA	20	SupFam_468	N	N	31	16	25	0	0	0	72	45	26	1	0	0
Cl_ccm_30694	CUCCGAUCGGACCGGUAAAGGUC	23	SupFam_850	N	N	5	9	17	0	0	0	31	0	0	2	28	1
Cl_ccm_31034	CUGCCGGUGGACGACUGCGGC	21	SupFam_851	N	N	19	20	5	0	1	0	45	1	30	14	0	0
Cl_ccm_31175	AGGAUUUCCACUUCUCGAUU	20	SupFam_20	N	Y	6	15	18	0	0	0	39	33	6	0	0	0
Cl_ccm_31199	GCAAGAGUAGGACGUUGCCAGGC	23	SupFam_852	N	N	13	13	61	2	0	2	91	0	6	19	40	26
Cl_ccm_31354	GUGCGAAACGGUCCUGUAAGCAGU	24	SupFam_853	N	N	1	25	38	0	1	0	65	0	0	10	14	41
Cl_ccm_31665	GCCGAGAGCUGAUGACGAGUGC	22	SupFam_854	N	N	6	5	76	0	0	1	88	10	24	37	15	2
Cl_ccm_31699	GGACCGACGCGGAUUACGGUGGU	23	SupFam_469	N	N	25	16	43	0	0	0	84	0	3	20	37	24
Cl_ccm_31912	CGGCUGCGACAGAUGUGAGAGUGU	24	SupFam_855	N	N	12	5	26	0	0	1	44	0	0	4	14	26
Cl_ccm_32208	CCGACGAUCGCGGCGACGUGGG	22	SupFam_856	N	N	39	21	14	0	0	1	75	17	21	30	4	3
Cl_ccm_32463	CGUCCCUACGUCACCAAGUGAUU	23	SupFam_74	N	Y	5	15	9	0	0	0	29	0	0	1	28	0
Cl_ccm_33082	CGGCUCAGCCGGAGGUAGGGUCU	23	SupFam_68	N	N	24	18	40	1	1	1	85	0	9	17	43	16
Cl_ccm_33433	UGAGUCAGUCGGUCCUAAGG	20	SupFam_857	N	N	11	29	49	4	2	0	95	39	32	24	0	0
Cl_ccm_33503	ACCGAUAGUGAAUGGUGGCUU	21	SupFam_340	N	Y	22	15	17	0	0	0	54	4	26	24	0	0
Cl_ccm_35736	UGGGUAUGUGACGGUGAAUA	20	SupFam_858	N	N	13	17	7	0	0	0	37	21	10	6	0	0
Cl_ccm_37570	AAUCACAGGAGAGAAUGAAAAU	22	SupFam_197	N	Y	11	4	11	0	0	0	26	0	4	22	0	0
Cl_ccm_37736	GUUGACCUCGGAUCAGGUAGG	21	SupFam_859	N	N	9	23	23	1	1	0	57	6	30	14	7	0
Cl_ccm_39285	UUUGACAUGAUUUCUGGUCCU	21	SupFam_200	N	N	13	7	21	0	1	0	42	2	38	2	0	0
Cl_ccm_39367	AGUGCCGAAUCUUCUGUAGA	20	SupFam_460	N	N	5	25	4	0	0	0	34	23	9	2	0	0
Cl_ccm_39770	UUCAAAUCUGGUUCUUGGCACCA	23	SupFam_139	N	N	20	12	9	0	0	0	41	0	0	5	29	7
Cl_ccm_40375	UGCCUAAUAUGACUCUUGAA	20	SupFam_860	N	N	12	11	3	0	0	0	26	23	3	0	0	0
Cl_ccm_41601	GGAUGAGAAACCUAGGAAGAC	21	SupFam_141	N	N	4	10	12	0	0	0	26	2	23	1	0	0
Cl_ccm_43255	UUCAUUUCUCGGUAGAACCUCCA	23	SupFam_861	N	N	22	9	22	1	1	0	55	0	0	22	28	5
Cl_ccm_44310	AGGUGAUGUAUUUAUUAGAGC	21	SupFam_862	N	N	3	49	31	0	0	0	83	12	33	29	9	0
Cl_ccm_44580	CCGGAAGGACUGGUGGAGCGCUUA	24	SupFam_466	N	N	13	14	9	0	0	0	36	0	0	0	0	36
Cl_ccm_44668	CAUCGCUGUGCUGGGAAGAUG	21	SupFam_863	N	N	14	35	5	0	0	0	54	13	21	4	16	0
Cl_ccm_44726	CCGGUCGGUACCGAUUCUGGUUCC	24	SupFam_864	N	N	9	7	16	0	0	0	32	0	0	0	2	30
Cl_ccm_45318	UACUAAUUAGACUGAGGCAUCCUC	24	SupFam_865	N	N	26	11	2	0	0	0	39	0	0	1	18	20
Cl_ccm_45991	UGGAUCUGCGUUGGCGCCUGCC	22	SupFam_866	N	N	4	51	5	0	1	0	61	13	1	28	18	1
Cl_ccm_46138	GUGUUCGUAAUUGUAAUGAGUA	22	SupFam_867	N	N	1	25	26	0	0	0	52	7	24	18	3	0
Cl_ccm_46663	UGUUGGGGUUGUAGGACACU	20	SupFam_868	N	N	4	6	45	0	0	1	56	23	21	12	0	0
Cl_ccm_47504	GAACAUGGUGAGCAAGAGAUU	21	SupFam_341	N	Y	9	8	17	0	0	0	34	0	32	2	0	0
Cl_ccm_47856	AUUUGGUGAGACCUUCGGACUG	22	SupFam_869	N	N	14	45	4	0	0	1	64	11	7	21	15	10
Cl_ccm_48305	GUUCGGGGAGGUAGUGACGA	20	SupFam_870	N	N	10	38	20	0	1	1	70	30	17	23	0	0
Cl_ccm_50541	CUAGUCACUGUAACGAUACU	20	SupFam_871	N	N	9	20	23	0	0	0	52	23	20	9	0	0
Cl_ccm_50717	CUGCCUAAUACUUCAAUAGCCA	22	SupFam_342	N	Y	15	12	8	0	0	0	35	3	8	21	0	3
Cl_ccm_50733	AAAGACUUGGCUAUGAGCUCU	21	SupFam_872	N	N	11	5	16	0	0	0	32	0	26	5	1	0
Cl_ccm_50919	AUCAAUUGGAGGACAAGUCUG	21	SupFam_873	N	N	2	8	20	0	0	0	30	4	22	4	0	0
Cl_ccm_51538	UGUACCAUGACUUGCACACC	20	SupFam_27	N	Y	34	17	25	0	2	1	79	58	21	0	0	0
Cl_ccm_51573	UGUUGCUUAAUUGAACGUGGGC	22	SupFam_874	N	N	15	9	18	0	0	0	42	2	4	28	3	5
Cl_ccm_51639	UCCGAUCUGUUACUCCCUCCGUC	23	SupFam_875	N	N	9	8	12	0	0	0	29	0	0	0	22	7
Cl_ccm_52029	UCCGAUGUCGUCCAGCGGUUAGA	23	SupFam_470	N	N	10	11	23	0	0	0	44	0	2	3	37	2
Cl_ccm_52149	UCCGGAACCGGGACGUGGCGA	21	SupFam_876	N	N	15	15	18	0	0	0	48	15	29	2	2	0
Cl_ccm_52592	UCACUUCUUUCCAUCCAUUC	20	SupFam_75	N	Y	7	8	10	0	0	0	25	18	7	0	0	0
Cl_ccm_52943	UGCUGUUGGCAAGGCAAGAGGUGU	24	SupFam_877	N	N	8	13	8	0	0	0	29	0	0	0	12	17
Cl_ccm_53222	GACCGGAAGGACUGGUGGAGC	21	SupFam_878	N	N	36	17	15	0	0	2	70	20	26	18	6	0
Cl_ccm_53987	AUGGAAUAAUGAAAUAGGACUUUG	24	SupFam_879	N	N	2	28	15	0	0	0	45	0	0	18	6	21
Cl_ccm_54377	AGGAUAGAACGGAACGGGGAGGGA	24	SupFam_880	N	N	10	16	18	1	0	0	45	0	0	1	21	23
Cl_ccm_55374	CAGCUUGAAAUGUAGUAUCCUGUU	24	SupFam_52	N	Y	9	23	16	0	1	0	49	0	0	0	4	45
Cl_ccm_55572	UGCCUGGAGAUAUGGAUGUUG	21	SupFam_465	N	N	4	9	27	0	0	0	40	16	19	4	1	0
Cl_ccm_56317	CACAAUGAGGAUUGACAGAUU	21	SupFam_881	N	N	2	20	17	0	0	0	39	10	24	4	1	0
Cl_ccm_56833	CACAAUCUUGUCGGGACGGGAUA	23	SupFam_882	N	N	9	5	14	0	0	0	28	0	0	1	22	5
Cl_ccm_58409	AAUGGACGAUGCUGUAGCGUG	21	SupFam_883	N	N	5	26	34	0	0	0	65	14	18	18	15	0
Cl_ccm_58632	CCUGUAUACAUAGCUUCUCCG	21	SupFam_343	ccm-MIR12467*	Y	10	11	22	0	0	0	43	23	16	2	2	0
Cl_ccm_59682	CUCAGCCGGAGGUAGGGUCU	20	SupFam_68	N	N	10	7	15	0	0	0	32	28	4	0	0	0
Cl_ccm_60338	UACUGCUGUAACUUGGGUUUAUA	23	SupFam_884	N	N	16	12	34	0	0	1	63	0	1	6	47	9
Cl_ccm_60719	GAUCUAGUGGUUGUCUGUACUGCC	24	SupFam_885	N	N	14	21	10	0	0	1	46	0	0	0	19	27
Cl_ccm_64191	CGGCUUCUUAGAGGGACUAUGGCU	24	SupFam_886	N	N	26	14	28	0	0	0	68	0	0	15	15	38
Cl_ccm_64308	CUGGAAUACUUGAACUACCAUCUU	24	SupFam_887	N	N	6	11	17	0	0	0	34	0	0	0	3	31
Cl_ccm_65035	ACACUGAUAAUGUAGAGGUCGGC	23	SupFam_888	N	N	5	7	18	0	0	0	30	0	3	8	18	1
Cl_ccm_65788	GACGGCGGGGGCCCCGAGCA	20	SupFam_889	N	N	1	6	33	0	0	0	40	17	18	5	0	0
Cl_ccm_66627	UCGAAAUUGUGAUCCAGCAGC	21	SupFam_890	N	N	11	7	9	0	0	0	27	0	27	0	0	0
Cl_ccm_67909	ACGUUUACUUUGAAAAAAUUA	21	SupFam_891	N	N	3	14	35	0	0	0	52	6	20	9	17	0
Cl_cpe-2015_3	UGGCAGAAGUAGGAAUCGCAGU	22	SupFam_6	N	Y	14967	23831	29726	294	156	419	69393	125	293	68396	467	112
Cl_cpe-2015_4	CCGGUUCCAUUCUCAUGACGGU	22	SupFam_61	ccm-MIR12492*	Y	14651	21564	29881	218	72	162	66548	346	12276	53542	376	8
Cl_cpe-2015_5	UUUGCAUAAAUUCGUAGACUAG	22	SupFam_1	ccm-MIR12463b	Y	8379	14961	27203	710	437	1705	53395	945	5255	46772	404	19
Cl_cpe-2015_7	UGUACCAUGAUUUGCAGACGAG	22	SupFam_27	N	Y	10739	14220	20701	259	141	279	46339	807	1089	39812	4530	101
Cl_cpe-2015_9	CAGCUUGAAAUGUAGUAUCCU	21	SupFam_52	ccm-MIR12469a	Y	9206	10556	34403	99	108	230	54602	5034	30128	17056	2384	0
Cl_cpe-2015_12	CACGAAUAAAGAAAGGCGACUU	22	SupFam_16	N	Y	10162	10266	15052	273	366	737	36856	731	11622	24085	387	31
Cl_cpe-2015_13	UGUCCCGGUGAACAGUUUUCUU	22	SupFam_62	ccm-MIR12479	Y	4784	6417	8573	273	90	463	20600	139	1175	19126	130	30
Cl_cpe-2015_14	CGUUUGCAAAUCAUGGUACAGC	22	SupFam_117	ccm-MIR12497a	Y	4511	5901	10423	161	235	469	21700	44	367	21174	92	23
Cl_cpe-2015_18	AGGAAACAUAUUGUGGCUCGGC	22	SupFam_15	ccm-MIR12487	Y	4750	6487	8659	102	43	132	20173	36	479	18412	1106	140
Cl_cpe-2015_19	UGUAUCUCUGUUAUUAAAGCUU	22	SupFam_63	N	Y	4338	4774	8390	88	146	345	18081	123	964	16028	833	133
Cl_cpe-2015_20	GAGCAAAUAUGUGAAGAAGAAU	22	SupFam_120	ccm-MIR12491*	Y	3283	3824	7273	51	24	52	14507	183	243	13792	96	193
Cl_cpe-2015_21	AGGAUGGAUGGACUUUGUGAG	21	SupFam_64	N	Y	3172	3984	6315	53	57	99	13680	91	13244	329	16	0
Cl_cpe-2015_22	CGAUCGAGGAGAUGAUGCGCC	21	SupFam_7	N	Y	5518	5160	11701	50	35	89	22553	182	20898	1396	77	0
Cl_cpe-2015_24	CAGCUCGAAUCGUAGUAACCGA	22	SupFam_260	ccm-MIR12469b	Y	3466	4228	6514	123	79	213	14623	115	2397	11949	138	24
Cl_cpe-2015_26	UGCGAUUCCGACUUUUGCCUUA	22	SupFam_50	N	Y	5166	3170	9304	5	7	8	17660	100	2265	11453	3019	823
Cl_cpe-2015_30	UAAGUCGUUCAUGUGCUUCGC	21	SupFam_39	N	Y	3170	4455	4646	79	53	180	12583	54	12337	177	15	0
Cl_cpe-2015_31	GUGAAACUUGGGGGUCUCGUG	21	SupFam_119	ccm-MIR12489*	Y	2500	2928	6465	10	9	16	11928	916	10466	510	36	0
Cl_cpe-2015_32	UUGGACUCUAGUUCUACGCUGC	22	SupFam_149	N	NA	3492	3029	5471	109	101	291	12493	62	199	12002	173	57
Cl_cpe-2015_33	UAACUAGGAGCUCUGCUGCAUU	22	SupFam_679	N	NA	2670	3034	4618	476	285	647	11730	51	613	10796	238	32
Cl_cpe-2015_35	GAGAGGUGGUUGGCGAUUCUAC	22	SupFam_54	N	Y	2369	3188	4959	122	77	292	11007	267	551	9735	444	10
Cl_cpe-2015_36	UUAUCUUUGUAGUCUUGCCAAG	22	SupFam_266	ccm-MIR12493	Y	2417	3095	4443	83	113	253	10404	346	656	9200	184	18
Cl_cpe-2015_37	UGCGAUUCCUGCUUCAGCCAUG	22	SupFam_50	N	Y	1879	2621	5393	3	8	13	9917	30	186	9497	184	20
Cl_cpe-2015_38	CGUCAUUGGAAUGGGAUUGGAU	22	SupFam_262	ccm-MIR12492	Y	2414	3077	4844	122	65	241	10763	234	777	9302	425	25
Cl_cpe-2015_40	UGCAAAUCAUGCCUUUGCCGUG	22	SupFam_680	N	NA	2032	2047	5262	3	5	3	9352	5	134	9163	46	4
Cl_cpe-2015_44	UGAACGGGGAAGAAGACAGAUG	22	SupFam_269	N	Y	1860	2007	4303	15	8	18	8211	39	224	7880	56	12
Cl_cpe-2015_45	CGAGAUCUCUAAUAGAAGCUU	21	SupFam_447	N	NA	1810	2301	4500	22	30	66	8729	351	8072	227	79	0
Cl_cpe-2015_46	CCUGUACGGAGGGAGGACAAC	21	SupFam_40	N	Y	2503	3054	4579	81	39	52	10308	222	9817	204	65	0
Cl_cpe-2015_48	GUCGUCAUUCUUUAUUCGUGGU	22	SupFam_51	N	Y	3394	3171	5048	22	23	24	11682	69	1365	10180	65	3
Cl_cpe-2015_54	CGAGACCCCUGAGUUUCCUCU	21	SupFam_121	N	Y	3104	3425	8708	41	24	111	15413	485	7602	5731	1595	0
Cl_cpe-2015_56	UGGAAAUCAAUUAUGUGGAUU	21	SupFam_289	N	Y	1690	2005	3001	25	64	89	6874	99	6706	57	12	0
Cl_cpe-2015_57	UCCAUAUGUAUUGAGCUGUCUC	22	SupFam_116	ccm-MIR12494b	Y	1919	2262	3394	111	48	161	7895	120	575	7119	46	35
Cl_cpe-2015_58	GAGUGACGAGAAAGUGGCGUA	21	SupFam_12	ccm-MIR12466*	Y	2936	3398	6169	21	3	10	12537	1179	8122	3061	175	0
Cl_cpe-2015_61	UGAAUUGUCCGUGAAGCUGAC	21	SupFam_65	N	Y	1320	1793	3746	43	31	157	7090	114	6417	540	19	0
Cl_cpe-2015_63	AAGUGGUGGAAAAGUUCGAGU	21	SupFam_263	N	Y	1925	1809	2731	186	159	336	7146	113	6980	47	6	0
Cl_cpe-2015_67	GCUCAGGGGCCGAGAUGCAUG	21	SupFam_261	ccm-MIR12496*	Y	1256	1872	2599	22	10	10	5769	86	5516	125	42	0
Cl_cpe-2015_68	AUAUGGAAGAUUGACUAGGUCC	22	SupFam_118	ccm-MIR12483	N	2758	2692	4247	76	76	191	10040	21	558	8342	996	123
Cl_cpe-2015_72	AGAAGCCACUAAGAACUUCACA	22	SupFam_255	N	NA	1173	2041	2621	13	17	30	5895	20	836	4970	28	41
Cl_cpe-2015_73	AGCGGGGAACUAGAGUCCAAGU	22	SupFam_681	N	NA	1544	1609	2659	21	7	21	5861	13	107	5647	78	16
Cl_cpe-2015_74	UGUCUUCUCCUCCGUACAGGGA	22	SupFam_5	N	Y	1259	1233	2353	28	27	71	4971	8	140	4763	39	21
Cl_cpe-2015_76	UGAAAUUCUUGGUGGCAGUCUU	22	SupFam_26	N	Y	1474	1307	3155	19	23	53	6031	57	272	5290	352	60
Cl_cpe-2015_78	UGAUGGAAUGAAGAUGCGGAGUA	23	SupFam_67	N	Y	1952	1852	4351	30	13	33	8231	0	90	2152	5880	109
Cl_cpe-2015_79	AGCGCUGUGGCAGCUAUCUUCU	22	SupFam_276	N	Y	1506	1660	2461	24	12	53	5716	35	240	5411	27	3
Cl_cpe-2015_82	UCUUGGUGAUGUUUGGGACGAC	22	SupFam_21	ccm-MIR12465b	Y	1664	1667	3935	44	30	101	7441	170	142	6822	294	13
Cl_cpe-2015_86	UUUGGAAGUUCAGGUGUUGGUA	22	SupFam_11	ccm-MIR12486*	Y	1167	1375	2583	4	8	9	5146	30	935	4100	60	21
Cl_cpe-2015_90	UGAGGAAUUAUGGAAAGAAGGG	22	SupFam_265	N	Y	1235	1123	2371	2	0	3	4734	89	413	4143	85	4
Cl_cpe-2015_92	UUCAUGAGUGGAAGAAAUUAUG	22	SupFam_290	N	N	1048	1268	1687	21	28	66	4118	27	107	3949	35	0
Cl_cpe-2015_95	UGAAUGGAUGGAAAGAAGUGCG	22	SupFam_17	ccm-MIR12474b	Y	1783	2334	3103	53	14	45	7332	115	2899	4176	129	13
Cl_cpe-2015_97	GUAAAGGACAAUACAAGUGCU	21	SupFam_279	ccm-MIR12470	Y	972	1318	1807	7	8	24	4136	68	4052	15	1	0
Cl_cpe-2015_98	CGAGUGACAAUAUGUUUUCCGU	22	SupFam_9	ccm-MIR12487*	Y	998	1389	1915	24	48	74	4448	40	62	3788	535	23
Cl_cpe-2015_100	AGAAGUGGAAAUCCUUGAGU	20	SupFam_274	N	Y	1450	1321	2403	24	11	35	5244	3738	1486	20	0	0
Cl_cpe-2015_104	CAAUGAGGGUUUGAAGGUUCC	21	SupFam_131	N	Y	1259	553	2379	97	21	142	4451	93	4302	55	1	0
Cl_cpe-2015_105	UGACCUGAGAAUACUUGGCCC	21	SupFam_264	N	N	1798	426	3920	51	10	183	6388	640	5640	101	7	0
Cl_cpe-2015_106	CACAAAGUCUAUCCAUCCUUU	21	SupFam_270	N	Y	906	924	1562	17	28	36	3473	164	3290	16	3	0
Cl_cpe-2015_109	UCUGUCCUCUUCGCCGUUCAUC	22	SupFam_272	N	Y	822	843	1761	23	16	46	3511	15	147	3281	62	6
Cl_cpe-2015_111	AAAUGAUGGUGGGAAUUCCUUU	22	SupFam_325	N	Y	942	1151	1752	40	24	100	4009	44	837	3071	53	4
Cl_cpe-2015_114	UCUGCAUGUAUUCAUAAACAA	21	SupFam_1	ccm-MIR12463a*	Y	616	855	2078	24	15	59	3647	469	2743	305	130	0
Cl_cpe-2015_115	UAGAGCGGAAAGGAUCGUCCAC	22	SupFam_275	ccm-MIR12488	Y	830	897	1637	29	31	72	3496	133	114	3137	93	19
Cl_cpe-2015_121	AGUGGAUGGCAAGAAGUGAGC	21	SupFam_17	ccm-MIR12474a	Y	788	758	1598	8	2	2	3156	41	3079	30	6	0
Cl_cpe-2015_124	UGUCUCUUUUACAAUGCAACGA	22	SupFam_8	N	Y	1113	1202	2151	19	50	121	4656	280	1064	2945	333	34
Cl_cpe-2015_126	CAUGUGCCCUGUUUCUCCACC	21	SupFam_2	ccm-MIR164	Y	960	1374	1751	258	106	180	4629	360	4230	35	4	0
Cl_cpe-2015_128	UCAGUUUCUCCCUCUUUGACCCUC	24	SupFam_277	N	Y	626	879	1568	9	4	12	3098	0	0	13	148	2937
Cl_cpe-2015_129	UGACUGAGAAGUUGAGUGCUA	21	SupFam_24	ccm-MIR12473	Y	894	1016	2452	19	27	52	4460	668	2877	784	131	0
Cl_cpe-2015_137	GGUUAUUACGAUUCGAGCAUGU	22	SupFam_682	N	NA	1340	1362	2564	21	28	42	5357	366	634	2584	1707	66
Cl_cpe-2015_142	CGAACGAGUCGUAGUAUCCUA	21	SupFam_18	N	Y	494	556	1622	7	19	27	2725	421	2133	93	78	0
Cl_cpe-2015_145	UCUGUGCGGAGGAGAGGACGGC	22	SupFam_278	N	Y	772	900	1253	19	9	24	2977	8	421	2451	94	3
Cl_cpe-2015_146	AGCUGCCCCAAGAAUUUCAUA	21	SupFam_123	N	Y	751	1265	2080	20	17	22	4155	241	3821	53	40	0
Cl_cpe-2015_149	GAUGAGAAAGAAAUGAUGAUA	21	SupFam_683	N	NA	505	514	1200	0	2	0	2221	203	1991	22	5	0
Cl_cpe-2015_150	CUCUGCAUCUUCAUUCCAUCUUA	23	SupFam_25	N	Y	707	501	2394	14	10	43	3669	0	89	850	2371	359
Cl_cpe-2015_154	UGUCCUCUCCUCCGUAUAGGUA	22	SupFam_5	ccm-MIR12480	Y	521	592	1146	7	25	31	2322	24	272	1986	27	13
Cl_cpe-2015_156	GUGUAUCUCUGUUAUUAAAGC	21	SupFam_63	N	Y	546	724	1066	33	74	91	2534	34	2378	118	4	0
Cl_cpe-2015_164	UCUUCUUCCCAUAUUUGCUCUA	22	SupFam_3	ccm-MIR12491	Y	876	915	1749	46	40	70	3696	77	1639	1902	19	59
Cl_cpe-2015_174	GGAUAUUACGACACAUUCACA	21	SupFam_60	N	Y	425	424	1318	96	56	132	2451	290	2094	39	28	0
Cl_cpe-2015_176	GGAUAUGUGUUUCAGAAGAAUA	22	SupFam_303	N	N	428	470	1001	0	0	1	1900	18	186	1679	13	4
Cl_cpe-2015_177	UGAGACUGAAGAAGAUUGCCCCC	23	SupFam_267	N	Y	882	681	2514	12	7	26	4122	0	14	834	2860	414
Cl_cpe-2015_191	GAUGUUGAGAUUGAAGUGGUG	21	SupFam_19	ccm-MIR12464	Y	893	805	1473	57	34	17	3279	76	3182	17	4	0
Cl_cpe-2015_192	UUGCUAGAAUAUGAAGAGGUU	21	SupFam_273	ccm-MIR12475	Y	435	513	876	4	3	17	1848	24	1745	71	8	0
Cl_cpe-2015_194	CCCGCACCUGAACUUCCAAAGA	22	SupFam_192	ccm-MIR12486	Y	338	460	881	3	0	0	1682	17	88	1554	14	9
Cl_cpe-2015_197	UAUGAAGGUCUGUUUCCCCAU	21	SupFam_128	N	Y	829	609	1781	30	20	72	3341	63	2269	960	49	0
Cl_cpe-2015_204	GUUGCUACAUUUCAAGCUGGC	21	SupFam_299	ccm-MIR12469a*	Y	441	451	1190	2	6	6	2096	12	2004	62	18	0
Cl_cpe-2015_207	UACUCUAGGUCAAGGUAUCCG	21	SupFam_256	N	NA	451	642	784	27	10	50	1964	47	1869	48	0	0
Cl_cpe-2015_209	CAGCUUCACGGACAAUUCACC	21	SupFam_271	N	Y	485	593	1118	7	2	7	2212	142	2004	61	5	0
Cl_cpe-2015_211	UAUUCUGGUGCAGCGUAACCCUG	23	SupFam_124	N	N	420	419	1386	13	23	42	2303	0	29	378	1649	247
Cl_cpe-2015_215	CGGAUCAUCUCCUCGAUCGUA	21	SupFam_53	N	Y	381	385	915	1	0	0	1682	195	1433	32	22	0
Cl_cpe-2015_216	UCUCUGUGUACUGUAUUUCUU	21	SupFam_127	N	Y	644	517	836	15	22	64	2098	300	1559	211	28	0
Cl_cpe-2015_217	CGAAUCAUCUCUUCCAUCGGG	21	SupFam_53	N	Y	433	457	686	14	13	13	1616	25	1570	18	3	0
Cl_cpe-2015_225	UCGAGCUUUUCCACUACUUCU	21	SupFam_194	N	Y	508	426	697	20	23	36	1710	35	1661	13	1	0
Cl_cpe-2015_227	CCCGGACACUUUGCAAGGAAA	21	SupFam_70	ccm-MIR12477	Y	352	382	830	0	0	1	1565	158	1372	27	8	0
Cl_cpe-2015_228	UGGCAAAAGUACAAAUCGCAAU	22	SupFam_6	N	Y	407	268	1131	4	0	1	1811	17	43	1513	205	33
Cl_cpe-2015_229	UGCGGUCACAUUUGCUACUAGA	22	SupFam_66	N	Y	369	499	625	7	6	24	1530	6	92	1396	18	18
Cl_cpe-2015_233	GAGAUUGCUGAAAAAGAAGAA	21	SupFam_125	ccm-MIR12468	Y	367	506	734	11	12	10	1640	226	1371	43	0	0
Cl_cpe-2015_235	UACCUCUGUCAUCAGGGUCACC	22	SupFam_439	N	NA	408	396	1042	19	23	39	1927	6	7	1845	59	10
Cl_cpe-2015_237	GCGAUGCGAUCCCUAUGGACG	21	SupFam_13	N	Y	526	527	692	5	15	40	1805	35	1596	168	6	0
Cl_cpe-2015_244	AAAAUACAGUACAUAGAGAGC	21	SupFam_296	ccm-MIR12478	Y	471	495	681	13	3	17	1680	23	1628	24	5	0
Cl_cpe-2015_257	UGCUGUCAUAUUUGCUACUGGG	22	SupFam_66	N	Y	355	423	1007	1	0	1	1787	50	215	1424	90	8
Cl_cpe-2015_265	CACGUGCCAUGUUUCUCCAUC	21	SupFam_2	N	Y	547	896	1040	111	46	46	2686	880	1793	12	1	0
Cl_cpe-2015_266	GGAAUCACCAACCAUCUCUCUU	22	SupFam_306	ccm-MIR12476b*	Y	364	355	710	7	21	24	1481	19	96	1353	12	1
Cl_cpe-2015_270	GUCUAUGAAUACAUGCAGAUA	21	SupFam_28	ccm-MIR12463a	Y	384	429	1740	6	9	17	2585	392	2169	16	8	0
Cl_cpe-2015_274	UUCAGUUUCUUAACAGCAAUU	21	SupFam_320	N	Y	524	368	605	7	13	16	1533	222	1289	21	1	0
Cl_cpe-2015_279	GACAACUCUAUACAUAUGGACA	22	SupFam_268	N	Y	402	441	636	10	4	4	1497	6	276	1184	7	24
Cl_cpe-2015_283	CGAUGGAGGAGAUGAUACGCU	21	SupFam_7	N	Y	603	296	722	16	6	29	1672	32	1616	23	1	0
Cl_cpe-2015_284	AAUGAAAGAACACCACAACGUU	22	SupFam_69	N	Y	373	395	677	16	19	30	1510	6	171	1321	4	8
Cl_cpe-2015_285	UCCUAUCCUUUGCAUCAUCGU	21	SupFam_684	N	NA	544	511	355	20	7	13	1450	17	1313	119	1	0
Cl_cpe-2015_288	CACUUGUAUUGUCUUUUGCUU	21	SupFam_288	ccm-MIR12470*	Y	327	353	651	13	8	17	1369	41	1298	26	4	0
Cl_cpe-2015_292	UUCUUCUGAAACACAGAUCCAU	22	SupFam_302	N	N	398	341	621	5	13	26	1404	28	38	1265	63	10
Cl_cpe-2015_293	UGCAUCUCCGCCUCCUGAGCAC	22	SupFam_282	ccm-MIR12496	Y	326	349	896	5	2	8	1586	62	63	1342	101	18
Cl_cpe-2015_295	UGUGGUGAAGCCGAUGAUGAGA	22	SupFam_292	N	Y	447	432	703	9	4	2	1597	21	438	1123	6	9
Cl_cpe-2015_311	UAAAAAGAUAUUAGCUCUUCUU	22	SupFam_309	N	N	308	375	565	10	9	19	1286	14	27	1192	53	0
Cl_cpe-2015_312	UGAACAUGUCAUAGUAUCCCA	21	SupFam_18	N	Y	281	384	650	4	10	22	1351	150	1146	33	22	0
Cl_cpe-2015_316	UCACGUAAAGCUUUCCAUCCAU	22	SupFam_281	N	Y	457	426	637	19	12	30	1581	48	212	1129	180	12
Cl_cpe-2015_317	GGAUGGAAAGCUUUACGUGAUU	22	SupFam_311	N	Y	659	431	714	3	3	1	1811	23	457	1149	72	110
Cl_cpe-2015_322	UUAGGACAAACAUUUGAGAGAC	22	SupFam_35	ccm-MIR12482	Y	353	397	660	30	21	28	1489	15	255	1166	31	22
Cl_cpe-2015_324	GGAUAUCUUGACCUAGAGUAGC	22	SupFam_685	N	NA	508	652	739	8	5	3	1915	12	562	1300	28	13
Cl_cpe-2015_329	UCAAGGAUUUCCACUUCUCG	20	SupFam_20	N	Y	453	469	775	7	7	24	1735	1184	246	305	0	0
Cl_cpe-2015_332	UCUUACUAAUAUUAGGGACUC	21	SupFam_129	N	Y	490	452	969	14	34	30	1989	55	1802	126	6	0
Cl_cpe-2015_333	AGUUUAUGAAUUUAUGCAAAUA	22	SupFam_28	ccm-MIR12463b*	Y	230	281	750	11	10	16	1298	42	241	980	30	5
Cl_cpe-2015_336	GGGCAUGGGGGAAAAACUGAAA	22	SupFam_284	N	Y	187	388	499	1	0	0	1075	26	102	924	21	2
Cl_cpe-2015_349	GCCUGGUUGUUAAACUUGAAU	21	SupFam_686	N	NA	291	375	549	10	0	2	1227	30	1067	105	25	0
Cl_cpe-2015_358	CUACUUCAAUCUCAACAUCUU	21	SupFam_287	ccm-MIR12464*	Y	510	397	548	28	32	44	1559	43	1028	472	16	0
Cl_cpe-2015_360	UGAAGGCAGCCAGAUGAGCAU	21	SupFam_280	N	Y	325	363	515	6	4	15	1228	36	1182	8	2	0
Cl_cpe-2015_368	CUGUGUAGGUAAUUUAACCCUC	22	SupFam_49	ccm-MIR12485	Y	396	277	514	2	17	13	1219	3	156	1027	30	3
Cl_cpe-2015_371	CUUCUUUCCGUACUUCCUCCGU	22	SupFam_3	N	Y	288	273	626	8	13	21	1229	29	139	1006	47	8
Cl_cpe-2015_377	GGAUACUAUGACUUGUUCAU	20	SupFam_60	N	Y	249	191	1039	2	0	2	1483	966	436	81	0	0
Cl_cpe-2015_381	UGAAUGUGUCAUAAUAUCCUA	21	SupFam_18	N	Y	253	260	543	3	22	15	1096	179	869	32	16	0
Cl_cpe-2015_399	UGCUUAUGUUGUUAAACUUGGA	22	SupFam_308	N	N	256	240	413	4	1	2	916	6	53	807	45	5
Cl_cpe-2015_419	GUCGCCAUUCUUUAUUCGUGA	21	SupFam_51	N	Y	265	344	465	2	5	5	1086	163	849	65	9	0
Cl_cpe-2015_426	AAGAUGGUUGCCACAGCACUCC	22	SupFam_300	N	Y	269	402	498	1	6	7	1183	2	87	1079	15	0
Cl_cpe-2015_429	UCAUCAUCGGCUUCACCACAGA	22	SupFam_297	N	Y	188	261	412	5	4	17	887	9	110	761	3	4
Cl_cpe-2015_439	CACUCUGGAUCUAAGUAACCAA	22	SupFam_257	N	NA	511	769	964	41	19	44	2348	62	244	1211	802	29
Cl_cpe-2015_449	GAGAAAGUAUGGCAAAAAGUU	21	SupFam_22	N	Y	195	278	422	2	1	0	898	43	780	72	3	0
Cl_cpe-2015_466	CAGCAGCAAAUUUGACAGCAUG	22	SupFam_133	N	Y	342	324	638	10	18	16	1348	30	102	1171	41	4
Cl_cpe-2015_498	UUACCUUUUAAUUUGAACCUU	21	SupFam_191	N	N	284	274	519	14	9	28	1128	39	940	146	3	0
Cl_cpe-2015_524	CUUCUUUUUCAGCAGUCUCUC	21	SupFam_310	ccm-MIR12468*	Y	224	244	318	7	7	34	834	58	767	6	3	0
Cl_cpe-2015_526	ACCAUGAUUUGCAGACGAGU	20	SupFam_27	N	Y	180	328	482	3	3	2	998	866	121	11	0	0
Cl_cpe-2015_534	GAGAGAUGGUGGAUGAAUCUAC	22	SupFam_54	N	Y	165	266	393	2	1	7	834	35	76	706	14	3
Cl_cpe-2015_537	UGAACCUUCACUUUCUCAUCUC	22	SupFam_312	N	Y	227	198	326	14	18	14	797	6	22	739	10	20
Cl_cpe-2015_544	CGCCACUUCUUCGUCACUCCC	21	SupFam_73	N	Y	692	545	1235	9	18	21	2520	78	1583	816	43	0
Cl_cpe-2015_558	UGAAAUUCCUGGUGGCAAGUUU	22	SupFam_26	N	Y	212	215	682	3	1	6	1119	23	144	667	200	85
Cl_cpe-2015_560	CAGCUUGAAAUGUAGUAUCCUUUU	24	SupFam_52	N	Y	284	167	905	2	0	1	1359	0	0	32	102	1225
Cl_cpe-2015_561	GUUAAGAGUGUCGUUUGUGGAU	22	SupFam_283	N	Y	193	208	319	1	0	0	721	11	22	660	8	20
Cl_cpe-2015_569	GUGAACAUCAUCCACUACACG	21	SupFam_114	N	Y	189	178	348	0	6	12	733	8	707	16	2	0
Cl_cpe-2015_585	CGUCCCUACGUCACCAAGUGA	21	SupFam_74	ccm-MIR12465b*	Y	350	275	872	1	1	1	1500	492	611	204	193	0
Cl_cpe-2015_592	AAGCCAAGGAUGAAUUGCCGU	21	SupFam_72	N	Y	283	276	469	3	4	8	1043	55	978	9	1	0
Cl_cpe-2015_612	UAGUUUCACCCACCGUCUCUC	21	SupFam_135	ccm-MIR12476a	Y	142	216	318	2	7	16	701	14	657	26	4	0
Cl_cpe-2015_614	GGAUGAUCCUUUCUGCUCUCAU	22	SupFam_195	ccm-MIR12488*	Y	483	458	804	5	2	4	1756	114	392	653	547	50
Cl_cpe-2015_652	UCCGUCCGGAAAUGUUCUUCC	21	SupFam_687	N	NA	221	229	377	10	29	22	888	13	835	36	4	0
Cl_cpe-2015_656	UUUUGAACCUUGAGUACCUUC	21	SupFam_688	N	NA	125	171	246	10	4	15	571	0	563	7	1	0
Cl_cpe-2015_658	UUCACAUAAUUGAUUUCCGGC	21	SupFam_324	N	Y	222	198	291	0	1	0	712	10	655	44	3	0
Cl_cpe-2015_676	UGGAUCAAUAGCUUCAAGCCAAU	23	SupFam_188	N	NA	373	428	639	8	9	20	1477	0	383	464	603	27
Cl_cpe-2015_677	CGUCCGGACAUCAGCAAAUA	20	SupFam_126	N	N	210	192	636	1	1	0	1040	766	139	135	0	0
Cl_cpe-2015_730	GAGAUUGUACAAAGAGAUACUU	22	SupFam_71	N	Y	500	599	842	8	7	12	1968	34	329	1090	511	4
Cl_cpe-2015_764	UACAUCUUUUUCCUACGAGCUU	22	SupFam_305	N	Y	124	131	335	1	3	13	607	3	24	553	25	2
Cl_cpe-2015_769	GCUUCUGCCAGAGAUCUCGGG	21	SupFam_689	N	NA	107	170	315	0	0	0	592	26	514	52	0	0
Cl_cpe-2015_784	UCACGAAUAAAGAAAGGCGAC	21	SupFam_16	N	Y	175	176	250	11	6	19	637	58	545	34	0	0
Cl_cpe-2015_804	UGAUCCUGAUGACAAGGGUAUG	22	SupFam_444	N	NA	98	112	296	0	4	0	510	11	17	466	14	2
Cl_cpe-2015_842	UAAGUCACCUGCAACGUUUCC	21	SupFam_313	N	Y	146	141	359	0	1	4	651	36	575	35	5	0
Cl_cpe-2015_846	GAUGAUGCAAAAGAUAGGAUU	21	SupFam_690	N	NA	232	286	202	10	2	3	735	29	476	223	7	0
Cl_cpe-2015_849	CGUCACCAGGGUGAACAGGUCC	22	SupFam_317	N	Y	187	225	246	11	5	15	689	11	31	635	11	1
Cl_cpe-2015_859	UUGAAUGAGUGCUUGAAAGCC	21	SupFam_330	N	Y	179	199	230	10	6	16	640	8	632	0	0	0
Cl_cpe-2015_866	GGAGCACAUGAAAGACUUAUA	21	SupFam_93	N	Y	150	118	244	0	0	0	512	30	427	51	4	0
Cl_cpe-2015_894	CUAAAUGUAACAUGUUGUUCCC	22	SupFam_138	N	N	229	180	296	2	13	15	735	5	89	633	8	0
Cl_cpe-2015_912	CUGCCUAAUACUUCAAUAGCCA	22	SupFam_342	N	Y	134	146	252	3	10	14	559	24	102	424	7	2
Cl_cpe-2015_919	GGGUUAAAUUGUCUACGCAGUG	22	SupFam_130	ccm-MIR12485*	Y	183	114	266	0	0	0	563	6	106	431	19	1
Cl_cpe-2015_929	UCCUAGCAAAGUGUCCUGGUA	21	SupFam_331	ccm-MIR12477*	Y	135	115	215	1	4	1	471	67	395	6	3	0
Cl_cpe-2015_943	CUUUUUGCCGUAUUUUCUCCG	21	SupFam_3	N	Y	106	170	246	3	3	23	551	19	472	57	3	0
Cl_cpe-2015_953	UACUCAGGCGCGGCGUAGCCAUU	23	SupFam_190	N	Y	167	181	466	6	4	7	831	0	9	350	433	39
Cl_cpe-2015_966	UCGACAUGUUUCAAGGCACGU	21	SupFam_691	N	NA	156	115	201	2	2	6	482	3	472	7	0	0
Cl_cpe-2015_969	AAGAAUAUUUCUGGACGGAGG	21	SupFam_286	N	N	108	115	240	8	6	8	485	7	451	18	9	0
Cl_cpe-2015_998	ACGAAUAAAGAAAGGUGACU	20	SupFam_16	N	Y	337	353	644	8	8	10	1360	517	762	81	0	0
Cl_cpe-2015_1030	AAGCGUUGUUGGUGACUCGUU	21	SupFam_315	N	Y	187	181	705	0	2	4	1079	308	702	48	21	0
Cl_cpe-2015_1077	UCUGCAUGUAUUCGUACACCA	21	SupFam_1	N	Y	96	184	188	1	0	1	470	89	379	2	0	0
Cl_cpe-2015_1105	UCAAGGAUUUCCACUUCUCGAUU	23	SupFam_20	N	Y	211	114	220	4	1	0	550	0	26	84	406	34
Cl_cpe-2015_1116	CAUUUCUUCUAUCUGGUCAUGC	22	SupFam_327	N	Y	183	130	170	5	17	8	513	19	40	442	10	2
Cl_cpe-2015_1120	UUGGAAAUCUAGAGCCAAGAAU	22	SupFam_692	N	NA	154	97	226	0	2	9	488	29	28	387	35	9
Cl_cpe-2015_1157	UCUUCAGGUGACCAUAAUCCAU	22	SupFam_693	N	NA	162	83	172	4	2	4	427	12	21	388	6	0
Cl_cpe-2015_1186	GGGCAAUCUUAGCAGUCUUGAC	22	SupFam_298	N	Y	115	109	413	1	0	0	638	6	185	395	48	4
Cl_cpe-2015_1222	GCAGAUAUGGAUGUUUUAGAU	21	SupFam_76	N	Y	296	138	183	1	0	0	618	16	367	231	4	0
Cl_cpe-2015_1260	UAUCUCUGUGUACAAUCUUCCU	22	SupFam_134	N	Y	238	170	310	3	0	5	726	7	48	415	198	58
Cl_cpe-2015_1327	GAAAACAUAUUGUUGCUCGAC	21	SupFam_15	N	Y	134	133	183	1	0	1	452	6	386	56	4	0
Cl_cpe-2015_1334	AGGUGUACGGACAGAACGAAGAGA	24	SupFam_456	N	N	91	96	117	21	1	25	351	0	0	5	31	315
Cl_cpe-2015_1347	CACUUCUUUCCAUCCAUUCAC	21	SupFam_75	N	Y	178	148	322	1	5	14	668	12	606	47	3	0
Cl_cpe-2015_1354	GAGUGAUGAGGAAGUGGCGU	20	SupFam_12	N	Y	185	152	305	1	0	1	644	345	188	111	0	0
Cl_cpe-2015_1361	AAGGUCAGAUAGAAGAAAUGGA	22	SupFam_294	N	Y	140	208	118	0	0	0	466	9	126	325	4	2
Cl_cpe-2015_1405	GGGAAACUUGGAGGAUUCAAG	21	SupFam_307	N	Y	77	85	141	0	0	0	303	4	293	6	0	0
Cl_cpe-2015_1417	AGUCCUCUCCUCCGUAUAGACA	22	SupFam_5	N	Y	68	93	161	4	8	17	351	2	20	309	18	2
Cl_cpe-2015_1465	ACUUAGUCAAUCUUCCAUAACU	22	SupFam_321	ccm-MIR12483*	N	182	184	235	0	2	1	604	4	166	326	80	28
Cl_cpe-2015_1494	UAGUUUCUUCCACUCAUGAAAA	22	SupFam_329	N	N	91	105	155	3	2	3	359	10	53	281	9	6
Cl_cpe-2015_1496	CGGCAAAAGUAUGAUUUGCAAU	22	SupFam_6	N	Y	96	65	155	0	4	3	323	6	9	301	5	2
Cl_cpe-2015_1504	CGAGACCCCUGAGUUUCCUCUUUU	24	SupFam_121	N	Y	117	54	298	0	0	0	469	0	0	4	83	382
Cl_cpe-2015_1521	AGGACAGCAUUUGAGAGGAUU	21	SupFam_198	N	Y	84	61	199	0	0	0	344	12	311	19	2	0
Cl_cpe-2015_1586	UCUUUGAAUCAAUUCAUGCAU	21	SupFam_694	N	NA	108	88	122	2	7	12	339	8	293	35	3	0
Cl_cpe-2015_1646	UUAUUUAGGACAAACAUUUGAG	22	SupFam_319	N	Y	93	138	152	13	17	18	431	21	103	276	11	20
Cl_cpe-2015_1694	GGCUACGUUGCACUGAGUAUA	21	SupFam_122	ccm-MIR12495*	Y	66	83	143	0	0	0	292	21	256	2	13	0
Cl_cpe-2015_1703	AGCAAUGCUAUCCUUUGGACG	21	SupFam_695	N	NA	80	90	131	1	2	16	320	3	302	12	3	0
Cl_cpe-2015_1760	CCUUAUUUCAAACCGGUACUC	21	SupFam_696	N	NA	120	76	251	0	0	0	447	30	310	90	17	0
Cl_cpe-2015_1799	GGAUGAGAAACCUAGGAAGAC	21	SupFam_141	N	N	97	72	125	0	0	0	294	10	273	10	1	0
Cl_cpe-2015_1828	AAAAUGGUAAUCAUGAACCCA	21	SupFam_338	N	N	64	75	195	0	0	0	334	31	300	3	0	0
Cl_cpe-2015_1845	UGUAGUGGAUGUUGUUCAUCA	21	SupFam_697	N	NA	82	46	207	0	3	3	341	69	240	13	19	0
Cl_cpe-2015_1871	UGGCGUGAAGCCAUUGAUCCAUG	23	SupFam_38	N	NA	82	68	189	1	1	0	341	0	18	32	286	5
Cl_cpe-2015_1877	UAGCAUCUGUGCCUUCCAAAG	21	SupFam_314	N	Y	100	105	112	2	12	9	340	3	257	61	19	0
Cl_cpe-2015_1889	GGACCUAAUAUUAGUAAGAGU	21	SupFam_140	N	Y	101	96	75	0	0	0	272	2	270	0	0	0
Cl_cpe-2015_1909	UCAUCAUUGCUUUCUCAUCAA	21	SupFam_45	N	Y	83	78	139	0	0	4	304	55	236	11	2	0
Cl_cpe-2015_1927	GCUCGUCUGGCUGCUUUCACA	21	SupFam_293	N	Y	107	100	157	0	0	0	364	32	329	3	0	0
Cl_cpe-2015_1967	AUUUCUUGUUCAUCAUAUUCC	21	SupFam_137	N	Y	90	90	168	4	6	6	364	7	342	13	2	0
Cl_cpe-2015_1981	GUUGUAUUGUAAAAGAGACAAG	22	SupFam_698	N	NA	75	93	124	0	4	0	296	34	6	244	6	6
Cl_cpe-2015_2030	UGAAUCCUCUAAGUUUCUUCCU	22	SupFam_81	N	NA	97	73	129	1	7	4	311	3	22	277	8	1
Cl_cpe-2015_2139	GCCCCUAAUAUUAGUAAGAUU	21	SupFam_140	N	Y	111	84	233	1	1	2	432	134	294	3	1	0
Cl_cpe-2015_2178	UUUGCAUAUAUUCAUAUACCA	21	SupFam_1	N	Y	53	39	184	0	0	0	276	58	215	0	3	0
Cl_cpe-2015_2208	GCAGAAUGUAAUGCUUUAGAU	21	SupFam_76	N	Y	125	56	77	0	0	1	259	16	236	7	0	0
Cl_cpe-2015_2273	GGCGAGACAGUCAAUGAGAUA	21	SupFam_699	N	NA	75	73	94	0	1	2	245	10	215	18	2	0
Cl_cpe-2015_2616	UAGCCAAGGAUGAUUUGCCGUU	22	SupFam_72	N	Y	67	50	99	2	0	0	218	1	0	208	8	1
Cl_cpe-2015_2624	CCAAGGUCAUCCAAGUUUGUU	21	SupFam_304	N	Y	87	65	95	0	1	3	251	28	200	20	3	0
Cl_cpe-2015_2639	CGCCAUUCUUUAUUCGUGACC	21	SupFam_51	N	Y	58	91	119	1	2	2	273	4	265	2	2	0
Cl_cpe-2015_2642	CAGGAAGAAAGAAAAUGUGUG	21	SupFam_77	N	Y	94	56	80	1	0	1	232	28	195	8	1	0
Cl_cpe-2015_2671	UGUCUCUUUUACAAUGCAACGUUU	24	SupFam_8	N	Y	121	117	213	1	2	3	457	0	0	14	145	298
Cl_cpe-2015_2706	UCCAUAUGUAUUGAGCUGUUGG	22	SupFam_116	N	Y	78	57	96	0	7	7	245	6	4	203	6	26
Cl_cpe-2015_2719	CGUAGUGGUGUUCUUUCGUUUU	22	SupFam_199	N	Y	63	57	93	4	1	8	226	2	24	197	1	2
Cl_cpe-2015_2732	UACAUUUUCUUUCUUCUUGCU	21	SupFam_700	N	NA	94	42	131	1	5	20	293	8	255	28	2	0
Cl_cpe-2015_2738	GCACUCAAUUUCUCAGUCAUC	21	SupFam_48	ccm-MIR12473*	Y	39	54	105	2	0	0	200	3	192	4	1	0
Cl_cpe-2015_2948	GGAGAAACUGACCUUCAUAUA	21	SupFam_169	N	NA	52	28	146	0	0	0	226	34	179	3	10	0
Cl_cpe-2015_3007	CGAGAGAGAAGGGGUAUCCGA	21	SupFam_323	N	N	47	55	76	2	3	10	193	26	164	1	2	0
Cl_cpe-2015_3022	GCGCUCAACUUCUCAGUGACC	21	SupFam_48	N	Y	74	67	125	0	0	0	266	6	253	6	1	0
Cl_cpe-2015_3144	AUGUGAAAGCAUUCUGGAUCUA	22	SupFam_196	N	Y	59	90	109	1	1	3	263	17	71	165	5	5
Cl_cpe-2015_3350	GGGCUCAUAGCUCAGUGGUAGAGU	24	SupFam_701	N	NA	87	110	51	0	0	0	248	0	0	3	2	243
Cl_cpe-2015_3457	UAAAGGAUGGAUGGACUUUGUG	22	SupFam_64	N	Y	95	112	181	2	1	1	392	4	137	209	22	20
Cl_cpe-2015_3486	UCCCAAAUGUAGACAAUUUU	20	SupFam_678	N	NA	215	194	109	3	3	5	529	262	226	41	0	0
Cl_cpe-2015_3535	CAGGAAGAAAGAAAAUGUAGA	21	SupFam_77	N	Y	58	33	86	0	1	2	180	1	139	36	4	0
Cl_cpe-2015_3546	CAGGAGCUAUGUAUGCAGGGA	21	SupFam_301	ccm-MIR12467	Y	46	52	86	1	2	4	191	16	146	29	0	0
Cl_cpe-2015_3561	GCCAAGUAUUCUCACAGUCACU	22	SupFam_702	N	NA	86	23	146	0	0	0	255	5	64	183	2	1
Cl_cpe-2015_3603	CUUCAUAGGUUUCUCAUCCAG	21	SupFam_45	N	Y	56	39	73	0	1	2	171	4	156	10	1	0
Cl_cpe-2015_3628	UUUAAUAACAAAGAUACAGCGU	22	SupFam_448	N	NA	97	90	171	7	21	12	398	42	146	198	9	3
Cl_cpe-2015_3652	GGCAAUUCUUCCCUUGGUUUCU	22	SupFam_316	N	N	55	49	104	0	0	0	208	2	37	166	2	1
Cl_cpe-2015_3680	CGUCUCUUUUACAAUGCAACAG	22	SupFam_8	N	Y	68	38	46	5	1	5	163	11	3	147	2	0
Cl_cpe-2015_3720	GAUGUUGAGAUCGAAGUAGU	20	SupFam_19	N	Y	72	52	333	0	0	0	457	184	251	22	0	0
Cl_cpe-2015_3735	UGCAGCAUAGCCCUAGUUAAU	21	SupFam_703	N	NA	57	31	75	2	3	7	175	5	152	12	6	0
Cl_cpe-2015_3879	AGUCCUCGUGUUGCAUCCCC	20	SupFam_1284	N	NA	176	190	93	25	33	11	528	388	29	111	0	0
Cl_cpe-2015_3898	CGCUUGUUAGAUCUUGCGUUCCUU	24	SupFam_704	N	NA	53	65	68	0	0	0	186	0	0	0	35	151
Cl_cpe-2015_4013	AUCUCUCAAAUGUUUGUCCCG	21	SupFam_14	N	NA	67	36	134	0	0	0	237	12	178	45	2	0
Cl_cpe-2015_4029	AGUAGAAUGGAAUGCUUCAAA	21	SupFam_322	N	Y	55	34	62	1	0	1	153	13	126	5	9	0
Cl_cpe-2015_4172	CCAUACACGCCACUUUUAACAU	22	SupFam_318	N	Y	41	52	61	0	1	4	159	8	12	136	1	2
Cl_cpe-2015_4190	UGGAUCAAUAGCUUCAAGCC	20	SupFam_188	N	NA	56	75	125	0	0	5	261	223	38	0	0	0
Cl_cpe-2015_4205	UGCUCACUAUCUUCUGUCAUA	21	SupFam_705	N	NA	79	37	43	0	1	5	165	13	148	2	2	0
Cl_cpe-2015_4230	GUGUCCCGGUGAACAGUUUUC	21	SupFam_62	N	Y	31	50	63	1	0	2	147	15	132	0	0	0
Cl_cpe-2015_4319	UUACCGGUUUGAGAUAGGGUA	21	SupFam_706	N	NA	43	44	91	1	3	1	183	43	130	8	2	0
Cl_cpe-2015_4343	GGACAAUCAUUUGAGAGAAUA	21	SupFam_35	N	Y	39	34	111	0	0	0	184	9	142	31	2	0
Cl_cpe-2015_4436	CAGUCCGACGAUCGAGCUCCA	21	SupFam_707	N	NA	108	220	97	5	23	28	481	212	179	78	12	0
Cl_cpe-2015_4529	GUGCCAUGAAACAUGUCGAGC	21	SupFam_708	N	NA	42	57	80	0	0	0	179	5	167	7	0	0
Cl_cpe-2015_4532	GUGAAACUUGGGUGUCAUGC	20	SupFam_119	N	Y	22	16	108	1	1	0	148	130	5	13	0	0
Cl_cpe-2015_4749	UCUCUCAAAUGUCUGUCCUUA	21	SupFam_14	N	NA	40	40	50	1	0	2	133	11	118	1	3	0
Cl_cpe-2015_4852	UUUGCAUAAAUUCGUAGACC	20	SupFam_1	N	Y	27	37	110	2	0	2	178	176	1	1	0	0
Cl_cpe-2015_5218	CAUUCAAGCAAAACUAAACCG	21	SupFam_167	N	NA	34	51	69	3	2	6	165	13	147	5	0	0
Cl_cpe-2015_5311	GAUGAGAAAGUGAGGGUUCAAA	22	SupFam_334	N	Y	44	60	71	1	5	3	184	7	19	102	23	33
Cl_cpe-2015_5395	ACCGAUAGUGAAUGGUGGCUU	21	SupFam_340	N	Y	65	56	79	1	3	3	207	17	131	55	4	0
Cl_cpe-2015_5397	GCUUGAAGCUAUUGAUCCAUG	21	SupFam_38	N	NA	29	35	72	2	2	3	143	8	125	9	1	0
Cl_cpe-2015_5399	UAUGUAACAAUUUUGAAGAAU	21	SupFam_285	N	Y	58	59	105	1	6	3	232	2	116	109	5	0
Cl_cpe-2015_5845	CUCUCAAAUGAUUGUCCUAAAU	22	SupFam_709	ccm-MIR12482*	NA	35	37	62	2	5	6	147	3	33	104	7	0
Cl_cpe-2015_6033	UCAAAUCUGGUUCUUGGCACCA	22	SupFam_139	N	N	125	148	35	3	1	2	314	91	40	106	77	0
Cl_cpe-2015_6648	AUGUGCCAUGGUUCUCCAUC	20	SupFam_2	N	Y	31	55	84	10	2	4	186	107	72	7	0	0
Cl_cpe-2015_6728	AAAUGAAAGAACACCACAACG	21	SupFam_69	N	Y	40	40	104	3	0	2	189	65	121	3	0	0
Cl_cpe-2015_6746	GGAUAUUAUGACAUGUUCAUG	21	SupFam_60	N	Y	21	25	49	0	0	0	95	2	90	1	2	0
Cl_cpe-2015_6806	UGAGUGGAUGGCAAGAAGUGAG	22	SupFam_17	N	Y	36	46	57	2	0	3	144	7	2	133	1	1
Cl_cpe-2015_6926	UUGGAAGCCACAGAUGCAAGC	21	SupFam_710	N	NA	35	37	67	1	1	4	145	3	115	23	4	0
Cl_cpe-2015_7036	GCCUGUUUCCCCUAAUGACGCC	22	SupFam_336	N	Y	53	44	54	0	0	0	151	4	8	137	2	0
Cl_cpe-2015_7175	AGCCUUCAAACCCUUGUUGAA	21	SupFam_711	N	NA	28	13	72	0	1	1	115	26	85	4	0	0
Cl_cpe-2015_7394	AGAGUGACGAGAAAGUGGCGC	21	SupFam_12	N	Y	52	28	108	1	0	0	189	25	116	48	0	0
Cl_cpe-2015_7464	AGUUUCACCCACCGUCUCUCCU	22	SupFam_135	N	Y	21	32	58	0	0	0	111	0	7	102	1	1
Cl_cpe-2015_7540	ACUGGAAGUAUUCAGGGUCUA	21	SupFam_36	N	NA	34	32	46	0	1	1	114	18	87	6	3	0
Cl_cpe-2015_7584	CAUGUGCCCUCUUUCUCCAAU	21	SupFam_2	N	Y	41	47	71	7	1	6	173	34	113	25	1	0
Cl_cpe-2015_7657	UUCCUGUGUACUGUAUUUCUUC	22	SupFam_127	N	Y	23	34	27	1	0	2	87	2	0	84	1	0
Cl_cpe-2015_7706	UCAAGUUUAACAACUUCGGCUU	22	SupFam_712	N	NA	46	30	48	0	2	1	127	0	7	110	10	0
Cl_cpe-2015_7871	AGAUAUAAAUACUGAGUAUGA	21	SupFam_713	N	NA	22	24	51	0	0	0	97	3	76	13	5	0
Cl_cpe-2015_8072	AGGAUUUCCACUUCUCGAUU	20	SupFam_20	N	Y	41	17	90	0	0	0	148	99	36	13	0	0
Cl_cpe-2015_8400	ACAUCGAUGAGAUGAUUCGGC	21	SupFam_7	N	Y	27	20	52	0	0	0	99	5	92	2	0	0
Cl_cpe-2015_8496	GAUAAAGGAGACUAGGAAGUU	21	SupFam_339	N	Y	24	24	42	0	0	0	90	1	79	9	1	0
Cl_cpe-2015_8641	CAGUCCGACGAUCGGAGCUCG	21	SupFam_449	N	NA	68	153	51	12	10	16	310	70	129	75	36	0
Cl_cpe-2015_8654	GUUUAGUUUUGCUUGAAUGAA	21	SupFam_154	N	NA	29	29	33	0	0	1	92	2	88	1	1	0
Cl_cpe-2015_8894	CGUCCGGACAUCAGCAAAUAAUU	23	SupFam_126	N	N	57	34	159	0	0	0	250	0	0	23	141	86
Cl_cpe-2015_9144	UUUUCUUUGAAUCAAUUCAUG	21	SupFam_219	N	NA	20	22	41	0	4	1	88	4	81	3	0	0
Cl_cpe-2015_9150	GAAAACUGUUCACUUGGACA	20	SupFam_335	N	Y	28	32	40	0	0	1	101	69	0	32	0	0
Cl_cpe-2015_9190	UGGUGAGACUACAGAGAUAAAA	22	SupFam_326	ccm-MIR12493*	Y	22	43	47	0	0	1	113	6	28	71	6	2
Cl_cpe-2015_9254	UGAUGGAAUGAAGAUGCCGAGC	22	SupFam_67	N	Y	54	45	47	1	0	0	147	5	13	123	5	1
Cl_cpe-2015_9526	AGAUAUGGAAGAUUGACUAGGUCU	24	SupFam_118	N	N	45	27	34	3	0	4	113	0	0	3	21	89
Cl_cpe-2015_9622	UGACUGAGAAGUUGAGUGCUAAUU	24	SupFam_24	N	Y	43	37	157	0	0	0	237	0	0	0	65	172
Cl_cpe-2015_9840	CUUUGUCGCUAAGAUUCGAAA	21	SupFam_55	N	N	39	103	28	0	2	0	172	32	101	13	26	0
Cl_cpe-2015_9994	GACCCUGAGUACUUCCAAUUA	21	SupFam_10	N	NA	31	18	56	0	0	0	105	27	71	6	1	0
Cl_cpe-2015_10134	GGAUACCCCUUCUCUCUCGCA	21	SupFam_1285	N	NA	35	15	37	7	0	3	97	8	85	1	3	0
Cl_cpe-2015_10294	UCUAAAGCAUUCCAUUCUGCUC	22	SupFam_113	N	NA	62	39	60	0	3	2	166	6	79	80	1	0
Cl_cpe-2015_10726	UCUUGCUGAUGUUUGGGACG	20	SupFam_21	N	Y	15	26	46	1	1	0	89	84	4	1	0	0
Cl_cpe-2015_10780	GGAGAUUGUACAAAGAGAUACC	22	SupFam_71	N	Y	51	40	69	0	0	2	162	23	40	93	5	1
Cl_cpe-2015_11268	UCUUGGUUCGAAAUUUCCAUU	21	SupFam_714	N	NA	29	13	39	0	2	0	83	0	61	19	3	0
Cl_cpe-2015_12065	AAAGUGAUGCGGAAUCAGAUA	21	SupFam_715	N	NA	18	15	33	1	1	2	70	1	63	4	2	0
Cl_cpe-2015_12166	CCAAGAUCUUUUUAAUUUGAA	21	SupFam_1286	N	NA	11	27	29	0	2	4	73	9	54	10	0	0
Cl_cpe-2015_12764	UCUCAUUGACUGUCUCGCCUU	21	SupFam_716	N	NA	28	30	40	2	5	1	106	4	83	13	6	0
Cl_cpe-2015_12814	UCUCCAAACUCAUUUCAUCUGC	22	SupFam_717	N	NA	22	22	36	0	0	0	80	0	5	66	5	4
Cl_cpe-2015_13073	GGCAAUUCAUCCUUGACUUCU	21	SupFam_718	N	NA	23	16	24	1	1	3	68	3	64	1	0	0
Cl_cpe-2015_13191	CCUGUAUACAUAGCUUCUCCG	21	SupFam_343	ccm-MIR12467*	Y	29	23	76	0	0	0	128	55	64	3	6	0
Cl_cpe-2015_13285	GAGAUGGUGGAUGAAUCUACC	21	SupFam_54	ccm-MIR12476a*	Y	25	29	34	0	0	0	88	3	82	3	0	0
Cl_cpe-2015_13422	GUGCAAAUAUGGGAAAAAGAAU	22	SupFam_120	N	Y	15	9	29	1	0	0	54	0	4	48	2	0
Cl_cpe-2015_13680	GGCGACACCCAGAUUUGAACUGGA	24	SupFam_1287	N	NA	18	20	18	1	0	2	59	0	0	1	3	55
Cl_cpe-2015_13719	UCCCGCACCUGAACUUCCAAA	21	SupFam_192	N	Y	11	20	21	0	1	2	55	2	52	1	0	0
Cl_cpe-2015_14068	CCGGUUCCAUUCUCAUGACA	20	SupFam_61	N	Y	15	19	38	1	0	1	74	68	6	0	0	0
Cl_cpe-2015_14132	UUUGACAUGAUUUCUGGUCCU	21	SupFam_200	N	N	37	39	55	0	1	1	133	2	113	18	0	0
Cl_cpe-2015_14334	AUGGGAAAUGCUUGCUGGCAAU	22	SupFam_95	N	NA	15	16	22	2	1	0	56	0	5	47	3	1
Cl_cpe-2015_14337	GGUGCGGCUGGAUCACCUCCC	21	SupFam_1288	N	NA	85	55	36	4	5	7	192	82	96	13	1	0
Cl_cpe-2015_14506	UCUAUGAAUACAUGCAAAUG	20	SupFam_28	N	Y	26	16	72	0	0	0	114	54	54	6	0	0
Cl_cpe-2015_15012	CUCUGCAUCUUCAUUCCAUC	20	SupFam_25	N	Y	14	25	42	0	1	2	84	61	21	2	0	0
Cl_cpe-2015_16366	UGAAGCAUUCCAUUCUGCUAG	21	SupFam_113	N	NA	26	22	40	0	1	1	90	2	56	32	0	0
Cl_cpe-2015_16668	UGAAAUUCUUGGUGGCACCCCU	22	SupFam_26	N	Y	12	5	37	0	0	0	54	0	2	50	2	0
Cl_cpe-2015_16899	UAUUCGGGAGCAGCGUAGCCCAA	23	SupFam_124	N	N	18	9	46	0	0	0	73	0	2	12	50	9
Cl_cpe-2015_16954	UGAGAGAAAGCUGAUGCAGAU	21	SupFam_719	N	NA	9	19	22	0	0	0	50	1	43	4	2	0
Cl_cpe-2015_17304	AGCCGUGCAGCUCAAACAACU	21	SupFam_720	N	NA	17	9	27	0	0	0	53	0	49	4	0	0
Cl_cpe-2015_17353	UGGGAUAGUUGAGUUAUCUAU	21	SupFam_721	N	NA	8	19	23	0	0	1	51	1	49	1	0	0
Cl_cpe-2015_17582	CGUACUUAGUAUUUAUAUUUCU	22	SupFam_722	N	NA	25	23	38	1	1	0	88	0	37	44	0	7
Cl_cpe-2015_18376	ACUGUUAAGAAACUGAAACU	20	SupFam_723	N	NA	25	29	32	2	0	0	88	81	6	1	0	0
Cl_cpe-2015_18464	UAGAUGAAAUGAAUUUGGAGUAU	23	SupFam_337	N	N	30	41	42	3	2	5	123	0	6	18	55	44
Cl_cpe-2015_18645	UGGAAGUUCAGGUGUUGGUAC	21	SupFam_11	N	Y	15	16	27	0	1	0	59	2	48	9	0	0
Cl_cpe-2015_18684	GGGUUGUGGUCACGGGAAGAAA	22	SupFam_724	N	NA	22	13	14	0	0	0	49	1	7	40	1	0
Cl_cpe-2015_18894	AUUCUUACUAAUAUUAGGGACU	22	SupFam_129	N	Y	38	20	83	2	0	0	143	4	21	50	13	55
Cl_cpe-2015_19348	AGUAUCUCUGUGUACAAUCUUC	22	SupFam_134	N	Y	29	28	49	0	2	0	108	1	16	40	41	10
Cl_cpe-2015_19778	AGGAAACAUACUGUGGUCGCCA	22	SupFam_1289	N	NA	12	10	31	0	0	0	53	0	2	51	0	0
Cl_cpe-2015_19795	CAGUUCAAAUCUGGGUGUCGCCUC	24	SupFam_1290	N	NA	38	15	37	1	2	2	95	0	0	1	17	77
Cl_cpe-2015_19811	GAUUGCUGAAAAAGAAGAAUG	21	SupFam_125	N	Y	8	11	24	0	0	0	43	4	38	1	0	0
Cl_cpe-2015_20060	UACUCAGGGUCAAGAUACCCCAC	23	SupFam_295	N	Y	23	32	37	0	2	1	95	0	7	12	42	34
Cl_cpe-2015_20147	UGCAUAAAUUCGUAGACUAGA	21	SupFam_1	N	Y	13	14	49	1	1	5	83	25	50	7	1	0
Cl_cpe-2015_20610	AGUUGCCCCAAGAAUUUCAUAUU	23	SupFam_123	N	Y	10	12	47	3	0	0	72	0	0	8	49	15
Cl_cpe-2015_20666	GAAUAUGGUGAGCAAGAGAUU	21	SupFam_341	N	Y	24	29	53	2	0	0	108	2	84	20	2	0
Cl_cpe-2015_20790	CGUCCCUACGUCACCAAGUGAUUU	24	SupFam_74	N	Y	20	5	47	0	0	0	72	0	0	1	10	61
Cl_cpe-2015_21415	UCACAUCGUAGGUUGUCUUCUC	22	SupFam_136	N	N	7	17	21	1	0	0	46	0	4	42	0	0
Cl_cpe-2015_21473	UGAAUUGUCUCUGAAGCUGACU	22	SupFam_65	N	Y	31	23	37	0	1	3	95	8	32	53	1	1
Cl_cpe-2015_22629	GCGACCCCAGGUCAGGCGGA	20	SupFam_725	N	NA	36	33	23	0	1	1	94	70	22	2	0	0
Cl_cpe-2015_22961	CUUCCAAGUCUCCUUUGAUCGA	22	SupFam_726	N	NA	15	18	27	0	3	1	64	2	7	36	13	6
Cl_cpe-2015_23488	CUUACCUUUUAAUUUGAACCC	21	SupFam_191	N	N	22	12	34	1	0	2	71	5	66	0	0	0
Cl_cpe-2015_23580	CGCAAGUCUCCUUGGCUAUC	20	SupFam_333	N	Y	15	5	23	0	0	0	43	34	9	0	0	0
Cl_cpe-2015_24406	UCUUCAAAAUCGCUACAUCUCC	22	SupFam_328	ccm-MIR12481*	Y	16	21	24	0	0	0	61	6	9	45	1	0
Cl_cpe-2015_25084	UGCGAUUCCGACUUUUGCCUUUUU	24	SupFam_50	N	Y	53	16	81	0	0	0	150	0	0	14	36	100
Cl_cpe-2015_25528	UGUCUCUUUUACAAUGCAAU	20	SupFam_8	N	Y	26	26	71	0	3	2	128	73	50	5	0	0
Cl_cpe-2015_26552	UAGCAGCAAAUGUGACAGCAUA	22	SupFam_133	N	Y	18	19	31	1	3	0	72	2	5	51	14	0
Cl_cpe-2015_28242	UCACUUCUUUCCAUCCAUUC	20	SupFam_75	N	Y	17	14	30	0	0	0	61	37	24	0	0	0
Cl_cpe-2015_28746	UUUAUGAAGGUCUGUUUCCCC	21	SupFam_128	N	Y	11	10	47	0	0	2	70	21	39	10	0	0
Cl_cpe-2015_29181	CUCGCAUCCCGCAAUUGACGU	21	SupFam_1291	N	NA	5	11	21	0	0	0	37	3	33	1	0	0
Cl_cpe-2015_29275	UGUCUCUUUUACAAUGUUUU	20	SupFam_8	N	Y	44	17	33	0	0	0	94	38	32	24	0	0
Cl_cpe-2015_29309	GAUCCAGAAUACUUUCACAUUA	22	SupFam_10	N	NA	7	5	24	0	0	0	36	0	6	27	1	2
Cl_cpe-2015_29426	UUGCUGAUGUUUGGGACGAC	20	SupFam_21	N	Y	10	14	35	0	0	1	60	33	22	5	0	0
Cl_cpe-2015_30864	AAUGGAUGGAAAGAAGUGCGU	21	SupFam_17	N	Y	10	24	33	2	0	1	70	3	44	16	7	0
Cl_cpe-2015_32328	AAUUUGUUUGAGCUGCACGGC	21	SupFam_727	N	NA	18	28	28	2	1	0	77	1	44	32	0	0
Cl_cpe-2015_32496	GGUUAAUAUUCCCGAACUCA	20	SupFam_1292	N	NA	18	10	14	0	0	0	42	25	16	1	0	0
Cl_cpe-2015_32683	GCCGAAUUUGGAAUUCCUUGGC	22	SupFam_728	N	NA	12	15	10	0	0	0	37	0	2	35	0	0
Cl_cpe-2015_33031	ACUCUAGGUCAAGGUAUCCGAU	22	SupFam_256	N	NA	9	15	19	0	0	0	43	1	5	27	4	6
Cl_cpe-2015_33467	GCGGAUAUAGUCGAAUGGCU	20	SupFam_132	N	N	30	39	14	4	0	0	87	83	3	1	0	0
Cl_cpe-2015_35045	AGAGCUUUCUUCGGUCCACA	20	SupFam_415	N	NA	19	13	14	0	0	0	46	34	12	0	0	0
Cl_cpe-2015_35796	AGGUAACUCAACUAUCCCAUC	21	SupFam_729	N	NA	3	12	14	0	0	0	29	1	25	2	1	0
Cl_cpe-2015_36853	CUGUUGAAGUAUUAGGCAGCU	21	SupFam_730	N	NA	2	8	21	0	0	0	31	0	30	1	0	0
Cl_cpe-2015_36856	GAAUAAAGAAAGGCGACUUGU	21	SupFam_16	N	Y	13	16	21	0	0	1	51	3	29	18	1	0
Cl_cpe-2015_37787	CGCCACUUCUUCGUCACUCUCUU	23	SupFam_73	N	Y	27	15	62	0	0	0	104	0	0	38	41	25
Cl_cpe-2015_38911	UCUCGAAGUUAAGGUGCUGGUA	22	SupFam_11	N	Y	2	12	10	0	0	0	24	0	3	20	1	0
Cl_cpe-2015_39029	UAAGUCGUUCAUGUGCAUCCCU	22	SupFam_39	N	Y	12	8	19	0	0	1	40	0	5	35	0	0
Cl_cpe-2015_39537	AGUGUCUCUUUUACAAUGCAA	21	SupFam_8	N	Y	18	13	19	0	0	0	50	6	25	17	2	0
Cl_cpe-2015_39996	GGACCGACGCGGAUUACGGUGGU	23	SupFam_469	N	N	15	57	20	0	0	0	92	0	1	33	35	23
Cl_cpe-2015_42714	UGGAGAAGCAGGGCACGUUUU	21	SupFam_187	N	NA	22	22	23	2	2	3	74	15	35	16	8	0
Cl_cpe-2015_42830	AGAAGCCACUAAGAACUUUU	20	SupFam_255	N	NA	7	6	15	0	0	0	28	23	5	0	0	0
Cl_cpe-2015_43470	AGGUGCUCAAGGUUCAGAAUA	21	SupFam_258	N	NA	6	10	10	0	0	0	26	3	21	0	2	0
Cl_cpe-2015_45087	CACUCUGGAUCUAAGUAACU	20	SupFam_257	N	NA	15	18	33	2	0	2	70	49	18	3	0	0
Cl_cpe-2015_45268	AGGAAUUGCCACCAUCCUUUUC	22	SupFam_332	ccm-MIR12484*	Y	7	11	13	0	0	0	31	3	2	24	2	0
Cl_cpe-2015_45438	CGAUCGAGGAGAUGAUGCGCCUUU	24	SupFam_7	N	Y	7	1	17	0	0	0	25	0	0	0	2	23
Cl_cpe-2015_46118	CCGGAGGUAGGGUCCAGCGGCC	22	SupFam_1293	N	NA	17	19	18	1	0	0	55	0	14	39	2	0
Cl_cpe-2015_47267	CGAACCUUUCCGCUUUAAUU	20	SupFam_731	N	NA	12	9	21	0	0	0	42	31	6	5	0	0
Cl_cpe-2015_48464	CGACUCUCGGCAACGGAUAUU	21	SupFam_1294	N	NA	28	38	8	0	0	0	74	2	30	41	1	0
Cl_cpe-2015_49338	CCAGUUCCGAACCCGUCGGA	20	SupFam_1295	N	NA	12	17	9	0	0	0	38	33	1	4	0	0
Cl_cpe-2015_52202	UUCAUGUGCCCUGUUUCUCC	20	SupFam_2	N	Y	17	8	16	1	0	0	42	27	15	0	0	0
Cl_cpe-2015_52694	GGGUAUGCUGCCCAGAAUAAU	21	SupFam_1296	N	NA	6	4	17	0	0	0	27	1	19	7	0	0
Cl_cpe-2017_2	UGGCAGAAGUAGGAAUCGCAGU	22	SupFam_6	N	Y	19346	18057	27005	547	376	284	65615	124	275	64541	569	106
Cl_cpe-2017_4	CCGGUUCCAUUCUCAUGACGGU	22	SupFam_61	ccm-MIR12492*	Y	16206	21714	26153	78	151	45	64347	364	11898	51699	375	11
Cl_cpe-2017_9	UUUGCAUAAAUUCGUAGACUAG	22	SupFam_1	ccm-MIR12463b	Y	8809	10242	12977	1133	1105	804	35070	645	3990	30132	288	15
Cl_cpe-2017_10	CAGCUUGAAAUGUAGUAUCCU	21	SupFam_52	ccm-MIR12469a	Y	11392	18446	33773	137	149	138	64035	7480	33610	20191	2754	0
Cl_cpe-2017_11	UGUACCAUGAUUUGCAGACGAG	22	SupFam_27	N	Y	7410	13191	13473	190	262	139	34665	673	916	29055	3945	76
Cl_cpe-2017_15	CACGAAUAAAGAAAGGCGACUU	22	SupFam_16	N	Y	5663	15136	10359	410	553	544	32665	816	10872	20663	290	24
Cl_cpe-2017_17	AGGAAACAUAUUGUGGCUCGGC	22	SupFam_15	ccm-MIR12487	Y	3771	7709	9397	59	111	73	21120	42	482	19208	1226	162
Cl_cpe-2017_18	UGCGAUUCCGACUUUUGCCUUA	22	SupFam_50	N	Y	3858	7147	12025	3	7	2	23042	144	2907	15656	3396	939
Cl_cpe-2017_20	CGUUUGCAAAUCAUGGUACAGC	22	SupFam_117	ccm-MIR12497a	Y	3372	7961	5445	220	286	362	17646	44	397	17129	59	17
Cl_cpe-2017_21	UGUCCCGGUGAACAGUUUUCUU	22	SupFam_62	ccm-MIR12479	Y	3854	5543	5860	387	348	235	16227	113	1178	14833	95	8
Cl_cpe-2017_22	CGAUCGAGGAGAUGAUGCGCC	21	SupFam_7	N	Y	4309	8394	11252	77	77	83	24192	163	22379	1564	86	0
Cl_cpe-2017_23	CAGCUCGAAUCGUAGUAACCGA	22	SupFam_260	ccm-MIR12469b	Y	3036	4374	7727	200	189	190	15716	133	2338	13068	142	35
Cl_cpe-2017_27	GAGCAAAUAUGUGAAGAAGAAU	22	SupFam_120	ccm-MIR12491*	Y	2041	5227	5013	14	29	26	12350	168	148	11837	74	123
Cl_cpe-2017_28	AGGAUGGAUGGACUUUGUGAG	21	SupFam_64	N	Y	2275	5140	4644	49	61	82	12251	87	11816	338	10	0
Cl_cpe-2017_30	UGUAUCUCUGUUAUUAAAGCUU	22	SupFam_63	N	Y	2162	6620	4650	172	189	179	13972	116	871	12233	651	101
Cl_cpe-2017_36	UGCGAUUCCUGCUUCAGCCAUG	22	SupFam_50	N	Y	2177	3923	4804	13	14	16	10947	42	258	10488	140	19
Cl_cpe-2017_38	GUGAAACUUGGGGGUCUCGUG	21	SupFam_119	ccm-MIR12489*	Y	2067	4523	5182	3	8	8	11791	1269	10010	471	41	0
Cl_cpe-2017_39	CGAGAUCUCUAAUAGAAGCUU	21	SupFam_447	N	NA	1805	3735	4909	46	43	64	10602	378	9889	276	59	0
Cl_cpe-2017_40	UAAGUCGUUCAUGUGCUUCGC	21	SupFam_39	N	Y	3269	3168	4707	218	150	152	11664	56	11419	177	12	0
Cl_cpe-2017_42	UUGGACUCUAGUUCUACGCUGC	22	SupFam_149	N	NA	2747	3616	4188	213	213	296	11273	50	192	10824	142	65
Cl_cpe-2017_43	CGUCAUUGGAAUGGGAUUGGAU	22	SupFam_262	ccm-MIR12492	Y	2068	3695	4098	242	160	190	10453	298	729	8975	429	22
Cl_cpe-2017_45	GAGAGGUGGUUGGCGAUUCUAC	22	SupFam_54	N	Y	2255	3042	3504	376	199	224	9600	235	489	8540	330	6
Cl_cpe-2017_46	UGCAAAUCAUGCCUUUGCCGUG	22	SupFam_680	N	NA	1275	4139	3826	5	4	4	9253	8	175	9002	62	6
Cl_cpe-2017_47	UGAACGGGGAAGAAGACAGAUG	22	SupFam_269	N	Y	1720	2857	3980	18	14	21	8610	41	286	8211	67	5
Cl_cpe-2017_49	CGAGACCCCUGAGUUUCCUCU	21	SupFam_121	N	Y	3818	5005	7795	86	89	61	16854	662	9212	5159	1821	0
Cl_cpe-2017_50	UAACUAGGAGCUCUGCUGCAUU	22	SupFam_679	N	NA	1730	3190	3067	399	571	430	9387	55	570	8568	179	15
Cl_cpe-2017_53	UUAUCUUUGUAGUCUUGCCAAG	22	SupFam_266	ccm-MIR12493	Y	1679	2998	2935	164	162	197	8135	341	396	7260	128	10
Cl_cpe-2017_58	GUCGUCAUUCUUUAUUCGUGGU	22	SupFam_51	N	Y	1890	5580	3720	11	35	11	11247	104	1424	9647	67	5
Cl_cpe-2017_60	AAGUGGUGGAAAAGUUCGAGU	21	SupFam_263	N	Y	1762	2426	2392	257	304	304	7445	134	7279	31	1	0
Cl_cpe-2017_62	GAGUGACGAGAAAGUGGCGUA	21	SupFam_12	ccm-MIR12466*	Y	2396	3916	5506	21	47	5	11891	1214	7635	2895	147	0
Cl_cpe-2017_64	UGGAAAUCAAUUAUGUGGAUU	21	SupFam_289	N	Y	966	2654	2198	45	70	100	6033	98	5877	54	4	0
Cl_cpe-2017_67	GCUCAGGGGCCGAGAUGCAUG	21	SupFam_261	ccm-MIR12496*	Y	1318	2009	2624	7	22	6	5986	172	5676	103	35	0
Cl_cpe-2017_68	UGAAAUUCUUGGUGGCAGUCUU	22	SupFam_26	N	Y	868	2818	2580	28	37	48	6379	71	333	5516	399	60
Cl_cpe-2017_70	AGAAGCCACUAAGAACUUCACA	22	SupFam_255	N	NA	1139	2589	2072	14	26	34	5874	30	847	4956	19	22
Cl_cpe-2017_72	UCCAUAUGUAUUGAGCUGUCUC	22	SupFam_116	ccm-MIR12494b	Y	1458	2034	2285	231	153	124	6285	144	503	5570	39	29
Cl_cpe-2017_73	CCUGUACGGAGGGAGGACAAC	21	SupFam_40	N	Y	1765	2381	2981	44	34	50	7255	158	6932	137	28	0
Cl_cpe-2017_74	UCUUGGUGAUGUUUGGGACGAC	22	SupFam_21	ccm-MIR12465b	Y	1611	2468	3158	67	66	90	7460	172	145	6754	366	23
Cl_cpe-2017_75	AUAUGGAAGAUUGACUAGGUCC	22	SupFam_118	ccm-MIR12483	N	1788	2890	3476	177	109	175	8615	28	502	7137	883	65
Cl_cpe-2017_81	UGAAUUGUCCGUGAAGCUGAC	21	SupFam_65	N	Y	1002	1906	2096	56	49	63	5172	113	4716	336	7	0
Cl_cpe-2017_83	UUUGGAAGUUCAGGUGUUGGUA	22	SupFam_11	ccm-MIR12486*	Y	917	2064	2257	14	16	10	5278	20	1019	4135	79	25
Cl_cpe-2017_88	AGCGCUGUGGCAGCUAUCUUCU	22	SupFam_276	N	Y	916	2134	1825	26	47	25	4973	45	205	4693	27	3
Cl_cpe-2017_89	UGUCUUCUCCUCCGUACAGGGA	22	SupFam_5	N	Y	709	1411	1614	39	29	45	3847	5	90	3713	23	16
Cl_cpe-2017_94	AGCGGGGAACUAGAGUCCAAGU	22	SupFam_681	N	NA	962	1907	1322	5	9	10	4215	12	94	4051	44	14
Cl_cpe-2017_95	UGAGGAAUUAUGGAAAGAAGGG	22	SupFam_265	N	Y	1074	1381	1937	8	4	3	4407	92	437	3812	61	5
Cl_cpe-2017_99	UCUGUCCUCUUCGCCGUUCAUC	22	SupFam_272	N	Y	692	1295	1638	63	44	94	3826	19	188	3556	51	12
Cl_cpe-2017_104	UGAUGGAAUGAAGAUGCGGAGUA	23	SupFam_67	N	Y	1588	2520	2659	41	58	19	6885	0	86	2101	4597	101
Cl_cpe-2017_105	CACAAAGUCUAUCCAUCCUUU	21	SupFam_270	N	Y	602	1446	1483	33	41	65	3670	175	3471	21	3	0
Cl_cpe-2017_107	UUCAUGAGUGGAAGAAAUUAUG	22	SupFam_290	N	N	577	1418	1355	26	20	34	3430	18	94	3281	35	2
Cl_cpe-2017_113	CGAGUGACAAUAUGUUUUCCGU	22	SupFam_9	ccm-MIR12487*	Y	639	2053	1437	27	47	48	4251	36	69	3485	645	16
Cl_cpe-2017_115	UGAAUGGAUGGAAAGAAGUGCG	22	SupFam_17	ccm-MIR12474b	Y	1461	2187	2672	47	40	52	6459	148	2559	3631	101	20
Cl_cpe-2017_117	AGAAGUGGAAAUCCUUGAGU	20	SupFam_274	N	Y	1079	1445	1719	27	20	12	4302	3145	1137	20	0	0
Cl_cpe-2017_120	CAAUGAGGGUUUGAAGGUUCC	21	SupFam_131	N	Y	801	1589	1332	89	77	85	3973	100	3817	55	1	0
Cl_cpe-2017_122	UCAGUUUCUCCCUCUUUGACCCUC	24	SupFam_277	N	Y	651	1322	1460	5	20	22	3480	0	0	12	175	3293
Cl_cpe-2017_123	AGUGGAUGGCAAGAAGUGAGC	21	SupFam_17	ccm-MIR12474a	Y	623	1207	1563	4	2	2	3401	38	3318	38	7	0
Cl_cpe-2017_126	UGACUGAGAAGUUGAGUGCUA	21	SupFam_24	ccm-MIR12473	Y	987	1933	2081	33	49	56	5139	843	3295	856	145	0
Cl_cpe-2017_128	GUAAAGGACAAUACAAGUGCU	21	SupFam_279	ccm-MIR12470	Y	568	1549	1165	12	21	2	3317	92	3210	13	2	0
Cl_cpe-2017_129	UGACCUGAGAAUACUUGGCCC	21	SupFam_264	N	N	1554	2480	1246	100	109	66	5555	624	4853	71	7	0
Cl_cpe-2017_138	AGCUGCCCCAAGAAUUUCAUA	21	SupFam_123	N	Y	684	1474	2139	9	29	19	4354	304	3948	57	45	0
Cl_cpe-2017_139	GAUGAGAAAGAAAUGAUGAUA	21	SupFam_683	N	NA	456	972	1178	2	0	1	2609	258	2335	14	2	0
Cl_cpe-2017_142	GGUUAUUACGAUUCGAGCAUGU	22	SupFam_682	N	NA	952	1990	2133	26	46	19	5166	282	616	2646	1572	50
Cl_cpe-2017_145	CGAACGAGUCGUAGUAUCCUA	21	SupFam_18	N	Y	596	948	1352	35	32	17	2980	587	2212	91	90	0
Cl_cpe-2017_146	UCUGUGCGGAGGAGAGGACGGC	22	SupFam_278	N	Y	610	1551	1008	34	28	11	3242	14	499	2649	80	0
Cl_cpe-2017_148	CAUGUGCCCUGUUUCUCCACC	21	SupFam_2	ccm-MIR164	Y	830	1569	1205	115	353	98	4170	320	3820	27	3	0
Cl_cpe-2017_149	UAGAGCGGAAAGGAUCGUCCAC	22	SupFam_275	ccm-MIR12488	Y	669	996	938	52	51	41	2747	97	85	2463	90	12
Cl_cpe-2017_155	AAAUGAUGGUGGGAAUUCCUUU	22	SupFam_325	N	Y	594	981	1206	37	50	43	2911	33	610	2226	41	1
Cl_cpe-2017_164	UGAGACUGAAGAAGAUUGCCCCC	23	SupFam_267	N	Y	1240	1350	2135	52	29	21	4827	0	20	1025	3325	457
Cl_cpe-2017_166	GGAUAUUACGACACAUUCACA	21	SupFam_60	N	Y	389	1113	922	88	133	119	2764	356	2335	41	32	0
Cl_cpe-2017_168	GUUGCUACAUUUCAAGCUGGC	21	SupFam_299	ccm-MIR12469a*	Y	371	983	1211	4	4	10	2583	23	2443	102	15	0
Cl_cpe-2017_172	GAUGUUGAGAUUGAAGUGGUG	21	SupFam_19	ccm-MIR12464	Y	586	1282	1400	38	27	25	3358	95	3239	23	1	0
Cl_cpe-2017_176	GUGUAUCUCUGUUAUUAAAGC	21	SupFam_63	N	Y	487	758	708	125	79	104	2261	54	2091	112	4	0
Cl_cpe-2017_179	UGGCAAAAGUACAAAUCGCAAU	22	SupFam_6	N	Y	398	732	1176	4	7	0	2317	20	44	1922	295	36
Cl_cpe-2017_181	UGUCCUCUCCUCCGUAUAGGUA	22	SupFam_5	ccm-MIR12480	Y	360	887	821	17	11	14	2110	27	276	1766	25	16
Cl_cpe-2017_183	UAUUCUGGUGCAGCGUAACCCUG	23	SupFam_124	N	N	611	798	1355	28	36	55	2883	0	30	594	1938	321
Cl_cpe-2017_186	CUCUGCAUCUUCAUUCCAUCUUA	23	SupFam_25	N	Y	652	1209	1433	34	27	34	3389	0	74	712	2260	343
Cl_cpe-2017_187	CCCGCACCUGAACUUCCAAAGA	22	SupFam_192	ccm-MIR12486	Y	322	614	887	0	0	1	1824	16	93	1673	20	22
Cl_cpe-2017_188	UGUCUCUUUUACAAUGCAACGA	22	SupFam_8	N	Y	626	1537	1318	57	53	87	3678	292	942	2127	281	36
Cl_cpe-2017_194	UCUGCAUGUAUUCAUAAACAA	21	SupFam_1	ccm-MIR12463a*	Y	479	859	911	30	46	38	2363	403	1648	221	91	0
Cl_cpe-2017_195	CGGAUCAUCUCCUCGAUCGUA	21	SupFam_53	N	Y	279	760	894	0	0	0	1933	229	1609	49	46	0
Cl_cpe-2017_199	GGAUAUGUGUUUCAGAAGAAUA	22	SupFam_303	N	N	173	902	730	2	7	0	1814	13	220	1576	2	3
Cl_cpe-2017_205	UGCUGUCAUAUUUGCUACUGGG	22	SupFam_66	N	Y	671	506	997	5	3	3	2185	68	238	1760	104	15
Cl_cpe-2017_206	UCUUCUUCCCAUAUUUGCUCUA	22	SupFam_3	ccm-MIR12491	Y	563	1303	1228	51	80	58	3283	122	1534	1573	17	37
Cl_cpe-2017_208	GGAUACUAUGACUUGUUCAU	20	SupFam_60	N	Y	262	822	1235	0	1	2	2322	1663	556	103	0	0
Cl_cpe-2017_210	UCCUAUCCUUUGCAUCAUCGU	21	SupFam_684	N	NA	348	750	676	30	28	59	1891	21	1711	156	3	0
Cl_cpe-2017_215	UCGAGCUUUUCCACUACUUCU	21	SupFam_194	N	Y	276	705	672	53	37	55	1798	37	1741	19	1	0
Cl_cpe-2017_227	GCGAUGCGAUCCCUAUGGACG	21	SupFam_13	N	Y	220	1125	444	20	12	69	1890	35	1676	168	11	0
Cl_cpe-2017_228	CACGUGCCAUGUUUCUCCAUC	21	SupFam_2	N	Y	603	1003	902	55	104	36	2703	882	1805	12	4	0
Cl_cpe-2017_230	CGAAUCAUCUCUUCCAUCGGG	21	SupFam_53	N	Y	304	558	635	22	9	13	1541	16	1503	19	3	0
Cl_cpe-2017_232	UGCAUCUCCGCCUCCUGAGCAC	22	SupFam_282	ccm-MIR12496	Y	435	591	861	16	12	5	1920	74	96	1630	100	20
Cl_cpe-2017_233	UACCUCUGUCAUCAGGGUCACC	22	SupFam_439	N	NA	375	754	760	18	14	47	1968	4	7	1863	84	10
Cl_cpe-2017_235	UUGCUAGAAUAUGAAGAGGUU	21	SupFam_273	ccm-MIR12475	Y	334	524	665	11	17	13	1564	32	1459	65	8	0
Cl_cpe-2017_240	UACUCUAGGUCAAGGUAUCCG	21	SupFam_256	N	NA	329	539	681	34	42	41	1666	32	1602	30	2	0
Cl_cpe-2017_250	UGCGGUCACAUUUGCUACUAGA	22	SupFam_66	N	Y	368	393	528	17	22	17	1345	6	70	1226	23	20
Cl_cpe-2017_253	CCCGGACACUUUGCAAGGAAA	21	SupFam_70	ccm-MIR12477	Y	284	460	647	1	3	2	1397	158	1185	36	18	0
Cl_cpe-2017_260	UCUCUGUGUACUGUAUUUCUU	21	SupFam_127	N	Y	318	595	663	49	50	33	1708	270	1274	153	11	0
Cl_cpe-2017_266	CGAUGGAGGAGAUGAUACGCU	21	SupFam_7	N	Y	284	736	595	22	20	20	1677	47	1605	25	0	0
Cl_cpe-2017_269	CUACUUCAAUCUCAACAUCUU	21	SupFam_287	ccm-MIR12464*	Y	281	678	538	60	74	35	1666	47	1260	346	13	0
Cl_cpe-2017_273	UAAAAAGAUAUUAGCUCUUCUU	22	SupFam_309	N	N	171	604	496	17	11	30	1329	10	21	1246	52	0
Cl_cpe-2017_285	GGAUGGAAAGCUUUACGUGAUU	22	SupFam_311	N	Y	251	1198	465	2	7	2	1925	33	521	1209	64	98
Cl_cpe-2017_287	CAGCUUCACGGACAAUUCACC	21	SupFam_271	N	Y	374	730	498	1	6	3	1612	118	1447	46	1	0
Cl_cpe-2017_290	UUCUUCUGAAACACAGAUCCAU	22	SupFam_302	N	N	255	571	494	8	9	23	1360	24	34	1207	82	13
Cl_cpe-2017_293	AAAAUACAGUACAUAGAGAGC	21	SupFam_296	ccm-MIR12478	Y	290	509	531	15	7	7	1359	17	1320	16	6	0
Cl_cpe-2017_294	GGAAUCACCAACCAUCUCUCUU	22	SupFam_306	ccm-MIR12476b*	Y	170	571	498	26	12	27	1304	22	99	1166	16	1
Cl_cpe-2017_305	UCACGUAAAGCUUUCCAUCCAU	22	SupFam_281	N	Y	261	608	553	31	28	26	1507	55	198	1112	129	13
Cl_cpe-2017_307	CACUUGUAUUGUCUUUUGCUU	21	SupFam_288	ccm-MIR12470*	Y	201	542	397	18	20	17	1195	46	1125	23	1	0
Cl_cpe-2017_315	UUCAGUUUCUUAACAGCAAUU	21	SupFam_320	N	Y	176	608	452	12	8	32	1288	211	1056	19	2	0
Cl_cpe-2017_318	UAUGAAGGUCUGUUUCCCCAU	21	SupFam_128	N	Y	497	992	597	33	39	13	2171	36	1384	704	47	0
Cl_cpe-2017_327	GUCUAUGAAUACAUGCAGAUA	21	SupFam_28	ccm-MIR12463a	Y	262	1020	803	9	12	4	2110	363	1731	13	3	0
Cl_cpe-2017_328	UGAAUGUGUCAUAAUAUCCUA	21	SupFam_18	N	Y	99	573	477	8	15	26	1198	203	944	29	22	0
Cl_cpe-2017_333	CUGUGUAGGUAAUUUAACCCUC	22	SupFam_49	ccm-MIR12485	Y	150	692	453	4	8	14	1321	7	200	1070	40	4
Cl_cpe-2017_347	UGUGGUGAAGCCGAUGAUGAGA	22	SupFam_292	N	Y	241	578	449	5	5	5	1283	22	370	880	3	8
Cl_cpe-2017_348	UGAACAUGUCAUAGUAUCCCA	21	SupFam_18	N	Y	202	505	443	8	10	9	1177	163	953	25	36	0
Cl_cpe-2017_359	GACAACUCUAUACAUAUGGACA	22	SupFam_268	N	Y	225	553	337	6	8	5	1134	5	235	872	5	17
Cl_cpe-2017_365	CGUCCCUACGUCACCAAGUGA	21	SupFam_74	ccm-MIR12465b*	Y	328	703	967	3	3	4	2008	714	865	220	209	0
Cl_cpe-2017_367	GAGAUUGCUGAAAAAGAAGAA	21	SupFam_125	ccm-MIR12468	Y	234	441	346	4	11	1	1037	158	845	27	7	0
Cl_cpe-2017_382	CUUCUUUCCGUACUUCCUCCGU	22	SupFam_3	N	Y	176	466	448	14	14	26	1144	27	124	913	70	10
Cl_cpe-2017_384	GUGAACAUCAUCCACUACACG	21	SupFam_114	N	Y	217	344	330	25	12	24	952	4	930	14	4	0
Cl_cpe-2017_386	AGUUUAUGAAUUUAUGCAAAUA	22	SupFam_28	ccm-MIR12463b*	Y	158	493	364	8	9	7	1039	21	173	813	19	13
Cl_cpe-2017_388	GUCGCCAUUCUUUAUUCGUGA	21	SupFam_51	N	Y	182	528	407	1	6	4	1128	159	864	92	13	0
Cl_cpe-2017_390	AAUGAAAGAACACCACAACGUU	22	SupFam_69	N	Y	228	418	416	25	23	7	1117	11	174	922	7	3
Cl_cpe-2017_392	UCUUACUAAUAUUAGGGACUC	21	SupFam_129	N	Y	274	803	547	15	26	37	1702	60	1542	87	13	0
Cl_cpe-2017_393	CGCCACUUCUUCGUCACUCUCU	22	SupFam_73	N	Y	442	1069	1201	18	24	32	2786	66	1535	1075	79	31
Cl_cpe-2017_410	CGUCCGGACAUCAGCAAAUA	20	SupFam_126	N	N	246	378	711	0	2	1	1338	1052	128	158	0	0
Cl_cpe-2017_418	UUAGGACAAACAUUUGAGAGAC	22	SupFam_35	ccm-MIR12482	Y	246	419	349	26	23	23	1086	17	175	865	24	5
Cl_cpe-2017_425	GGAUAUCUUGACCUAGAGUAGC	22	SupFam_685	N	NA	283	813	448	1	6	1	1552	10	541	960	31	10
Cl_cpe-2017_426	GGGCAUGGGGGAAAAACUGAAA	22	SupFam_284	N	Y	189	366	289	3	0	2	849	36	70	728	13	2
Cl_cpe-2017_434	UCAUCAUCGGCUUCACCACAGA	22	SupFam_297	N	Y	164	336	312	15	19	20	866	11	122	728	0	5
Cl_cpe-2017_445	UCAAGGAUUUCCACUUCUCG	20	SupFam_20	N	Y	278	493	563	15	13	15	1377	889	230	258	0	0
Cl_cpe-2017_465	UGAAGGCAGCCAGAUGAGCAU	21	SupFam_280	N	Y	210	411	370	12	20	7	1030	38	980	9	3	0
Cl_cpe-2017_466	CAGCUUGAAAUGUAGUAUCCUUUU	24	SupFam_52	N	Y	345	402	851	0	0	1	1599	0	0	53	105	1441
Cl_cpe-2017_472	CAGCAGCAAAUUUGACAGCAUG	22	SupFam_133	N	Y	164	559	447	7	12	21	1210	31	112	1036	28	3
Cl_cpe-2017_484	GCCUGGUUGUUAAACUUGAAU	21	SupFam_686	N	NA	214	417	295	1	6	3	936	39	790	87	20	0
Cl_cpe-2017_486	ACCAUGAUUUGCAGACGAGU	20	SupFam_27	N	Y	220	316	457	6	9	0	1008	903	93	12	0	0
Cl_cpe-2017_499	AAGAUGGUUGCCACAGCACUCC	22	SupFam_300	N	Y	219	501	339	5	8	7	1079	11	73	982	13	0
Cl_cpe-2017_503	CACUCUGGAUCUAAGUAACCAA	22	SupFam_257	N	NA	434	633	676	39	41	24	1847	63	265	973	529	17
Cl_cpe-2017_504	UGAAAUUCCUGGUGGCAAGUUU	22	SupFam_26	N	Y	142	543	639	2	5	2	1333	32	211	736	245	109
Cl_cpe-2017_516	GAGAAAGUAUGGCAAAAAGUU	21	SupFam_22	N	Y	103	377	305	1	1	0	787	46	681	60	0	0
Cl_cpe-2017_519	AAGCCAAGGAUGAAUUGCCGU	21	SupFam_72	N	Y	181	447	390	8	17	13	1056	64	981	11	0	0
Cl_cpe-2017_576	UUACCUUUUAAUUUGAACCUU	21	SupFam_191	N	N	173	349	344	34	37	29	966	43	790	125	8	0
Cl_cpe-2017_600	GAGAGAUGGUGGAUGAAUCUAC	22	SupFam_54	N	Y	180	250	274	0	1	1	706	33	54	601	16	2
Cl_cpe-2017_605	GAUGAUGCAAAAGAUAGGAUU	21	SupFam_690	N	NA	177	421	322	3	8	9	940	42	623	264	11	0
Cl_cpe-2017_612	UGCUUAUGUUGUUAAACUUGGA	22	SupFam_308	N	N	154	256	188	0	2	0	600	5	28	536	28	3
Cl_cpe-2017_615	UGAACCUUCACUUUCUCAUCUC	22	SupFam_312	N	Y	115	312	235	10	9	21	702	4	36	641	5	16
Cl_cpe-2017_624	UAGUUUCACCCACCGUCUCUC	21	SupFam_135	ccm-MIR12476a	Y	101	242	282	9	9	12	655	16	614	24	1	0
Cl_cpe-2017_628	UUCACAUAAUUGAUUUCCGGC	21	SupFam_324	N	Y	105	327	271	1	2	1	707	4	657	46	0	0
Cl_cpe-2017_641	GGAUGAUCCUUUCUGCUCUCAU	22	SupFam_195	ccm-MIR12488*	Y	318	601	613	2	2	0	1536	100	289	602	495	50
Cl_cpe-2017_665	UCUGCAUGUAUUCGUACACCA	21	SupFam_1	N	Y	110	233	360	3	1	2	709	172	532	4	1	0
Cl_cpe-2017_681	CUUCUUUUUCAGCAGUCUCUC	21	SupFam_310	ccm-MIR12468*	Y	132	276	203	9	11	12	643	58	577	7	1	0
Cl_cpe-2017_695	UACUCAGGCGCGGCGUAGCCAUU	23	SupFam_190	N	Y	246	273	488	10	13	6	1036	0	25	418	538	55
Cl_cpe-2017_702	AAGCGUUGUUGGUGACUCGUU	21	SupFam_315	N	Y	232	402	836	2	1	2	1475	506	881	63	25	0
Cl_cpe-2017_757	UGGAUCAAUAGCUUCAAGCCAAU	23	SupFam_188	N	NA	216	474	531	5	8	9	1243	0	294	386	516	47
Cl_cpe-2017_759	GGGUUAAAUUGUCUACGCAGUG	22	SupFam_130	ccm-MIR12485*	Y	90	277	322	0	0	1	690	18	153	500	16	3
Cl_cpe-2017_768	UAAGUCACCUGCAACGUUUCC	21	SupFam_313	N	Y	125	197	358	0	3	2	685	44	595	39	7	0
Cl_cpe-2017_785	UCACGAAUAAAGAAAGGCGAC	21	SupFam_16	N	Y	127	206	182	18	14	18	565	56	483	26	0	0
Cl_cpe-2017_803	GGAGCACAUGAAAGACUUAUA	21	SupFam_93	N	Y	62	289	188	0	0	0	539	45	445	47	2	0
Cl_cpe-2017_806	UCCGUCCGGAAAUGUUCUUCC	21	SupFam_687	N	NA	129	229	267	15	19	11	670	6	634	25	5	0
Cl_cpe-2017_825	GGAGAUUGUACAAAGAGAUACU	22	SupFam_71	N	Y	292	601	535	5	11	6	1450	65	111	844	410	20
Cl_cpe-2017_832	UGAUCCUGAUGACAAGGGUAUG	22	SupFam_444	N	NA	70	272	161	0	1	2	506	10	25	462	8	1
Cl_cpe-2017_845	GUUAAGAGUGUCGUUUGUGGAU	22	SupFam_283	N	Y	102	266	167	2	4	1	542	12	22	485	11	12
Cl_cpe-2017_849	UUUUGAACCUUGAGUACCUUC	21	SupFam_688	N	NA	141	117	160	18	13	11	460	3	448	8	1	0
Cl_cpe-2017_874	GCUUCUGCCAGAGAUCUCGGG	21	SupFam_689	N	NA	107	188	249	0	1	0	545	31	471	39	4	0
Cl_cpe-2017_957	GGGCAAUCUUAGCAGUCUUGAC	22	SupFam_298	N	Y	124	281	361	0	1	0	767	12	210	475	64	6
Cl_cpe-2017_1027	UUGAAUGAGUGCUUGAAAGCC	21	SupFam_330	N	Y	99	232	199	16	9	18	573	2	568	3	0	0
Cl_cpe-2017_1046	UCCUAGCAAAGUGUCCUGGUA	21	SupFam_331	ccm-MIR12477*	Y	59	197	174	1	3	7	441	78	361	2	0	0
Cl_cpe-2017_1049	UCUUCAGGUGACCAUAAUCCAU	22	SupFam_693	N	NA	81	187	161	3	11	9	452	13	30	406	2	1
Cl_cpe-2017_1061	CUGCCUAAUACUUCAAUAGCCA	22	SupFam_342	N	Y	94	208	185	11	16	14	528	17	115	390	5	1
Cl_cpe-2017_1084	ACGAAUAAAGAAAGGUGACU	20	SupFam_16	N	Y	222	575	361	9	16	7	1190	508	624	58	0	0
Cl_cpe-2017_1111	AGUCCUCUCCUCCGUAUAGACA	22	SupFam_5	N	Y	48	195	112	11	15	20	401	1	32	348	19	1
Cl_cpe-2017_1113	CUAAAUGUAACAUGUUGUUCCC	22	SupFam_138	N	N	118	276	215	12	14	10	645	3	89	545	8	0
Cl_cpe-2017_1130	AGGACAGCAUUUGAGAGGAUU	21	SupFam_198	N	Y	76	158	177	0	1	0	412	27	361	20	4	0
Cl_cpe-2017_1144	CCUUAUUUCAAACCGGUACUC	21	SupFam_696	N	NA	127	197	289	0	0	0	613	76	385	131	21	0
Cl_cpe-2017_1149	CUUUUUGCCGUAUUUUCUCCG	21	SupFam_3	N	Y	83	190	161	9	9	12	464	22	396	44	2	0
Cl_cpe-2017_1168	CAUUUCUUCUAUCUGGUCAUGC	22	SupFam_327	N	Y	102	257	167	10	22	16	574	32	61	464	17	0
Cl_cpe-2017_1169	CGAGACCCCUGAGUUUCCUCUUUU	24	SupFam_121	N	Y	127	122	294	0	0	0	543	0	0	0	105	438
Cl_cpe-2017_1170	UCGACAUGUUUCAAGGCACGU	21	SupFam_691	N	NA	66	171	151	0	3	4	395	10	376	8	1	0
Cl_cpe-2017_1282	UCAAGGAUUUCCACUUCUCGAUU	23	SupFam_20	N	Y	158	138	214	8	15	2	535	0	21	124	357	33
Cl_cpe-2017_1300	CACUUCUUUCCAUCCAUUCAC	21	SupFam_75	N	Y	108	262	261	14	5	19	669	25	560	80	4	0
Cl_cpe-2017_1301	GAGUGAUGAGGAAGUGGCGU	20	SupFam_12	N	Y	97	232	278	2	7	2	618	325	183	110	0	0
Cl_cpe-2017_1325	AAGAAUAUUUCUGGACGGAGG	21	SupFam_286	N	N	86	128	148	11	7	7	387	5	350	27	5	0
Cl_cpe-2017_1337	AAGGUCAGAUAGAAGAAAUGGA	22	SupFam_294	N	Y	150	146	213	1	0	0	510	19	160	322	8	1
Cl_cpe-2017_1361	UAUCUCUGUGUACAAUCUUCCU	22	SupFam_134	N	Y	90	273	207	9	17	5	601	6	38	361	143	53
Cl_cpe-2017_1383	UACAUCUUUUUCCUACGAGCUU	22	SupFam_305	N	Y	68	161	119	7	7	5	367	6	19	331	8	3
Cl_cpe-2017_1421	GAAAACAUAUUGUUGCUCGAC	21	SupFam_15	N	Y	47	222	125	1	3	2	400	10	332	57	1	0
Cl_cpe-2017_1453	CGUCACCAGGGUGAACAGGUCC	22	SupFam_317	N	Y	92	201	158	9	12	9	481	21	27	426	6	1
Cl_cpe-2017_1490	CGGCAAAAGUAUGAUUUGCAAU	22	SupFam_6	N	Y	59	137	95	3	1	9	304	10	3	283	6	2
Cl_cpe-2017_1546	AGAUUGUACAAAGAGAUACUU	21	SupFam_71	N	Y	61	165	184	2	6	8	426	10	273	115	28	0
Cl_cpe-2017_1554	AAAAUGGUAAUCAUGAACCCA	21	SupFam_338	N	N	58	159	142	1	3	2	365	35	329	1	0	0
Cl_cpe-2017_1610	AGCAAUGCUAUCCUUUGGACG	21	SupFam_695	N	NA	56	127	112	3	4	16	318	6	295	14	3	0
Cl_cpe-2017_1614	UUGGAAAUCUAGAGCCAAGAAU	22	SupFam_692	N	NA	62	135	150	2	4	1	354	24	23	272	30	5
Cl_cpe-2017_1768	ACUUAGUCAAUCUUCCAUAACU	22	SupFam_321	ccm-MIR12483*	N	96	219	192	1	5	1	514	8	158	278	46	24
Cl_cpe-2017_1799	UGUAGUGGAUGUUGUUCAUCA	21	SupFam_697	N	NA	74	159	139	2	0	3	377	102	246	15	14	0
Cl_cpe-2017_1852	UAGCAUCUGUGCCUUCCAAAG	21	SupFam_314	N	Y	32	163	93	10	5	10	313	2	253	43	15	0
Cl_cpe-2017_1856	UGGCGUGAAGCCAUUGAUCCAUG	23	SupFam_38	N	NA	53	148	132	2	0	0	335	0	27	48	259	1
Cl_cpe-2017_1861	UGAAUCCUCUAAGUUUCUUCCU	22	SupFam_81	N	NA	40	144	120	6	8	15	333	8	34	282	8	1
Cl_cpe-2017_1875	UCAUCAUUGCUUUCUCAUCAA	21	SupFam_45	N	Y	47	131	145	2	1	2	328	75	235	17	1	0
Cl_cpe-2017_1877	UCUUUGAAUCAAUUCAUGCAU	21	SupFam_694	N	NA	33	148	91	4	2	8	286	7	252	23	4	0
Cl_cpe-2017_1884	CAGGAAGAAAGAAAAUGUGUG	21	SupFam_77	N	Y	63	101	128	1	0	2	295	29	251	14	1	0
Cl_cpe-2017_1914	GGACCUAAUAUUAGUAAGAGU	21	SupFam_140	N	Y	37	135	60	1	0	1	234	1	232	1	0	0
Cl_cpe-2017_1961	GGCGAGACAGUCAAUGAGAUA	21	SupFam_699	N	NA	48	111	107	0	1	0	267	27	225	15	0	0
Cl_cpe-2017_2027	GGGAAACUUGGAGGAUUCAAG	21	SupFam_307	N	Y	55	90	77	0	1	0	223	5	212	6	0	0
Cl_cpe-2017_2033	GCAGAUAUGGAUGUUUUAGAU	21	SupFam_76	N	Y	87	132	178	0	0	0	397	12	226	158	1	0
Cl_cpe-2017_2046	GCACUCAAUUUCUCAGUCAUC	21	SupFam_48	ccm-MIR12473*	Y	36	105	98	0	1	2	242	3	235	4	0	0
Cl_cpe-2017_2071	UUUGCAUAUAUUCAUAUACCA	21	SupFam_1	N	Y	32	116	137	0	1	0	286	54	226	2	4	0
Cl_cpe-2017_2075	UAGCCAAGGAUGAUUUGCCGUU	22	SupFam_72	N	Y	60	91	116	3	1	3	274	3	19	246	5	1
Cl_cpe-2017_2089	UUAUUUAGGACAAACAUUUGAG	22	SupFam_319	N	Y	78	144	108	19	18	22	389	25	102	220	18	24
Cl_cpe-2017_2142	CGUCUCUUUUACAAUGCAACAG	22	SupFam_8	N	Y	47	118	37	9	9	4	224	3	4	204	11	2
Cl_cpe-2017_2299	GGCUACGUUGCACUGAGUAUA	21	SupFam_122	ccm-MIR12495*	Y	67	74	104	3	3	0	251	34	204	4	9	0
Cl_cpe-2017_2395	GCUCGUCUGGCUGCUUUCACA	21	SupFam_293	N	Y	74	117	103	2	0	0	296	26	268	2	0	0
Cl_cpe-2017_2486	GCGCUCAACUUCUCAGUGACC	21	SupFam_48	N	Y	49	126	99	0	0	0	274	6	264	3	1	0
Cl_cpe-2017_2496	CCAAGGUCAUCCAAGUUUGUU	21	SupFam_304	N	Y	46	136	114	0	1	0	297	30	226	36	5	0
Cl_cpe-2017_2632	AUUUCUUGUUCAUCAUAUUCC	21	SupFam_137	N	Y	48	121	92	0	3	5	269	1	261	7	0	0
Cl_cpe-2017_2725	GGCAAUUCUUCCCUUGGUUUCU	22	SupFam_316	N	N	40	117	102	0	1	0	260	3	56	197	4	0
Cl_cpe-2017_2830	GAUGUUGAGAUCGAAGUAGU	20	SupFam_19	N	Y	62	146	205	0	0	0	413	192	208	13	0	0
Cl_cpe-2017_2989	GCCCCUAAUAUUAGUAAGAUU	21	SupFam_140	N	Y	60	179	150	0	0	0	389	153	234	0	2	0
Cl_cpe-2017_2993	UAGUUUCUUCCACUCAUGAAAA	22	SupFam_329	N	N	43	88	96	3	1	1	232	8	42	160	13	9
Cl_cpe-2017_3074	GCAGAAUGUAAUGCUUUAGAU	21	SupFam_76	N	Y	41	96	56	0	1	0	194	17	171	4	2	0
Cl_cpe-2017_3078	GGAGAAACUGACCUUCAUAUA	21	SupFam_169	N	NA	28	102	68	0	0	0	198	27	163	6	2	0
Cl_cpe-2017_3214	UAAAGGAUGGAUGGACUUUGUG	22	SupFam_64	N	Y	65	144	159	1	5	1	375	7	114	210	27	17
Cl_cpe-2017_3236	GCCAAGUAUUCUCACAGUCACU	22	SupFam_702	N	NA	55	156	39	0	0	0	250	4	64	181	1	0
Cl_cpe-2017_3252	UGUCUCUUUUACAAUGCAACGUUU	24	SupFam_8	N	Y	80	130	165	1	2	1	379	0	0	9	118	252
Cl_cpe-2017_3397	GGAUGAGAAACCUAGGAAGAC	21	SupFam_141	N	N	16	74	79	0	0	0	169	6	160	3	0	0
Cl_cpe-2017_3416	CAGGAGCUAUGUAUGCAGGGA	21	SupFam_301	ccm-MIR12467	Y	46	64	73	7	4	3	197	17	146	30	4	0
Cl_cpe-2017_3515	AUGUGAAAGCAUUCUGGAUCUA	22	SupFam_196	N	Y	57	98	97	2	0	1	255	15	81	153	4	2
Cl_cpe-2017_3567	UGCAGCAUAGCCCUAGUUAAU	21	SupFam_703	N	NA	29	75	50	7	1	2	164	6	148	9	1	0
Cl_cpe-2017_3636	CGCUUGUUAGAUCUUGCGUUCCUU	24	SupFam_704	N	NA	40	72	67	2	0	0	181	0	0	2	19	160
Cl_cpe-2017_3663	GUUGUAUUGUAAAAGAGACAAG	22	SupFam_698	N	NA	23	111	47	0	3	0	184	36	3	138	5	2
Cl_cpe-2017_3725	CUUCAUAGGUUUCUCAUCCAG	21	SupFam_45	N	Y	35	54	50	3	1	2	145	6	137	2	0	0
Cl_cpe-2017_3761	UGGAUCAAUAGCUUCAAGCC	20	SupFam_188	N	NA	64	107	111	3	3	7	295	242	52	1	0	0
Cl_cpe-2017_3824	CCAUACACGCCACUUUUAACAU	22	SupFam_318	N	Y	31	65	64	3	0	4	167	5	13	144	3	2
Cl_cpe-2017_3903	GUGCCAUGAAACAUGUCGAGC	21	SupFam_708	N	NA	34	71	51	0	0	0	156	4	151	1	0	0
Cl_cpe-2017_3977	CGCCAUUCUUUAUUCGUGACC	21	SupFam_51	N	Y	39	86	62	3	2	1	193	6	185	2	0	0
Cl_cpe-2017_3993	UCCAUAUGUAUUGAGCUGUUGG	22	SupFam_116	N	Y	28	84	55	4	1	1	173	7	6	146	0	14
Cl_cpe-2017_4007	UUACCGGUUUGAGAUAGGGUA	21	SupFam_706	N	NA	34	76	64	0	1	1	176	49	124	2	1	0
Cl_cpe-2017_4025	ACAUCGAUGAGAUGAUUCGGC	21	SupFam_7	N	Y	51	50	55	4	4	1	165	8	157	0	0	0
Cl_cpe-2017_4161	UAUGUAACAAUUUUGAAGAAU	21	SupFam_285	N	Y	42	77	93	4	7	4	227	1	135	91	0	0
Cl_cpe-2017_4231	GAUGAGAAAGUGAGGGUUCAAA	22	SupFam_334	N	Y	40	86	48	0	2	1	177	5	12	120	19	21
Cl_cpe-2017_4287	GCUUGAAGCUAUUGAUCCAUG	21	SupFam_38	N	NA	20	71	59	1	0	0	151	9	133	8	1	0
Cl_cpe-2017_4356	UACAUUUUCUUUCUUCUUGCU	21	SupFam_700	N	NA	29	103	42	5	5	5	189	4	175	10	0	0
Cl_cpe-2017_4564	UGACUGAGAAGUUGAGUGCUAAUU	24	SupFam_24	N	Y	57	103	141	0	1	1	303	0	0	0	92	211
Cl_cpe-2017_4616	GUGUCCCGGUGAACAGUUUUC	21	SupFam_62	N	Y	27	39	49	0	1	1	117	7	110	0	0	0
Cl_cpe-2017_4644	UGAUGGAAUGAAGAUGCCGAGC	22	SupFam_67	N	Y	64	66	83	6	10	1	230	5	22	199	4	0
Cl_cpe-2017_4777	AGUAGAAUGGAAUGCUUCAAA	21	SupFam_322	N	Y	39	62	39	0	1	0	141	22	104	11	4	0
Cl_cpe-2017_5087	GGACAAUCAUUUGAGAGAAUA	21	SupFam_35	N	Y	31	71	64	0	0	0	166	19	113	26	8	0
Cl_cpe-2017_5143	CGAGAGAGAAGGGGUAUCCGA	21	SupFam_323	N	N	32	49	34	3	2	4	124	17	103	1	3	0
Cl_cpe-2017_5187	CGUAGUGGUGUUCUUUCGUUUU	22	SupFam_199	N	Y	18	73	37	0	5	5	138	4	12	117	4	1
Cl_cpe-2017_5256	ACCGAUAGUGAAUGGUGGCUU	21	SupFam_340	N	Y	41	88	63	2	3	2	199	18	123	57	1	0
Cl_cpe-2017_5303	UUUAAUAACAAAGAUACAGCGU	22	SupFam_448	N	NA	43	139	113	2	8	14	319	40	126	142	10	1
Cl_cpe-2017_5400	AUGUGCCAUGGUUCUCCAUC	20	SupFam_2	N	Y	46	77	49	7	6	5	190	110	70	10	0	0
Cl_cpe-2017_5515	UCAAAUCUGGUUCUUGGCACCA	22	SupFam_139	N	N	65	69	272	13	7	2	428	145	61	127	93	2
Cl_cpe-2017_5671	UUUGCAUAAAUUCGUAGACC	20	SupFam_1	N	Y	32	39	54	4	0	0	129	125	3	1	0	0
Cl_cpe-2017_5851	UCUCUCAAAUGUCUGUCCUUA	21	SupFam_14	N	NA	15	57	35	1	1	4	113	17	92	2	2	0
Cl_cpe-2017_6013	GUGAAACUUGGGUGUCAUGC	20	SupFam_119	N	Y	25	49	36	0	3	0	113	100	4	9	0	0
Cl_cpe-2017_6102	AGGAUUUCCACUUCUCGAUU	20	SupFam_20	N	Y	31	42	75	0	0	0	148	106	25	17	0	0
Cl_cpe-2017_6228	GGAUAUUAUGACAUGUUCAUG	21	SupFam_60	N	Y	7	53	32	0	0	0	92	0	90	2	0	0
Cl_cpe-2017_6244	CAUUCAAGCAAAACUAAACCG	21	SupFam_167	N	NA	18	52	55	4	2	9	140	11	128	1	0	0
Cl_cpe-2017_6257	UCAAGUUUAACAACUUCGGCUU	22	SupFam_712	N	NA	8	65	47	0	0	2	122	0	4	100	8	10
Cl_cpe-2017_6434	AGAUAUAAAUACUGAGUAUGA	21	SupFam_713	N	NA	16	54	45	0	0	0	115	9	80	22	4	0
Cl_cpe-2017_6600	UUUUCUUUGAAUCAAUUCAUG	21	SupFam_219	N	NA	10	56	33	0	1	0	100	8	92	0	0	0
Cl_cpe-2017_6663	GGGCUCAUAGCUCAGUGGUAGAGU	24	SupFam_701	N	NA	17	46	49	0	0	2	114	0	0	0	2	112
Cl_cpe-2017_6722	GAAAACUGUUCACUUGGACA	20	SupFam_335	N	Y	38	58	23	1	4	0	124	85	1	38	0	0
Cl_cpe-2017_6740	CAAACUUGGGUUUCCUUGGCA	21	SupFam_1297	N	NA	21	51	51	2	4	6	135	53	80	1	1	0
Cl_cpe-2017_6868	CUUUGUCGCUAAGAUUCGAAA	21	SupFam_55	N	N	38	46	107	0	4	2	197	42	114	13	28	0
Cl_cpe-2017_7050	UGAGUGGAUGGCAAGAAGUGAG	22	SupFam_17	N	Y	20	31	49	0	2	2	104	2	3	93	5	1
Cl_cpe-2017_7211	AUCUCUCAAAUGUUUGUCCCG	21	SupFam_14	N	NA	18	64	56	0	0	2	140	6	107	25	2	0
Cl_cpe-2017_7303	CGUCCGGACAUCAGCAAAUAAUU	23	SupFam_126	N	N	50	84	151	0	0	0	285	0	0	11	161	113
Cl_cpe-2017_7561	UGGGAUAGUUGAGUUAUCUAU	21	SupFam_721	N	NA	18	27	38	0	0	1	84	0	76	7	1	0
Cl_cpe-2017_7604	AAAUGAAAGAACACCACAACG	21	SupFam_69	N	Y	44	48	104	1	1	3	201	78	121	2	0	0
Cl_cpe-2017_7786	UGCUCACUAUCUUCUGUCAUA	21	SupFam_705	N	NA	14	51	23	3	8	2	101	13	86	1	1	0
Cl_cpe-2017_7851	AGAGUGACGAGAAAGUGGCGC	21	SupFam_12	N	Y	42	59	74	3	4	0	182	22	121	35	4	0
Cl_cpe-2017_8084	AGUUUCACCCACCGUCUCUCCU	22	SupFam_135	N	Y	25	37	39	2	0	0	103	1	13	89	0	0
Cl_cpe-2017_8155	CUCUCAAAUGAUUGUCCUAAAU	22	SupFam_709	ccm-MIR12482*	NA	17	57	17	2	4	8	105	8	25	69	3	0
Cl_cpe-2017_8225	GCCUGUUUCCCCUAAUGACGCC	22	SupFam_336	N	Y	29	48	33	1	1	0	112	2	11	96	2	1
Cl_cpe-2017_8348	UCUUGGUUCGAAAUUUCCAUU	21	SupFam_714	N	NA	8	49	24	0	0	0	81	0	74	3	4	0
Cl_cpe-2017_8353	UCUUGCUGAUGUUUGGGACG	20	SupFam_21	N	Y	12	30	43	2	0	1	88	82	4	2	0	0
Cl_cpe-2017_8518	UCUAAAGCAUUCCAUUCUGCUC	22	SupFam_113	N	NA	28	49	63	2	4	0	146	12	65	67	2	0
Cl_cpe-2017_8606	AAGGAUGAAUUGCCGUGGUA	20	SupFam_732	N	NA	14	33	29	0	0	0	76	68	6	2	0	0
Cl_cpe-2017_8633	GUUUAGUUUUGCUUGAAUGAA	21	SupFam_154	N	NA	15	35	29	1	2	0	82	10	70	1	1	0
Cl_cpe-2017_8652	AGCCUUCAAACCCUUGUUGAA	21	SupFam_711	N	NA	23	37	37	1	1	1	100	27	70	3	0	0
Cl_cpe-2017_8689	UUCCUGUGUACUGUAUUUCUUC	22	SupFam_127	N	Y	17	22	26	2	3	2	72	2	0	70	0	0
Cl_cpe-2017_8694	UCUCAUUGACUGUCUCGCCUU	21	SupFam_716	N	NA	26	47	37	6	1	2	119	4	97	10	8	0
Cl_cpe-2017_9162	AGUUGCCCCAAGAAUUUCAUAUU	23	SupFam_123	N	Y	24	42	93	2	0	2	163	0	4	10	96	53
Cl_cpe-2017_9171	GUGCAAAUAUGGGAAAAAGAAU	22	SupFam_120	N	Y	14	26	31	0	0	0	71	2	4	65	0	0
Cl_cpe-2017_9449	ACUGGAAGUAUUCAGGGUCUA	21	SupFam_36	N	NA	12	39	33	0	0	0	84	17	65	1	1	0
Cl_cpe-2017_9548	AAAGUGAUGCGGAAUCAGAUA	21	SupFam_715	N	NA	19	22	27	1	1	2	72	3	65	3	1	0
Cl_cpe-2017_9650	CCUGUAUACAUAGCUUCUCC	20	SupFam_343	N	Y	23	58	59	0	1	0	141	73	64	4	0	0
Cl_cpe-2017_9664	CGCAAGUCUCCUUGGCUAUC	20	SupFam_333	N	Y	8	16	44	0	0	0	68	64	3	1	0	0
Cl_cpe-2017_9684	CGUCCCUACGUCACCAAGUGAUUU	24	SupFam_74	N	Y	21	27	53	0	0	0	101	0	0	0	12	89
Cl_cpe-2017_9686	AUUCUUACUAAUAUUAGGGACU	22	SupFam_129	N	Y	20	77	57	0	0	1	155	2	24	75	12	42
Cl_cpe-2017_9793	UGCUCGAGCUGAUGAGGAAGACGU	24	SupFam_291	N	N	23	25	31	6	5	0	90	0	0	1	5	84
Cl_cpe-2017_10022	CUACCGCUCGUUUAUCAACUCAUU	24	SupFam_1298	N	NA	30	46	34	3	0	8	121	0	0	27	19	75
Cl_cpe-2017_10550	CAGGAAGAAAGAAAAUGUAGA	21	SupFam_77	N	Y	20	34	24	1	1	0	80	1	55	19	5	0
Cl_cpe-2017_10688	UUGGAAGCCACAGAUGCAAGC	21	SupFam_710	N	NA	25	49	27	4	2	6	113	6	81	23	3	0
Cl_cpe-2017_11086	UGGUGAGACUACAGAGAUAAAA	22	SupFam_326	ccm-MIR12493*	Y	24	27	15	0	0	0	66	4	11	49	2	0
Cl_cpe-2017_11123	UAGAUGAAAUGAAUUUGGAGUAU	23	SupFam_337	N	N	18	42	41	2	1	6	110	0	9	19	54	28
Cl_cpe-2017_11184	GAGAUGGUGGAUGAAUCUACC	21	SupFam_54	ccm-MIR12476a*	Y	6	62	15	0	0	0	83	2	80	1	0	0
Cl_cpe-2017_11240	UGAAGCAUUCCAUUCUGCUAG	21	SupFam_113	N	NA	18	44	31	0	2	1	96	3	60	30	3	0
Cl_cpe-2017_11470	AUCCUGAAUCCUCUAAGUUUC	21	SupFam_1299	N	NA	11	18	27	3	2	0	61	7	54	0	0	0
Cl_cpe-2017_12103	GGCAAUUCAUCCUUGACUUCU	21	SupFam_718	N	NA	6	34	35	0	5	3	83	5	75	2	1	0
Cl_cpe-2017_12253	GAUAAAGGAGACUAGGAAGUU	21	SupFam_339	N	Y	15	19	21	0	0	0	55	1	49	4	1	0
Cl_cpe-2017_12425	UCACUUCUUUCCAUCCAUUC	20	SupFam_75	N	Y	17	34	27	2	0	2	82	55	26	1	0	0
Cl_cpe-2017_12432	AGAUAUGGAAGAUUGACUAGGUCU	24	SupFam_118	N	N	14	27	24	3	3	3	74	0	0	2	15	57
Cl_cpe-2017_12550	CAAAGCGGAAAGGUUUGCCU	20	SupFam_1300	N	NA	18	43	48	3	1	4	117	73	36	8	0	0
Cl_cpe-2017_12906	GACCCUGAGUACUUCCAAUUA	21	SupFam_10	N	NA	8	37	38	0	1	0	84	26	52	3	3	0
Cl_cpe-2017_13081	UCUUCAAAAUCGCUACAUCUCC	22	SupFam_328	ccm-MIR12481*	Y	19	32	26	0	0	0	77	4	16	55	2	0
Cl_cpe-2017_13205	ACUGUUAAGAAACUGAAACU	20	SupFam_723	N	NA	8	37	30	0	0	0	75	67	7	1	0	0
Cl_cpe-2017_13233	GAUUGCUGAAAAAGAAGAAUG	21	SupFam_125	N	Y	8	14	27	0	0	0	49	4	41	4	0	0
Cl_cpe-2017_13294	UGAAUUGUCUCUGAAGCUGACU	22	SupFam_65	N	Y	17	34	26	1	1	2	81	6	21	50	4	0
Cl_cpe-2017_13372	AGUAUCUCUGUGUACAAUCUUC	22	SupFam_134	N	Y	12	58	41	0	0	1	112	0	16	47	40	9
Cl_cpe-2017_13536	UCUCCAAACUCAUUUCAUCUGC	22	SupFam_717	N	NA	14	27	24	0	1	1	67	1	4	52	9	1
Cl_cpe-2017_13564	CUUCCAAGUCUCCUUUGAUCGA	22	SupFam_726	N	NA	11	27	21	4	1	1	65	4	4	40	8	9
Cl_cpe-2017_13687	UCCGACUUUGUGAAAUGACC	20	SupFam_1301	N	NA	29	14	65	1	2	4	115	93	17	5	0	0
Cl_cpe-2017_13741	UCUAUGAAUACAUGCAAAUG	20	SupFam_28	N	Y	11	41	45	0	0	0	97	54	39	4	0	0
Cl_cpe-2017_14024	UGCGAUUCCGACUUUUGCCUUUUU	24	SupFam_50	N	Y	33	67	74	0	0	0	174	0	0	11	36	127
Cl_cpe-2017_14106	CGGUACCGAGGUACUGUAACGUGU	24	SupFam_1302	N	NA	16	29	9	3	2	1	60	0	0	2	10	48
Cl_cpe-2017_14255	CGUACUUAGUAUUUAUAUUUCU	22	SupFam_722	N	NA	11	40	34	0	1	0	86	1	26	45	1	13
Cl_cpe-2017_14364	UAUUCGGGAGCAGCGUAGCCCAA	23	SupFam_124	N	N	15	36	35	0	0	0	86	0	6	25	42	13
Cl_cpe-2017_14409	GGACUUCAUAUGGAGGGCUGACGU	24	SupFam_1303	N	NA	56	101	41	11	22	7	238	0	0	1	16	221
Cl_cpe-2017_15017	UGGAAGUUCAGGUGUUGGUAC	21	SupFam_11	N	Y	11	18	27	0	1	0	57	1	52	3	1	0
Cl_cpe-2017_15023	CCGGUUCCAUUCUCAUGACA	20	SupFam_61	N	Y	21	32	22	1	0	0	76	71	5	0	0	0
Cl_cpe-2017_15118	GCGACCCCAGGUCAGGCGGA	20	SupFam_725	N	NA	25	30	53	0	9	2	119	73	41	5	0	0
Cl_cpe-2017_15654	ACUCUAGGUCAAGGUAUCCGAU	22	SupFam_256	N	NA	13	8	25	0	0	0	46	1	5	39	1	0
Cl_cpe-2017_16113	AGUUUCAGAGGGCUUCGUACCUUA	24	SupFam_1304	N	NA	14	36	17	0	2	6	75	0	0	17	18	40
Cl_cpe-2017_16668	GGGUUGUGGUCACGGGAAGAAA	22	SupFam_724	N	NA	9	24	10	0	0	0	43	4	3	36	0	0
Cl_cpe-2017_16921	GCGGAUAUAGUCGAAUGGCU	20	SupFam_132	N	N	32	22	45	0	0	0	99	97	2	0	0	0
Cl_cpe-2017_17121	GAAUAUGGUGAGCAAGAGAUU	21	SupFam_341	N	Y	13	48	49	0	0	0	110	4	86	14	6	0
Cl_cpe-2017_17341	UUUGACAUGAUUUCUGGUCCU	21	SupFam_200	N	N	23	43	36	3	4	0	109	7	84	18	0	0
Cl_cpe-2017_17400	CUCUGCAUCUUCAUUCCAUC	20	SupFam_25	N	Y	20	29	34	1	4	5	93	55	38	0	0	0
Cl_cpe-2017_17442	UAGUGGUGUUCUUUCGUUUUA	21	SupFam_199	N	Y	6	15	14	1	0	0	36	1	31	2	2	0
Cl_cpe-2017_17752	AGCCGUGCAGCUCAAACAACU	21	SupFam_720	N	NA	13	21	13	0	1	0	48	0	41	7	0	0
Cl_cpe-2017_18530	CGAACCUUUCCGCUUUAAUU	20	SupFam_731	N	NA	9	15	29	0	0	0	53	42	5	6	0	0
Cl_cpe-2017_18907	UGCUGUAACUUGGGUUUAUGUUUU	24	SupFam_1305	N	NA	11	21	14	0	1	3	50	0	0	1	10	39
Cl_cpe-2017_19335	GAUCCAGAAUACUUUCACAUUA	22	SupFam_10	N	NA	15	24	13	0	0	1	53	0	19	31	0	3
Cl_cpe-2017_19947	UGUCUCUUUUACAAUGCAAUU	21	SupFam_8	N	Y	38	55	46	4	1	9	153	54	72	23	4	0
Cl_cpe-2017_21274	GAAUGGAUGGAAAGAAGUGU	20	SupFam_17	N	Y	14	20	19	3	1	2	59	50	9	0	0	0
Cl_cpe-2017_21414	GUCUAUGAAUACAUGCAAAC	20	SupFam_28	N	Y	5	17	21	0	0	0	43	39	2	2	0	0
Cl_cpe-2017_21464	CGACGAUCGGAUGGGUCGGCC	21	SupFam_1306	N	NA	25	66	34	0	7	0	132	30	45	41	16	0
Cl_cpe-2017_21954	UAGCAGCAAAUGUGACAGCAUA	22	SupFam_133	N	Y	5	30	20	0	3	2	60	2	7	46	5	0
Cl_cpe-2017_22010	UACUCAGGGUCAAGAUACCCCAC	23	SupFam_295	N	Y	8	36	19	1	0	4	68	0	4	14	30	20
Cl_cpe-2017_22365	CCCUUUGUCGCUAAGAUUCGAUU	23	SupFam_55	N	N	15	17	29	2	0	3	66	0	1	2	52	11
Cl_cpe-2017_23892	UGAAAUUCUUGGUGGCACCCCU	22	SupFam_26	N	Y	7	18	14	0	0	0	39	0	0	38	1	0
Cl_cpe-2017_24173	AAUGGAUGGAAAGAAGUGCGU	21	SupFam_17	N	Y	18	21	27	1	0	0	67	6	41	14	6	0
Cl_cpe-2017_25056	CACUCUAGAUCUAAGUAACC	20	SupFam_257	N	NA	25	24	28	1	1	2	81	56	23	2	0	0
Cl_cpe-2017_25441	UGUCUCUUUUACAAUGUUUU	20	SupFam_8	N	Y	14	24	25	0	0	0	63	38	12	13	0	0
Cl_cpe-2017_26391	UCUGGGAUGAAUUUGGAUCUU	21	SupFam_647	N	NA	15	32	38	0	1	0	86	37	31	12	6	0
Cl_cpe-2017_27244	GCCGAAUUUGGAAUUCCUUGGC	22	SupFam_728	N	NA	14	11	8	0	0	0	33	0	5	28	0	0
Cl_cpe-2017_28103	CGUCAUUCUUUAUUCGUGGUC	21	SupFam_51	N	Y	6	16	16	0	0	0	38	4	30	4	0	0
Cl_cpe-2017_28462	CUGUUGAAGUAUUAGGCAGCU	21	SupFam_730	N	NA	2	16	15	0	0	1	34	1	32	1	0	0
Cl_cpe-2017_28617	UGAGAGAAAGCUGAUGCAGAU	21	SupFam_719	N	NA	6	6	15	0	0	0	27	0	26	1	0	0
Cl_cpe-2017_28898	UUGGAUGUUAUUUAUGCUACU	21	SupFam_1307	N	NA	10	9	8	1	0	0	28	3	22	3	0	0
Cl_cpe-2017_29015	CCAUGAUUUGCAGACGAGAAUU	22	SupFam_27	N	Y	18	29	63	0	0	0	110	9	24	42	27	8
Cl_cpe-2017_29115	UAAUUUGUUUGAGCUGCACGGC	22	SupFam_727	N	NA	8	13	26	0	2	2	51	4	19	26	0	2
Cl_cpe-2017_30315	UCCGAUGUCGUCCAGCGGUUAGA	23	SupFam_470	N	N	8	18	44	3	0	1	74	0	1	22	48	3
Cl_cpe-2017_31604	AGCUUGACUCUAGUCCGACUUUGC	24	SupFam_1308	N	NA	18	6	21	2	0	2	49	0	0	0	17	32
Cl_cpe-2017_31829	AAAGGAUUGGCUCUGAGGGCC	21	SupFam_1309	N	NA	9	16	34	2	2	2	65	5	44	16	0	0
Cl_cpe-2017_32529	AGGUAACUCAACUAUCCCAUC	21	SupFam_729	N	NA	9	9	5	0	0	0	23	1	21	1	0	0
Cl_cpe-2017_32684	AGUGUCUCUUUUACAAUGCAAC	22	SupFam_8	N	Y	12	22	11	1	0	0	46	4	21	21	0	0
Cl_cpe-2017_32912	CGAGAUCUCUAAUAGAAGCUUUUU	24	SupFam_447	N	NA	6	11	10	0	0	0	27	0	0	1	2	24
Cl_cpe-2017_33377	UCUGCAUGUAUUCAUAAACAAUUU	24	SupFam_1	N	Y	9	18	23	1	0	0	51	0	0	4	11	36
Cl_cpe-2017_34283	CGUUUGCAAAUCAUGGUGCACCA	23	SupFam_117	N	Y	10	8	2	0	0	0	20	0	0	1	19	0
Cl_cpe-2017_34407	CUGUCGGGACCCGAAAGAUGGC	22	SupFam_467	N	N	4	6	32	1	1	0	44	14	2	28	0	0
Cl_cpe-2017_35484	UUGCUGAUGUUUGGGACGAC	20	SupFam_21	N	Y	8	12	18	0	2	0	40	23	12	5	0	0
Cl_cpe-2017_35718	UCCAAAGGGAUCGCAUCCCU	20	SupFam_1310	N	NA	2	18	6	0	0	0	26	26	0	0	0	0
Cl_cpe-2017_37149	UUAUGAAGGUCUGUUUCCCC	20	SupFam_128	N	Y	19	25	17	0	2	0	63	26	30	7	0	0
Cl_cpe-2017_37170	CAGCCCUUUGUCGCUAAGAUUCCC	24	SupFam_1311	N	NA	8	7	10	0	0	0	25	0	0	4	2	19
Cl_cpe-2017_37189	UCUCGAUCUUGUGCCAUGAA	20	SupFam_1312	N	NA	14	11	26	0	2	0	53	34	19	0	0	0
Cl_cpe-2017_37371	UCAAAUCCGGGUGCCGCCUCCA	22	SupFam_1313	N	NA	8	11	35	0	4	0	58	19	2	17	15	5
Cl_cpe-2017_37427	AGAGCUUUCUUCGGUCCACA	20	SupFam_415	N	NA	7	16	18	0	0	0	41	35	6	0	0	0
Cl_cpe-2017_37481	AGGUGCUCAAGGUUCAGAAUA	21	SupFam_258	N	NA	1	9	11	0	0	0	21	2	17	1	1	0
Cl_cpe-2017_37983	GAUGGAGAAGCAGGGUACAUG	21	SupFam_187	N	NA	3	7	10	0	0	0	20	0	20	0	0	0
Cl_cpe-2017_38035	CGCGGAUUACGGUGGCGGCU	20	SupFam_1314	N	NA	8	15	17	2	1	0	43	24	19	0	0	0
Cl_cpe-2017_38671	UGCUAACGCAAUGUGAUUUCUGCU	24	SupFam_1315	N	NA	23	9	46	3	1	3	85	0	0	10	32	43
Cl_cpe-2017_39676	UCUGAUUCCGCAUCACUUUUG	21	SupFam_1316	N	NA	4	14	11	1	0	0	30	1	27	2	0	0
Cl_cpe-2017_40348	AGAAGCCACUAAGAACUUUU	20	SupFam_255	N	NA	5	8	11	0	0	0	24	17	5	2	0	0
Cl_cpe-2017_40934	UCACUGAGAAGUUGAGUGCUAAA	23	SupFam_24	N	Y	10	23	20	0	0	0	53	0	2	9	37	5
Cl_cpe-2017_42324	GGUUCAUGAUUCCCAUUUGA	20	SupFam_1317	N	NA	4	8	13	0	0	0	25	15	9	1	0	0
Cl_cpe-2017_43398	GAAUAAAGAAAGGCGACUUGU	21	SupFam_16	N	Y	7	22	10	0	0	0	39	3	25	9	2	0
Cl_cpe-2017_43450	AGGAAUUGCCACCAUCCUUUUC	22	SupFam_332	ccm-MIR12484*	Y	3	19	8	0	1	0	31	1	11	18	1	0
Cl_cpe-2017_43524	GCAGAUGAUGGGCUCUGCAGAUUG	24	SupFam_1318	N	NA	14	45	14	4	2	2	81	0	0	3	22	56
Cl_cpe-2017_44211	AGGAUGAAUUGCCGUGGUAGC	21	SupFam_732	N	NA	4	8	18	0	0	0	30	0	23	7	0	0
Cl_cpe-2017_45017	CGAUCGAGGAGAUGGUGCACCA	22	SupFam_7	N	Y	3	7	9	0	0	0	19	0	1	17	1	0
Cl_cpe-2017_46212	GAAUGGAAAUGUCUAGGUGGUU	22	SupFam_1319	N	NA	5	8	5	0	0	0	18	0	0	18	0	0
Cl_cpe-2017_46554	UUGCACUUGUUUUGUUGCUUUG	22	SupFam_1320	N	NA	3	6	11	0	0	0	20	0	0	19	1	0
Cl_cpe-2017_46971	CAGCUUGAAAUGUAGUAUCCUGAA	24	SupFam_52	N	Y	11	9	31	0	0	2	53	0	0	6	19	28
Cl_cpe-2017_47185	UCAAAUCCUAUUGGACGCACCA	22	SupFam_1321	N	NA	5	18	25	1	1	0	50	18	5	17	10	0
Cl_cpe-2017_47741	CGAUCGAGGAGAUGAUGCGCCUUU	24	SupFam_7	N	Y	3	6	26	0	0	0	35	0	0	0	4	31
Cl_cpe-2017_47898	CGAGCGACAAUAUGUUUUCC	20	SupFam_9	N	Y	8	30	12	0	1	1	52	25	27	0	0	0
Cl_cpe-2017_48221	CUUUAAUAACAAAGAUACAGC	21	SupFam_448	N	NA	3	11	13	0	0	0	27	1	20	5	1	0
Cl_cpe-2017_48469	UGAGGGCUGGGCUCGGGGGUCU	22	SupFam_1322	N	NA	19	8	48	0	1	1	77	1	7	19	42	8
Cl_cpe-2017_48613	UUGAAGAGGACUUGGAAUUUUUU	23	SupFam_558	N	NA	24	35	19	2	2	1	83	0	7	28	34	14
Cl_cpe-2017_48674	GGGUGUAGAAAAUUGCAUUU	20	SupFam_1323	N	NA	6	16	9	0	0	1	32	23	7	2	0	0
Cl_cpe-2017_48901	GGAGAGAUGGCUGAGUGGACC	21	SupFam_1324	N	NA	8	14	15	0	1	0	38	14	19	3	2	0
Cl_cpe-2017_51780	UAAGUCGUUCAUGUGCAUCCCU	22	SupFam_39	N	Y	7	14	10	0	0	0	31	0	7	24	0	0
Cl_cgr-dp_2	UGAAGAUGAUCUGAAAUGCUU	21	SupFam_29	N	NA	31736	34371	41908	192	328	563	109098	1229	107609	202	58	0
Cl_cgr-dp_4	UUGCCAGUUAGUGUGCUGAAUU	22	SupFam_344	N	NA	18311	24484	30646	212	258	577	74488	191	4351	69504	332	110
Cl_cgr-dp_5	UGUUGUGUGAUCUUUCGAGAGU	22	SupFam_41	N	NA	22256	19151	29411	36	35	56	70945	439	4356	64054	1693	403
Cl_cgr-dp_6	UGUCAUCGACUCCGUACAAGCA	22	SupFam_5	N	Y	25147	16234	19854	126	141	188	61690	79	4068	57343	137	63
Cl_cgr-dp_8	UUUUUACUCUCAAGACGCUGU	21	SupFam_142	N	NA	13568	12535	12512	122	132	292	39161	483	38485	184	9	0
Cl_cgr-dp_9	UCCCUCGGUGGUUUUUGACUU	21	SupFam_201	N	NA	13000	11145	11809	52	56	97	36159	941	34893	271	54	0
Cl_cgr-dp_10	GAGGAAGUAUGGCAUGAAGAC	21	SupFam_22	N	Y	14068	9112	12892	46	92	153	36363	905	34294	1147	17	0
Cl_cgr-dp_11	GAGCAUGUGUUUAAGAUGGUG	21	SupFam_345	N	NA	8523	8971	13037	47	117	197	30892	722	30028	133	9	0
Cl_cgr-dp_13	UGUAUAGUUUCUGCCACUCGU	21	SupFam_78	N	NA	10167	8234	8788	38	57	60	27344	80	27134	115	15	0
Cl_cgr-dp_14	CUUGUACGGAGCGAUGACAAC	21	SupFam_40	N	Y	7979	6930	10658	40	54	86	25747	480	24943	312	12	0
Cl_cgr-dp_16	CGUGUACCCUGGUUCUCCACC	21	SupFam_2	N	Y	12009	8271	7885	268	371	229	29033	304	28570	116	43	0
Cl_cgr-dp_18	GUGAGCUUGACAGGUAGCAAUU	22	SupFam_202	N	NA	6610	7629	8984	18	19	32	23292	53	2253	20960	20	6
Cl_cgr-dp_19	UUCUUUCAAACGUGUGACCU	20	SupFam_14	N	NA	20305	14926	19054	70	77	136	54568	29217	23783	1568	0	0
Cl_cgr-dp_21	UGGAAAAAUCAGCUCUAGGUU	21	SupFam_30	N	NA	11044	8381	9012	51	61	96	28645	348	18971	9221	105	0
Cl_cgr-dp_22	UGGCGGAGGAAUAACAUCUU	20	SupFam_203	N	NA	5744	4735	6530	33	56	101	17199	16815	369	15	0	0
Cl_cgr-dp_24	AUCAAGGAGGCUCUAGCUAAU	21	SupFam_204	N	NA	6081	4488	5695	32	48	90	16434	156	16106	156	16	0
Cl_cgr-dp_25	AGGUAUUUUGAACAGCUUCUC	21	SupFam_346	N	NA	6128	4855	5778	71	64	170	17066	552	16292	214	8	0
Cl_cgr-dp_28	GAAGCUGUUCAAAAUACCGAG	21	SupFam_347	N	NA	6442	5807	6012	14	25	37	18337	1096	14651	2546	44	0
Cl_cgr-dp_29	UGAAGUUUCUCGUGGCGUUUU	21	SupFam_26	N	Y	7198	7424	9606	17	40	67	24352	1143	18451	4657	101	0
Cl_cgr-dp_30	GCAAGAACCUCAACUUCCAUG	21	SupFam_184	N	NA	5475	3521	4857	6	8	9	13876	161	13692	18	5	0
Cl_cgr-dp_32	UUGGUAGUAAUUAUGAUUUUGC	22	SupFam_892	N	NA	5429	5814	7209	174	319	362	19307	646	3371	15251	29	10
Cl_cgr-dp_34	UUGCUGCAUGUCAAGCUCACAC	22	SupFam_79	N	NA	5947	4756	5242	36	24	57	16062	261	2484	13124	180	13
Cl_cgr-dp_35	AGAAGAAGAUGAGAAACUCAUA	22	SupFam_80	N	NA	4076	3314	4666	7	13	16	12092	26	741	10988	166	171
Cl_cgr-dp_36	UAAGAGAUGAAGGAAGAAGAC	21	SupFam_205	N	NA	4963	3154	4458	19	36	122	12752	360	11758	602	32	0
Cl_cgr-dp_38	CGGCAUGAACCCAAAGAUUUUU	22	SupFam_348	N	NA	4744	5176	5690	3	6	14	15633	99	1705	13600	205	24
Cl_cgr-dp_39	UGGCAUUUCGUUAUUAUGACUC	22	SupFam_349	N	NA	3133	4080	6339	31	51	64	13698	15	250	13347	60	26
Cl_cgr-dp_40	AACGUCACGAGGAAUUUCAUA	21	SupFam_31	N	NA	8402	5033	5388	24	27	69	18943	1534	10896	6462	51	0
Cl_cgr-dp_42	UGAGUCCUCUAAGUUUCUUCUU	22	SupFam_81	N	NA	3982	3149	3055	7	20	13	10226	25	160	10003	33	5
Cl_cgr-dp_43	ACAGAACUGAAUGACGACUCGU	22	SupFam_471	N	NA	4167	3286	3412	3	3	14	10885	10	349	10416	104	6
Cl_cgr-dp_44	GUCAAAAACCACUGUGGAAUU	21	SupFam_350	N	NA	4055	3324	4146	0	1	2	11528	340	9684	1488	16	0
Cl_cgr-dp_45	CUUCUUGCCGUAUUUCCUCUA	21	SupFam_3	N	Y	4280	3718	4105	16	26	34	12179	3268	8884	23	4	0
Cl_cgr-dp_47	UAAGUGGUUCAUGUGCUUCGCU	22	SupFam_39	N	Y	3643	3677	4192	12	22	36	11582	28	625	10450	466	13
Cl_cgr-dp_48	UUGCGAGGUGUAAAAUGGUGUU	22	SupFam_82	N	NA	5023	4894	6157	17	32	61	16184	4691	1937	9430	103	23
Cl_cgr-dp_50	CCCGGAUAUAUGGCACCUGUU	21	SupFam_83	N	NA	3071	5478	2366	3	12	14	10944	118	10760	59	7	0
Cl_cgr-dp_53	UUAAGGGGUAACUUGCGGAACC	22	SupFam_42	N	NA	4362	3463	4120	32	42	56	12075	116	1431	10499	26	3
Cl_cgr-dp_56	CAAUAAGAGUUGUAGUAUCCAU	22	SupFam_472	N	NA	3322	3033	3654	15	16	41	10081	215	376	8603	854	33
Cl_cgr-dp_58	UGGCAAAAGUAGGACUCGCAAU	22	SupFam_6	N	Y	3178	2322	2181	28	48	92	7849	101	112	7415	178	43
Cl_cgr-dp_59	UACCGGGUAAUCUUGUUGCAU	21	SupFam_351	N	NA	2225	2697	3562	15	31	42	8572	258	7608	695	11	0
Cl_cgr-dp_60	GAAUGAUAAGUAGGGGUGAGC	21	SupFam_23	N	NA	3214	2197	2730	19	12	14	8186	21	7743	412	10	0
Cl_cgr-dp_61	GAGGAGGGUGAAUGUAUCUGU	21	SupFam_56	N	NA	2757	2843	2832	5	5	7	8449	104	7610	668	67	0
Cl_cgr-dp_63	GCUAGAAUUGACUGUGUUAAGA	22	SupFam_352	N	NA	2228	2112	2691	2	0	1	7034	22	250	6059	90	613
Cl_cgr-dp_67	UCACCUCUACCUGUCAUUCUG	21	SupFam_4	N	NA	2329	1615	2322	146	169	248	6829	152	6135	537	5	0
Cl_cgr-dp_68	AAAUCUUUGGGAUCAAGUCGGC	22	SupFam_143	N	NA	3574	2970	4018	6	4	12	10584	11	91	10073	343	66
Cl_cgr-dp_70	CGGUAGAACAAAUCUUUCAUU	21	SupFam_84	N	NA	2059	2108	2391	2	5	0	6565	55	5870	612	28	0
Cl_cgr-dp_72	GGAAAUUUCUCUGCUGGAGC	20	SupFam_32	N	NA	1708	2195	3723	1	3	5	7635	6280	1242	113	0	0
Cl_cgr-dp_73	GAAUACGGGUGGAAGCAGACA	21	SupFam_85	N	NA	2452	1623	2092	2	2	1	6172	406	5340	135	291	0
Cl_cgr-dp_75	GCUACAUAGUCAAUGGGAUGGU	22	SupFam_353	N	NA	2379	1921	2251	7	6	23	6587	11	191	5880	489	16
Cl_cgr-dp_76	GGAUAUUAGAACUCUUAUUGUU	22	SupFam_893	N	NA	1673	2128	2606	0	1	3	6411	15	180	5876	333	7
Cl_cgr-dp_77	UGGAAGUUGUGGUGCUUGCAC	21	SupFam_11	N	Y	1821	1552	2580	17	24	36	6030	335	5591	91	13	0
Cl_cgr-dp_78	AGAAAGCAUCAUAGUAUCCUG	21	SupFam_18	N	Y	2848	2023	2743	8	7	22	7651	67	7246	325	13	0
Cl_cgr-dp_79	GGUGAUCCUGUUGGUCUACAUC	22	SupFam_354	N	NA	1279	1825	2262	1	7	7	5381	23	115	5158	82	3
Cl_cgr-dp_80	UAAUCUUUCAAGAUAUGCGAA	21	SupFam_206	N	NA	1159	1307	2201	4	13	21	4705	92	4586	24	3	0
Cl_cgr-dp_81	UAAAUGUGAAGUCUGAGUCUU	21	SupFam_355	N	NA	2104	1828	1728	6	8	17	5691	423	5126	105	37	0
Cl_cgr-dp_82	AAUGCGAUCCCUUUGAACAUC	21	SupFam_13	N	Y	1885	1292	1706	95	99	130	5207	74	5066	64	3	0
Cl_cgr-dp_83	UGAUUAUGUCUCCUGGUACUAGCC	24	SupFam_33	N	NA	2741	3023	3850	8	7	13	9642	0	0	2200	750	6692
Cl_cgr-dp_89	UUUUCCGUUGAGAAGUUUCCUA	22	SupFam_44	N	NA	1577	1671	2484	9	11	13	5765	99	1311	4257	82	16
Cl_cgr-dp_91	UCUGGAAUUUUUGGUGGAGAC	21	SupFam_207	N	NA	1609	1314	2124	12	15	40	5114	110	4783	213	8	0
Cl_cgr-dp_93	CACCCCAUUUUCUAUGUAGUUU	22	SupFam_356	N	NA	2443	2285	2403	18	19	50	7218	48	309	6788	71	2
Cl_cgr-dp_96	CGUGGAUCAACAGGGACACCUU	22	SupFam_357	N	NA	1351	1586	1567	25	18	42	4589	14	125	4416	26	8
Cl_cgr-dp_97	GAAGAAACACGAGGACUCAUG	21	SupFam_86	N	NA	1989	1309	1485	2	3	4	4792	563	4202	22	5	0
Cl_cgr-dp_98	GGAAUGGAACCAACACAGGU	20	SupFam_894	N	NA	1378	1311	1691	10	21	31	4442	4409	32	1	0	0
Cl_cgr-dp_99	UAUUGUUGGGAGGAUUACUUAUC	23	SupFam_43	N	NA	1874	1721	2442	14	19	30	6100	0	373	1352	4280	95
Cl_cgr-dp_103	UAGCUAGAGCCUCCUUGGUCA	21	SupFam_358	N	NA	1582	1302	1505	1	6	8	4404	598	3793	5	8	0
Cl_cgr-dp_105	UGCGAUUCCUACUCUUGCCGUG	22	SupFam_50	N	Y	3339	2478	2631	5	12	5	8470	10	650	7442	363	5
Cl_cgr-dp_106	CGUGCAAGGUUUGGAAGAAG	20	SupFam_473	N	NA	2269	1813	2558	0	0	0	6640	3701	2790	149	0	0
Cl_cgr-dp_107	CUUCAUGGAAUGGAGUCUCCU	21	SupFam_474	N	NA	1542	1725	2145	7	23	30	5472	444	4568	448	12	0
Cl_cgr-dp_111	UCUGUUUCCACCCGCAUUCUU	21	SupFam_87	N	NA	1302	1204	1480	16	13	24	4039	106	3786	60	87	0
Cl_cgr-dp_113	UAGGACAAAGAAGACGUGGAA	21	SupFam_208	N	NA	1843	1079	1471	14	9	25	4441	315	3791	316	19	0
Cl_cgr-dp_115	UGGGAGAGGAUAUAAUGACAU	21	SupFam_144	N	NA	1620	974	1270	10	11	24	3909	179	3665	52	13	0
Cl_cgr-dp_116	UCUGAUGAGUGUUGUCUCUUC	21	SupFam_223	N	NA	930	1372	1957	1	5	19	4284	523	3731	29	1	0
Cl_cgr-dp_117	UUUUGCAAAAAAUCAGACCAG	21	SupFam_101	N	NA	914	1029	1625	5	4	12	3589	41	3477	66	5	0
Cl_cgr-dp_118	UGGCAUUGAAGAAUACAACGA	21	SupFam_145	N	NA	1226	1141	1510	13	27	24	3941	400	3390	127	24	0
Cl_cgr-dp_119	AUCAGGACAUUUAAGGUAAUU	21	SupFam_146	N	NA	1249	1072	1301	9	8	24	3663	42	3461	35	125	0
Cl_cgr-dp_123	GGAAUGAUGAAGGAGUGGCGUA	22	SupFam_12	N	Y	1728	1326	1677	1	3	5	4740	152	1271	3139	32	146
Cl_cgr-dp_126	UGAGAAGAUUGUGUAACCCGC	21	SupFam_185	N	NA	1343	944	1367	6	5	10	3675	19	3640	16	0	0
Cl_cgr-dp_130	GGGCAUGGGUGGAGAAACUGAAA	23	SupFam_147	N	NA	1453	860	1137	3	4	4	3461	0	85	334	2826	216
Cl_cgr-dp_137	CCAGUCAGCUGAUGUCUUGUC	21	SupFam_148	N	NA	1152	1072	1203	12	26	39	3504	360	3120	17	7	0
Cl_cgr-dp_138	AGGUCAAUCAGUGGAAAUGGAG	22	SupFam_88	N	NA	2897	1777	1847	5	5	13	6544	278	3347	2902	13	4
Cl_cgr-dp_139	UGGAUUCUAUUUCGACGCUAC	21	SupFam_149	N	NA	2829	1963	2071	7	8	27	6905	27	4388	2465	25	0
Cl_cgr-dp_141	UUAGCACAGUCAGUUCUAGCUC	22	SupFam_475	N	NA	984	1055	1248	11	15	26	3339	28	37	3194	16	64
Cl_cgr-dp_143	AGCGUCGAACUAGGAUUCAUU	21	SupFam_476	N	NA	1146	1094	1263	10	19	20	3552	17	2817	702	16	0
Cl_cgr-dp_144	CUAGUAUCAGGAGACUUAAUCAAU	24	SupFam_89	N	NA	814	1041	1288	0	0	2	3145	0	0	344	179	2622
Cl_cgr-dp_146	UUGUAGGGAAGUUUGUUGCAA	21	SupFam_477	N	NA	623	808	1407	5	4	11	2858	265	2461	126	6	0
Cl_cgr-dp_151	UUCGGUAGAAUCAGAAGCCCC	21	SupFam_57	N	NA	1630	1345	1457	12	20	39	4503	75	3279	801	348	0
Cl_cgr-dp_153	CGAGUGACAAUAUGUUUUCCC	21	SupFam_9	N	Y	959	1163	1558	15	9	14	3718	67	3479	149	23	0
Cl_cgr-dp_156	CUUGUGGAGAUCGUCGAUGAU	21	SupFam_478	N	NA	826	732	1009	2	2	3	2574	39	2473	61	1	0
Cl_cgr-dp_157	UUCAGCACACUAACUGACAAGU	22	SupFam_359	N	NA	514	968	1368	3	7	18	2878	14	189	2588	71	16
Cl_cgr-dp_160	GUUAUGGUGUAGAACUUGAGU	21	SupFam_479	N	NA	837	890	1052	0	1	3	2783	72	2400	294	17	0
Cl_cgr-dp_162	UUUCGGUGAAAAAGCUAAGAUGUA	24	SupFam_90	N	NA	1316	1592	2199	1	4	3	5115	0	0	912	1965	2238
Cl_cgr-dp_167	UACGGCGGUGGAAUAACAUCAC	22	SupFam_360	N	NA	736	672	1068	5	8	29	2518	58	56	2307	94	3
Cl_cgr-dp_169	UGAGUUCGGGUUGAGUUUCCA	21	SupFam_150	N	NA	878	677	949	9	12	17	2542	266	2082	72	122	0
Cl_cgr-dp_171	UGAAGAUUAUCUGAAAGGCUC	21	SupFam_29	N	NA	1307	1500	1374	10	13	19	4223	504	3645	68	6	0
Cl_cgr-dp_177	GAAACUCAACCCGAACUCAAA	21	SupFam_480	N	NA	1420	681	666	4	3	1	2775	147	1978	642	8	0
Cl_cgr-dp_185	UAAGACGGUUGAGGUGAACCA	21	SupFam_34	N	NA	484	746	829	4	6	15	2084	167	1875	25	17	0
Cl_cgr-dp_189	UCAGCCUCUUCACCUAGACCCAA	23	SupFam_209	N	NA	868	614	711	8	15	10	2226	0	94	368	1672	92
Cl_cgr-dp_190	UCUUCCAAUCCUUGCAUGCA	20	SupFam_895	N	NA	593	471	718	4	6	8	1800	1781	14	5	0	0
Cl_cgr-dp_194	CCACGGUGAUCUUUAACCCUC	21	SupFam_115	N	NA	690	714	852	9	2	7	2274	111	2035	115	13	0
Cl_cgr-dp_197	CGCAAUCGAGUCGAUAACCUAU	22	SupFam_210	N	NA	1054	1101	1370	4	6	10	3545	95	205	2401	841	3
Cl_cgr-dp_199	GAGAGGGUAUUGAAGUUUGGGU	22	SupFam_211	N	NA	1426	921	967	17	9	41	3381	14	1505	1815	34	13
Cl_cgr-dp_200	GAGAAGUAGUUGGCGGUUGGCC	22	SupFam_54	N	Y	1189	1064	1212	7	7	16	3495	8	922	2485	78	2
Cl_cgr-dp_216	CAGUAGUUCUCUCUGCCACCAA	22	SupFam_151	N	NA	959	595	505	4	9	5	2077	82	509	1479	6	1
Cl_cgr-dp_224	UGAAAUUCCUAGUAGCAUUCC	21	SupFam_26	N	Y	870	726	1063	3	5	12	2679	130	1884	635	30	0
Cl_cgr-dp_225	UUGAAGAACAAGUACUAGGGUU	22	SupFam_361	N	NA	479	589	731	0	4	3	1806	12	105	1572	116	1
Cl_cgr-dp_229	UUUGGAAGUAUUUUGGAUCAA	21	SupFam_36	N	NA	748	764	1127	8	11	33	2691	109	2478	82	22	0
Cl_cgr-dp_238	UUCUCGGGGAGGUGCUUAGUU	21	SupFam_481	N	NA	460	442	578	2	0	2	1484	64	1413	6	1	0
Cl_cgr-dp_240	AUCGAAAGAUUACACGACAUA	21	SupFam_212	N	NA	400	429	653	8	6	11	1507	83	1299	109	16	0
Cl_cgr-dp_244	CAUUAGGGUUUGAAGGUUCCA	21	SupFam_131	N	Y	379	477	550	9	5	14	1434	129	1295	9	1	0
Cl_cgr-dp_247	AAUCACACGUUUGAAAGAAAC	21	SupFam_482	N	NA	1009	813	1106	11	10	29	2978	31	2710	232	5	0
Cl_cgr-dp_254	GGUUGCAGAGAGAACUACUAGU	22	SupFam_58	N	NA	1020	891	916	0	0	0	2827	24	43	1383	1326	51
Cl_cgr-dp_256	GGAUACUACGAUGCUUUCUCU	21	SupFam_362	N	NA	698	870	1063	0	1	1	2633	25	2496	111	1	0
Cl_cgr-dp_261	CUGUGUUGGUUCCAUUCUUG	20	SupFam_896	N	NA	968	645	862	7	12	17	2511	1290	1185	36	0	0
Cl_cgr-dp_269	CCUGGACACUUUGCUUGGAAA	21	SupFam_70	N	Y	390	394	536	2	2	3	1327	86	1175	63	3	0
Cl_cgr-dp_275	UGUGGAUCAUUUGUAGCACUUU	22	SupFam_363	N	NA	461	556	577	1	6	25	1626	15	336	1255	15	5
Cl_cgr-dp_279	UGAGCUUUUCAUCUUCUUCGGGU	23	SupFam_37	N	NA	678	670	905	0	0	5	2258	0	26	444	1742	46
Cl_cgr-dp_285	UUACCUUAAAUGUCCUGAUAC	21	SupFam_152	N	NA	487	536	643	4	4	8	1682	254	1328	94	6	0
Cl_cgr-dp_294	UGGAGUGCGAAGGAGAGAAACG	22	SupFam_483	N	NA	1028	602	830	1	2	1	2464	42	388	2014	20	0
Cl_cgr-dp_300	CAUCAUAGCUUUUUCAUCGAAAUU	24	SupFam_45	N	Y	451	491	711	2	1	6	1662	0	0	199	334	1129
Cl_cgr-dp_307	UGUGGUGGUGGAAUGGAAACUU	22	SupFam_897	N	NA	399	345	424	0	2	1	1171	0	49	1109	10	3
Cl_cgr-dp_312	GUUGUAUUCUUCGGUGCCACA	21	SupFam_213	N	NA	432	365	444	0	0	0	1241	193	1014	10	24	0
Cl_cgr-dp_317	CCAUCUUGAAUACAUGCUCAC	21	SupFam_91	N	NA	783	624	686	10	7	11	2121	516	1566	38	1	0
Cl_cgr-dp_320	GUUACCUCACCAACUCGCCAGU	22	SupFam_484	N	NA	425	346	412	0	1	2	1186	9	120	1052	4	1
Cl_cgr-dp_325	GGGUUUUCGACUCGAUUGCGAA	22	SupFam_485	N	NA	335	323	546	0	2	4	1210	29	180	959	38	4
Cl_cgr-dp_326	GCUGUUAUUCACCUCUUGAUU	21	SupFam_364	N	NA	462	386	436	0	0	0	1284	7	1031	229	17	0
Cl_cgr-dp_330	AGCGGCUUGAGAGUAAAAACU	21	SupFam_186	N	NA	516	316	309	1	2	0	1144	11	1086	46	1	0
Cl_cgr-dp_332	UGAAGGAUUGGUUUCCACCGAA	22	SupFam_365	N	NA	388	326	521	3	5	1	1244	42	92	928	151	31
Cl_cgr-dp_337	UCCCGCGGUGGCCUUUGACUU	21	SupFam_201	N	NA	489	211	362	2	0	3	1067	43	1015	7	2	0
Cl_cgr-dp_340	CCAUCUCCACUGAUUGACCCU	21	SupFam_486	N	NA	817	682	594	3	6	13	2115	303	1402	410	0	0
Cl_cgr-dp_347	GUCCGUGCAGGAGUCGAUCAAA	22	SupFam_898	N	NA	470	293	438	12	23	23	1259	50	184	858	22	145
Cl_cgr-dp_349	UCAGGAGGUGAAAAACAGCAC	21	SupFam_92	N	NA	442	299	397	2	7	10	1157	25	959	165	8	0
Cl_cgr-dp_353	AGAAGCACAUGAACGACUUAAA	22	SupFam_93	N	Y	430	377	493	5	2	7	1314	70	172	862	61	149
Cl_cgr-dp_360	GGGGAAAAAAGAUGAUACGCU	21	SupFam_487	N	NA	455	276	422	1	0	5	1159	50	995	109	5	0
Cl_cgr-dp_367	UGAGAUUUGAGUUUAUGGGGU	21	SupFam_172	N	NA	305	318	339	5	2	3	972	13	945	13	1	0
Cl_cgr-dp_379	GAGUUAAAGAUCAUCGUGGGA	21	SupFam_153	N	NA	300	318	436	1	4	3	1062	72	826	67	97	0
Cl_cgr-dp_406	CGCCACUUCUUCAUCACUCCCA	22	SupFam_73	N	Y	426	330	390	2	1	5	1154	20	279	835	8	12
Cl_cgr-dp_415	UGAAUCUGGUGAUGAGAUCAC	21	SupFam_366	N	NA	291	418	792	0	2	8	1511	8	862	637	4	0
Cl_cgr-dp_418	CUUGUUGUUGUUUCUGAACUC	21	SupFam_367	N	NA	406	285	267	4	4	8	974	59	885	30	0	0
Cl_cgr-dp_422	CGAACGAAAUGAGUUCUUCUUC	22	SupFam_368	N	NA	188	326	472	4	4	7	1001	29	14	906	31	21
Cl_cgr-dp_424	CCUGAUUAUUUUGUUGCUAAC	21	SupFam_488	N	NA	471	467	607	0	1	0	1546	36	859	613	38	0
Cl_cgr-dp_434	AUUUGGAGUGGGCGAGGGACAA	22	SupFam_214	N	NA	346	174	384	0	0	0	904	14	66	782	30	12
Cl_cgr-dp_443	GAAAACAUAUUGUCACUUGUU	21	SupFam_15	N	Y	185	276	453	0	1	10	925	72	844	9	0	0
Cl_cgr-dp_478	UUCCAAACAUCAUCCAGGACA	21	SupFam_112	N	NA	188	203	307	0	1	5	704	41	663	0	0	0
Cl_cgr-dp_479	UGAAGGAGAACUCAUUUCGUU	21	SupFam_394	N	NA	180	271	284	15	35	36	821	6	809	6	0	0
Cl_cgr-dp_499	GGACUCCAUCUCAUGAAGUU	20	SupFam_369	N	NA	249	365	557	0	6	1	1178	751	411	16	0	0
Cl_cgr-dp_519	UAGGAAGUGGCACCAAGAACAU	22	SupFam_489	N	NA	376	354	546	2	0	9	1287	36	546	700	3	2
Cl_cgr-dp_530	UUCUUGAUGGUGUUUGGAAUG	21	SupFam_21	N	Y	214	186	266	0	0	2	668	8	657	3	0	0
Cl_cgr-dp_538	CAGCAGCAGAAUGAUCAGGAA	21	SupFam_490	N	NA	350	169	202	5	1	5	732	92	617	22	1	0
Cl_cgr-dp_539	AGUAUUCUCUUUCAUAAGCUU	21	SupFam_370	N	NA	146	246	327	1	0	0	720	13	703	4	0	0
Cl_cgr-dp_543	AGGAGAACUCAUUUCGUUCAUA	22	SupFam_394	N	NA	400	368	411	1	1	0	1181	11	388	700	21	61
Cl_cgr-dp_553	AUAUCUUUGGGUUCAUAUCGAC	22	SupFam_143	N	NA	214	210	270	0	3	7	704	8	25	659	10	2
Cl_cgr-dp_562	GGACUAUAUACCUUCACAUA	20	SupFam_371	N	NA	166	132	323	0	0	0	621	612	8	1	0	0
Cl_cgr-dp_564	GAGGUUAAGGAGUGUAGUGUUU	22	SupFam_491	N	NA	382	358	366	0	0	1	1107	18	392	695	2	0
Cl_cgr-dp_605	GUUCUUGGUGUCGCUUUCUAAC	22	SupFam_372	N	NA	224	170	227	0	1	2	624	14	35	570	5	0
Cl_cgr-dp_613	GAGUUAAAGAUCAUCGUGGGAUUU	24	SupFam_153	N	NA	177	190	256	0	0	1	624	0	0	0	6	618
Cl_cgr-dp_618	GAUGUUGUUCCUCCUCCAUA	20	SupFam_492	N	NA	163	188	302	0	0	0	653	569	56	28	0	0
Cl_cgr-dp_630	AGGACAAACAUUUGAGAGGAUA	22	SupFam_35	N	Y	222	179	320	0	0	2	723	6	134	578	0	5
Cl_cgr-dp_640	AGUGCUACUAGAAAUUUCAUA	21	SupFam_31	N	NA	241	181	295	1	1	3	722	178	542	1	1	0
Cl_cgr-dp_645	GGAUGCAAAGACUCAAAAUACU	22	SupFam_215	N	NA	256	190	217	0	1	0	664	6	9	642	6	1
Cl_cgr-dp_655	GUCGUGAAUAAUUUGAAGAGCG	22	SupFam_373	N	NA	189	229	424	0	0	0	842	12	183	644	3	0
Cl_cgr-dp_661	GCCUUUCAGAUCAUCUUCAGG	21	SupFam_168	N	NA	159	179	283	0	1	0	622	24	597	1	0	0
Cl_cgr-dp_662	GUUUGGUUUUGUUGGAAUGGA	21	SupFam_154	N	NA	183	177	195	0	2	1	558	39	517	2	0	0
Cl_cgr-dp_705	GUGCAAUGGAAGAAGUUGAUG	21	SupFam_94	N	NA	168	169	272	0	3	0	612	87	523	1	1	0
Cl_cgr-dp_750	GAGAAACGUUGGUGGUCAUUC	21	SupFam_155	N	NA	163	176	269	0	1	0	609	55	515	35	4	0
Cl_cgr-dp_752	GCGCAGACUUCACAUUUUAGU	21	SupFam_374	N	NA	224	190	193	0	0	0	607	3	522	4	78	0
Cl_cgr-dp_760	AUGGAUUCUAUUUCGACGCU	20	SupFam_149	N	NA	292	189	196	3	1	3	684	553	126	5	0	0
Cl_cgr-dp_763	GAGUCUCAUUCUUGUUCUGUGA	22	SupFam_493	N	NA	135	157	281	0	0	0	573	2	87	480	4	0
Cl_cgr-dp_773	AUGGACUGUGUCUUCUUCAUU	21	SupFam_899	N	NA	284	274	337	8	13	15	931	30	505	380	16	0
Cl_cgr-dp_775	UGAUUAUGUCUCCUGGUACU	20	SupFam_33	N	NA	293	251	279	1	4	3	831	514	105	212	0	0
Cl_cgr-dp_779	AAAGACAACACUCAUCAGGUU	21	SupFam_494	N	NA	238	235	381	4	5	3	866	97	513	244	12	0
Cl_cgr-dp_783	UUCAACCUCGUCAUCGGUCCAU	22	SupFam_495	N	NA	210	194	220	1	0	0	625	30	76	503	14	2
Cl_cgr-dp_784	UUCUGGUAGGGUCUGAAGUGAA	22	SupFam_156	N	NA	304	150	221	2	2	1	680	29	168	444	6	33
Cl_cgr-dp_788	UCAAGUUCUACACCAUAACCA	21	SupFam_496	N	NA	202	112	209	4	2	6	535	63	458	10	4	0
Cl_cgr-dp_804	GGAAACUUCUCUGCGGAAGC	20	SupFam_32	N	NA	187	184	352	0	1	0	724	515	173	36	0	0
Cl_cgr-dp_829	GUUCACCUCAAUUGUCUUAUU	21	SupFam_107	N	NA	172	187	143	0	1	0	503	10	470	22	1	0
Cl_cgr-dp_849	UUGCGAGGUGUAAAAUGGUA	20	SupFam_82	N	NA	229	231	225	1	2	5	693	680	11	2	0	0
Cl_cgr-dp_865	AAUCCGGAGUACUUCCAAGUA	21	SupFam_10	N	NA	161	137	203	3	1	0	505	73	425	3	4	0
Cl_cgr-dp_866	UCAACUUCUUUCAUUGCGCAU	21	SupFam_157	N	NA	145	127	210	3	6	3	494	29	461	4	0	0
Cl_cgr-dp_875	UAAUGCAGAGGAGUUUCACCAA	22	SupFam_497	N	NA	196	181	272	0	2	4	655	39	204	401	6	5
Cl_cgr-dp_902	UGAAAGAAAGUUUGAGCUCCA	21	SupFam_375	N	NA	324	229	278	1	0	2	834	71	420	332	11	0
Cl_cgr-dp_907	CGGGAAGUGAUUGUUGCUAUU	21	SupFam_158	N	NA	237	184	13	1	0	0	435	1	432	2	0	0
Cl_cgr-dp_911	AGUAGCAAGAUUACUUGGUAGU	22	SupFam_376	N	NA	97	147	265	0	0	0	509	6	27	470	6	0
Cl_cgr-dp_971	CUUUAAUUCUCAUUAUCUUUU	21	SupFam_377	N	NA	199	202	373	0	0	0	774	180	454	122	18	0
Cl_cgr-dp_986	CUACUGUCUUCUUUGUUCUACC	22	SupFam_378	N	NA	180	176	233	0	0	0	589	6	19	551	13	0
Cl_cgr-dp_991	GUUUGUUGUGUGAUCUUUCGAGAG	24	SupFam_41	N	NA	259	232	288	0	0	0	779	0	0	19	310	450
Cl_cgr-dp_1040	UCAAUGCGAUCCCUUUGAACA	21	SupFam_13	N	Y	125	134	188	7	15	6	475	41	406	23	5	0
Cl_cgr-dp_1042	UUUGACAGUACCAUAGCCCUG	21	SupFam_379	N	NA	115	137	154	1	3	2	412	6	398	7	1	0
Cl_cgr-dp_1048	CUCUAUCAAAAAUUCCAGAUA	21	SupFam_380	N	NA	136	126	243	0	0	2	507	66	433	8	0	0
Cl_cgr-dp_1080	CAACUUCUUCCUCAAUCCACCA	22	SupFam_498	N	NA	189	146	141	2	1	0	479	4	62	394	19	0
Cl_cgr-dp_1098	UUCCGCAAGUUGCUCCUAACC	21	SupFam_159	N	NA	225	153	226	0	1	1	606	95	508	2	1	0
Cl_cgr-dp_1114	AUGGGAGAUGCUUUCUGGUAAU	22	SupFam_95	N	NA	196	160	269	0	3	4	632	65	84	377	103	3
Cl_cgr-dp_1122	UUUGGUAUGUUGGUGAGGCAG	21	SupFam_381	N	NA	138	105	129	0	2	8	382	4	374	4	0	0
Cl_cgr-dp_1134	CCAUAUUACACCUCGCAACA	20	SupFam_176	N	NA	130	92	138	0	0	0	360	353	2	5	0	0
Cl_cgr-dp_1167	AUUCUUCCGAAAUGCAACACG	21	SupFam_382	N	NA	148	108	175	1	1	2	435	55	379	1	0	0
Cl_cgr-dp_1197	AAAAUCAUAAUUGCAACCAAUU	22	SupFam_499	N	NA	85	115	237	4	8	12	461	4	104	352	1	0
Cl_cgr-dp_1279	AACUGAGCGACCCAGAGAACG	21	SupFam_160	N	NA	183	87	161	1	0	0	432	21	399	8	4	0
Cl_cgr-dp_1320	UUGGGUGUGUGUUGGUUUGGA	21	SupFam_161	N	NA	136	116	211	0	1	1	465	40	310	76	39	0
Cl_cgr-dp_1326	UUUGCCUUUGAUACCACAUAU	21	SupFam_500	N	NA	184	136	229	1	2	2	554	45	431	78	0	0
Cl_cgr-dp_1335	UCACCUCGGCCUGCCAUUCUA	21	SupFam_4	N	NA	149	106	109	1	4	4	373	48	322	3	0	0
Cl_cgr-dp_1336	GUAAUGUGCUGUCAAAGUGUU	21	SupFam_216	N	NA	60	145	149	0	0	3	357	16	339	1	1	0
Cl_cgr-dp_1339	GCAGCUUGCUUCCCUACAUGA	21	SupFam_501	N	NA	159	150	258	0	0	0	567	210	321	35	1	0
Cl_cgr-dp_1380	UCGGGGUAAGUUGGUGAGACAA	22	SupFam_383	N	NA	152	113	178	1	1	2	447	8	61	293	70	15
Cl_cgr-dp_1446	AGGAAGAGUCGACCUGUGGGUC	22	SupFam_900	N	NA	315	371	28	9	16	1	740	11	284	441	4	0
Cl_cgr-dp_1472	UCUGCAUUGUUUUGAUGUCCC	21	SupFam_384	N	NA	88	153	194	2	0	4	441	1	431	7	2	0
Cl_cgr-dp_1476	AGAUGUGAGCUUGACAGGUAG	21	SupFam_385	N	NA	235	213	242	2	1	1	694	110	301	244	39	0
Cl_cgr-dp_1485	GAAAACAUAUUGUUACGCGUU	21	SupFam_15	N	Y	167	217	281	1	1	0	667	13	385	266	3	0
Cl_cgr-dp_1544	UGAGUUGAAGCUUGAUAUUUCU	22	SupFam_217	N	NA	120	131	169	0	1	0	421	4	9	309	99	0
Cl_cgr-dp_1559	UUCCUCUUCUUUGCAUCCCAAU	22	SupFam_502	N	NA	147	138	203	1	1	0	490	37	120	323	9	1
Cl_cgr-dp_1588	GUCAUUAAAUCUUCCCCCACG	21	SupFam_109	N	NA	111	69	136	0	0	2	318	4	313	0	1	0
Cl_cgr-dp_1598	CUUCUUCCUUCAUCUCUGAA	20	SupFam_218	N	NA	284	280	351	1	1	2	919	321	361	237	0	0
Cl_cgr-dp_1602	UUGAAUUCCCUCUCUCUCCAUU	22	SupFam_386	N	NA	94	86	108	0	2	1	291	0	8	280	3	0
Cl_cgr-dp_1624	CUCCUUGGUAGAGAUGCACCU	21	SupFam_503	N	NA	142	124	92	3	1	3	365	42	319	2	2	0
Cl_cgr-dp_1655	CAACUGCCAACCACUUCUCAA	21	SupFam_504	N	NA	122	91	93	2	0	4	312	35	273	4	0	0
Cl_cgr-dp_1693	CCGACAGUCGGCAAUGGAGCA	21	SupFam_901	N	NA	156	174	16	7	6	0	359	10	268	69	12	0
Cl_cgr-dp_1790	CCGGGAUAUAGGGCACCUGUC	21	SupFam_83	N	NA	115	270	51	0	0	1	437	54	376	7	0	0
Cl_cgr-dp_1890	GAAUGACAGGCAGGGGUGAGC	21	SupFam_23	N	NA	153	76	66	0	0	0	295	0	287	3	5	0
Cl_cgr-dp_1909	UGUUGUUUCAGUCAAUUCAUC	21	SupFam_219	N	NA	69	58	138	1	1	0	267	2	265	0	0	0
Cl_cgr-dp_1925	UUGAAGGGGUUGAUGACAUAUC	22	SupFam_387	N	NA	168	137	253	0	1	1	560	4	59	316	168	13
Cl_cgr-dp_1927	UUAUCGACGGUGUGUGGGAUG	21	SupFam_21	N	Y	129	32	81	0	1	1	244	3	239	2	0	0
Cl_cgr-dp_1937	UUGCGUUGUAGUUCCUGUCAA	21	SupFam_162	N	NA	120	65	86	1	1	3	276	26	240	6	4	0
Cl_cgr-dp_1941	CCCCUGUGAAUGAUAUGUUUC	21	SupFam_505	N	NA	116	72	66	0	0	0	254	8	239	6	1	0
Cl_cgr-dp_1943	UUAGGAUACUAAGAUGCUUUC	21	SupFam_506	N	NA	105	83	81	0	1	0	270	31	236	3	0	0
Cl_cgr-dp_1973	UGGGAAGUAUGAAAUGGGAUCU	22	SupFam_231	N	NA	195	133	153	2	1	2	486	8	190	282	6	0
Cl_cgr-dp_1997	CUUUCAAAGUAUUGGGUUGUU	21	SupFam_388	N	NA	103	87	100	0	0	0	290	38	246	3	3	0
Cl_cgr-dp_2014	GGACUGAAGGGAGCUCCCUCC	21	SupFam_902	N	NA	90	85	119	18	11	13	336	9	317	8	2	0
Cl_cgr-dp_2026	GAUUCAAAUUAAGGCCGAGACU	22	SupFam_507	N	NA	109	98	115	1	1	4	328	7	13	277	17	14
Cl_cgr-dp_2041	CGCGUAUCAAUAUGUUGUCCCC	22	SupFam_9	N	Y	135	168	161	1	0	0	465	3	72	305	81	4
Cl_cgr-dp_2117	UUCUUUCAAACGUGUGACCUAUU	23	SupFam_14	N	NA	207	142	204	2	0	1	556	0	2	187	353	14
Cl_cgr-dp_2170	UAGGUUGAAAGUGACAAUGAG	21	SupFam_170	N	NA	107	87	126	5	4	6	335	7	225	67	36	0
Cl_cgr-dp_2228	GGAAUUAAGAGGAAAGAUGGG	21	SupFam_389	N	NA	92	79	112	1	0	0	284	33	241	9	1	0
Cl_cgr-dp_2230	GUUUCCAAUCCACCCCACACG	21	SupFam_903	N	NA	103	62	70	0	0	0	235	0	235	0	0	0
Cl_cgr-dp_2235	AAAUAUCAGCUUCAUUUCAAG	21	SupFam_220	N	NA	53	60	94	1	0	2	210	0	207	3	0	0
Cl_cgr-dp_2252	UGUAUCAUCUCUCUUCCAUGU	21	SupFam_221	N	NA	96	117	161	2	1	0	377	4	244	128	1	0
Cl_cgr-dp_2264	CUUCGGUAGAACAAAUCUUUCAUU	24	SupFam_84	N	NA	74	83	94	0	0	0	251	0	0	5	7	239
Cl_cgr-dp_2268	GACGUUGGGAUUGAAGUGGCG	21	SupFam_19	N	Y	95	83	86	0	0	1	265	12	251	2	0	0
Cl_cgr-dp_2280	CUUGGAUGUACUCCUGAUCA	20	SupFam_163	N	NA	139	122	231	1	0	2	495	239	166	90	0	0
Cl_cgr-dp_2315	GAGUAAUCCUUCCAACAAUUCC	22	SupFam_390	N	NA	93	124	245	1	1	0	464	15	103	260	70	16
Cl_cgr-dp_2357	UUCUUUCAAAUGUGUGACCUAA	22	SupFam_14	N	NA	174	137	137	0	1	4	453	1	58	385	6	3
Cl_cgr-dp_2370	CAGUGUCUUUCAUCUUGUGU	20	SupFam_391	N	NA	81	113	109	1	1	4	309	225	81	3	0	0
Cl_cgr-dp_2371	CAAUUGCUUCCUUCAUUCAAGC	22	SupFam_392	N	NA	78	65	105	0	0	4	252	0	5	246	1	0
Cl_cgr-dp_2428	CUCUUCAAAUUUUUCAUGACCC	22	SupFam_393	N	NA	111	106	151	4	2	1	375	3	62	307	3	0
Cl_cgr-dp_2443	UUAUGUCUCCUGGUACUAGCC	21	SupFam_33	N	NA	98	73	122	0	1	3	297	6	291	0	0	0
Cl_cgr-dp_2509	AUUCCGACCAUCGACCUCGAG	21	SupFam_904	N	NA	159	108	170	18	17	18	490	17	348	124	1	0
Cl_cgr-dp_2635	GUCCCGACCCCAUACCAAGCGA	22	SupFam_164	N	NA	126	58	136	0	0	0	320	53	67	188	9	3
Cl_cgr-dp_2670	AAGGAGAACUCAUUUCGUUCA	21	SupFam_394	N	NA	60	90	72	0	0	1	223	24	186	12	1	0
Cl_cgr-dp_2715	UUCUUUCACAGUCUUGAUGUU	21	SupFam_395	N	NA	64	61	86	0	0	0	211	2	208	1	0	0
Cl_cgr-dp_2724	CGAAUCAUCUCACACCCACUU	21	SupFam_111	N	NA	105	102	111	0	0	0	318	120	195	3	0	0
Cl_cgr-dp_2739	UUGACCUCCAAUCGUUUCUCAA	22	SupFam_96	N	NA	73	60	118	0	1	2	254	31	32	182	9	0
Cl_cgr-dp_2756	UAUCUGAAGAUGAUCUGAAAUGCU	24	SupFam_29	N	NA	116	169	188	4	0	1	478	0	0	9	44	425
Cl_cgr-dp_2765	UUGCAUUCCAAUUCUCGUCUA	21	SupFam_905	N	NA	64	58	85	3	2	4	216	24	183	9	0	0
Cl_cgr-dp_2779	UCUCGAUGGUGGUCUGGAUUGAA	23	SupFam_222	N	NA	72	46	80	0	1	0	199	0	9	12	174	4
Cl_cgr-dp_2825	UCUCGGCCAUAAUUUGAAUCAA	22	SupFam_508	N	NA	91	84	100	1	2	4	282	27	53	182	14	6
Cl_cgr-dp_2888	GGACCGAAGAAGACGUUGAAAA	22	SupFam_509	N	NA	147	107	119	0	1	0	374	20	168	173	3	10
Cl_cgr-dp_2967	GGCAAAUAAUGCUACUACCGUAAU	24	SupFam_510	N	NA	60	69	51	0	1	0	181	0	0	1	5	175
Cl_cgr-dp_2989	GUCAAAGAAUCACUGUGGAAUC	22	SupFam_906	N	NA	117	75	121	0	0	0	313	1	49	248	15	0
Cl_cgr-dp_3056	UGAUGCAUUCACCCUCGUCUC	21	SupFam_97	N	NA	132	156	225	0	3	0	516	142	346	18	10	0
Cl_cgr-dp_3062	AUGGUCGGAAUGAUAGUGAUG	21	SupFam_907	N	NA	73	73	98	14	9	10	277	2	192	74	9	0
Cl_cgr-dp_3260	GGUCUACGAGAAGAAAUGAAGA	22	SupFam_908	N	NA	86	50	47	0	0	1	184	0	15	160	3	6
Cl_cgr-dp_3304	UUUUGCGACUUUGUUUUCCAA	21	SupFam_396	N	NA	27	32	102	0	0	0	161	10	150	1	0	0
Cl_cgr-dp_3339	AUAGAUGUAUGUGCACAAUUG	21	SupFam_909	N	NA	32	37	80	4	7	6	166	2	158	6	0	0
Cl_cgr-dp_3381	GUGGUCUUUGUGAUGGAUGUU	21	SupFam_397	N	NA	92	47	77	0	0	0	216	23	187	6	0	0
Cl_cgr-dp_3512	AACGAAAUGAGUUCUUCUUCA	21	SupFam_368	N	NA	51	52	65	1	0	0	169	6	155	6	2	0
Cl_cgr-dp_3547	CACCUUGACAGCACAUUACCC	21	SupFam_511	N	NA	78	78	80	1	1	4	242	10	226	5	1	0
Cl_cgr-dp_3606	GAGUGGUUGAAACUACACAUG	21	SupFam_98	N	NA	19	40	94	0	0	0	153	1	152	0	0	0
Cl_cgr-dp_3760	UCGGUGAAAAAGCUAAGAUGU	21	SupFam_90	N	NA	121	139	160	1	2	0	423	37	240	129	17	0
Cl_cgr-dp_3780	UUCUGCUGGUUGUGUAGCUUU	21	SupFam_99	N	NA	37	41	70	1	0	0	149	1	145	2	1	0
Cl_cgr-dp_3792	AGAUGUGAGCUUGACAGGUAGCAA	24	SupFam_385	N	NA	46	50	43	0	0	0	139	0	0	1	3	135
Cl_cgr-dp_3991	CUCAUAACCGCAAAUCUCAUU	21	SupFam_512	N	NA	62	48	34	0	0	0	144	2	141	1	0	0
Cl_cgr-dp_4026	GAUCAUGCCGGCAUCUUCACC	21	SupFam_910	N	NA	40	51	49	7	7	6	160	2	158	0	0	0
Cl_cgr-dp_4249	GUUCUAGAGACAACAACAAGUU	22	SupFam_398	N	NA	39	60	52	0	0	0	151	2	8	130	11	0
Cl_cgr-dp_4298	UGAGUUCGGGUUGAGUUUCCAAUU	24	SupFam_150	N	NA	45	40	64	0	1	2	152	0	0	0	3	149
Cl_cgr-dp_4302	AAUACGGGUGGAAGCAGACAUA	22	SupFam_85	N	NA	119	86	92	2	2	2	303	3	24	125	10	141
Cl_cgr-dp_4455	UACAUGAAAGUAUCUCCCAUCG	22	SupFam_165	N	NA	54	44	70	0	0	0	168	6	28	134	0	0
Cl_cgr-dp_4482	GUCUACCCAGGACUACCUCUU	21	SupFam_911	N	NA	120	146	9	5	5	0	285	22	206	56	1	0
Cl_cgr-dp_4493	CAGUAGUUCUCUCUGCCACU	20	SupFam_151	N	NA	58	50	34	0	0	0	142	128	11	3	0	0
Cl_cgr-dp_4499	UUGAUCUAGAUUCCACAAGGAA	22	SupFam_399	N	NA	42	55	84	0	1	3	185	8	25	127	21	4
Cl_cgr-dp_4522	UGGGGGAGCAAUGAAGAUAGA	21	SupFam_912	N	NA	69	31	48	8	2	3	161	3	122	36	0	0
Cl_cgr-dp_4554	CCAUCUUAAACACAUGCUCA	20	SupFam_91	N	NA	96	79	78	0	1	1	255	134	111	10	0	0
Cl_cgr-dp_4629	CUAAGUGCUUUCACGAGAGC	20	SupFam_513	N	NA	47	55	93	0	0	0	195	147	46	2	0	0
Cl_cgr-dp_4707	GCGUUGAUAACAUGUCUUAGU	21	SupFam_514	N	NA	23	42	75	0	3	1	144	4	128	11	1	0
Cl_cgr-dp_4743	AUCCUAUUUCAUACUUCCCAUG	22	SupFam_400	N	NA	61	46	74	0	1	0	182	2	56	124	0	0
Cl_cgr-dp_4806	AAAAGGAUUUGGAACUACAAA	21	SupFam_515	N	NA	58	41	70	2	3	3	177	11	142	24	0	0
Cl_cgr-dp_4827	GCAAGAUGAAAGGCACUGCU	20	SupFam_401	N	NA	42	59	66	0	2	1	170	150	14	6	0	0
Cl_cgr-dp_4984	CUUGAUGAUUGUUGUCUUGUC	21	SupFam_223	N	NA	41	47	59	0	1	7	155	15	134	0	6	0
Cl_cgr-dp_5090	CACACAUGAGUUGGAGAAGAA	21	SupFam_913	N	NA	56	31	44	3	3	2	139	11	113	13	2	0
Cl_cgr-dp_5130	AAGCAUCGUAGUAUCCUGAUA	21	SupFam_516	N	NA	50	30	49	0	0	0	129	18	110	1	0	0
Cl_cgr-dp_5211	CAUCUUUUCUUUUAAUUCCAC	21	SupFam_224	N	NA	46	63	76	1	1	2	189	5	176	7	1	0
Cl_cgr-dp_5239	AACUAAGUAUUGAGACUAUAGGUU	24	SupFam_517	N	NA	56	56	90	2	1	1	206	0	0	2	4	200
Cl_cgr-dp_5271	UUGCCCUUGAUAACACAUUGCCAC	24	SupFam_402	N	NA	41	38	49	0	0	1	129	0	0	3	2	124
Cl_cgr-dp_5433	CAUCGACGUUCUCCGCUUGAU	21	SupFam_518	N	NA	38	49	78	0	0	0	165	24	126	14	1	0
Cl_cgr-dp_5436	UGAGUUGGAGAAGAACGACAGG	22	SupFam_519	N	NA	120	89	134	11	20	12	386	6	17	160	96	107
Cl_cgr-dp_5536	UUCACGGGGACGAGGCAAAGC	21	SupFam_914	N	NA	65	41	62	7	5	9	189	3	143	42	1	0
Cl_cgr-dp_5620	AGUAUCAUCUUUUUUCUCCAA	21	SupFam_520	N	NA	25	24	61	1	0	1	112	3	101	7	1	0
Cl_cgr-dp_5622	UUCACUUCUUUUAUUGCACAC	21	SupFam_157	N	NA	44	41	55	0	2	0	142	11	131	0	0	0
Cl_cgr-dp_5648	GCGGCAAUUGUUACCACUAUC	21	SupFam_521	N	NA	152	104	55	1	0	0	312	13	195	100	4	0
Cl_cgr-dp_5741	GGCUUUGUGGUUAAGGGCACU	21	SupFam_403	N	NA	46	33	41	0	0	0	120	1	112	7	0	0
Cl_cgr-dp_5797	UUGGAUGAAGGAAGGAGUUGAA	22	SupFam_404	N	NA	42	32	55	0	1	2	132	1	15	97	19	0
Cl_cgr-dp_5853	UAUUUUGAGUCUUUACAACCAU	22	SupFam_522	N	NA	26	41	55	1	0	1	124	3	8	108	5	0
Cl_cgr-dp_6002	UGAUCUCACCAUCGGGUUCAAU	22	SupFam_915	N	NA	30	32	80	0	0	3	145	2	7	134	2	0
Cl_cgr-dp_6021	CAUGUGCCAAGCUUUUCCAUG	21	SupFam_2	N	Y	35	30	49	3	3	5	125	16	100	8	1	0
Cl_cgr-dp_6046	GGUGGGAACUACAGCGUAAUU	21	SupFam_166	N	NA	40	39	30	0	0	0	109	9	99	1	0	0
Cl_cgr-dp_6089	AGUUGGAAUGACCAUGAAAUAC	22	SupFam_523	N	NA	42	64	87	0	0	0	193	12	56	105	7	13
Cl_cgr-dp_6143	UUUCCAGGAGAGAAGUUUCCUA	22	SupFam_44	N	NA	19	41	75	2	0	0	137	16	23	98	0	0
Cl_cgr-dp_6418	UUCUGCUUCUGCUUGUUCUCUU	22	SupFam_524	N	NA	69	55	39	3	5	8	179	2	56	107	14	0
Cl_cgr-dp_6556	UACCAUUAGUUGGGUAGCUAU	21	SupFam_916	N	NA	25	21	50	0	0	1	97	1	95	1	0	0
Cl_cgr-dp_6614	UGAUAAUGAAGUUGACAUGAAU	22	SupFam_438	N	NA	29	30	43	0	0	0	102	2	0	96	4	0
Cl_cgr-dp_6659	AAUGAGUACAAAGGCUUGAGA	21	SupFam_405	N	NA	31	16	49	0	0	0	96	3	88	3	2	0
Cl_cgr-dp_6675	AAGAGGAGGGUGAAUGUAUCUG	22	SupFam_56	N	NA	75	74	66	0	3	2	220	14	52	93	19	42
Cl_cgr-dp_7139	AUACCACGGUGAUCUUUAACCCUC	24	SupFam_115	N	NA	62	56	49	0	0	0	167	0	0	7	21	139
Cl_cgr-dp_7183	UUGGAGGGGUGAAGUUCCUAA	21	SupFam_225	N	N	27	33	54	1	1	2	118	7	81	29	1	0
Cl_cgr-dp_7292	UUAGAGAUGAUGGGUAAAUGAU	22	SupFam_226	N	NA	34	32	31	0	0	1	98	0	4	89	5	0
Cl_cgr-dp_7437	AUAUUGAUUUCUUGCUUCCAC	21	SupFam_422	N	NA	25	36	65	3	0	1	130	3	108	18	1	0
Cl_cgr-dp_7465	GUUUCUGAUUCUAUUGAACCC	21	SupFam_100	N	NA	60	68	66	10	8	7	219	61	155	3	0	0
Cl_cgr-dp_7568	UUCUCGGGGUCGUUCAGGCC	20	SupFam_227	N	NA	44	64	73	0	1	1	183	130	53	0	0	0
Cl_cgr-dp_7650	CAUUGUUGAAACAUGCUUCUA	21	SupFam_525	N	NA	28	30	38	0	0	1	97	16	79	2	0	0
Cl_cgr-dp_7963	GAACCUUCAUUCCCUCAUGAC	21	SupFam_526	N	NA	33	28	39	0	0	0	100	11	85	3	1	0
Cl_cgr-dp_7966	UCAGCCUCUUCACCUAGACC	20	SupFam_209	N	NA	73	72	75	8	13	10	251	170	76	5	0	0
Cl_cgr-dp_8018	UGCAGAGAGAACUACUAGUCCG	22	SupFam_58	N	NA	47	22	30	0	0	0	99	9	3	86	1	0
Cl_cgr-dp_8053	ACUACUUGUUUCUGUUAGAAAU	22	SupFam_228	N	NA	43	55	47	0	0	0	145	1	36	89	18	1
Cl_cgr-dp_8122	GAAUGACAGGCAGGGGUGAGCGUG	24	SupFam_23	N	NA	38	23	22	0	0	0	83	0	0	0	0	83
Cl_cgr-dp_8141	GGCAUCAAAACCAUGCAGACA	21	SupFam_917	N	NA	12	31	39	0	0	0	82	2	78	2	0	0
Cl_cgr-dp_8207	CUUUUACCGAUCAUCUCUAAUG	22	SupFam_229	N	NA	32	22	49	0	0	0	103	1	10	89	3	0
Cl_cgr-dp_8359	GCUUAUAAAAGAGAAUACGAA	21	SupFam_527	N	NA	18	30	52	0	0	0	100	10	74	16	0	0
Cl_cgr-dp_8412	AUGUCUGUUUCCACCCGCAUUCUU	24	SupFam_87	N	NA	45	47	61	0	0	2	155	0	0	16	23	116
Cl_cgr-dp_8447	GUGUUUUCCAAGACGUGGAGCGGC	24	SupFam_918	N	NA	45	52	46	6	4	2	155	0	0	4	22	129
Cl_cgr-dp_8457	UGUUUGACCUCCAAUCGUUUCUC	23	SupFam_96	N	NA	45	26	34	0	0	0	105	0	2	23	79	1
Cl_cgr-dp_8594	UCCUCUCGAAUGUUUGCCCUGA	22	SupFam_14	N	NA	69	33	52	0	0	0	154	3	75	73	2	1
Cl_cgr-dp_8691	UCACUUCUGCCUGCCAUUCUG	21	SupFam_4	N	NA	25	31	28	0	0	0	84	1	71	12	0	0
Cl_cgr-dp_8765	UAGUGGUAACAAUUGCUGCAC	21	SupFam_919	N	NA	50	52	34	0	0	0	136	2	85	41	8	0
Cl_cgr-dp_8781	UAGCCAUGAAUUCAUAUAUGCCA	23	SupFam_528	N	NA	19	28	42	2	0	3	94	0	0	19	73	2
Cl_cgr-dp_8852	CGCAAUGGAGUCGAUAACCU	20	SupFam_210	N	NA	33	30	34	0	0	0	97	95	1	1	0	0
Cl_cgr-dp_8875	UCGAGGUCGAUGGUCGGAAUG	21	SupFam_529	N	NA	63	36	61	6	8	4	178	0	96	79	3	0
Cl_cgr-dp_9008	GCAUAUGAAUUCAUGGCUAAA	21	SupFam_530	N	NA	28	21	33	0	0	2	84	10	69	3	2	0
Cl_cgr-dp_9128	CAUCAAGACUGUGGAAGAAAA	21	SupFam_531	N	NA	30	17	34	0	0	3	84	4	69	10	1	0
Cl_cgr-dp_9140	GAGUGCGAAGGAGAGAAACGG	21	SupFam_483	N	NA	46	26	37	0	0	0	109	4	69	35	1	0
Cl_cgr-dp_9312	CAUCAUAGCUUUUUCAUCGAA	21	SupFam_45	N	Y	28	33	47	0	1	0	109	14	73	21	1	0
Cl_cgr-dp_9450	AGACAAUUGAGGUGAACCACA	21	SupFam_253	N	NA	42	15	23	3	2	1	86	6	73	7	0	0
Cl_cgr-dp_9515	CCUUUGGAGUCUAGAUCAAG	20	SupFam_406	N	NA	46	42	63	3	2	1	157	71	61	25	0	0
Cl_cgr-dp_9546	UUAAGCCUUUCAGAUCAUCUU	21	SupFam_168	N	NA	25	32	30	0	0	1	88	1	84	3	0	0
Cl_cgr-dp_9595	GUGGCUAUAUUAAAUAUGAAU	21	SupFam_920	N	NA	23	19	29	0	0	0	71	0	68	3	0	0
Cl_cgr-dp_9654	CAACUGGUACAGAAAAUACUU	21	SupFam_532	N	NA	17	21	40	1	0	3	82	4	78	0	0	0
Cl_cgr-dp_9766	UAGCAACAAUCUCUUCCUCAUU	22	SupFam_533	N	NA	32	43	6	0	0	0	81	1	4	73	3	0
Cl_cgr-dp_9788	CUUCUCCAACUCAUGUGUGGC	21	SupFam_534	N	NA	38	28	33	1	2	2	104	1	88	14	1	0
Cl_cgr-dp_9817	GGUCUUGAUUGAUUGCAAAAUG	22	SupFam_535	N	NA	20	34	63	0	0	0	117	1	0	73	17	26
Cl_cgr-dp_9864	CAUUCCAACAAAUCCAAACCA	21	SupFam_167	N	NA	25	26	29	0	1	0	81	12	69	0	0	0
Cl_cgr-dp_9927	GGGGAGGAAAGACGGGACAUG	21	SupFam_440	N	NA	35	26	21	0	0	0	82	3	77	2	0	0
Cl_cgr-dp_10148	CGCAUCUCGGUCUACCCAGGA	21	SupFam_921	N	NA	68	59	11	4	1	1	144	18	89	33	4	0
Cl_cgr-dp_10319	UUUCGGUGAAAAAGCUAAGAU	21	SupFam_90	N	NA	24	26	57	1	0	0	108	30	68	9	1	0
Cl_cgr-dp_10336	AAGAUGAUCUGAAAUGCUUAA	21	SupFam_29	N	NA	31	28	43	0	0	0	102	11	79	12	0	0
Cl_cgr-dp_10582	UUCAUUGUCACGUUCAACCAU	21	SupFam_175	N	NA	30	33	34	0	0	0	97	6	70	21	0	0
Cl_cgr-dp_10674	CUUCUUCCCAUACUUUCUCUG	21	SupFam_3	N	Y	17	30	24	0	0	0	71	4	67	0	0	0
Cl_cgr-dp_10705	AGUUGGAGAAGAACGACAGGC	21	SupFam_519	N	NA	26	30	45	3	5	1	110	3	84	23	0	0
Cl_cgr-dp_10919	UCUGGAAUUUUUGGUUUUUU	20	SupFam_536	N	NA	58	37	60	2	0	2	159	97	50	12	0	0
Cl_cgr-dp_10939	CUAGUAUCAGGAGACUUAAUC	21	SupFam_89	N	NA	19	30	46	0	0	0	95	9	80	6	0	0
Cl_cgr-dp_10978	AGAAGAAGGCAUCACUAUCAUU	22	SupFam_922	N	NA	40	31	39	2	1	3	116	1	36	77	1	1
Cl_cgr-dp_11062	GUGAUGUGCUCUCAAAGUGUA	21	SupFam_216	N	NA	27	23	39	0	0	2	91	6	60	25	0	0
Cl_cgr-dp_11279	AGGGCCUUUGGGCUUGAACUUCA	23	SupFam_537	N	NA	34	42	47	2	3	3	131	0	1	3	93	34
Cl_cgr-dp_11340	GAUGUUAUUCCGUCCCGUACA	21	SupFam_538	N	NA	24	29	29	0	0	0	82	11	62	8	1	0
Cl_cgr-dp_11344	AAGGACUUAAUAACUCAAAAU	21	SupFam_923	N	NA	28	14	34	0	0	0	76	2	61	13	0	0
Cl_cgr-dp_11383	GGAAUAUGAUGAAUAAGGAGU	21	SupFam_407	N	NA	27	36	26	0	0	0	89	1	69	17	2	0
Cl_cgr-dp_11672	UGAUCCGGAAUACUUCCAAAU	21	SupFam_10	N	NA	19	34	51	0	0	0	104	12	89	2	1	0
Cl_cgr-dp_11752	AAUUCGUGCAAGGUUUGGAAGAAG	24	SupFam_473	N	NA	12	22	40	0	0	1	75	0	0	1	2	72
Cl_cgr-dp_11762	UUGUAUUCUUCGGUGCCACAUU	22	SupFam_213	N	NA	15	25	17	0	0	0	57	0	0	56	1	0
Cl_cgr-dp_11794	GGCGAUGCAGCUCUGAACAUC	21	SupFam_539	N	NA	28	20	17	0	0	0	65	4	60	1	0	0
Cl_cgr-dp_11841	CUCCAUUGCCGACUGUCGGUA	21	SupFam_924	N	NA	41	31	5	1	0	0	78	9	55	14	0	0
Cl_cgr-dp_11894	UUUGCAGCUUGCUUCCCUACA	21	SupFam_925	N	NA	18	27	14	1	2	0	62	4	58	0	0	0
Cl_cgr-dp_12024	UUGCAGAGAGAACUACUAGUC	21	SupFam_58	N	NA	42	38	27	1	1	2	111	13	95	3	0	0
Cl_cgr-dp_12140	CGACAGGCAAAGCCAACUCAA	21	SupFam_926	N	NA	46	24	42	2	2	0	116	5	62	47	2	0
Cl_cgr-dp_12168	GAGUGCACUGUAGCAUGAUCCUAC	24	SupFam_927	N	NA	13	29	27	1	2	1	73	0	0	2	1	70
Cl_cgr-dp_12207	UCACAACGGAGGUUGUCUUCUC	22	SupFam_136	N	N	11	28	28	0	0	0	67	0	5	59	2	1
Cl_cgr-dp_12216	CCUCGUGAGGCUUACAGCGCG	21	SupFam_928	N	NA	40	62	4	2	3	0	111	6	77	27	1	0
Cl_cgr-dp_12274	GACGGUUGAGGUGAACCAAGU	21	SupFam_34	N	NA	32	53	61	0	0	0	146	2	90	28	26	0
Cl_cgr-dp_12279	UUCGGUAGAAUCAGAAGCCCCGCU	24	SupFam_57	N	NA	61	25	49	0	0	1	136	0	0	37	29	70
Cl_cgr-dp_12380	UUAGCAUGGAGCAGAGAUGAU	21	SupFam_540	N	NA	30	25	26	0	2	0	83	1	78	4	0	0
Cl_cgr-dp_12382	UUUCAUGGUCAUUCCAACCUC	21	SupFam_541	N	NA	21	41	54	0	1	3	120	4	93	22	1	0
Cl_cgr-dp_12388	GAGAACUAGUUGAGGCAGAAAU	22	SupFam_542	N	NA	63	38	41	0	0	0	142	2	7	73	58	2
Cl_cgr-dp_12432	AAGACAUGAGUUGACUGGCG	20	SupFam_408	N	NA	27	7	33	0	0	0	67	66	1	0	0	0
Cl_cgr-dp_12911	UGUGAUUCCUACUCUUGCCGC	21	SupFam_50	N	Y	41	47	18	0	0	0	106	7	88	9	2	0
Cl_cgr-dp_13026	UAUAUUGAUAAGAACAUCUAAA	22	SupFam_409	N	NA	23	15	31	0	0	0	69	7	11	47	1	3
Cl_cgr-dp_13200	UUGUAGUUGCAAAUCCUUUUUA	22	SupFam_543	N	NA	20	20	46	1	1	4	92	13	24	54	1	0
Cl_cgr-dp_13283	UUCUUUCAAACGUGUGAUCUAAA	23	SupFam_14	N	NA	41	32	36	1	1	0	111	0	2	14	53	42
Cl_cgr-dp_13295	UGGAAAAAUCAGCUCUUUUU	20	SupFam_30	N	NA	68	53	67	0	0	4	192	92	63	37	0	0
Cl_cgr-dp_13597	CGACCGCGUUGAUAACAUGUC	21	SupFam_929	N	NA	15	15	25	0	0	1	56	1	54	1	0	0
Cl_cgr-dp_13609	UGUUGCAUUUCGGAAGGAUG	20	SupFam_930	N	NA	27	21	36	0	0	1	85	58	27	0	0	0
Cl_cgr-dp_13611	AUAAAUCUUCGGGAUCAAGUCGGC	24	SupFam_143	N	NA	34	21	32	0	0	0	87	0	0	0	6	81
Cl_cgr-dp_13672	UUUUGCAAGAAUUCAGACCAC	21	SupFam_101	N	NA	32	22	43	0	0	0	97	2	52	39	4	0
Cl_cgr-dp_13684	UGGUUUCUGAUUCUAUUGAAC	21	SupFam_100	N	NA	38	29	35	0	0	0	102	19	61	22	0	0
Cl_cgr-dp_13768	AGUUAAAAGAUUGAAUUCAAUAUA	24	SupFam_410	N	NA	19	22	20	1	0	0	62	0	0	4	9	49
Cl_cgr-dp_13810	GGCGGAGGAGAGCUUUGGUGA	21	SupFam_544	N	NA	35	23	36	1	0	1	96	2	87	6	1	0
Cl_cgr-dp_14496	AUUGGACCAACUCACUAUCAUGUG	24	SupFam_931	N	NA	15	14	27	1	1	1	59	0	0	0	3	56
Cl_cgr-dp_14631	UGUGAAGGUAUAGAAGUCCUU	21	SupFam_49	N	Y	15	22	29	0	0	0	66	12	53	1	0	0
Cl_cgr-dp_14681	GCAACUAACUUAGAAUCCACU	21	SupFam_411	N	NA	30	20	11	0	0	0	61	0	52	8	1	0
Cl_cgr-dp_14787	GAAGCAUGUAGAACCUACAUA	21	SupFam_545	N	NA	32	11	32	0	0	0	75	1	74	0	0	0
Cl_cgr-dp_14926	CGACGAUGACGACGACGACGGC	22	SupFam_932	N	NA	35	33	24	6	1	1	100	1	3	96	0	0
Cl_cgr-dp_15075	GGGAAACGUUAUCAUUGAUCU	21	SupFam_546	N	NA	26	21	21	0	0	0	68	8	60	0	0	0
Cl_cgr-dp_15266	GUAUUUUCUGUAUCAGUUAUC	21	SupFam_547	N	NA	14	14	22	0	0	0	50	0	45	5	0	0
Cl_cgr-dp_15437	GAGGUCGAUGGUCGGAAUGAU	21	SupFam_529	N	NA	36	23	26	0	0	0	85	3	54	27	1	0
Cl_cgr-dp_15573	AAGUGUCAUCAACGCCUUCAAGU	23	SupFam_933	N	NA	14	17	29	0	0	0	60	0	1	11	46	2
Cl_cgr-dp_15595	UCCAUUUCUUCUGGUAAACCAU	22	SupFam_548	N	NA	12	14	26	0	0	0	52	0	2	48	2	0
Cl_cgr-dp_15679	CUAUGAGAUAAGUUCAACGUG	21	SupFam_934	N	NA	22	27	1	0	0	0	50	0	50	0	0	0
Cl_cgr-dp_16647	GAAACGUUGGUGGUCAUUCAUA	22	SupFam_155	N	NA	30	23	36	0	0	0	89	0	29	48	2	10
Cl_cgr-dp_16949	UUGUGGGGGAGCAAUGAAGAU	21	SupFam_549	N	NA	43	20	41	1	3	2	110	0	77	29	4	0
Cl_cgr-dp_17301	UAGGAAUGAUGAAGGAGUGGCGU	23	SupFam_12	N	Y	16	13	20	0	0	0	49	0	0	1	41	7
Cl_cgr-dp_18092	UUGCUGCAUGUCAAGCUCAU	20	SupFam_79	N	NA	25	21	17	1	0	1	65	61	4	0	0	0
Cl_cgr-dp_18120	UAUGGGAGAUGCUUUCUGGUA	21	SupFam_95	N	NA	27	26	30	0	0	0	83	36	43	4	0	0
Cl_cgr-dp_18261	CUUCUUCUUGGGCGGUGGCGG	21	SupFam_935	N	NA	24	18	27	1	3	0	73	1	66	6	0	0
Cl_cgr-dp_18413	GAUGAUUGUUGUCUUGUCUUU	21	SupFam_936	N	NA	18	19	13	0	0	0	50	5	44	1	0	0
Cl_cgr-dp_18605	UUCUUGUUCAUCAUAUUCCUA	21	SupFam_137	N	Y	14	16	18	0	0	0	48	4	41	2	1	0
Cl_cgr-dp_18614	GGGUACGUAUCCGAGCUUCUCU	22	SupFam_937	N	NA	39	63	4	1	3	1	111	2	32	76	1	0
Cl_cgr-dp_18717	UUGGACUGAAGGGUUUCCUUC	21	SupFam_938	N	NA	25	23	2	0	0	0	50	1	43	6	0	0
Cl_cgr-dp_18834	AUAUCUGAAGAUUAUCUGAAAGGC	24	SupFam_29	N	NA	14	38	47	0	0	0	99	0	0	0	10	89
Cl_cgr-dp_18949	CGCGUAACAAUAUGUUUUCCU	21	SupFam_9	N	Y	8	22	30	0	0	0	60	2	57	1	0	0
Cl_cgr-dp_19192	CAGGUCAACAAUCGUCAAGUU	21	SupFam_939	N	NA	19	18	12	0	0	0	49	4	43	1	1	0
Cl_cgr-dp_19379	AUGGAAAAAUCAGCUCUAGG	20	SupFam_30	N	NA	43	46	46	0	0	0	135	62	50	23	0	0
Cl_cgr-dp_19602	GGAUUACACAACCUUCACACA	21	SupFam_550	N	NA	11	16	27	0	0	0	54	8	45	1	0	0
Cl_cgr-dp_19835	CCCGUCAACUUAUGUCUUGU	20	SupFam_148	N	NA	28	5	28	0	0	0	61	43	12	6	0	0
Cl_cgr-dp_19955	UUCUACCAGAAACAAGCAGUA	21	SupFam_551	N	NA	35	15	30	0	0	1	81	3	57	21	0	0
Cl_cgr-dp_20080	GAGGUAGUCCUGGGUAGACCG	21	SupFam_940	N	NA	39	53	5	0	0	0	97	19	64	14	0	0
Cl_cgr-dp_20555	CUUGGAGCUGAUUUUUCCAAA	21	SupFam_552	N	NA	12	18	21	0	0	0	51	3	44	3	1	0
Cl_cgr-dp_20619	AAGCCUUUCAGAUCAUCUUCA	21	SupFam_168	N	NA	10	14	20	0	0	1	45	6	35	4	0	0
Cl_cgr-dp_20941	GAGACAUCAGUUGAUUGGUG	20	SupFam_408	N	NA	10	10	14	0	0	0	34	34	0	0	0	0
Cl_cgr-dp_21060	CGGCAUGAACCCAAAGAUAU	20	SupFam_348	N	NA	25	40	30	0	1	0	96	80	10	6	0	0
Cl_cgr-dp_21099	UGUUGUGGGGGAGCAAUGAAGA	22	SupFam_549	N	NA	30	20	27	1	1	2	81	0	31	49	1	0
Cl_cgr-dp_21241	GGAGAAACUGCACUUCAUGUU	21	SupFam_169	N	NA	16	2	43	0	0	0	61	1	44	15	1	0
Cl_cgr-dp_21403	GUGGGUUGAUGAAGAGGUUGAA	22	SupFam_941	N	NA	25	16	23	0	0	0	64	4	21	38	1	0
Cl_cgr-dp_21526	GUGCAAUAAAAGAAGUCAAUU	21	SupFam_94	N	NA	21	8	11	0	0	0	40	1	38	1	0	0
Cl_cgr-dp_21722	AGUUGAACGUGACAAUGAAAG	21	SupFam_170	N	NA	10	16	26	0	0	0	52	0	36	14	2	0
Cl_cgr-dp_21832	UAUCCCAGUCUUUCUUCCUCAA	22	SupFam_942	N	NA	9	11	23	0	0	0	43	4	5	33	1	0
Cl_cgr-dp_21999	UCGGUGAAAAAGCUAAGAUGUAAU	24	SupFam_90	N	NA	13	17	17	0	0	0	47	0	0	3	0	44
Cl_cgr-dp_22167	CAUUUCAGACAUUACCAAGAAA	22	SupFam_171	N	NA	38	45	51	1	0	0	135	19	16	58	30	12
Cl_cgr-dp_22250	GCAUGUCAAGCUCACACCUAC	21	SupFam_943	N	NA	18	12	12	0	0	0	42	2	35	5	0	0
Cl_cgr-dp_23227	UGGGUUGACUGAAACAACACA	21	SupFam_553	N	NA	10	11	30	0	0	0	51	16	35	0	0	0
Cl_cgr-dp_23916	GGGCAUGGGUGGAGAAACUG	20	SupFam_147	N	NA	19	10	16	0	0	0	45	38	3	4	0	0
Cl_cgr-dp_24231	UGGCAAGUUGGUGAGACAAUU	21	SupFam_944	N	NA	28	19	29	2	2	1	81	12	54	15	0	0
Cl_cgr-dp_24644	UUUCAAAGUAUUGGGUUGUUGA	22	SupFam_388	N	NA	13	7	15	0	0	0	35	0	1	30	1	3
Cl_cgr-dp_24647	UUGUGGAAAAAGCAUAAUUCUU	22	SupFam_945	N	NA	7	7	21	0	0	0	35	0	0	35	0	0
Cl_cgr-dp_24981	GGUAUUAAAUCUUGCAAAACGUU	23	SupFam_554	N	NA	13	17	42	0	0	0	72	0	8	29	35	0
Cl_cgr-dp_25317	UUGUUGGGAGGAUUACUUAUU	21	SupFam_43	N	NA	25	26	38	0	1	0	90	26	52	12	0	0
Cl_cgr-dp_25324	UUAUAUCCUUCAACUUUACACUC	23	SupFam_946	N	NA	9	20	19	0	0	1	49	0	0	5	43	1
Cl_cgr-dp_25455	CGAUGAAGAAUAGUUUCACCAU	22	SupFam_947	N	NA	10	14	17	1	0	0	42	1	0	39	0	2
Cl_cgr-dp_25495	UUGUUGUUAUUAUUAUCUUGU	21	SupFam_948	N	NA	14	19	30	1	0	2	66	2	38	26	0	0
Cl_cgr-dp_25549	AUAAGAGUUGUAGUAUCCAUG	21	SupFam_472	N	NA	14	13	21	0	0	0	48	3	37	8	0	0
Cl_cgr-dp_25903	AAGGGGUAACUUGCGGAACU	20	SupFam_42	N	NA	23	20	18	0	0	0	61	45	16	0	0	0
Cl_cgr-dp_25989	CGUUGUUACUUUCAGCCAUU	20	SupFam_175	N	NA	31	44	29	1	2	3	110	30	50	30	0	0
Cl_cgr-dp_26171	AAAGAAAAGACAACACUCAUC	21	SupFam_555	N	NA	26	9	11	1	0	0	47	0	31	15	1	0
Cl_cgr-dp_26392	GAUGAUCUGAAAUGCUUAAAC	21	SupFam_29	N	NA	13	11	11	0	0	0	35	0	35	0	0	0
Cl_cgr-dp_26681	CUUGGAUGUACUCCUGAUCAAUU	23	SupFam_163	N	NA	16	14	14	0	0	1	45	0	0	4	39	2
Cl_cgr-dp_26729	UGGAGAAGCAGGGCACGUUUU	21	SupFam_187	N	NA	30	30	25	0	0	2	87	5	42	28	12	0
Cl_cgr-dp_26800	UUAGAAAGCAUCGUAGUAUCC	21	SupFam_18	N	Y	16	14	15	0	0	0	45	3	40	1	1	0
Cl_cgr-dp_26905	CGGAGGAGAGCUUUGGUGAUGA	22	SupFam_544	N	NA	22	34	29	1	2	4	92	3	43	43	0	3
Cl_cgr-dp_26933	UGGCGGAGGAAUAACAUCUUUGGU	24	SupFam_203	N	NA	13	13	15	1	0	0	42	0	0	0	7	35
Cl_cgr-dp_27191	ACACCACACUUCUUCAUCUCAA	22	SupFam_556	N	NA	16	13	30	0	0	0	59	6	11	39	2	1
Cl_cgr-dp_27731	GUCAUAAUAAUGAAAUACCAAA	22	SupFam_949	N	NA	3	11	25	0	0	0	39	2	5	28	1	3
Cl_cgr-dp_27891	GAUACAUUCACCCUCGUCUCU	21	SupFam_97	N	NA	14	13	16	0	0	0	43	0	37	5	1	0
Cl_cgr-dp_27936	UAAGACAUGUUAUCAACGUCG	21	SupFam_950	N	NA	9	8	25	0	0	0	42	7	32	2	1	0
Cl_cgr-dp_28079	UUGGCUGAGUGAGCAUCACUG	21	SupFam_951	N	NA	24	28	1	0	0	0	53	6	47	0	0	0
Cl_cgr-dp_28163	AAAUGGAAGAAGCCACACAUG	21	SupFam_98	N	NA	10	11	23	0	1	0	45	0	34	9	2	0
Cl_cgr-dp_28189	UGGGAGGGGGGAGAGUUCAAAU	22	SupFam_557	N	NA	13	8	9	0	0	0	30	0	1	28	1	0
Cl_cgr-dp_28225	UUUCCAGGAGAGAAGUUUUU	20	SupFam_44	N	NA	15	18	22	0	1	1	57	33	16	8	0	0
Cl_cgr-dp_28363	AAAUUGCGUUGUAGUUCCUGUCAA	24	SupFam_162	N	NA	18	18	11	0	0	1	48	0	0	6	14	28
Cl_cgr-dp_28484	GUUCCUCUUCUUUGCAUCCCA	21	SupFam_502	N	NA	10	12	12	0	0	0	34	3	30	1	0	0
Cl_cgr-dp_29126	CAUUUACCUUAAAUGUCCUGAUAC	24	SupFam_152	N	NA	4	19	13	0	0	0	36	0	0	3	7	26
Cl_cgr-dp_29225	ACAAACGACUCUCGGCAACGGA	22	SupFam_952	N	NA	53	45	24	2	1	0	125	51	26	38	7	3
Cl_cgr-dp_29268	GGUGGGAACUACAGCGUAAUUUGG	24	SupFam_166	N	NA	13	5	9	0	0	0	27	0	0	0	0	27
Cl_cgr-dp_29347	GGACAGAAAUUGCAAUGCUAUU	22	SupFam_953	N	NA	11	6	10	0	0	0	27	0	0	27	0	0
Cl_cgr-dp_29525	CGAAAGAGAUGAGUUCUUCUU	21	SupFam_368	N	NA	6	16	22	0	0	1	45	6	27	11	1	0
Cl_cgr-dp_29655	UUAGGACAAACAUUUGAGAAGGU	23	SupFam_35	N	Y	27	21	25	0	0	1	74	0	29	3	27	15
Cl_cgr-dp_30137	UUGAAGAGGACUUGGAAUUUU	21	SupFam_558	N	NA	86	31	67	0	0	1	185	22	81	58	24	0
Cl_cgr-dp_30538	AAUCCGGAGUACUUCCAAGUAUUG	24	SupFam_10	N	NA	10	8	10	0	0	0	28	0	0	3	0	25
Cl_cgr-dp_31330	GCGGCAAUUGUUACCACUAUCGGU	24	SupFam_521	N	NA	14	13	4	0	0	0	31	0	0	0	1	30
Cl_cgr-dp_31383	UAGAAUUGACUGUGUUAAGAGA	22	SupFam_352	N	NA	8	16	32	0	0	0	56	1	24	25	0	6
Cl_cgr-dp_32331	AAGGCUCGUAAUGUUGACUUU	21	SupFam_954	N	NA	7	12	11	0	0	0	30	1	27	2	0	0
Cl_cgr-dp_32426	UUGGAAGUAUUUUGGAUCAAUU	22	SupFam_36	N	NA	26	27	49	0	2	0	104	1	61	33	4	5
Cl_cgr-dp_32744	CCAACAGUCCCACACCCAUUU	21	SupFam_955	N	NA	14	7	8	0	0	0	29	1	27	1	0	0
Cl_cgr-dp_32777	AUUAUUGUUGGGAGGAUUACUUAU	24	SupFam_43	N	NA	14	11	12	0	0	0	37	0	0	2	5	30
Cl_cgr-dp_33793	UUCUUCUCCAACUCAUGUGUGG	22	SupFam_534	N	NA	13	15	20	1	0	0	49	0	13	32	0	4
Cl_cgr-dp_34338	UUUGACAUAAUUUCUGGCCCG	21	SupFam_200	N	N	13	10	11	0	0	0	34	1	32	1	0	0
Cl_cgr-dp_34443	UGAGAUUUGAGUUUAUGUUU	20	SupFam_172	N	NA	15	22	24	1	0	0	62	39	16	7	0	0
Cl_cgr-dp_35763	UUUCAUCAUCAUCUUCUGCU	20	SupFam_559	N	NA	23	24	10	0	0	2	59	29	25	5	0	0
Cl_cgr-dp_36070	CUUGGCAUUUCAUUAUUAUGACUC	24	SupFam_349	N	NA	7	17	20	0	0	0	44	0	0	0	3	41
Cl_cgr-dp_36135	UACGGUAGGAGCAUUUGCCU	20	SupFam_560	N	NA	13	15	19	0	0	0	47	24	21	2	0	0
Cl_cgr-dp_36185	GAAUUUGGUUGGUUCCCUCUAGU	23	SupFam_46	N	NA	11	8	12	0	0	0	31	0	0	0	28	3
Cl_cgr-dp_36475	AGAGAAGCACAUGAACGACUUAA	23	SupFam_93	N	Y	14	21	17	0	0	0	52	0	9	9	22	12
Cl_cgr-dp_37384	UGAGCUUUUCAUCUUCUUCG	20	SupFam_37	N	NA	24	23	19	0	0	0	66	49	11	6	0	0
Cl_cgr-dp_37659	UAUUGUUGGGAGGAUUACUU	20	SupFam_43	N	NA	12	18	22	0	0	1	53	43	10	0	0	0
Cl_cgr-dp_39526	GGAAAUUUCUCUGCUGGAGCAUU	23	SupFam_32	N	NA	11	14	17	0	0	0	42	0	1	4	36	1
Cl_cgr-dp_41074	CUAUGGAAAAAUCAGCUCUAGGUU	24	SupFam_30	N	NA	5	8	14	0	0	0	27	0	0	0	4	23
Cl_cgr-dp_42988	UAAGAGAUGAAGGAAGAAUU	20	SupFam_205	N	NA	22	12	17	0	0	1	52	28	16	8	0	0
Cl_cgr-dp_44478	CAUUUGGAGUGGGCGAGGGA	20	SupFam_214	N	NA	22	7	6	0	0	0	35	19	14	2	0	0
Cl_cgr-dp_44992	AGCUUGUAGUAAUUUAAUUUUU	22	SupFam_956	N	NA	6	15	11	0	0	0	32	0	8	18	4	2
Cl_cgr-dp_45104	AUCGAAAGAUUACACGACAUACAU	24	SupFam_212	N	NA	13	10	19	0	0	0	42	0	0	0	0	42
Cl_cgr-dp_46242	AGCCGGAUGUGAUACGAAGAUCGC	24	SupFam_957	N	NA	10	10	6	0	0	0	26	0	0	0	1	25
Cl_cgr-dp_46729	CUAUCUUCAUUGCUCCCCCACA	22	SupFam_958	N	NA	11	15	16	0	0	1	43	3	20	20	0	0
Cl_cgr-dp_46759	AGUAUCAGGAGACUUAAUCAAC	22	SupFam_89	N	NA	19	16	31	0	0	0	66	8	16	35	7	0
Cl_cgr-dp_46921	CUGAAGAUGAUCUGAAAUGCC	21	SupFam_29	N	NA	18	11	22	0	0	0	51	17	32	0	2	0
Cl_cgr-dp_46939	GUCUCACAACUUAUUCCAAAA	21	SupFam_959	N	NA	28	14	9	0	0	0	51	2	22	22	5	0
Cl_cgr-dp_47032	AUUGGGUACACUCAUGGUAGC	21	SupFam_960	N	NA	9	9	8	0	0	0	26	0	25	1	0	0
Cl_cgr-dp_47106	CGUCUGCCUGGGCGUCACGC	20	SupFam_961	N	NA	6	19	13	0	0	0	38	21	4	13	0	0
Cl_cgr-dp_47946	AAGAAGAUGAUGAUGAAACC	20	SupFam_561	N	NA	19	11	6	0	0	0	36	23	12	1	0	0
Cl_cgr-dp_48114	GUUCUUGAUGAUUGUUGUCUUGUC	24	SupFam_223	N	NA	6	7	11	0	0	0	24	0	0	0	5	19
Cl_cgr-dp_48754	CACUCACCUCGGCCUGCCAUUCUA	24	SupFam_4	N	NA	11	9	5	0	0	0	25	0	0	0	7	18
Cl_cgr-dp_49076	UGGCAUUGAAGAAUACAACGUUU	23	SupFam_145	N	NA	28	23	49	0	0	0	100	0	3	31	46	20
Cl_cgr-dp_49091	GCUCUUAGUUUCUCUGUGAG	20	SupFam_48	N	Y	10	5	19	0	0	0	34	20	14	0	0	0
Cl_cgr-dp_50368	CCUUCUUCUUCUUGGGCGGUG	21	SupFam_962	N	NA	11	11	5	0	0	0	27	1	23	3	0	0
Cl_cgr-dp_50745	CUUCUUCCUUCAUCUCUGAAAUU	23	SupFam_218	N	NA	11	14	16	0	0	0	41	0	1	13	24	3
Cl_cgr-dp_53165	GGACAAACUAUCUUUCACAGG	21	SupFam_963	N	NA	11	7	6	0	0	0	24	2	19	2	1	0
Cl_cgr-dp_53775	AUACUUGGAUGUACUCCUGAUCA	23	SupFam_163	N	NA	13	11	15	0	0	0	39	0	1	2	21	15
Cl_cgr-dp_54273	UGACUAUCCCACCACCAUUCCC	22	SupFam_964	N	NA	14	6	10	0	0	0	30	0	1	26	3	0
Cl_cgr-dp_57206	UAAUCAGGAGGUGAAAAACAGC	22	SupFam_92	N	NA	20	10	7	0	0	0	37	0	0	19	5	13
Cl_cgr-dp_60522	CAGUUCAGACAUCAUCAAGAAC	22	SupFam_171	N	NA	8	17	36	0	0	0	61	4	8	23	26	0
Cl_cgr-dp_60980	ACCAGUCCUUGUUCUUCCAUA	21	SupFam_965	N	NA	12	9	9	0	0	0	30	2	24	2	2	0
Cl_cgr-dp_62946	UGAAGUUUCUCGUGGCGUUUUUUU	24	SupFam_26	N	Y	9	21	18	0	0	0	48	0	0	0	1	47
Cl_cgr-dp_64688	UAGGACAAAGAAGACGUGUUU	21	SupFam_208	N	NA	20	6	21	0	0	0	47	14	19	10	4	0
Cl_cgr-pm_2	GAGCAUGUGUUUAAGAUGGUG	21	SupFam_345	N	NA	13542	18801	13990	150	285	337	47105	1090	45762	235	18	0
Cl_cgr-pm_3	UGGCAGAAGUAUGAAUCGCAGU	22	SupFam_6	N	Y	14037	17942	13376	114	141	179	45789	54	269	45229	164	73
Cl_cgr-pm_4	UGAAGAUUAUCUGAAAGGCUU	21	SupFam_29	N	NA	15872	16660	12310	116	179	176	45313	951	44148	194	20	0
Cl_cgr-pm_5	UGUCAUCGACUCCGUACAAGCA	22	SupFam_5	N	Y	11122	16872	12299	100	153	157	40703	58	2948	37584	84	29
Cl_cgr-pm_7	AACAGCUGUCUUGGAAUCCAUU	22	SupFam_230	N	NA	9228	14293	11899	69	91	88	35668	159	455	34260	727	67
Cl_cgr-pm_8	UGUUGUGUGAUCUUUCGAGAGU	22	SupFam_41	N	NA	22778	22875	17099	99	107	85	63043	121	4584	56420	1736	182
Cl_cgr-pm_10	AGGUCGAUCAGUAGAAAUGGAG	22	SupFam_88	N	NA	9249	14536	13243	56	81	132	37297	980	1002	30194	4797	324
Cl_cgr-pm_11	UUGCCAGUUAGUGUGCUGAAUU	22	SupFam_344	N	NA	10543	13042	8374	129	163	171	32422	78	2428	29701	145	70
Cl_cgr-pm_12	UUGGUGUGCUGAGUAGCUUCUC	22	SupFam_966	N	NA	10828	12066	8109	159	169	217	31548	128	2942	28385	75	18
Cl_cgr-pm_16	GAGGAAGUAUGGCAUGAAGAC	21	SupFam_22	N	Y	9704	13142	10066	47	103	85	33147	701	31287	1137	22	0
Cl_cgr-pm_17	UUUUUACUCUCAAGACGCUGU	21	SupFam_142	N	NA	7720	10749	10095	130	146	252	29092	804	28221	65	2	0
Cl_cgr-pm_18	CGAUCUGUUCACCAAGUGCAAC	22	SupFam_412	N	NA	5695	11729	10870	163	188	163	28808	245	556	26408	1241	358
Cl_cgr-pm_19	AUGACUUGUGGUAAGUUGGUU	21	SupFam_562	N	NA	5937	9658	7275	43	82	56	23051	111	22858	71	11	0
Cl_cgr-pm_21	CUUGUACGGAGCGAUGACAAC	21	SupFam_40	N	Y	6985	7860	5938	56	32	60	20931	369	20226	331	5	0
Cl_cgr-pm_22	GCAAGAACCUCAACUUCCAUG	21	SupFam_184	N	NA	4792	8340	6527	15	6	6	19686	220	19427	37	2	0
Cl_cgr-pm_24	UAGGAAGUAUGUAAUGGAAUAU	22	SupFam_231	N	NA	7409	10175	7804	48	68	59	25563	954	2661	17375	4507	66
Cl_cgr-pm_26	GUGAGCUUGACAUGUAGCAUG	21	SupFam_202	N	NA	6216	6335	4161	15	14	21	16762	123	16604	33	2	0
Cl_cgr-pm_27	CUCAUAAACUCAAAUCUCAUU	21	SupFam_512	N	NA	3929	6669	5859	6	6	12	16481	129	16307	42	3	0
Cl_cgr-pm_29	AGAGGAGGGACUCUUUGCCAUG	22	SupFam_232	N	NA	5291	5890	5324	31	30	17	16583	68	143	15933	407	32
Cl_cgr-pm_30	UGGAAAAAUCAGCUCUAGGUU	21	SupFam_30	N	NA	6040	9646	7755	51	81	94	23667	215	15219	8124	109	0
Cl_cgr-pm_31	AGUGGAUGUAUGCAAGAAGAC	21	SupFam_173	N	NA	4650	5741	4884	36	48	59	15418	264	14331	798	25	0
Cl_cgr-pm_33	UUGCAAGGUGUAAUAUGGUAUU	22	SupFam_82	N	NA	3501	6602	4582	39	54	49	14827	68	764	13672	320	3
Cl_cgr-pm_34	AUCAAGGAGGCUCUAGCUAAU	21	SupFam_204	N	NA	4196	5122	4270	36	45	33	13702	113	13371	187	31	0
Cl_cgr-pm_35	UCGGUUUCUGAUUCGGGUCCUU	22	SupFam_563	N	NA	4620	5513	4729	44	59	79	15044	31	129	14408	411	65
Cl_cgr-pm_36	AACGUCACGAGGAAUUUCAUA	21	SupFam_31	N	NA	8137	10804	10085	101	91	84	29302	1739	13604	13895	64	0
Cl_cgr-pm_37	GGUUGGUGUGCUUGAAUUGAUU	22	SupFam_564	N	NA	4413	5641	3723	18	24	17	13836	102	1770	11857	106	1
Cl_cgr-pm_38	UGAAGUUUCUUGUGGCGUUUU	21	SupFam_26	N	Y	5529	7679	5471	49	41	52	18821	259	14297	4229	36	0
Cl_cgr-pm_39	UGUAUAGUUUCUGCCACUCGU	21	SupFam_78	N	NA	3418	5181	4005	31	51	40	12726	49	12612	51	14	0
Cl_cgr-pm_40	CGGCUGGCGAAGUUAUGGGCC	21	SupFam_565	N	NA	6298	6188	4807	44	52	62	17451	135	17255	59	2	0
Cl_cgr-pm_42	CGUGUACCCUGGUUCUCCACC	21	SupFam_2	N	Y	2714	6254	4944	176	291	232	14611	104	14441	55	11	0
Cl_cgr-pm_43	UGGAUUCUGAGUCAGCUGUUAU	22	SupFam_102	N	NA	3662	4566	3650	46	61	60	12045	445	650	10820	90	40
Cl_cgr-pm_44	UUUUGCAAGAAUUCAGACCAC	21	SupFam_101	N	NA	3780	4839	3711	67	105	71	12573	241	12174	142	16	0
Cl_cgr-pm_45	UAAGGGGCAACUUGCGGGACC	21	SupFam_42	N	NA	4294	5883	5276	90	80	89	15712	398	15200	96	18	0
Cl_cgr-pm_46	UGAUGUUUUGCUUUACCUCUU	21	SupFam_566	N	NA	2565	4347	3598	67	112	146	10835	135	10251	445	4	0
Cl_cgr-pm_47	UAAGAGAUGAAGGAAGAAGAC	21	SupFam_205	N	NA	3041	4298	3673	24	55	57	11148	285	10395	451	17	0
Cl_cgr-pm_48	CCGGGAUAUAGGGCACCUGUU	21	SupFam_83	N	NA	3399	3879	2966	14	7	5	10270	232	9924	96	18	0
Cl_cgr-pm_49	AGGUAUUUUGAACAGCUUCUC	21	SupFam_346	N	NA	3310	3979	3036	59	97	122	10603	421	10093	84	5	0
Cl_cgr-pm_51	CCUAUAUGGAGGGGAGACAGU	21	SupFam_40	N	Y	2791	4229	3451	10	9	8	10498	179	9647	660	12	0
Cl_cgr-pm_53	GGAUGGAGUACCUUUGUUAGC	21	SupFam_413	N	NA	3219	4495	3640	14	14	13	11395	476	10545	363	11	0
Cl_cgr-pm_54	UGAACUUGCAAGUCUGGCCUU	21	SupFam_967	N	NA	3142	3278	2989	79	76	81	9645	80	9474	87	4	0
Cl_cgr-pm_56	UGUCUGUUUCACAUUCCAACUC	22	SupFam_414	N	NA	2655	3795	2980	23	51	64	9568	60	237	9231	32	8
Cl_cgr-pm_60	CUUCUUGCAUACUUUCACUGU	21	SupFam_567	N	NA	3544	4280	2929	45	46	60	10904	72	10805	26	1	0
Cl_cgr-pm_62	UAUUGUUGGGAGGAUUACUUAUC	23	SupFam_43	N	NA	3567	4467	3150	17	38	26	11265	0	824	2039	8248	154
Cl_cgr-pm_64	UGGGAGAGGAUAUAAUGACAU	21	SupFam_144	N	NA	2516	3538	2713	17	46	38	8868	394	7980	150	344	0
Cl_cgr-pm_65	GGGUGUUGGACGAUUGGCUAUC	22	SupFam_233	N	NA	3973	4435	3391	21	12	6	11838	24	40	8192	3408	174
Cl_cgr-pm_67	AGAAGAAGACGAGGAACUCAUG	22	SupFam_80	N	NA	2421	2861	2268	17	30	25	7622	50	149	7315	80	28
Cl_cgr-pm_69	UAUCCUGGGCAGCUUUGUAUG	21	SupFam_234	N	NA	3951	4668	3174	60	68	78	11999	74	11879	44	2	0
Cl_cgr-pm_70	GUUUGAAGCUGUUGAUCCAUG	21	SupFam_38	N	NA	2446	2695	2224	1	1	3	7370	185	7126	43	16	0
Cl_cgr-pm_72	UGCUAUUCUAGCUUCUGCCAUG	22	SupFam_50	N	Y	1514	2735	2591	8	10	8	6866	18	56	6771	17	4
Cl_cgr-pm_76	UGUGGAUCAUUUGUAGCACUUU	22	SupFam_363	N	NA	2504	2559	1684	20	54	45	6866	76	198	6498	43	51
Cl_cgr-pm_77	CUGAAGGUGACCAUAACUACU	21	SupFam_103	N	NA	3276	3471	2412	20	22	39	9240	617	8442	166	15	0
Cl_cgr-pm_78	GGUAUGAAUUCUUGCAAAACG	21	SupFam_554	N	NA	3779	3888	2561	6	5	4	10243	193	6964	1583	1503	0
Cl_cgr-pm_79	UCACAGAGAAGUUUAGAGCUA	21	SupFam_24	N	Y	3381	4346	2997	55	48	55	10882	1184	9645	36	17	0
Cl_cgr-pm_82	AGUCUGAUCUAGGUUGGGAAA	21	SupFam_104	N	NA	2356	2579	1848	8	3	13	6807	896	5720	100	91	0
Cl_cgr-pm_85	UUAGAGAUGAUCGGUAACUGCU	22	SupFam_226	N	NA	2252	2519	2059	19	20	16	6885	14	220	6610	33	8
Cl_cgr-pm_87	UGAGAUUUGAGUUCAUGGGGG	21	SupFam_172	N	NA	1848	2403	2260	8	23	28	6570	70	6448	48	4	0
Cl_cgr-pm_89	GAAGCUGUUCAAAAUACCGAG	21	SupFam_347	N	NA	2052	2752	2228	18	4	5	7059	537	5479	1029	14	0
Cl_cgr-pm_91	GAAUGAUAAGUAGGGGUGAGC	21	SupFam_23	N	NA	1807	2414	2143	3	1	2	6370	30	6212	102	26	0
Cl_cgr-pm_92	GAGGAGGGUGAAUGUAUCUGU	21	SupFam_56	N	NA	2297	2089	2007	2	1	4	6400	75	5986	328	11	0
Cl_cgr-pm_97	UGGAUGUUCUUAUCAAUAUAGC	22	SupFam_235	N	NA	1767	3055	1597	4	1	0	6424	5	21	5941	132	325
Cl_cgr-pm_98	UAAGACAGUUGAAGUGAACCA	21	SupFam_34	N	NA	2561	2899	2115	28	22	29	7654	451	7042	114	47	0
Cl_cgr-pm_100	CAUCUCAACGGAUUCAAGCUU	21	SupFam_105	N	NA	2435	2601	1799	46	61	58	7000	242	5232	1060	466	0
Cl_cgr-pm_101	GUCUAUGAAUAUGUGUGGAAUG	22	SupFam_236	N	NA	1859	2509	1678	6	6	3	6061	22	911	4937	95	96
Cl_cgr-pm_102	CACCCCAUUUUCUAUGUAGCUU	22	SupFam_356	N	NA	1328	2251	1699	30	27	29	5364	23	174	5145	17	5
Cl_cgr-pm_103	CUUGUUGUUGUUUCUGAACUC	21	SupFam_367	N	NA	2141	2165	1507	27	30	45	5915	374	5239	291	11	0
Cl_cgr-pm_104	UACCGGGUAAUCUUGUUGCAU	21	SupFam_351	N	NA	1377	2212	1541	17	30	23	5200	119	4812	260	9	0
Cl_cgr-pm_107	UCACCUCCGCCUGCCAUUCUG	21	SupFam_4	N	NA	1582	2235	1781	24	37	31	5690	115	5491	77	7	0
Cl_cgr-pm_108	UUAAGGGGUAACUUGCGGAACC	22	SupFam_42	N	NA	2190	2180	1970	18	29	32	6419	83	378	5937	16	5
Cl_cgr-pm_111	AGAGCUCUCUUUGGUCCAAAG	21	SupFam_415	N	NA	1383	2317	1723	37	18	16	5494	537	4188	723	46	0
Cl_cgr-pm_112	GGAAGAAUGAAUGAGUACAUG	21	SupFam_416	N	NA	951	1819	1552	2	0	0	4324	45	4219	50	10	0
Cl_cgr-pm_114	UCACCUCUACCUGUCAUUCUG	21	SupFam_4	N	NA	1286	1715	1281	96	88	70	4536	109	4198	227	2	0
Cl_cgr-pm_115	GUGUUGGCAUUGUCUCUCAGA	21	SupFam_568	N	NA	1114	1556	1339	1	1	1	4012	79	3854	9	70	0
Cl_cgr-pm_117	AUUGGAAGUAUUCAGGAUCUA	21	SupFam_36	N	NA	1723	2212	1330	24	23	22	5334	638	4662	28	6	0
Cl_cgr-pm_118	GGUAGAUGAAGAGGGUACAGU	21	SupFam_106	N	NA	1125	1771	1485	1	7	4	4393	26	4016	333	18	0
Cl_cgr-pm_121	UGAGUAGAGAAGGCUUGUCAG	21	SupFam_968	N	NA	1033	1480	1278	17	16	15	3839	35	3774	30	0	0
Cl_cgr-pm_122	UCGGCAAUGUCUAGGGGCUCA	21	SupFam_569	N	NA	1727	1947	1419	15	27	28	5163	237	4901	17	8	0
Cl_cgr-pm_123	AUCAGGACAUUUAAGGUAAUU	21	SupFam_146	N	NA	1542	1980	1185	7	14	26	4754	59	4497	55	143	0
Cl_cgr-pm_128	UGCUGCAUGUUAAGCUCACUU	21	SupFam_79	N	NA	1068	1884	1109	32	24	45	4162	123	3763	268	8	0
Cl_cgr-pm_129	UUUUCCGUUGAGAAGUUUCCUA	22	SupFam_44	N	NA	1522	2232	1292	16	20	12	5094	100	1116	3788	89	1
Cl_cgr-pm_131	GGACUAUAUACCUUCACAUA	20	SupFam_371	N	NA	1016	1387	1024	0	0	0	3427	3389	30	8	0	0
Cl_cgr-pm_133	UUAGCCAAUUCCCUGCACCCGU	22	SupFam_237	N	NA	1208	1651	1289	17	24	34	4223	13	407	3775	27	1
Cl_cgr-pm_134	AUUCCAUUUCAUGCUUCCCAUG	22	SupFam_400	N	NA	1019	1534	1480	12	20	20	4085	5	125	3660	291	4
Cl_cgr-pm_137	UGGUUCGAGUUUAUUGAGGUC	21	SupFam_47	N	NA	948	1805	1173	9	19	15	3969	40	3905	19	5	0
Cl_cgr-pm_140	UGGCAAAAGUAGGACUCGCAAU	22	SupFam_6	N	Y	1153	1386	1088	18	29	38	3712	62	50	3496	94	10
Cl_cgr-pm_142	AGCGUGACGGGGAAUUUCAUG	21	SupFam_31	N	NA	2535	2618	2137	8	6	6	7310	65	5308	1847	90	0
Cl_cgr-pm_143	GAAUUUGCGUGGUUCCCUCUAGC	23	SupFam_46	N	NA	1021	1534	1441	1	2	1	4000	0	10	13	3901	76
Cl_cgr-pm_144	GAAUACGGGUGGAAGCAGACA	21	SupFam_85	N	NA	1403	1363	955	0	0	1	3722	286	3127	202	107	0
Cl_cgr-pm_146	GCCUUGAAUCUGUUGAGAUGAAAC	24	SupFam_182	N	NA	1901	2646	1836	7	11	12	6413	0	0	2946	72	3395
Cl_cgr-pm_147	CUUCUUGCCGUACUUCCUCUG	21	SupFam_3	N	Y	2175	2725	1914	18	29	15	6876	1020	5699	152	5	0
Cl_cgr-pm_148	CAUCAUGGUUAUUGUGGAGAG	21	SupFam_174	N	NA	1164	1469	1076	8	14	11	3742	53	3262	426	1	0
Cl_cgr-pm_149	UUCGGUAGAACCAGAAGCCGU	21	SupFam_57	N	NA	1106	1465	940	16	11	12	3550	38	3470	39	3	0
Cl_cgr-pm_151	UAAUCUUUCAAGAUAUGCGAA	21	SupFam_206	N	NA	926	1240	763	8	14	15	2966	58	2893	11	4	0
Cl_cgr-pm_154	UGAUUAUGUCUCCUGGUACUAGCC	24	SupFam_33	N	NA	1623	2801	1687	7	8	11	6137	0	0	1318	616	4203
Cl_cgr-pm_155	AAACCAUAUCGUAGCACGCAU	21	SupFam_417	N	NA	821	1442	1137	24	25	28	3477	118	3220	133	6	0
Cl_cgr-pm_156	GGGCAUGGGUGGAGAAACUGAAA	23	SupFam_147	N	NA	1211	1649	1344	3	7	3	4217	0	83	415	3663	56
Cl_cgr-pm_157	GGAAAUUUCUCUGCUGGAGC	20	SupFam_32	N	NA	1173	1663	1247	1	4	0	4088	3330	689	69	0	0
Cl_cgr-pm_158	ACUGUCACUAGGAAUUUCAUA	21	SupFam_31	N	NA	1874	2169	1782	19	8	12	5864	407	4952	449	56	0
Cl_cgr-pm_162	CGAGUGACAAUAUGUUUUCCC	21	SupFam_9	N	Y	1016	2007	1163	16	20	16	4238	70	3959	179	30	0
Cl_cgr-pm_167	UCGAGCAAGAACAACAGAACC	21	SupFam_969	N	NA	984	1260	1114	10	16	24	3408	21	3364	10	13	0
Cl_cgr-pm_169	UAGGAAGUGGCACCAAGAACAU	22	SupFam_489	N	NA	1483	1711	1195	10	13	17	4429	97	1509	2782	30	11
Cl_cgr-pm_172	UGAAGUUCCUCGUCGCGUUUU	21	SupFam_26	N	Y	989	1231	796	11	26	15	3068	69	2639	339	21	0
Cl_cgr-pm_177	CCUCAAUAAACACGAUCCAUG	21	SupFam_418	N	NA	870	1084	924	0	0	0	2878	52	2810	15	1	0
Cl_cgr-pm_180	CUUCAUGGAAUGGAGUCUCCU	21	SupFam_474	N	NA	1206	1227	769	14	8	10	3234	142	2838	250	4	0
Cl_cgr-pm_181	UGAGAAGAUUGUGUAACCCGC	21	SupFam_185	N	NA	929	1101	860	10	10	17	2927	12	2906	8	1	0
Cl_cgr-pm_183	UGGAAGUUGUGGUGCUUGCAC	21	SupFam_11	N	Y	2160	2371	1554	16	39	38	6178	124	5987	61	6	0
Cl_cgr-pm_184	GGAUGGAGGGGAUGAUGCGUU	21	SupFam_7	N	Y	1083	1572	1179	1	4	6	3845	87	3672	81	5	0
Cl_cgr-pm_185	UCUCAUUGUUACUUUCAGCCAU	22	SupFam_175	N	NA	910	1688	1314	16	25	29	3982	138	661	2540	524	119
Cl_cgr-pm_189	ACAGAACUGAAUGACGACUCGU	22	SupFam_471	N	NA	824	1033	823	3	6	12	2701	1	86	2596	17	1
Cl_cgr-pm_191	UGGCAUUGAAGAAUACAACGA	21	SupFam_145	N	NA	957	1063	557	12	21	11	2621	229	2291	86	15	0
Cl_cgr-pm_194	CCUAUAUGGUGGAGAGGAUGAC	22	SupFam_570	N	NA	786	1205	944	8	10	3	2956	56	377	2416	104	3
Cl_cgr-pm_195	CACCUAUUACACCUUGCAAGA	21	SupFam_176	N	NA	554	929	742	9	12	14	2260	89	2162	6	3	0
Cl_cgr-pm_197	CGGUAGAACAAAUCUUUCAUU	21	SupFam_84	N	NA	1075	1002	686	1	2	4	2770	17	2392	342	19	0
Cl_cgr-pm_199	UAAAUGUGAAGUCUGCAUCUU	21	SupFam_355	N	NA	1224	1480	1078	8	8	18	3816	252	2409	1121	34	0
Cl_cgr-pm_200	UAUACCGUUGUCUCUAUGGCCU	22	SupFam_970	N	NA	957	1004	698	14	18	12	2703	6	102	2585	7	3
Cl_cgr-pm_204	UAUAUUGAUAAGAACAUCUAAA	22	SupFam_409	N	NA	1080	1028	639	10	22	19	2798	204	348	2118	82	46
Cl_cgr-pm_208	UAGCUAGAGCCUCCUUGGUCA	21	SupFam_358	N	NA	715	894	781	6	1	7	2404	292	2073	24	15	0
Cl_cgr-pm_209	GGAAGAUGGAUGAGUAUAAUG	21	SupFam_238	N	NA	828	917	797	0	0	1	2543	80	2413	39	11	0
Cl_cgr-pm_210	UCACAGAGAAAUGUAGAGCUG	21	SupFam_24	N	Y	804	934	770	4	5	10	2527	24	2135	367	1	0
Cl_cgr-pm_211	UAGGACAAAGAAGACGUGGAA	21	SupFam_208	N	NA	785	867	786	10	12	18	2478	215	2136	118	9	0
Cl_cgr-pm_212	CUAGCAAGAGCUGGGAUUUUCUU	23	SupFam_571	N	NA	832	1108	695	2	4	5	2646	0	43	417	2175	11
Cl_cgr-pm_214	GUUCUUGGUGUCGCUUUCUAAC	22	SupFam_372	N	NA	839	823	567	5	0	6	2240	45	85	2096	14	0
Cl_cgr-pm_217	UCAACCAAUCUCCUGCACAUU	21	SupFam_239	N	NA	1297	1962	1571	17	9	15	4871	226	2571	2018	56	0
Cl_cgr-pm_220	UUCAUUCGAGUCAAAAACCUUU	22	SupFam_971	N	NA	551	967	592	5	16	12	2143	9	47	2020	56	11
Cl_cgr-pm_221	UGCGAUUCCUACUCUUGCCGUG	22	SupFam_50	N	Y	636	1003	831	2	2	8	2482	10	186	2185	100	1
Cl_cgr-pm_222	UUAGGCAUGUACUCGUAUGUUA	22	SupFam_240	N	NA	970	1002	681	17	16	14	2700	41	505	1987	16	151
Cl_cgr-pm_229	GCGUGUUACGAUAUGGCUUG	20	SupFam_572	N	NA	1201	1824	1350	63	32	23	4493	1932	2509	52	0	0
Cl_cgr-pm_233	CAGUGAACAAGUUACCGGGGU	21	SupFam_177	N	NA	629	767	624	5	12	12	2049	25	1987	35	2	0
Cl_cgr-pm_234	GCCCGGAGAUUAAGUCGUUAUU	22	SupFam_972	N	NA	582	901	757	5	2	0	2247	29	77	1869	267	5
Cl_cgr-pm_235	GUUCGCUUCAACUGUCUUAUU	21	SupFam_107	N	NA	575	850	557	12	7	8	2009	26	1856	88	39	0
Cl_cgr-pm_239	UACGAUUUGAUCUCCGGGUAU	21	SupFam_419	N	NA	962	1231	876	9	9	9	3096	130	1897	1066	3	0
Cl_cgr-pm_241	UUGGGUGUGGGUUGGUUGGAA	21	SupFam_161	N	NA	513	1014	703	1	6	5	2242	201	1666	368	7	0
Cl_cgr-pm_242	UUGACAAUCCCUUUCCUACCGU	22	SupFam_178	N	Y	675	1052	628	5	15	16	2391	11	26	2302	50	2
Cl_cgr-pm_244	CUUGUGGAGAUCGUCGAUGAU	21	SupFam_478	N	NA	797	617	474	1	0	0	1889	16	1807	65	1	0
Cl_cgr-pm_246	UGAACCAUCUCUCUUCCAUGC	21	SupFam_221	N	NA	1432	1784	1477	16	31	32	4772	1898	2198	653	23	0
Cl_cgr-pm_249	CGCAUCAUUUCAUCCAUCCUG	21	SupFam_53	N	Y	772	996	667	8	11	10	2464	116	2284	59	5	0
Cl_cgr-pm_250	CCAUCUUGAAUACAUGCUCAC	21	SupFam_91	N	NA	760	1446	1143	12	23	19	3403	457	2886	59	1	0
Cl_cgr-pm_251	GCUACAUAGUCAAUGGGAUGGU	22	SupFam_353	N	NA	664	1302	1064	5	6	3	3044	5	41	1836	1152	10
Cl_cgr-pm_253	CUAAUUGUAACAAUGAUAUGGA	22	SupFam_241	N	NA	435	674	593	6	14	10	1732	24	89	1607	10	2
Cl_cgr-pm_254	UUCUGCAAGUUGCUCCUAACC	21	SupFam_159	N	NA	936	1304	1115	1	1	2	3359	937	2374	30	18	0
Cl_cgr-pm_255	UAGCAUUGUAAGAUUCAUCCA	21	SupFam_242	N	NA	692	673	415	6	7	14	1807	159	1638	4	6	0
Cl_cgr-pm_256	UCUGUUUCCACCCGCAUUCUU	21	SupFam_87	N	NA	798	1002	803	8	13	21	2645	72	2510	56	7	0
Cl_cgr-pm_257	AGAAAGCAUCGUAGUAUCCUG	21	SupFam_18	N	Y	523	730	568	7	10	5	1843	74	1744	21	4	0
Cl_cgr-pm_259	UGACAAGUUCGAUAAUUCCGUU	22	SupFam_973	N	NA	399	802	590	2	5	11	1809	2	6	1714	86	1
Cl_cgr-pm_261	CGGUUUCGGUUUCCAUUCUUU	21	SupFam_573	N	NA	526	640	580	7	7	14	1774	30	1690	54	0	0
Cl_cgr-pm_268	UUCUCUCGAAAGUUUGUCCUGA	22	SupFam_14	N	NA	532	609	475	1	2	3	1622	2	75	1536	8	1
Cl_cgr-pm_271	UUUUGCAUGUAUUCGUAGACAA	22	SupFam_1	N	Y	884	1155	658	15	17	15	2744	84	411	2211	32	6
Cl_cgr-pm_276	AAUGAGUACAAAGGCUUGAGA	21	SupFam_405	N	NA	427	637	503	1	3	3	1574	60	1423	35	56	0
Cl_cgr-pm_277	AUGGGAGAUGCUUUCUGGUAAU	22	SupFam_95	N	NA	870	1294	1058	12	14	12	3260	144	1477	1578	35	26
Cl_cgr-pm_284	UGAGAGACAAUGCUAGCAUUU	21	SupFam_574	N	NA	440	764	556	4	17	9	1790	135	1557	89	9	0
Cl_cgr-pm_285	CAAUGUUAUCUUUGAACUCUU	21	SupFam_575	N	NA	625	589	342	31	33	23	1643	64	1564	15	0	0
Cl_cgr-pm_287	CUAGUAUCAGGAGACUUAAUCAAU	24	SupFam_89	N	NA	614	830	449	0	0	1	1894	0	0	201	205	1488
Cl_cgr-pm_289	UAGUUAUGGUCGCCUUCAGAU	21	SupFam_420	N	NA	789	894	659	4	5	9	2360	49	2205	90	16	0
Cl_cgr-pm_295	UACGGCGGUGGAAUAACAUCAC	22	SupFam_360	N	NA	516	624	425	11	8	16	1600	31	37	1464	67	1
Cl_cgr-pm_297	UGCUAUUGCAAAGAAAUCCUG	21	SupFam_576	N	NA	466	580	355	11	15	12	1439	6	1416	16	1	0
Cl_cgr-pm_299	CAGGAUUCGAAUCAGAAAUUGAAG	24	SupFam_179	N	NA	718	1113	851	0	2	0	2684	0	0	1234	70	1380
Cl_cgr-pm_302	UGGCAUGAGUCUCUCCUUUGA	21	SupFam_180	N	NA	490	744	503	4	12	10	1763	300	1432	31	0	0
Cl_cgr-pm_303	UGUGCCUUCUUCAUUUACAAA	21	SupFam_181	N	NA	722	796	667	15	25	36	2261	163	1324	739	35	0
Cl_cgr-pm_305	AGUCUGAUCUAGGUUGGGAAAAAU	24	SupFam_104	N	NA	520	593	461	2	0	2	1578	0	0	2	23	1553
Cl_cgr-pm_310	AGAAGAAGAUGAGAAACUCAUA	22	SupFam_80	N	NA	508	497	502	0	2	1	1510	3	75	1313	83	36
Cl_cgr-pm_312	CGUGUACCCGGCUUCCCCAGC	21	SupFam_2	N	Y	372	600	462	19	46	17	1516	16	1487	9	4	0
Cl_cgr-pm_313	CAGUAGUUCUCUCUGCCACCAA	22	SupFam_151	N	NA	563	569	638	12	11	11	1804	86	460	1249	6	3
Cl_cgr-pm_314	UGCAAGGUUGCUCAGGGUAGC	21	SupFam_421	N	NA	1112	1492	1044	2	2	3	3655	17	3629	9	0	0
Cl_cgr-pm_316	AUGGAAUGAGAAUGCAGAGGG	21	SupFam_577	N	NA	410	621	483	0	4	3	1521	32	1467	19	3	0
Cl_cgr-pm_317	GAAUGUCAGGUAGGGGUGAAC	21	SupFam_23	N	NA	614	672	534	0	0	0	1820	51	1692	63	14	0
Cl_cgr-pm_320	UGAGUUGAAGCUUGAUAUUUCUG	23	SupFam_217	N	NA	632	704	491	6	5	5	1843	0	14	553	1272	4
Cl_cgr-pm_324	GAUUGAGGCUAUUGAUCCAUG	21	SupFam_38	N	NA	531	479	297	0	1	0	1308	28	1275	3	2	0
Cl_cgr-pm_327	UUGCCCUUGAUAUCACAUUGCCAC	24	SupFam_402	N	NA	389	631	540	5	10	8	1583	0	0	28	103	1452
Cl_cgr-pm_329	CUGUGAAGGUAGUCUAGCCCUC	22	SupFam_49	N	Y	494	737	479	16	11	12	1749	28	306	1395	15	5
Cl_cgr-pm_330	UAGUUUGAGCAGCUAGGCUUU	21	SupFam_578	N	NA	421	525	333	3	7	16	1305	5	1283	16	1	0
Cl_cgr-pm_331	GAGUGGAAGGAACUAUACAUG	21	SupFam_98	N	NA	478	450	365	0	0	0	1293	33	1254	5	1	0
Cl_cgr-pm_341	UAGCCAAUCCCCUGCACCUUU	21	SupFam_237	N	NA	363	498	470	4	12	10	1357	45	1226	84	2	0
Cl_cgr-pm_345	GCACGAUCUAGUUCAAGAAAU	21	SupFam_108	N	NA	514	460	322	0	0	1	1297	10	1229	51	7	0
Cl_cgr-pm_346	UACUCGGGUGACAUGUAGCCAA	22	SupFam_59	N	NA	452	496	311	3	5	4	1271	41	110	1096	18	6
Cl_cgr-pm_348	AGGACAAACAUUUGAGAGGAUA	22	SupFam_35	N	Y	656	592	424	5	0	1	1678	23	206	1315	8	126
Cl_cgr-pm_353	UAAUACUGUCACUGUAAGAUGUU	23	SupFam_579	N	NA	1275	417	16	0	0	3	1711	0	50	415	1203	43
Cl_cgr-pm_362	CAAUUCAAGCACACCAACCAA	21	SupFam_580	N	NA	446	525	450	11	7	8	1447	360	1079	8	0	0
Cl_cgr-pm_364	UGCACCUCGUGAACAGAUUGGA	22	SupFam_246	N	NA	353	520	498	2	0	2	1375	20	140	1166	21	28
Cl_cgr-pm_365	UGAGUUCGGGUUGAGUUUCCA	21	SupFam_150	N	NA	492	472	348	7	9	7	1335	183	1074	25	53	0
Cl_cgr-pm_371	UAGAGAUGAUGACGAAAAGU	20	SupFam_581	N	NA	367	564	405	1	0	0	1337	1123	211	3	0	0
Cl_cgr-pm_376	GAGGUACGUAGUUACUCGACCA	22	SupFam_582	N	NA	578	1260	704	264	147	151	3104	869	1011	1124	83	17
Cl_cgr-pm_389	GAGAGGGUAUUGAAGUCUGGGU	22	SupFam_211	N	NA	741	784	659	13	12	7	2216	10	1020	1139	28	19
Cl_cgr-pm_390	AGGACAACUUUUGAGAAGAUA	21	SupFam_198	N	Y	546	498	323	0	0	0	1367	45	1258	21	43	0
Cl_cgr-pm_394	CGUCUUCUCCUCCAUAUAGGUA	22	SupFam_5	N	Y	388	450	237	0	1	0	1076	2	84	983	2	5
Cl_cgr-pm_395	CAUUAGGGUUUGAAGGUUCCA	21	SupFam_131	N	Y	422	378	260	17	5	7	1089	105	981	2	1	0
Cl_cgr-pm_406	UUACUUCAGGCUCCCAUUCUG	21	SupFam_4	N	NA	428	542	362	2	6	9	1349	33	1235	79	2	0
Cl_cgr-pm_407	UCUUCUCAAAUGUUUGCCCUGA	22	SupFam_14	N	NA	313	448	271	0	0	5	1037	6	77	933	6	15
Cl_cgr-pm_408	GAAACUCAACCCGAACUCAGA	21	SupFam_480	N	NA	464	499	384	1	0	2	1350	52	1041	249	8	0
Cl_cgr-pm_410	AUCGAAAGAUUACACGACAUA	21	SupFam_212	N	NA	437	745	690	7	6	4	1889	88	1727	64	10	0
Cl_cgr-pm_433	UAUCUGAAAGUAUCUCCCAUC	21	SupFam_165	N	NA	492	659	627	1	1	2	1782	54	1256	442	30	0
Cl_cgr-pm_435	UAGGGUGAAGGUGAAAAUCGU	21	SupFam_974	N	NA	300	393	299	4	5	8	1009	22	977	7	3	0
Cl_cgr-pm_447	UAUGCUGAUCCAUUGCUUCUC	21	SupFam_422	N	NA	269	412	314	1	5	3	1004	32	969	3	0	0
Cl_cgr-pm_450	UCUGAUGAGUGUUGUCUCUUC	21	SupFam_223	N	NA	280	470	288	3	8	4	1053	63	957	10	23	0
Cl_cgr-pm_452	AACUUGGAUGAAGUUCGAGAGU	22	SupFam_975	N	NA	249	466	280	1	0	0	996	1	51	934	5	5
Cl_cgr-pm_456	UGAUUAUGUCUCCUGGUACUAA	22	SupFam_33	N	NA	500	634	395	5	11	7	1552	440	166	931	11	4
Cl_cgr-pm_460	UUACCUUAAAUGUCCUGAUAC	21	SupFam_152	N	NA	484	507	378	3	3	4	1379	137	1053	147	42	0
Cl_cgr-pm_463	UCUGGAAUUUUUGGUGGAGAC	21	SupFam_207	N	NA	360	419	306	0	11	7	1103	26	1017	54	6	0
Cl_cgr-pm_464	UGUACUCGUUCCUCUUCCAU	20	SupFam_254	N	NA	319	400	297	0	3	0	1019	929	88	2	0	0
Cl_cgr-pm_481	GGCUUUGUGGUUAAGGGCACU	21	SupFam_403	N	NA	215	432	321	0	2	1	971	3	921	43	4	0
Cl_cgr-pm_482	GUCAUUAUAUCUUCUCUCACG	21	SupFam_109	N	NA	355	447	267	3	3	3	1078	17	1057	1	3	0
Cl_cgr-pm_483	UUUGGUGAAGAUCGGUGUCUAC	22	SupFam_976	N	NA	399	425	267	7	8	24	1130	25	38	897	152	18
Cl_cgr-pm_485	UUCAGCACACUAACUGACAAGU	22	SupFam_359	N	NA	292	439	294	1	5	4	1035	3	75	909	38	10
Cl_cgr-pm_495	GGUUGCAGAGAGAACUACUAGU	22	SupFam_58	N	NA	741	667	406	1	0	0	1815	22	24	880	862	27
Cl_cgr-pm_499	AGUGCAACUAGGAAUUUUAUA	21	SupFam_31	N	NA	263	344	238	1	5	1	852	62	777	6	7	0
Cl_cgr-pm_503	GAUGGAAUGAAAUGCAGAGUG	21	SupFam_583	N	NA	270	366	249	0	0	1	886	39	844	3	0	0
Cl_cgr-pm_519	UCAGUUUCUCCUACAUGCCUAA	22	SupFam_977	N	NA	305	379	305	4	6	3	1002	51	106	752	86	7
Cl_cgr-pm_523	GGUUGAAAGUGACAAUGAGGGA	22	SupFam_170	N	NA	343	530	450	1	1	2	1327	35	168	753	48	323
Cl_cgr-pm_524	UGAAUCUUCUCUCUCCAUGUU	21	SupFam_423	N	NA	279	370	236	1	5	3	894	25	853	15	1	0
Cl_cgr-pm_525	UUGGGUGUGUGUUGGUUUGGA	21	SupFam_161	N	NA	249	449	310	2	3	0	1013	108	748	29	128	0
Cl_cgr-pm_542	GAGUAAUCCUUCUAACAAUUCC	22	SupFam_390	N	NA	397	627	396	3	2	1	1426	15	230	959	184	38
Cl_cgr-pm_547	CAAUUGCUUCCUUCAUUCAAGC	22	SupFam_392	N	NA	310	322	236	1	1	1	871	0	7	864	0	0
Cl_cgr-pm_548	UCAGUAGGUUUGGUCAAUGAGA	22	SupFam_110	N	NA	316	370	237	1	0	1	925	12	107	721	5	80
Cl_cgr-pm_561	GAAAACAUAUUGUCACUUGUU	21	SupFam_15	N	Y	231	421	224	4	2	2	884	71	795	18	0	0
Cl_cgr-pm_567	UGAGAUCAUUGUGAAAGCUGUUU	23	SupFam_584	N	NA	947	333	5	2	1	3	1291	0	26	311	839	115
Cl_cgr-pm_571	AAUCUUCUCUUCCAUAUGGGUA	22	SupFam_5	N	Y	301	389	260	2	6	7	965	21	236	703	1	4
Cl_cgr-pm_576	AGCCGCUAGAGAUUGUCGAUG	21	SupFam_243	N	NA	542	440	359	0	1	0	1342	36	1027	274	5	0
Cl_cgr-pm_580	AAUGCGAUCCCUUUGAACAUC	21	SupFam_13	N	Y	172	324	279	10	28	37	850	16	819	15	0	0
Cl_cgr-pm_588	AUGGAGGAGAGAUGAUUCAUG	21	SupFam_244	N	NA	217	286	259	3	4	5	774	20	750	4	0	0
Cl_cgr-pm_589	CGUAUUCUCUUUCAUAAGCUU	21	SupFam_370	N	NA	223	348	208	2	3	3	787	41	737	4	5	0
Cl_cgr-pm_593	UAAAAUUCCUAGUUGCAUUUC	21	SupFam_26	N	Y	238	289	194	3	1	3	728	11	707	10	0	0
Cl_cgr-pm_595	CAGGAGCCAUAUACACUGGGU	21	SupFam_978	N	NA	248	319	242	0	0	0	809	8	776	24	1	0
Cl_cgr-pm_608	UGAGUCCUCUAAGUUUCUUCUU	22	SupFam_81	N	NA	167	343	313	3	1	5	832	5	15	756	52	4
Cl_cgr-pm_620	CGCAAAGAGACGGGGGCGAGC	21	SupFam_979	N	NA	246	308	305	1	0	0	860	14	817	28	1	0
Cl_cgr-pm_622	UGAAGGAUUGGUUUCCACCGAA	22	SupFam_365	N	NA	294	330	220	3	1	3	851	38	58	645	79	31
Cl_cgr-pm_629	GAAUGUCAGCUUGAAGUAAAU	21	SupFam_23	N	NA	259	328	274	1	0	1	863	15	673	172	3	0
Cl_cgr-pm_634	AGGUUUUUGAUUUGAAUGAAAU	22	SupFam_585	N	NA	206	425	202	0	0	0	833	30	59	673	38	33
Cl_cgr-pm_635	UUAUCUCUUUCACUAUUUCUU	21	SupFam_424	N	NA	264	374	277	3	7	10	935	7	696	230	2	0
Cl_cgr-pm_641	UCAAUGCCAUCCCUUUGGACG	21	SupFam_13	N	Y	195	256	189	17	36	56	749	14	729	6	0	0
Cl_cgr-pm_646	UUCUGGUAGGGUCUGAAGUGAA	22	SupFam_156	N	NA	247	358	308	1	5	1	920	39	227	605	12	37
Cl_cgr-pm_649	AUGAGAUGAUGGUGUUCAUUU	21	SupFam_586	N	NA	236	256	201	3	0	2	698	17	676	5	0	0
Cl_cgr-pm_651	UUUUCGUCAUCAUCUCUAACG	21	SupFam_587	N	NA	272	401	262	4	3	7	949	178	709	59	3	0
Cl_cgr-pm_652	CGUGAAGAUAUGCUAGUCCUC	21	SupFam_49	N	Y	343	472	333	1	3	5	1157	53	869	232	3	0
Cl_cgr-pm_662	CGGAUUCUGAGUCAGUUGCUU	21	SupFam_102	N	NA	259	278	167	5	1	12	722	42	678	2	0	0
Cl_cgr-pm_666	UCAUCAUGGUUGUUGUGGAAA	21	SupFam_174	N	NA	488	563	416	4	7	0	1478	79	612	599	188	0
Cl_cgr-pm_669	GUUCUAGAGACAACAACAAGUU	22	SupFam_398	N	NA	219	350	207	3	2	1	782	7	41	676	56	2
Cl_cgr-pm_683	GCAACUAACUUAGAAUCCACU	21	SupFam_411	N	NA	190	326	282	2	0	1	801	19	661	117	4	0
Cl_cgr-pm_684	CGACAAACUCGAUGACUCCGAC	22	SupFam_588	N	NA	272	259	228	2	5	2	768	27	20	671	46	4
Cl_cgr-pm_687	UGAAAAUUCACGAUCUUUGAG	21	SupFam_245	N	NA	336	452	322	4	5	5	1124	4	624	493	3	0
Cl_cgr-pm_691	UGCACCUGGUGAACAGAUCGG	21	SupFam_246	N	NA	379	412	331	3	6	6	1137	49	649	389	50	0
Cl_cgr-pm_696	AGUGCAGACUUCACAUUUUAGC	22	SupFam_374	N	NA	345	552	356	2	0	1	1256	0	360	857	39	0
Cl_cgr-pm_707	GAAUGAUAAGUAGGGGUGAGCGUG	24	SupFam_23	N	NA	166	263	242	0	0	0	671	0	0	55	4	612
Cl_cgr-pm_715	GGAUACUAAGAUGCUUUCUCU	21	SupFam_362	N	NA	242	274	240	0	0	1	757	18	675	55	9	0
Cl_cgr-pm_725	CUCGGUAACUUGUCUACUGUU	21	SupFam_589	N	NA	240	231	161	0	0	1	633	12	610	11	0	0
Cl_cgr-pm_731	UCACCUCCAACCGUUUCUCAA	21	SupFam_96	N	NA	163	232	232	1	1	4	633	31	552	27	23	0
Cl_cgr-pm_733	GAAGUUACUCAACAUACCGAAG	22	SupFam_980	N	NA	185	274	173	0	0	0	632	26	26	576	4	0
Cl_cgr-pm_736	CGUGGAUCAACCGGGACACGUU	22	SupFam_357	N	NA	322	392	282	4	4	7	1011	3	31	953	21	3
Cl_cgr-pm_750	AUGGGAGAUGCUUUUAGGUAU	21	SupFam_95	N	NA	144	278	200	0	0	0	622	25	587	10	0	0
Cl_cgr-pm_754	GAUCCGGAGUACUUCCAAGUA	21	SupFam_10	N	NA	199	292	219	0	0	1	711	164	545	1	1	0
Cl_cgr-pm_755	UUUGACAGUACCAUAGCCCUA	21	SupFam_379	N	NA	241	316	224	2	4	6	793	164	617	6	6	0
Cl_cgr-pm_757	UGGCAGGAAUCCCUCCUCUGA	21	SupFam_180	N	NA	232	194	143	2	2	2	575	26	535	11	3	0
Cl_cgr-pm_779	ACUGAAAGUACUCAGGGUCGC	21	SupFam_36	N	NA	320	290	185	0	1	1	797	29	746	19	3	0
Cl_cgr-pm_790	CACCGGACUGGCUAGUACAAAU	22	SupFam_981	N	NA	407	434	283	4	2	2	1132	17	495	588	31	1
Cl_cgr-pm_808	UUAGGCAUAAAUUCGUAAACUA	22	SupFam_1	N	Y	195	320	210	0	4	2	731	13	196	515	7	0
Cl_cgr-pm_815	UAUUUUGAGUCUGUGCAGGAGU	22	SupFam_247	N	NA	284	278	199	4	2	6	773	8	106	567	30	62
Cl_cgr-pm_816	GUCCGAUGGAAUGCUUUAGGC	21	SupFam_590	N	NA	152	273	202	6	8	4	645	5	624	10	6	0
Cl_cgr-pm_826	UGAAAUUCUUAGUGGCAGGUUU	22	SupFam_26	N	Y	325	361	268	1	4	3	962	85	301	556	17	3
Cl_cgr-pm_845	UUCUUUCACAGUCUUGAUGUU	21	SupFam_395	N	NA	166	229	168	0	0	1	564	3	559	1	1	0
Cl_cgr-pm_846	UUGGAGUAAUGCUGUUGCUGAU	22	SupFam_982	N	NA	224	201	178	5	1	1	610	12	13	550	23	12
Cl_cgr-pm_867	GGACAUCAAAACUUAACAUAG	21	SupFam_983	N	NA	236	264	159	6	4	6	675	56	536	80	3	0
Cl_cgr-pm_887	GAAUUUGGUUGGUUCCCUCUAGU	23	SupFam_46	N	NA	131	234	151	0	0	0	516	0	2	7	466	41
Cl_cgr-pm_901	UGUAAUUGAUGAUGUAUGGAG	21	SupFam_984	N	NA	113	208	159	1	2	8	491	8	480	3	0	0
Cl_cgr-pm_904	CCUGGUGAACAGAUCGGAUAGU	22	SupFam_985	N	NA	162	216	154	3	3	8	546	2	15	518	8	3
Cl_cgr-pm_905	UGUCUCGUCAUUCUUUCUGAGU	22	SupFam_591	N	NA	180	245	177	0	0	0	602	3	61	527	10	1
Cl_cgr-pm_927	UCAUUGUCUGAACCUGCUGAAA	22	SupFam_248	N	NA	356	351	278	5	1	3	994	45	111	440	39	359
Cl_cgr-pm_942	CUCAUUCGGAAGGUAUGCCAU	21	SupFam_592	N	NA	161	199	175	1	3	2	541	19	487	35	0	0
Cl_cgr-pm_944	GGAAACUUCUCUGCGGAAGC	20	SupFam_32	N	NA	185	344	243	0	0	1	773	517	209	47	0	0
Cl_cgr-pm_961	GGGACUUUGGUACUGUCAAUG	21	SupFam_249	N	NA	360	355	348	0	0	0	1063	30	940	38	55	0
Cl_cgr-pm_966	UUUGGAAGUAUUUUGGAUCAA	21	SupFam_36	N	NA	300	343	228	2	5	4	882	39	793	42	8	0
Cl_cgr-pm_974	GUUGUAUUCUUCGGUGCCACA	21	SupFam_213	N	NA	228	201	100	2	0	0	531	49	452	12	18	0
Cl_cgr-pm_985	AGGGGAGGGACUCUUUCCAAG	21	SupFam_232	N	NA	163	186	119	2	2	2	474	2	440	30	2	0
Cl_cgr-pm_986	CCAUAGCGACGUUUUUCAUGA	21	SupFam_593	N	NA	122	197	174	1	1	2	497	39	444	14	0	0
Cl_cgr-pm_995	UUGUAUUAGCCAGUCCGGAGA	21	SupFam_986	N	NA	254	308	200	2	8	3	775	42	447	245	41	0
Cl_cgr-pm_996	CUUGGAUGUACUCCUGAUCAA	21	SupFam_163	N	NA	221	208	131	1	3	1	565	103	433	26	3	0
Cl_cgr-pm_1001	UGUGGUCUUUGUGAUGGUUCU	21	SupFam_397	N	NA	188	187	140	2	5	7	529	20	507	2	0	0
Cl_cgr-pm_1013	AUGAAUACCCUCAUCUCACAC	21	SupFam_250	N	NA	214	304	245	5	3	2	773	102	542	87	42	0
Cl_cgr-pm_1017	CACUUCAAUUUUCAAAGUUUC	21	SupFam_251	N	NA	166	175	135	0	1	1	478	11	459	5	3	0
Cl_cgr-pm_1023	GUUCACCUCAAUUGUCUUAUU	21	SupFam_107	N	NA	105	150	238	0	3	0	496	3	461	28	4	0
Cl_cgr-pm_1040	UUAGGCAUAUGUUCAUAGACAA	22	SupFam_1	N	Y	284	345	220	5	3	4	861	27	199	621	12	2
Cl_cgr-pm_1042	UGUAAAUGAAGAAGGCACAGU	21	SupFam_106	N	NA	120	170	186	0	2	1	479	3	470	5	1	0
Cl_cgr-pm_1052	UCAGGAGGUGAAAAACAGCAC	21	SupFam_92	N	NA	146	237	160	1	1	1	546	10	481	55	0	0
Cl_cgr-pm_1066	UGAGUAUCUCGUCUUCUUCUGA	22	SupFam_37	N	NA	193	194	124	6	4	5	526	18	76	425	4	3
Cl_cgr-pm_1077	UUCUUGAACAAGGCCGUGCAU	21	SupFam_183	N	NA	211	202	165	1	4	0	583	24	528	28	3	0
Cl_cgr-pm_1081	CCAGUCACCCCACACCUACUU	21	SupFam_111	N	NA	200	229	208	0	0	0	637	186	443	8	0	0
Cl_cgr-pm_1091	GGUUGAAGGUGACAUUGAGUG	21	SupFam_170	N	NA	117	188	179	0	0	1	485	13	447	25	0	0
Cl_cgr-pm_1094	CCAAUCAUCCCGCACCUACUU	21	SupFam_111	N	NA	173	253	212	1	0	0	639	214	417	8	0	0
Cl_cgr-pm_1097	GCUGUUAUUCACCUCUUGAUU	21	SupFam_364	N	NA	193	216	136	0	0	0	545	7	437	73	28	0
Cl_cgr-pm_1114	AUGAAAAACGUAGCUAUGGGC	21	SupFam_594	N	NA	195	202	195	2	3	3	600	10	527	62	1	0
Cl_cgr-pm_1120	CGCGUAUCAAUAUGUUGUCCCC	22	SupFam_9	N	Y	310	346	238	3	1	4	902	4	122	598	177	1
Cl_cgr-pm_1170	UCCUGCUGGUUGUGUAGUUUU	21	SupFam_99	N	NA	222	274	161	3	2	6	668	16	640	12	0	0
Cl_cgr-pm_1199	UUCCAUAGAUCAUCUAUUACAC	22	SupFam_112	N	NA	146	190	131	2	1	4	474	10	24	431	7	2
Cl_cgr-pm_1206	GGAUACUUCUCUCUUGGAGC	20	SupFam_32	N	NA	131	252	172	0	1	0	556	465	87	4	0	0
Cl_cgr-pm_1208	GAGAAAGAUUGGUGGUCACC	20	SupFam_155	N	NA	278	257	244	1	0	0	780	639	117	24	0	0
Cl_cgr-pm_1222	GGAAAACAUAUUGUUACGCGUU	22	SupFam_15	N	Y	215	275	163	0	1	5	659	1	227	428	2	1
Cl_cgr-pm_1228	GGACUUAGCCUAUCUUCAUGUG	22	SupFam_987	N	NA	144	199	99	0	0	0	442	5	11	423	1	2
Cl_cgr-pm_1237	GCUAAAGAGACAACGGUAUAUU	22	SupFam_988	N	NA	131	153	109	1	0	0	394	0	6	387	1	0
Cl_cgr-pm_1268	UGAAGUUUCUCGUGGCGUUA	20	SupFam_26	N	Y	320	371	258	2	1	2	954	363	451	140	0	0
Cl_cgr-pm_1270	CUUCUUCCCAUACUUUCUCUG	21	SupFam_3	N	Y	142	172	113	2	3	1	433	42	387	2	2	0
Cl_cgr-pm_1271	GAAUGGUAGGUUUGAAGUGAAU	22	SupFam_989	N	NA	161	171	117	5	1	1	456	14	8	396	27	11
Cl_cgr-pm_1278	GGUUGGAUGCUUUACUAGGAAA	22	SupFam_990	N	NA	133	179	117	0	0	0	429	12	66	347	1	3
Cl_cgr-pm_1286	AACUGUGCCUUCUUCAUUUACAAA	24	SupFam_181	N	NA	94	161	143	2	0	0	400	0	0	20	25	355
Cl_cgr-pm_1304	CAUGGAACAAGUUAUCGGGGUA	22	SupFam_177	N	NA	136	167	132	2	3	3	443	5	92	341	5	0
Cl_cgr-pm_1313	GUCGUUACACGUGUCGCUGGU	21	SupFam_595	N	NA	103	155	154	1	0	0	413	4	394	12	3	0
Cl_cgr-pm_1323	UUCCAAAUAUCGUCUAAUACA	21	SupFam_112	N	NA	177	216	164	3	5	4	569	15	360	189	5	0
Cl_cgr-pm_1328	UGGGAGAGGAUAUAAUGACAUGAU	24	SupFam_144	N	NA	109	180	117	0	1	0	407	0	0	3	24	380
Cl_cgr-pm_1330	UGUGAAGGUAUAGAAGUCCUU	21	SupFam_49	N	Y	127	224	159	4	2	1	517	116	393	5	3	0
Cl_cgr-pm_1331	GGGUGCGGGAGAUUGGUUGUC	21	SupFam_596	N	NA	140	148	125	0	0	0	413	8	384	20	1	0
Cl_cgr-pm_1343	CAGAGGGCAUUGUUGUCUGGGU	22	SupFam_211	N	NA	119	162	111	1	0	2	395	0	11	379	4	1
Cl_cgr-pm_1349	GAUCCUGAGUGCUUUCAAUU	20	SupFam_10	N	NA	282	263	219	2	0	0	766	375	384	7	0	0
Cl_cgr-pm_1376	UGUUGGUGGUGAGAUUGUCAAC	22	SupFam_597	N	NA	148	246	172	1	3	1	571	5	69	371	94	32
Cl_cgr-pm_1377	GGACUUGUCUAUCUUCAUGCG	21	SupFam_425	N	NA	161	147	101	0	3	0	412	22	390	0	0	0
Cl_cgr-pm_1390	CAAUCACUUUUGAGAACACAU	21	SupFam_991	N	NA	115	170	104	2	3	1	395	14	380	1	0	0
Cl_cgr-pm_1393	AGCGGCUUGAGAGUAAAAACU	21	SupFam_186	N	NA	157	135	103	1	1	1	398	5	385	7	1	0
Cl_cgr-pm_1410	UGGACAACAGGAUAAUGGCGU	21	SupFam_992	N	NA	303	81	3	0	0	0	387	5	372	8	2	0
Cl_cgr-pm_1418	CGAGCAAGGAGAAGAUAUAGUC	22	SupFam_426	N	NA	154	289	244	5	4	2	698	8	312	369	9	0
Cl_cgr-pm_1421	ACACUUGGGUUGAACCACAUU	21	SupFam_253	N	NA	101	209	121	11	9	2	453	7	362	45	39	0
Cl_cgr-pm_1460	GGCCUAGACUUGGACGUUCAUG	22	SupFam_993	N	NA	131	108	125	0	0	0	364	11	7	340	4	2
Cl_cgr-pm_1464	CUCAUUGUCUGAACCUGCUGA	21	SupFam_248	N	NA	135	157	125	6	1	0	424	38	376	9	1	0
Cl_cgr-pm_1465	GAGAAAGGUUGGAGGUCAUU	20	SupFam_155	N	NA	153	182	191	0	0	0	526	505	10	11	0	0
Cl_cgr-pm_1482	CUUCACAACAACCAUGAUGUU	21	SupFam_598	N	NA	195	302	170	3	2	5	677	15	650	11	1	0
[truncated: 1,786 more rows]
