# Supplementary material for: Compensatory sequence variation between trans-species small RNAs and their target sites
Source: eLife. 2019 Dec 17;8:e49750. doi: 10.7554/eLife.49750 (PMC6917502; doi:10.7554/eLife.49750)
Supplement: Supplementary file 8. — All available in Phytozome version v12.1.6. Format: xlsx [file elife-49750-supp8.xlsx]

## Sheet: Sheet1
Supplementary file 8. Eudicot genomic resources used in this study
All available in phytozome version v12.1.6
Genome version	cDNA files	CDS files
Amaranthus hypochondriacus v1.0	Acoerulea_322_v3.1.transcript.fa	Acoerulea_322_v3.1.cds.fa
Aquilegia coerulea v3.1	Ahalleri_264_v1.1.transcript.fa	Ahalleri_264_v1.1.cds.fa
Arabidopsis halleri v1.1	Ahypochondriacus_459_v2.1.transcript.fa	Ahypochondriacus_459_v2.1.cds.fa
Arabidopsis lyrata v2.1	Alyrata_384_v2.1.transcript.fa	Alyrata_384_v2.1.cds.fa
Arabidopsis thaliana TAIR10	Araport11_cDNA_no-repeats.no-whitespace.fa	Athaliana_447_Araport11.cds.fa
Boechera stricta v1.2	Bstricta_278_v1.2.transcript.fa	Bstricta_278_v1.2.cds.fa
Brassica oleracea capitata v1.0	Boleraceacapitata_446_v1.0.transcript.fa	Boleraceacapitata_446_v1.0.cds.fa
Brassica rapa FPsc v1.3	BrapaFPsc_277_v1.3.transcript.fa	BrapaFPsc_277_v1.3.cds.fa
Capsella grandiflora v1.1	Cgrandiflora_266_v1.1.transcript.fa	Cgrandiflora_266_v1.1.cds.fa
Capsella rubella v1.0	Crubella_474_v1.1.transcript.fa	Crubella_474_v1.1.cds.fa
Carica papaya ASGPBv0.4	Cpapaya_113_ASGPBv0.4.transcript.fa	Cpapaya_113_ASGPBv0.4.cds.fa
Citrus clementina v1.0	Cclementina_182_v1.0.transcript.fa	Cclementina_182_v1.0.cds.fa
Citrus sinensis v1.1	Csinensis_154_v1.1.transcript.fa	Csinensis_154_v1.1.cds.fa
Cucumis sativus v1.0	Csativus_122_v1.0.transcript.fa	Csativus_122_cds.fa
Daucus carota v2.0	Dcarota_388_v2.0.transcript.fa	Dcarota_388_v2.0.cds.fa
Eucalyptus grandis v2.0	Egrandis_297_v2.0.transcript.fa	Egrandis_297_v2.0.cds.fa
Eutrema salsugineum v1.0	Esalsugineum_173_v1.0.transcript.fa	Esalsugineum_173_v1.0.cds.fa
Fragaria vesca v1.1	Fvesca_501_v2.0.a2.transcript.fa	Fvesca_501_v2.0.a2.cds.fa
Glycine max Wm82.a2.v1	Gmax_275_Wm82.a2.v1.transcript.fa	Gmax_275_Wm82.a2.v1.cds.fa
Gossypium raimondii v2.1	Graimondii_221_v2.1.transcript.fa	Graimondii_221_v2.1.cds.fa
Kalanchoe fedtschenkoi v1.1	Klaxiflora_309_v1.1.transcript.fa	Klaxiflora_309_v1.1.cds.fa
Kalanchoe laxiflora v1.1	Kfedtschenkoi_382_v1.1.transcript.fa	Kfedtschenkoi_382_v1.1.cds.fa
Linum usitatissimum v1.0	Lusitatissimum_200_v1.0.transcript.fa	Lusitatissimum_200_v1.0.cds.fa
Malus domestica v1.0	Mdomestica_491_v1.1.transcript.fa	Mdomestica_491_v1.1.cds.fa
Manihot esculenta v6.1	Mesculenta_305_v6.1.transcript.fa	Mesculenta_305_v6.1.cds.fa
Medicago truncatula Mt4.0v1	Mtruncatula_285_Mt4.0v1.transcript.fa	Mtruncatula_285_Mt4.0v1.cds.fa
Mimulus guttatus v2.0	Mguttatus_256_v2.0.transcript.fa	Mguttatus_256_v2.0.cds.fa
Phaseolus vulgaris v2.1	Ppersica_298_v2.1.transcript.fa	Ppersica_298_v2.1.cds.fa
Populus trichocarpa v3.0	Ptrichocarpa_444_v3.1.transcript.fa	Ptrichocarpa_444_v3.1.cds.fa
Prunus persica v2.1	Pvulgaris_442_v2.1.transcript.fa	Pvulgaris_442_v2.1.cds.fa
Ricinus communis v0.1	Rcommunis_119_v0.1.transcript.fa	Rcommunis_119_v0.1.cds.fa
Salix purpurea v1.0	Spurpurea_289_v1.0.transcript.fa	Spurpurea_289_v1.0.cds.fa
Solanum tuberosum v4.03	Stuberosum_448_v4.03.transcript.fa	Stuberosum_448_v4.03.cds.fa
Theobroma cacao v1.1	Tcacao_233_v1.1.transcript.fa	Tcacao_233_v1.1.cds.fa
Trifolium pratense v2	Tpratense_385_v2.transcript.fa	Tpratense_385_v2.cds.fa
Vitis vinifera Genoscope.12X	Vvinifera_457_v2.1.transcript.fa	Vvinifera_457_v2.1.cds.fa
