# Supplementary material for: Compensatory sequence variation between trans-species small RNAs and their target sites
Source: eLife. 2019 Dec 17;8:e49750. doi: 10.7554/eLife.49750 (PMC6917502; doi:10.7554/eLife.49750)
Supplement: Supplementary file 10. — Format: xlsx [file elife-49750-supp10.xlsx]

## Sheet: Sheet1
Supplementary file 10. N. benthamiana targets of HI-sRNAs
Based on N. benthamiana genome v1.0.1
A. thaliana target		HI-sRNA superfamily	N. benthamiana homolog(s)	Primers	Primer set name
Name	Gene ID
BIK1	AT2G39660	SupFam_1	Niben101Scf01176g01025	NJ426-NJ427	BIK1
			Niben101Scf04294g06004
G6PD5	AT3G27300	SupFam_312	Niben101Scf02296g00016	NJ428-NJ429	G6PD5
			Niben101Scf03600g04008
GalOx	AT5G60570	SupFam_281	Niben101Scf09578g00002	NJ430-NJ431	GalOx
SEOR1	AT3G01680	SupFam_5	Niben101Scf01948g01001	NJ432-NJ433	SEOR1 (Set A)
			Niben101Scf27265g00006	NJ434-NJ435	SEOR1 (Set B)
TIR1	AT3G62980	SupFam_27	Niben101Scf00823g01010	NJ436-NJ437	TIR1 (Set A)
			Niben101Scf04271g03003
			Niben101Scf01642g03012	NJ438-NJ439	TIR1 (Set B)
			Niben101Scf00247g05011
Ran BP2	AT3G15680	SupFam_11	Niben101Scf00349g01014
			Niben101Scf01620g02009
Protein_kinase	AT2G07180	SupFam_190	Niben101Scf10157g01009
jmj-family	AT5G46910	SupFam_329	Niben101Scf01822g04006
			Niben101Scf11961g00004
EIL3	AT1G73730	SupFam_305	Niben101Scf00761g07020
CLA1	AT4G15560	SupFam_133	Niben101Scf00246g04005
			Niben101Scf01386g02004
