# Supplementary material for: Compensatory sequence variation between trans-species small RNAs and their target sites
Source: eLife. 2019 Dec 17;8:e49750. doi: 10.7554/eLife.49750 (PMC6917502; doi:10.7554/eLife.49750)
Supplement: Supplementary file 12. — Format: xlsx [file elife-49750-supp12.xlsx]

## Sheet: Sheet1
Supplementary file 12. List of primers used in this study
Name	Sequence (5'->3')	Description	Experiment	comment
Primer 'c'	CGAAATCGGTAGACGCTACG	TrnL-F forward	TrnL-F genotyping	From (Taberlet et al., 1991)
Primer 'f'	ATTTGAACTGGTGACACGAG	TrnL-F reverse	TrnL-F genotyping	From (Taberlet et al., 1991)
NJ410	/5Phos/AGATCGGAAGAGCACACGTCT/3SpC3/	3' SR Adaptor	sRNA-seq	/5Phos/ indicates 5' phosphorylation; /3SpC3/ indicates C3 Spacer for blocking
NJ391	AGACGTGTGCTCTTCCGATCT	NEB SR RT primer	sRNA-seq
NJ411	rGrUrUrCrArGrArGrUrUrCrUrArCrArGrUrCrCrGrArCrGrArUrC	5' SR RNA adaptor	sRNA-seq	rN indicates RNA base
NEB1-1	CAAGCAGAAGACGGCATACGAGATCGTGATGTGACTGGAGTTCAGACGTGTGCTCTTCCGATC*T	NEB barcode Set 1-1	sRNA-seq	* indicates phosphorothioate bond
NEB1-2	CAAGCAGAAGACGGCATACGAGATACATCGGTGACTGGAGTTCAGACGTGTGCTCTTCCGATC*T	NEB barcode Set 1-2	sRNA-seq	* indicates phosphorothioate bond
NEB1-3	CAAGCAGAAGACGGCATACGAGATGCCTAAGTGACTGGAGTTCAGACGTGTGCTCTTCCGATC*T	NEB barcode Set 1-3	sRNA-seq	* indicates phosphorothioate bond
NEB1-4	CAAGCAGAAGACGGCATACGAGATTGGTCAGTGACTGGAGTTCAGACGTGTGCTCTTCCGATC*T	NEB barcode Set 1-4	sRNA-seq	* indicates phosphorothioate bond
NEB1-5	CAAGCAGAAGACGGCATACGAGATCACTGTGTGACTGGAGTTCAGACGTGTGCTCTTCCGATC*T	NEB barcode Set 1-5	sRNA-seq	* indicates phosphorothioate bond
NEB1-6	CAAGCAGAAGACGGCATACGAGATATTGGCGTGACTGGAGTTCAGACGTGTGCTCTTCCGATC*T	NEB barcode Set 1-6	sRNA-seq	* indicates phosphorothioate bond
NEB1-7	CAAGCAGAAGACGGCATACGAGATGATCTGGTGACTGGAGTTCAGACGTGTGCTCTTCCGATC*T	NEB barcode Set 1-7	sRNA-seq	* indicates phosphorothioate bond
NEB1-8	CAAGCAGAAGACGGCATACGAGATTCAAGTGTGACTGGAGTTCAGACGTGTGCTCTTCCGATC*T	NEB barcode Set 1-8	sRNA-seq	* indicates phosphorothioate bond
NEB1-9	CAAGCAGAAGACGGCATACGAGATCTGATCGTGACTGGAGTTCAGACGTGTGCTCTTCCGATC*T	NEB barcode Set 1-9	sRNA-seq	* indicates phosphorothioate bond
NEB1-10	CAAGCAGAAGACGGCATACGAGATAAGCTAGTGACTGGAGTTCAGACGTGTGCTCTTCCGATC*T	NEB barcode Set 1-10	sRNA-seq	* indicates phosphorothioate bond
NEB1-11	CAAGCAGAAGACGGCATACGAGATGTAGCCGTGACTGGAGTTCAGACGTGTGCTCTTCCGATC*T	NEB barcode Set 1-11	sRNA-seq	* indicates phosphorothioate bond
NEB1-12	CAAGCAGAAGACGGCATACGAGATTACAAGGTGACTGGAGTTCAGACGTGTGCTCTTCCGATC*T	NEB barcode Set 1-12	sRNA-seq	* indicates phosphorothioate bond
NEB2-1	CAAGCAGAAGACGGCATACGAGATTGTTGACTGTGACTGGAGTTCAGACGTGTGCTCTTCCGATC*T	NEB barcode Set 2-1	sRNA-seq	* indicates phosphorothioate bond
NEB2-2	CAAGCAGAAGACGGCATACGAGATACGGAACTGTGACTGGAGTTCAGACGTGTGCTCTTCCGATC*T	NEB barcode Set 2-2	sRNA-seq	* indicates phosphorothioate bond
NEB2-3	CAAGCAGAAGACGGCATACGAGATTCTGACATGTGACTGGAGTTCAGACGTGTGCTCTTCCGATC*T	NEB barcode Set 2-3	sRNA-seq	* indicates phosphorothioate bond
NEB2-4	CAAGCAGAAGACGGCATACGAGATGCGGACGGGTGACTGGAGTTCAGACGTGTGCTCTTCCGATC*T	NEB barcode Set 2-4	sRNA-seq	* indicates phosphorothioate bond
NEB2-5	CAAGCAGAAGACGGCATACGAGATGTGCGGACGTGACTGGAGTTCAGACGTGTGCTCTTCCGATC*T	NEB barcode Set 2-5	sRNA-seq	* indicates phosphorothioate bond
NEB2-6	CAAGCAGAAGACGGCATACGAGATCGTTTCACGTGACTGGAGTTCAGACGTGTGCTCTTCCGATC*T	NEB barcode Set 2-6	sRNA-seq	* indicates phosphorothioate bond
NEB2-7	CAAGCAGAAGACGGCATACGAGATAAGGCCACGTGACTGGAGTTCAGACGTGTGCTCTTCCGATC*T	NEB barcode Set 2-7	sRNA-seq	* indicates phosphorothioate bond
NEB2-8	CAAGCAGAAGACGGCATACGAGATTCCGAAACGTGACTGGAGTTCAGACGTGTGCTCTTCCGATC*T	NEB barcode Set 2-8	sRNA-seq	* indicates phosphorothioate bond
NEB2-9	CAAGCAGAAGACGGCATACGAGATTACGTACGGTGACTGGAGTTCAGACGTGTGCTCTTCCGATC*T	NEB barcode Set 2-9	sRNA-seq	* indicates phosphorothioate bond
NEB2-10	CAAGCAGAAGACGGCATACGAGATATCCACTCGTGACTGGAGTTCAGACGTGTGCTCTTCCGATC*T	NEB barcode Set 2-10	sRNA-seq	* indicates phosphorothioate bond
NEB2-11	CAAGCAGAAGACGGCATACGAGATATATCAGTGTGACTGGAGTTCAGACGTGTGCTCTTCCGATC*T	NEB barcode Set 2-11	sRNA-seq	* indicates phosphorothioate bond
NEB2-12	CAAGCAGAAGACGGCATACGAGATAAAGGAATGTGACTGGAGTTCAGACGTGTGCTCTTCCGATC*T	NEB barcode Set 2-12	sRNA-seq	* indicates phosphorothioate bond
NEB3-1	CAAGCAGAAGACGGCATACGAGATCTCTACGTGACTGGAGTTCAGACGTGTGCTCTTCCGATC*T	NEB barcode Set 3-1	sRNA-seq	* indicates phosphorothioate bond
NEB3-2	CAAGCAGAAGACGGCATACGAGATGCTACCGTGACTGGAGTTCAGACGTGTGCTCTTCCGATC*T	NEB barcode Set 3-2	sRNA-seq	* indicates phosphorothioate bond
NEB3-3	CAAGCAGAAGACGGCATACGAGATGCTCATGTGACTGGAGTTCAGACGTGTGCTCTTCCGATC*T	NEB barcode Set 3-3	sRNA-seq	* indicates phosphorothioate bond
NEB3-4	CAAGCAGAAGACGGCATACGAGATCTTTTGGTGACTGGAGTTCAGACGTGTGCTCTTCCGATC*T	NEB barcode Set 3-4	sRNA-seq	* indicates phosphorothioate bond
NEB3-5	CAAGCAGAAGACGGCATACGAGATTAGTTGGTGACTGGAGTTCAGACGTGTGCTCTTCCGATC*T	NEB barcode Set 3-5	sRNA-seq	* indicates phosphorothioate bond
NEB3-6	CAAGCAGAAGACGGCATACGAGATATCGTGGTGACTGGAGTTCAGACGTGTGCTCTTCCGATC*T	NEB barcode Set 3-6	sRNA-seq	* indicates phosphorothioate bond
NEB3-7	CAAGCAGAAGACGGCATACGAGATTGAGTGGTGACTGGAGTTCAGACGTGTGCTCTTCCGATC*T	NEB barcode Set 3-7	sRNA-seq	* indicates phosphorothioate bond
NEB3-8	CAAGCAGAAGACGGCATACGAGATCGCCTGGTGACTGGAGTTCAGACGTGTGCTCTTCCGATC*T	NEB barcode Set 3-8	sRNA-seq	* indicates phosphorothioate bond
NEB3-9	CAAGCAGAAGACGGCATACGAGATGCCATGGTGACTGGAGTTCAGACGTGTGCTCTTCCGATC*T	NEB barcode Set 3-9	sRNA-seq	* indicates phosphorothioate bond
NEB3-10	CAAGCAGAAGACGGCATACGAGATAAAATGGTGACTGGAGTTCAGACGTGTGCTCTTCCGATC*T	NEB barcode Set 3-10	sRNA-seq	* indicates phosphorothioate bond
NEB3-11	CAAGCAGAAGACGGCATACGAGATTGTTGGGTGACTGGAGTTCAGACGTGTGCTCTTCCGATC*T	NEB barcode Set 3-11	sRNA-seq	* indicates phosphorothioate bond
NEB3-12	CAAGCAGAAGACGGCATACGAGATCGATTAGTGACTGGAGTTCAGACGTGTGCTCTTCCGATC*T	NEB barcode Set 3-12	sRNA-seq	* indicates phosphorothioate bond
NEB4-1	CAAGCAGAAGACGGCATACGAGATCCGGTGGTGACTGGAGTTCAGACGTGTGCTCTTCCGATC*T	NEB barcode Set 4-1	sRNA-seq	* indicates phosphorothioate bond
NEB4-2	CAAGCAGAAGACGGCATACGAGATATTCCGGTGACTGGAGTTCAGACGTGTGCTCTTCCGATC*T	NEB barcode Set 4-2	sRNA-seq	* indicates phosphorothioate bond
NEB4-3	CAAGCAGAAGACGGCATACGAGATAGCTAGGTGACTGGAGTTCAGACGTGTGCTCTTCCGATC*T	NEB barcode Set 4-3	sRNA-seq	* indicates phosphorothioate bond
NEB4-4	CAAGCAGAAGACGGCATACGAGATGTATAGGTGACTGGAGTTCAGACGTGTGCTCTTCCGATC*T	NEB barcode Set 4-4	sRNA-seq	* indicates phosphorothioate bond
NEB4-5	CAAGCAGAAGACGGCATACGAGATTGGATCACGTGACTGGAGTTCAGACGTGTGCTCTTCCGATC*T	NEB barcode Set 4-5	sRNA-seq	* indicates phosphorothioate bond
NEB4-6	CAAGCAGAAGACGGCATACGAGATGTCGTCGTGACTGGAGTTCAGACGTGTGCTCTTCCGATC*T	NEB barcode Set 4-6	sRNA-seq	* indicates phosphorothioate bond
NEB4-7	CAAGCAGAAGACGGCATACGAGATGCTGTAGTGACTGGAGTTCAGACGTGTGCTCTTCCGATC*T	NEB barcode Set 4-7	sRNA-seq	* indicates phosphorothioate bond
NEB4-8	CAAGCAGAAGACGGCATACGAGATATTATAGTGACTGGAGTTCAGACGTGTGCTCTTCCGATC*T	NEB barcode Set 4-8	sRNA-seq	* indicates phosphorothioate bond
NEB4-9	CAAGCAGAAGACGGCATACGAGATGAATGAGTGACTGGAGTTCAGACGTGTGCTCTTCCGATC*T	NEB barcode Set 4-9	sRNA-seq	* indicates phosphorothioate bond
NJ412	AATGATACGGCGACCACCGAGATCTACACGTTCAGAGTTCTACAGTCCG*A	NEB SR primer	sRNA-seq	* indicates phosphorothioate bond
NJ392	/5Biosg/AAGCAGTGGTATCAACGCAGAGTACrGrG+G	Template switching oligo	NanoPARE and mRNA-seq	rN indicates RNA base; +N indicates LNA base; /5Biosg/ indicates 5' biotinylation. Used as described in (Schon et al. 2018)
NJ393	AAGCAGTGGTATCAACGCAGAGTACTTTTTTTTTTTTTTTTTTTTTTTTTTTTTTVN	Anchored oligo-dT RT primer	NanoPARE and mRNA-seq	Used as described in (Schon et al. 2018)
NJ394	AAGCAGTGGTATCAACGCAGAGT	ISPCR primers for preamplification	NanoPARE and mRNA-seq	Used as described in (Schon et al. 2018)
NJ396	AATGATACGGCGACCACCGAGATCTACACTATCCTCTCTAGCAAGCAGTGGTATCAACGCAGAGTACGGG	5' TSO enrichment - H503	NanoPARE	Forward
NJ397	AATGATACGGCGACCACCGAGATCTACACGTAAGGAGCTAGCAAGCAGTGGTATCAACGCAGAGTACGGG	5' TSO enrichment - H505	NanoPARE	Forward
NJ398	AATGATACGGCGACCACCGAGATCTACACACTGCATACTAGCAAGCAGTGGTATCAACGCAGAGTACGGG	5' TSO enrichment - H506	NanoPARE	Forward
NJ399	AATGATACGGCGACCACCGAGATCTACACTATCCTCTTCGTCGGCAGCGTC	Nextera Tn5.1 - H503	mRNA-seq	Forward
NJ400	AATGATACGGCGACCACCGAGATCTACACGTAAGGAGTCGTCGGCAGCGTC	Nextera Tn5.1 - H505	mRNA-seq	Forward
NJ401	AATGATACGGCGACCACCGAGATCTACACACTGCATATCGTCGGCAGCGTC	Nextera Tn5.1 - H506	mRNA-seq	Forward
NJ402	CAAGCAGAAGACGGCATACGAGATTCGCCTTAGTCTCGTGGGCTCGG	Nextera Tn5.2 - H701	NanoPARE and mRNA-seq	Reverse
NJ403	CAAGCAGAAGACGGCATACGAGATCTAGTACGGTCTCGTGGGCTCGG	Nextera Tn5.2 - H702	NanoPARE and mRNA-seq	Reverse
NJ404	CAAGCAGAAGACGGCATACGAGATTTCTGCCTGTCTCGTGGGCTCGG	Nextera Tn5.2 - H703	NanoPARE and mRNA-seq	Reverse
NJ405	CAAGCAGAAGACGGCATACGAGATAGGAGTCCGTCTCGTGGGCTCGG	Nextera Tn5.2 - H705	NanoPARE and mRNA-seq	Reverse
NJ406	CAAGCAGAAGACGGCATACGAGATCATGCCTAGTCTCGTGGGCTCGG	Nextera Tn5.2 - H706	NanoPARE and mRNA-seq	Reverse
NJ395	CTAGCAAGCAGTGGTATCAACGCAGAGTACGGG	Sequencing primer read 1	NanoPARE and mRNA-seq	Alternative sequencing primers used in sequencing
NJ416	CCCGTACTCTGCGTTGATACCACTGCTTGCTAG	Sequencing primer i5 index	NanoPARE and mRNA-seq	Alternative sequencing primers used in sequencing
NJ426	GAGTGGTAGCGGCACTGTAA	BIK1-SF1, F	qRT-PCR of Nbe homologs	Niben101Scf01176g01025, Niben101Scf04294g06004
NJ427	ATGGTTCTCCAAGCTGCCC	BIK1-SF1, R	qRT-PCR of Nbe homologs
NJ428	GCAGGTCCTTTGCCTTGTTG	G6PD5-SF312, F	qRT-PCR of Nbe homologs	Niben101Scf02296g00016, Niben101Scf03600g04008
NJ429	GGAACCGTTGGGTCATCCTT	G6PD5-SF312, R	qRT-PCR of Nbe homologs
NJ430	ACAATTCGGAGGCAGGAACA	GalOx-SF281, F	qRT-PCR of Nbe homologs	Niben101Scf09578g00002
NJ431	GCAGCTTTGATTCAGCTCCTC	GalOx-SF281, R	qRT-PCR of Nbe homologs
NJ432	GGAAGCTTTGTGGAGCGTTG	SEOR1-SF27 homolog a, F	qRT-PCR of Nbe homologs	Niben101Scf01948g01001
NJ433	CCAGCTCTCTGTGCTACACTT	SEOR1-SF27 homolog a, R	qRT-PCR of Nbe homologs
NJ434	AACGTGCTCCAGCTGCTATT	SEOR1-SF27 homolog b, F	qRT-PCR of Nbe homologs	Niben101Scf27265g00006
NJ435	CCATTGTTGTTGAGTGCGGG	SEOR1-SF27 homolog b, R	qRT-PCR of Nbe homologs
NJ436	TCTCCTTCCTCAGCTCCGAC	TIR1 homolog primers a, F	qRT-PCR of Nbe homologs	Niben101Scf00823g01010, Niben101Scf04271g03003
NJ437	TCTGACTTCTGGGAACCGTC	TIR1 homolog primers a, R	qRT-PCR of Nbe homologs
NJ438	AACTCCGACAAGGACCGGAA	TIR1 homolog primers b, F	qRT-PCR of Nbe homologs	Niben101Scf01642g03012, Niben101Scf00247g05011
NJ439	TCTGCACCGCCTCTCAATC	TIR1 homolog primers b, R	qRT-PCR of Nbe homologs
NJ440	GGTGGCTCTACCATGTTCCC	ACT2 homolog, F	qRT-PCR of Nbe homologs	Niben101Scf03493g00020, AT3G18780
NJ441	CATCTGCTGGAAGGTGCTGA	ACT2 homolog, R	qRT-PCR of Nbe homologs
NJ442	TTCACGGCTGGGAGATTGAG	TIP41-L homolog, F	qRT-PCR of Nbe homologs	Niben101Scf03385g06003, AT4G34270
NJ443	CTGGCAAGTGAGAGGTCTGG	TIP41-L homolog, R	qRT-PCR of Nbe homologs
NJ444	CACTTCGCCCTTAGCCATCT	PP2A homolog, F	qRT-PCR of Nbe homologs	Niben101Scf09716g01002, AT1G13320
NJ445	TTGCCTGAGATTCGACGGTT	PP2A homolog, R	qRT-PCR of Nbe homologs
